# Supplementary material for: Comprehensive transcriptome and proteome analysis revealed the molecular mechanisms of melatonin priming and waterlogging response in peach
Source: Front Plant Sci. 2025 Feb 7;16:1527382. doi: 10.3389/fpls.2025.1527382 (PMC11842337; doi:10.3389/fpls.2025.1527382)
Supplement: Supplementary Table S3 — List of DEPs in comparison groups. [file Table3.xls]

## Sheet: 245 DEPs in MT vs CK 
Supplementary Table S3 List of DEPs in comparison groups
Protein	log2FC	SE	pvalue	adj_pvalue	Class	Nr_Accession	Nr_Description	Swissprot Identity	Swissprot E-value	Swissprot Accession	Swissprot Description	Protein_or_Domain	KOG Score	KOG E-value	KOG ID	KOG Function-Description	KOG Code	KOG Function-Categories	KEGG(ko_id|rank|evalue|score|db_id|ko_definition)	GO Biological_Process	GO Molecular_Function	GO Cellular_Component	Sequence
Prupe.1G002900.1.p	1.67782	0.624957	0.0277232	0.331548	Up	XP_007223025.1	polyketide synthase 5 isoform X1 [Prunus persica]	93.61	0	sp|B0LDU6|PKS5_RUBID	Polyketide synthase 5 OS=Rubus idaeus GN=PKS5 PE=1 SV=1	-	-	-	-	-	-	-	K00660|1|0.0|807|pper:18793306|chalcone synthase [EC:2.3.1.74]	GO:0009058//biosynthetic process	GO:0016747//transferase activity, transferring acyl groups other than amino-acyl groups	-	MVTVEEVRKAQRAEGPATVLAIGTATPPNCVDQATYPDYYFRITNSEHKAELKEKFQRMCDKSMIKKRYMYLTEEILKENPTMCEYMAPSLDARQDMVVVEIPKLGKEAATKAIKEWGQPKSKITHLVFCTTSGVDMPGADYQLTKLLGLRPSVKRLMMYQQGCFAGGTVLRLAKDLAENNKGARVLVVCSEITAVTFRGPSDTHLDSLVGQALFGDGAAAVIVGADPIPEIEKPLFEVVSAAQTILPDSDGAIDGHLREVGLTFHLLKDVPGLISKNIEKSLNEAFQPLGISDWNSLFWIAHPGGPAILDQVESKLGLKPEKLEATRHILSEYGNMSSACVLFILDEVRKRAAEKGLKTTGDGLDWGVLFGFGPGLTVETVVLHSVGLNA
Prupe.1G007200.1.p	10.6991	9.10546	0.0112402	0.024156	Up	XP_007225277.1	receptor like protein kinase S.2 [Prunus persica]	58.67	0	sp|O48837|LRKS2_ARATH	Receptor like protein kinase S.2 OS=Arabidopsis thaliana GN=LECRKS2 PE=2 SV=2	At2g32800	973	0	KOG1187	Serine/threonine protein kinase	T	Signal transduction mechanisms	K04733|1|1e-93|323|ini:109155686|interleukin-1 receptor-associated kinase 4 [EC:2.7.11.1]		GO:0004674//protein serine/threonine kinase activity;GO:0005524//ATP binding	-	MQLNRLCFVLPADFNEIEPLDCQKLQKPAKEEIKKNPRGYCTSHILAFIKDSLCRLYYDLKWIHFCHHDGTRRKRHSGVFQDMDGIQLQDKAGGDNPRIFSFSELYIGSNGFSEDGVLGSGGFGKVYRAVLPSDGTVVAVKCLVERGEQFEKTFVAELLAVAHLRHRNLVRLRGWCVHENQLFLVYDYMPNLSLDRILFRRPENIGSAPLNWDRRRNIISGLAAALFYLHEQLETQIIHRDIKTSNVMLDSHYNARLGDFGLARWLEHELEYQTKTPSMKNHQFRLSETTRIGGTIGYLPPESFQKRSVATAKSDVFSFGIVVLEVVSGRRAVDLTCPDDQIILLDWIRRLSDEGKLLQAGDNRIPDGSYKLFDMENLFHLALLCTLHNPQSRPNMKWI…
Prupe.1G025100.1.p	10.3892	7.34301	0.00528167	0.0126032	Up	XP_007223220.1	GDP-mannose 3,5-epimerase 2 [Prunus persica]	90.5	0	sp|A3C4S4|GME1_ORYSJ	GDP-mannose 3,5-epimerase 1 OS=Oryza sativa subsp. japonica GN=GME-1 PE=1 SV=1	At5g28840	726	0	KOG1429	dTDP-glucose 4-6-dehydratase/UDP-glucuronic acid decarboxylase	GM	Carbohydrate transport and metabolism;Cell wall/membrane/envelope biogenesis	K10046|1|0.0|796|pper:18792175|GDP-D-mannose 3', 5'-epimerase [EC:5.1.3.18 5.1.3.-]		GO:0051287//NAD binding;GO:0047918//GDP-mannose 3,5-epimerase activity	-	MGTTGGSKYGEYTYENLEREQYWPSEKLRVSITGAGGFIASHIARRLKSEGHYIIASDWKKNEHMTEDMFCNEFHLVDLRVMDNCLKVTSGVDHVFNLAADMGGMGFIQSNHSVIMYNNTMISFNMLEAARINGAKRLFYASSACIYPEFKQLDTSNVSLKESDAWPAEPQDAYGLEKLMTEELCKHYNKDFGIECRIGRFHNIYGPFGTWKGGREKAPAAFCRKTLTSTDKFEMWGDGLQTRSFTFIDECVEGVLRLTKSDFREPVNIGSDEMVSMNEMAEIVLSFENQKLPIHHIPGPEGVRGRNSDNTLIKEKLGWAPTMKLKDGLRITYFWIKEQLAKEKAQGMNLLGYGSSKVVGTQAPVQLGSLRAADGKELL
Prupe.1G028900.1.p	1.11844	0.360675	0.0146445	0.27962	Up	XP_020410284.1	protein SIEVE ELEMENT OCCLUSION B [Prunus persica]	25.63	7e-63	sp|Q9SS87|SEOB_ARATH	Protein SIEVE ELEMENT OCCLUSION B OS=Arabidopsis thaliana GN=SEOB PE=1 SV=1	-	-	-	-	-	-	-	-	-	-	-	MNSIQLNEYSHYGFTLTEPEEILEIICENHAPENHPKFDVRSLFFITENIIKHSTHTSIVSKSDEIKPQNFDNFISPLCALKSIGCEMSCKAVRENSAQTTTLGIFGKLTKYSWEAKAVLALAAFAMEYGNSWLLSQLYPQSDQLTTALAILNRVPLLLNSTANFKKQQETVVELNKTINATLQVIKCILKLDELSAHIDPNHASLKSAKKDVPINTYWSILTIVSCATEVFYLTRDEEKPQAVSILSHFVTKRINDILAKLKRQLTICQKEIDEPKIYRKLLKHVAHAHGKITHVFNTLILFKDNAYAKPATLSVGYTNKEVFDIDVLDGKYITFYISTLDNVSHKDILSLKEVYEGTENNKCKIVWIPIVEDWTEYGREEQFMEWRSKMPWYAVQYL…
Prupe.1G033700.1.p	-10.3318	7.06942	0.0209817	0.0401086	Down	XP_007225236.1	cellulose synthase-like protein E1 [Prunus persica]	34.7	2e-151	sp|Q8VYR4|CSLG2_ARATH	Cellulose synthase-like protein G2 OS=Arabidopsis thaliana GN=CSLG2 PE=2 SV=1	-	-	-	-	-	-	-	K10999|1|1e-132|421|peq:110022035|cellulose synthase A [EC:2.4.1.12]	GO:0071555//cell wall organization;GO:0030244//cellulose biosynthetic process	GO:0016760//cellulose synthase (UDP-forming) activity	GO:0016021//integral component of membrane	MHVPSTKLVPIEEDMESSSKLPLHICHVHKLSIVINRTHIFFHSIALVFLLYYRASFFFFQDPTKTKATTVAWLLVFVSEILLSFEWLLGQSSRWRRVSRTAFPERLPADDKLPAVDVFICTADPEKEPTVGVMNTVLSAMAMNYPPEKLHVYLSDDGGAAVTLKGMREAWRFAKWWLPFCRRYGIKCRAPEAYFSAEEEDADFGGSEFIQDREDIKEKYEAFKKKVKATVGDTRSGPSRDHPAVIEVIQETSSDDAIQENETKNIPLLVYVSREKRPSHFHNFKAGALNVLLRVSGVISNSPYILGLDCDMHCHDPSSARQAMCFHLDPKISPSLAFVQFPQKFHNISNNDIYDSQMRSIFWLLWQGVDGVGGPGVAGTGYYIKRLSLCSSSKHEDGD…
Prupe.1G063400.1.p	1.19025	0.340173	0.0080915	0.265552	Up	XP_007225240.1	cycloartenol synthase 2 [Prunus persica]	86.38	0	sp|Q8W3Z3|CAS2_BETPL	Cycloartenol synthase 2 OS=Betula platyphylla GN=CASBPX2 PE=1 SV=1	At2g07050	1332	0	KOG0497	Oxidosqualene-lanosterol cyclase and related proteins	I	Lipid transport and metabolism	K01853|1|0.0|1579|pper:18790596|cycloartenol synthase [EC:5.4.99.8]		GO:0016866//intramolecular transferase activity	-	MWKLKIAEGGSPWLRTLNNHVGRQVWEFDPKLGTPEELLEIEKAREHFRNNRFVKKHSSDLFMRMQLSKENPGHAVLPQIKVKDTEDVTGETVTNTLRRAINFHSSLQAHDGHWPGDYGGPMFLLPGLVITLSITGALNAVLSDEHKREICRYLYNHQNKDGGWGLHIEGPSTMFGSVLTYVTLRLLGEGAKDGQGAMESGRKWILDHGGATAITSWGKMWLSVLGAFEWSGNNPLPPEIWLLPYMLPIHPGRMWCHCRMVYLPMSYLYGKRFVGPITPTVLSLRKELFNVPYHEIDWNVARNQCAKEDLYYPHPLVQDILWSSLHMAVEPILMRWPGKKLREKALKTAIEHIHYEDENTRYICIGPVNKVLNMLCCWVEDPNSEAFKLHLPRIYDYLW…
Prupe.1G067700.1.p	10.3826	7.3097	0.0063872	0.0146356	Up	XP_020410797.1	isoamylase 1, chloroplastic isoform X2 [Prunus persica]	78.19	0	sp|O04196|ISOA1_ARATH	Isoamylase 1, chloroplastic OS=Arabidopsis thaliana GN=ISA1 PE=1 SV=1	At2g39930	1234	0	KOG0470	1,4-alpha-glucan branching enzyme/starch branching enzyme II	G	Carbohydrate transport and metabolism	K01214|1|0.0|1676|pper:18790280|isoamylase [EC:3.2.1.68]	-	-	-	MEQQQHQLTNCSTWSTAPKLHHLLHQNPQRIAFSNGRRQKSNQKKKSLNWRMRGFGNETPVLVVKASNGGAGTDVVETAVVDRPKLRRFQVSQGHPSPFGATTRDGGVNFAVYSANAVSVTLCLITLSDLEEDKVTEQLSLDPLTNKTGNVWHVFLKGDFKDTLYGYKFEGKFSPEEGLYYDSSKIVLDPYAKAVIRRGEYGKLSPDGNCWPQMAGTVPSFDDEFDWEGDLPLNYPQKDLIIYEIHVRGFTRHESSMAELPGTYLGLVEKLDHLKELGINCIELMPCHEFNELEYFGYNSVLGDYKVNFWGYSTVNYFSPMIRYSSAGIRNCGRDAINEVKFLIKEAHKRGIEVIMDVVFNHTAEGNENGPILSFRGADNSIYYMLAHKGEFYNYSGCG…
Prupe.1G069700.1.p	1.37657	0.372529	0.0209232	0.303963	Up	XP_020410064.1	ribosomal RNA processing protein 1 homolog [Prunus persica]	-	-	-	-	Hs22067314	115	1e-26	KOG3911	Nucleolar protein NOP52/RRP1	A	RNA processing and modification	K14849|1|0.0|1163|pper:18788621|ribosomal RNA-processing protein 1	-	-	-	MQASQNLEIQNQSTNMEAETATEEGLSLIKQLASCNKSGRDRALRVLLKTWLPTQLNLHDDHMKKLWKGLFYCVWHADKVPVQTQLIDRLSSLVLSLHLPLSIHYFSAFLLTMRREWSGIDALRLDKFYLLIRRFMASFFALMRNNLWDLELVKRLMGVLEEVTFFADDKFLGNGVNYHIASVFLEELRPYLPLKAEVLEVVLVSFISVSAKVPDKVLLGKIRSNMFDALLGAGKRLLEVKKLGEDVGSGDEVMVFGSIALTMGFSSKFYELGSSPECCQGNRKVLFGLHEEFLKLEKELESSGIEISIPDVVYNDDEVVPTLVPLAGEEMEVGNSEPSEVVMVNGSAEKLLKKCKNREKDTGAADTKAEKKKKKKKKNKKENGILDSDSEKSSTDREN…
Prupe.1G085400.1.p	1.44096	0.342227	0.00295364	0.234959	Up	XP_007227446.1	NADPH--cytochrome P450 reductase 2 [Prunus persica]	76.42	0	sp|Q9SUM3|NCPR2_ARATH	NADPH--cytochrome P450 reductase 2 OS=Arabidopsis thaliana GN=ATR2 PE=1 SV=1	At4g30210	1092	0	KOG1158	NADP/FAD dependent oxidoreductase	C	Energy production and conversion	K00327|1|0.0|1475|pper:18788591|NADPH-ferrihemoprotein reductase [EC:1.6.2.4]		GO:0050661//NADP binding;GO:0050660//flavin adenine dinucleotide binding;GO:0003958//NADPH-hemoprotein reductase activity;GO:0010181//FMN binding	GO:0016021//integral component of membrane;GO:0005789//endoplasmic reticulum membrane	MDSSSSSMKISPLDLMAAIIKGKMDPSNASADLSGAQVTSVMLENREFVMILTTSIAVLIGCVVVLIWRRSSAPPKPRVIQPPAPVIVTSEPEVDDGTKKVTIFFGTQTGTAEGFAKALAEEGKARYEKVTFKVVDLDDYAADDEAYEEKLKKESLAFFFLATYGDGEPTDNAARFYKWFTEGNERGEWLQTLHYGVFGLGNRQYEHFNKVAVVVDDVLTEQGAKRLVPVGLGDDDQCIEDDFSAWRESVWPELDQLLRDEDDAMTPISTPYTAAVLEYRVVIEDSADASVENKSWNNANGHAVIDAQHPCRANVAVRKELHTPASDRSCTHLEFDIAGTGLTYETGDHVGVYCENLPEIVEEALSLLGLSPETYFSIHTDKEDGTPLSGSSLAPPFPP…
Prupe.1G086000.1.p	1.03305	0.385067	0.0278062	0.331548	Up	XP_007225866.2	(DL)-glycerol-3-phosphatase 2 [Prunus persica]	75.63	1e-139	sp|Q8VZP1|GPP2_ARATH	(DL)-glycerol-3-phosphatase 2 OS=Arabidopsis thaliana GN=GPP2 PE=1 SV=1	At5g57440	363	1e-128	KOG2914	Predicted haloacid-halidohydrolase and related hydrolases	R	General function prediction only	K17623|1|7e-179|494|pper:18791504|pseudouridine 5'-phosphatase [EC:3.1.3.96]	GO:0006114//glycerol biosynthetic process	GO:0043136//glycerol-3-phosphatase activity	GO:0005737//cytoplasm	MTNPSQAVSSRGPITHVIFDMDGLLLDTEKFYTEVQEIILARYNKTFDWSLKAKMMGKKAIEAARVFVEETGISDTLTAEDFLVEREAQLQSMFPTSDLMPGASRLIRHLHEKGIPFALATGSHKRHFELKTQRHGELFSLMHHVVLGDDPEVKQGKPSPDIFLAAAKRFEGAPIDPKKILVFEDAPAGVLAAKNAGMSVVMVPDPRLDSSFYDIADQVVKSLLDLNPNDWGLPPFDNPAS
Prupe.1G088200.1.p	10.5623	8.27988	3.72697e-05	0.000148222	Up	XP_007227618.1	nicotianamine synthase [Prunus persica]	49.24	1e-95	sp|Q9XGI7|NAS_SOLLC	Nicotianamine synthase OS=Solanum lycopersicum GN=CHLN PE=2 SV=1	-	-	-	-	-	-	-	K05953|1|2e-171|479|fve:101314050|nicotianamine synthase [EC:2.5.1.43]	GO:0030418//nicotianamine biosynthetic process	GO:0030410//nicotianamine synthase activity	-	MASFQISNSETQIPAQLLIARITQLHSSISKLDSLRPSKQVNALFSQLVKLCILPCDIDIMDLSKEAQVMRESLMNLCGRAEGFLELEFATLLVSVPQPLNNLNLFPYYSNYVLLANLEHKILLDNGLVHPHKVAFVGSGPMPLTSMIMATHHMKSTNFDNFDIDEKANDVARKIVASDAELAKRMKFETHDVMKLRERLGEYDCIFLAALVGMKKEEKIKILGHIGKYMKEGSVLLVRSAKGARAFLYPVVEEHDLLGFELLTIFHPNNEVVNSVVLVRKPTF
Prupe.1G106300.1.p	10.5894	8.43825	0.00010489	0.000386083	Up	XP_007223307.1	probable receptor-like protein kinase At5g18500 [Prunus persica]	68.13	0	sp|Q8LEB6|Y5185_ARATH	Probable receptor-like protein kinase At5g18500 OS=Arabidopsis thaliana GN=At5g18500 PE=2 SV=1	At1g56720	694	0	KOG1187	Serine/threonine protein kinase	T	Signal transduction mechanisms	K04733|1|0.0|716|oeu:111382865|interleukin-1 receptor-associated kinase 4 [EC:2.7.11.1]	GO:0006468//protein phosphorylation;GO:0007166//cell surface receptor signaling pathway	GO:0004672//protein kinase activity;GO:0004675//transmembrane receptor protein serine/threonine kinase activity;GO:0005524//ATP binding	GO:0016021//integral component of membrane;GO:0005886//plasma membrane	MASGLDTVLAKKTFVFGLRVWVLTGIIVGVFIVMILAVLSVCLTSRKRSRKSNDMLPLSQIPNVSKEIKEIRVDQVSSNNYVPRNSSFLTLSDKFNDRESEKVLIHKNGDSSSRSGSFNNTEKENVGSPSGEEGGAGTAYFRPSSHPITAPSPLSGLPEFSRLGWGHWFTLRDLEFATNRFSKENVIGEGGYGVVYQGNLINGTPVAVKKLLNNLGQAEKEFRVEVEAIGHVRHKNLVRLLGYCIEGTHRLLVYEYVNNGNLEQWLHGAMRHHGYLTWEARMKVLLGTAKALAYLHEAIEPKVVHRDIKSSNILLDDDFNAKISDFGLAKLLGAGKSHITTRVMGTFGYVAPEYANSGLLNEKSDVYSFGVVILEAITGRDPVDYGRPAQEVNLVDWLK…
Prupe.1G122000.1.p	-10.4059	7.43993	0.0170697	0.0337493	Down	XP_007223507.1	DNA-directed RNA polymerases II, IV and V subunit 9A isoform X1 [Prunus persica]	89.47	1e-77	sp|Q6NLH0|RPB9A_ARATH	DNA-directed RNA polymerases II, IV and V subunit 9A OS=Arabidopsis thaliana GN=NRPB9A PE=1 SV=1	At3g16980	224	3e-77	KOG2691	RNA polymerase II subunit 9	K	Transcription	K03017|1|3e-83|242|pmum:103323131|DNA-directed RNA polymerase II subunit RPB9	GO:0006379//mRNA cleavage;GO:0006351//transcription, DNA-templated	GO:0008270//zinc ion binding;GO:0003676//nucleic acid binding;GO:0003899//DNA-directed 5'-3' RNA polymerase activity	GO:0005730//nucleolus	MSTMKFCRECNNILYPKEDKDQKILLYACRNCDHQEVADNNCVYRNEIHHAVGERTQILQDVAADPTLPRTKAVRCSECKHGEAVFFQATARGEEGMTLFFVCCNPSCGHRWRD
Prupe.1G134600.1.p	10.1808	6.35465	0.00485437	0.0118659	Up	XP_007222268.1	chaperone protein dnaJ 49 [Prunus persica]	58.76	3e-132	sp|Q9FH28|DNJ49_ARATH	Chaperone protein dnaJ 49 OS=Arabidopsis thaliana GN=ATJ49 PE=2 SV=2	At5g49060	382	4e-132	KOG0714	Molecular chaperone (DnaJ superfamily)	O	Posttranslational modification, protein turnover, chaperones	K09518|1|0.0|727|pper:18792211|DnaJ homolog subfamily B member 12	-	-	-	MDGNKDEALKCVRIAEEAIASGNKGRALKFIKIARRLNQSLQVNELLAACEKIDSGSPASSIGEKGATEIKNEPGVEKLGQGLNGEVSYTEEHVQLIRKIKRNKDYYAILGVEKTCSVEDIRKAYRKLSLKVHPDKNKAPGSEEAFKIVSKAFKCLSDGDSRRQYDQTGLVDEFEYNQQHNVRRRRRRAGHDLFDDDFDPDEIFRAFFGQSDMFRTSHVYRTSRTAGHQREEVQGGGPNIMVLIQLLPFLVIVLLAYLPFSEPNYSLQKTYNYQIPKTTEKHGVEFYVKSEAFDENYPLGSVARSNIENHVIKDYKNVLLHYCRVELQRRHWSKNLPTPHCDKLNNLGVV
Prupe.1G169100.1.p	-1.01806	0.319398	0.0128527	0.271426	Down	XP_007221281.1	crocetin glucosyltransferase, chloroplastic [Prunus persica]	63.73	0	sp|F8WKW0|UGT1_GARJA	Crocetin glucosyltransferase, chloroplastic OS=Gardenia jasminoides GN=UGT75L6 PE=1 SV=1	At1g05560	442	1e-151	KOG1192	UDP-glucuronosyl and UDP-glucosyl transferase	GC	Carbohydrate transport and metabolism;Energy production and conversion	K13692|1|0.0|632|mesc:110614295|UDP-glucose:(indol-3-yl)acetate beta-D-glucosyltransferase [EC:2.4.1.121]	GO:0008152//metabolic process	GO:0016758//transferase activity, transferring hexosyl groups	-	MVQHRFLLVTFPAQGHINPSLQFAKHLVRTTGAHVTYVTSLSAQSRIGNGSTPHGLTYSLYSDGYDNGFKDGDDIDHYMSELRRCGAQAITDLIVSSAKEGRPYTCLIYTILLPWAAEAARELHLPSVLVWIQPATVFDIYYYYFSGYKDLIRKNTCTTHPNGALCSIELPGLPLSLASRDLPSFMVGSNPYGFALPLFEEQFELLERETKPIILVNTFDALEPEALKAIDKYNLIGIGPLIPSAFLDGKDPSDKSFPGDRFQKSEDSSYIEWLNSRPEGSVVYVSFGSISVLSKPQMEEIAKGLLDSGRPFLWVIREKEGSNGRDKEAEKEEEKLSCREELEELGKIVPWCSQVEVLSSPSLGCFVTHCGWNSSLESLVSGVPVVAFPQWTDQGTNAK…
Prupe.1G175200.1.p	10.5471	8.19238	2.12628e-05	0.000118828	Up	XP_007225436.1	phosphoglucan, water dikinase, chloroplastic [Prunus persica]	66.07	0	sp|Q6ZY51|PWD_ARATH	Phosphoglucan, water dikinase, chloroplastic OS=Arabidopsis thaliana GN=GWD3 PE=1 SV=1	-	-	-	-	-	-	-	K15535|1|0.0|2443|pper:18793876|phosphoglucan, water dikinase [EC:2.7.9.5]		GO:0016301//kinase activity;GO:2001070//starch binding;GO:0005524//ATP binding	-	MDCLHSLHTSASSQLRRHKQFRFLHHQHQCLGSLAVPPFFGHKRNFRPLCHQSNARLIVCSAGVSSAQSIEEEKESKMKSKSKSGNEKVRLNVRLDHQVEFGESVVILGSIKELGSWKKKVPMNWTESGWVCSLEFKGGESVEYKFLTVRADKTVLWEGGDNRVLKLPKGGNFGIVSHWNATGEAVDLLPLEKEEDVGNNGSTIVDTVSTPEVGTSPFVGQWKGNAISFMRSNEHGNREAGRILDTSGLQGLALKLVEGDRNARNWWRKLEVVRDLLVGSSQSEDRLDALINSAIYLKWINTGQIPCFEDGGHHRPNRHAEISRVIFRELERISCRKDTSPQEVLVVRKIHPCLPSFKAEFTASVPLTRIRDIAHRNDIPHDLKQEIKHTIQNKLHRNA…
Prupe.1G181200.1.p	10.2453	6.64492	2.62149e-05	0.000118828	Up	XP_007223957.1	ras-related protein RABA5e [Prunus persica]	84.79	1e-130	sp|P19892|RAA5E_ARATH	Ras-related protein RABA5e OS=Arabidopsis thaliana GN=RABA5E PE=2 SV=1	At1g05810	366	2e-130	KOG0087	GTPase Rab11/YPT3, small G protein superfamily	U	Intracellular trafficking, secretion, and vesicular transport	K07904|1|1e-161|449|pper:18789125|Ras-related protein Rab-11A		GO:0003924//GTPase activity;GO:0005525//GTP binding	-	MSSSDEEGSGEEYLFKIVIIGDSAVGKSNLLSRYARNEFNAHSKATIGVEFQTQSMEIDGKEVKAQIWDTAGQERFRAVTSAYYRGAVGALIVYDITRKTTFESVGRWLDELKTHSDTTVAMMLVGNKCDLENIRDVSVEDGKGLAEAEGLFFMETSALDSTNVIKAFELVIQEIYNNVSRKVLNSDTYKAELSVNRVSLVNNGADGSKKSQGYFSCCSG
Prupe.1G207300.1.p	1.24826	0.364544	0.00903207	0.265737	Up	ONI29641.1	hypothetical protein PRUPE_1G207300 [Prunus persica]	72.26	0	sp|Q8W4D4|BAGP1_ARATH	BAG-associated GRAM protein 1 OS=Arabidopsis thaliana GN=BAGP1 PE=1 SV=1	At3g59660	737	0	KOG1032	Uncharacterized conserved protein, contains GRAM domain	S	Function unknown	K11968|1|2e-44|171|aly:ARALYDRAFT_907477|ariadne-1 [EC:2.3.2.31]!K12486|2|2e-06|54.7|sind:105175793|stromal membrane-associated protein	-	-	-	METVSLDFLVPSLWEIEVAVAASVFVIFAYWFFTYRGGGGGYADRPVVDNSGAFGDAIDDKDKIQLKGDLQNSSAYLIKLELLAAKNLIGANLNGTSDPYAMITCGTEKRFSSMVPGSRNPMWGEEFNFSVDELPVKINVTIYDWDIIWKSTVLGSVTVPVESEGQTGAVWYTLDSSSGQVCLHIKTIKLPVNSSSGRAMNGYAGANPRRRVPSDKQGPTVVHQKPGPLQTIFNLLPDEVVEHSYSCALERSFLYHGRMYVSAWHICFHSNVFSKQMKVIIPFGDIDEIRRSQHAFINPAITIILRMGAGGHGVPPLGSPDGRVRYKFASFWNRNHAFRGLHRTEKNYHAMLEAEKKEKAASALRAHSSSVKGSQAKIPEDIIPKTGKLPAFIKEEVIT…
Prupe.1G211500.1.p	1.24742	0.36889	0.00961961	0.265737	Up	XP_007225343.1	DNA replication licensing factor MCM2 [Prunus persica]	78.76	0	sp|B8BKI8|MCM2_ORYSI	DNA replication licensing factor MCM2 OS=Oryza sativa subsp. indica GN=OsI_36121 PE=3 SV=1	At1g44900	1365	0	KOG0477	DNA replication licensing factor, MCM2 component	L	Replication, recombination and repair	K02540|1|0.0|1942|pper:18788747|DNA replication licensing factor MCM2 [EC:3.6.4.12]	GO:0006270//DNA replication initiation;GO:0006268//DNA unwinding involved in DNA replication	GO:0003677//DNA binding;GO:0003678//DNA helicase activity;GO:0005524//ATP binding	GO:0042555//MCM complex;GO:0005634//nucleus	MAGNAENPPSTPDSPTSVGFNTDQLPHTSRTSENFSSSSDDDEAAVDPEIVRDEPEEDVLLEEEEGEDLFHDNFLDDYRRMDEHDQYESLGLDDSVEDERDLDQIMADRRAAEIELDTRDGVQTTRKLPHLLHDQDTDDDSYRPSKRARADFRPPRSYDDNDGMQSSPGRSQCGNSREDVPMTDQTDDDGYEDDDDQEAEFEMYRVQGTLREWVTRDEVRRFIAKKFKEFLLTFVKKGSSDIEYVRLINEMVLANKCSLEIDYKQFIGTHPNIAIWLADAPQSVLEVMEDVAKNVVFSLHPNYKRIHQKIYVRITNLPVYDQIRNIRQIHLNTMIRIGGVVTRRSGVFPQLQQVKYDCNKCGAILGPFFQNSYSEVKVGSCPECQSKGPFSVNIEQTIY…
Prupe.1G225300.1.p	1.15701	0.375355	0.0150611	0.27962	Up	XP_020415792.1	uncharacterized protein LOC18790964 [Prunus persica]	-	-	-	-	At5g51920	99.4	2e-22	KOG2142	Molybdenum cofactor sulfurase	H	Coenzyme transport and metabolism	K15631|1|2e-23|106|ini:109152987|molybdenum cofactor sulfurtransferase [EC:2.8.1.9]	-	-	-	MGRNIQEKDIMNGKLKDIVNGEIQELASGSLPKSPTQDGSPKKDGRPSSMVIKKAHTMFPAHLIAEAISSLRGLDLRWSGPITPSEMLYVQQYIFAKYPQYCNGLVEEVEKLEIDNLSINEESSATTPQEKLKSPKSVTPKELSPFSTTHSDLDRTQMEPSRLLDILTKKSSFQGNFVSIPEVQASNRALKQCGLQEEDYLVLFMANYKDAMVMIGESYPFFRGNYYMTIVSDETDAIREFASNKETRIISAPETWLDLRIKGSQLSQYFRRKCKHSPKGLFSYPATVNGTKYSMHWISEAHRNSWHVLLDATGLVLGEDRLTLALYRPDFVLCTLNNTHTQPSSITCLLVRRKTFDTMAHTA
Prupe.1G245200.1.p	10.4216	7.50948	2.31965e-05	0.000118828	Up	ONI30336.1	hypothetical protein PRUPE_1G245200 [Prunus persica]	-	-	-	-	-	-	-	-	-	-	-	K10523|1|6e-20|93.6|mtr:MTR_4g009630|speckle-type POZ protein!K07517|2|2e-11|69.3|atr:18427060|Delta3-Delta2-enoyl-CoA isomerase [EC:5.3.3.8]!K01807|3|2e-08|60.1|zma:100285676|ribose 5-phosphate isomerase A [EC:5.3.1.6]!K20535|4|6e-07|54.7|nta:107797610|mitogen-activated protein kinase 1/2 [EC:2.7.11.24]	-	-	-	MLLKLFQLHKMAEKATKLKQRKRKEKQGNEHEGDEKCYLRWNIQMDRSLAEILREERQMGHKGDGGWKSVAYNTAAAILSAQYNIEVSADNIKNRVKTWKRFYAVVSDILSQSGFSWDATKKMITIDEENVWNEYVKSHEDARTFRYKVIANWDDIVDLCGKDRATGEGAETCFEAAEVMTPDSEPNNFVDLGADTQGFENSHIDDVSPNSSCPKKRNQPSSEIRPPKKRGTPNVLADSVAKMASSFEQFINATTQKLDPLEVYNEVNAIPELNPDEQLKACTWFIENEKQFLMLKTLPVERKKGMVLMFISPRA
Prupe.1G250300.1.p	10.7731	9.58673	0.013907	0.0283048	Up	EOY00528.1	RNA polymerases N / 8 kDa subunit [Theobroma cacao]	94.37	8e-46	sp|Q39290|RPAB5_BRANA	DNA-directed RNA polymerases I, II, and III subunit RPABC5 OS=Brassica napus PE=3 SV=1	At1g61700	138	1e-44	KOG3497	DNA-directed RNA polymerase, subunit RPB10	K	Transcription	K03007|1|2e-47|149|tcc:18609497|DNA-directed RNA polymerases I, II, and III subunit RPABC5	GO:0006366//transcription from RNA polymerase II promoter;GO:0006360//transcription from RNA polymerase I promoter;GO:0006351//transcription, DNA-templated;GO:0006383//transcription from RNA polymerase III promoter	GO:0003677//DNA binding;GO:0003899//DNA-directed 5'-3' RNA polymerase activity;GO:0008270//zinc ion binding	GO:0005736//DNA-directed RNA polymerase I complex;GO:0005665//DNA-directed RNA polymerase II, core complex;GO:0005666//DNA-directed RNA polymerase III complex	MIIPVRCFTCGKVIGNKWDTYLDLLQADYTEGDALDALGLVRYCCRRMLMTHVDLIEKLLNYNTLEKSENS
Prupe.1G288600.1.p	10.3163	6.98017	0.000488679	0.00150967	Up	XP_007223024.1	putative methylesterase 11, chloroplastic [Prunus persica]	62.61	1e-149	sp|F4IE65|MES13_ARATH	Putative methylesterase 13, chloroplastic OS=Arabidopsis thaliana GN=MES13 PE=2 SV=1	-	-	-	-	-	-	-	K13544|1|2e-50|175|thj:104804464|pheophorbidase [EC:3.1.1.82]	-	-	-	MGNSLVCFSPSHKKPNNNNNFNREPSKRSPYSSPFLSSIASTRRSNGSSKKKEMLADDLLLQQQAIEAVLLFQNHQKNASSIPLNRSTSVVYPSPGQQNQSFTKSSSSRQRLRSDAVSFQPLELVDKQDVKTDGLETNHFILVHGGGFGAWCWYKSMTLLEESGFKVDAVDLTGSGVHSFDTNSITSLAQYVKPLTDILEKLGDGKKVILVGHDFGGTCISYVMELFPSKIAKAIFISAAMLASGQSALNLFAQQTGSNDLMRQAQIFLYANGKDQPPTAINLDKKLAEDLLFNQSPAKDVALASVSMRPIPFAPVTEKLSLSGTNYGSVRRFFIVTQEDHAISVPLQETMIELNPPEQVFRLKGSDHAPFFSRPQALHRILVEISQIPPI
Prupe.1G295300.1.p	1.3771	0.429389	0.0124782	0.271426	Up	XP_007226447.1	UDP-glycosyltransferase 89A2 [Prunus persica]	53.42	2e-175	sp|Q9LZD8|U89A2_ARATH	UDP-glycosyltransferase 89A2 OS=Arabidopsis thaliana GN=UGT89A2 PE=2 SV=1	At5g03490	500	4e-175	KOG1192	UDP-glucuronosyl and UDP-glucosyl transferase	GC	Carbohydrate transport and metabolism;Energy production and conversion	K13496|1|2e-84|272|mus:103974358|UDP-glucosyl transferase 73C [EC:2.4.1.-]!K22771|2|3e-84|273|zju:107432050|flavonol-3-O-L-rhamnoside-7-O-glucosyltransferase [EC:2.4.1.-]	GO:0008152//metabolic process	GO:0016758//transferase activity, transferring hexosyl groups	-	MSTSGKTHILVFPYPAQGHMLPILDLTHQLALHGLSITILVTPKNLPNLTPLLHTHPSSIQTVVLPFPPHPKIPSGVENIKDIGNHGNLYVINALANLQAPIVHWFSSHPNPPVALISDFFLGWTLHLAHQLGIPRITFYSSGAFLASVFHYCWRNLDKMRSSSGIVHFPDLPRSPSFKQDQVPSVVRCHKESDPESELLRNSMLANTESWGCVFNSSEDLEAEYFAHLRAKMGHSRVYAVGPLSLTAAEAADDSSLGRANPNKDSDANVMTWLDGCPDGSVLYVCFGSQKLPNRQQMEALASGLERSRVRFVWAVKTGSAQQVKDGYGVLPDGFEERVGGRGLVIKGWAPQVLILGHKAVGGFVSHCGWNSVLEAIVAGVLILGWPMEADQFVNAKLL…
Prupe.1G305100.1.p	2.22914	0.605169	0.0061879	0.243714	Up	XP_007222274.1	leucoanthocyanidin reductase [Prunus persica]	69.04	7e-171	sp|Q84V83|LAR_DESUN	Leucoanthocyanidin reductase OS=Desmodium uncinatum GN=LAR PE=1 SV=1	-	-	-	-	-	-	-	K13081|1|0.0|718|pper:18789589|leucoanthocyanidin reductase [EC:1.17.1.3]	-	-	-	MTVSTCVSAAKNGRILIVGATGFIGRFVAEASLDAGQPTYVLIRPGPLDPSKADIIKSLKDRGAIILHGVISDKALMEKLLREHEIEVVISAVGGTTILDQIILVEAIQAVGTIKRFLPSEFGHDVDRADPVEPGLTMYLEKRQVRRCVEKSGVPYTYICCNSIASWPYFDNKHPSEVLPPLDQFQIYGDGSVKAYFIDGADIGKFTMKTVDDIRTMNKNVHFRPPSNLYDINGLASLWEKKIGRTLPRVTITEDDLLTIAAENRIPESIVASFTHDIFIKGCQVNFPVDGPHDVEIGTLYPEESFRTLDECFNDFLLKLEDEQELEKNKVSTKTTAVVEPRAVTATCA
Prupe.1G305300.1.p	10.2492	6.66672	0.000289917	0.000937488	Up	XP_007222098.1	SUPPRESSOR OF GAMMA RESPONSE 1 [Prunus persica]	58.46	6e-180	sp|Q6NQK2|NAC8_ARATH	SUPPRESSOR OF GAMMA RESPONSE 1 OS=Arabidopsis thaliana GN=SOG1 PE=1 SV=1	-	-	-	-	-	-	-	-	GO:0006355//regulation of transcription, DNA-templated;GO:0006351//transcription, DNA-templated	GO:0003677//DNA binding	GO:0005634//nucleus	MAGPSWLVDKNRIATKIKSASGTCDPERIKWQSNPTRACPNCQYTIDNSDVAQEWPGLPKGVKFDPTDQEIIWHLIAKSGAEDLKSHPFIDEFIITVDDDEGICCSHPHKLPSVKQDGSASHFFHRAIKAYNTGTRKRRKIHDGDGDVRWHKTGRTKPVMLDGVQRGCKKIMVLYMSTVGGGKPKKTNWVMHQYHLGTEEDEKDGEYVISKIYYQQQQVKQADKTDQDIPEGFDLVITEVDPVTPKSVTPEPPRTERKLADFDLGQDTPATSRDPFPQHHAEDEVHPKMDHAEDEVHPEMDHAEDEVHPEIEKPDHYDQHNVENEADEVINNTENNAQEDPKWWDSESQNLLDSQQLVEGLSLCDDLLQSQSPIRTGHENGEPARVKPRLADYAKLGPE…
Prupe.1G314000.1.p	1.14492	0.0526262	0.0292417	0.335591	Up	XP_020418332.1	zinc finger protein GIS3 [Prunus persica]	47.79	4e-56	sp|Q9C9H1|GIS3_ARATH	Zinc finger protein GIS3 OS=Arabidopsis thaliana GN=GIS3 PE=1 SV=1	-	-	-	-	-	-	-	K10773|1|9e-15|78.6|egu:105039152|endonuclease III [EC:4.2.99.18]		GO:0003676//nucleic acid binding	-	MHNSPYIPISFSLSLSLSLSLSSAPLITSIEFPSFFLCFLSVSVPVSKKTSNMAEAAELHYQPKPTNTTNPTSSSNNPTTRLKLFGFNVQDDDLESSVLDSTKTSTPSGSPESGGFSTTGDRKYECQYCCREFANSQALGGHQNAHKKERQQLKRAQLQASRNAAVSYARNPIISAFAPPPHLLAPAGSVMVPAAAPASPSWVYVPRAATPFHVSHGCVFPAAANHGRGAGSYSYGGSIADSTLTSSMGPHHQVLQQGRAHGRADGPSLSRFTKGDGGPSFDDALGLDLHLSL
Prupe.1G328600.1.p	3.76449	1.27414	0.0417809	0.372586	Up	XP_007226522.1	MLP-like protein 31 [Prunus persica]	58.39	9e-60	sp|Q941R6|MLP31_ARATH	MLP-like protein 31 OS=Arabidopsis thaliana GN=MLP31 PE=2 SV=2	-	-	-	-	-	-	-	-	GO:0006952//defense response;GO:0009607//response to biotic stimulus	-	-	MSYAGKVDTDVEIKAPAVKFHEFFSQRPHHLSSISSDKIKGCDLHDGDWGKVGSVVNWNYVHDGKAKVAKVVFDAIDDEKNSITLRVVEGNLLEHYKSFKITVQATPKGEGSVVHWTFEYEKVHGDVTDPHTLLQLAVDLTTDIGAHLTA
Prupe.1G349400.1.p	10.4132	7.4659	2.3332e-05	0.000118828	Up	XP_007222700.1	F-box/LRR-repeat protein 4 [Prunus persica]	32.99	3e-37	sp|Q9C5D2|FBL4_ARATH	F-box/LRR-repeat protein 4 OS=Arabidopsis thaliana GN=FBL4 PE=2 SV=1	At5g23340	615	0	KOG1947	Leucine rich repeat proteins, some proteins contain F-box	R	General function prediction only	K10268|1|0.0|825|pper:18788316|F-box and leucine-rich repeat protein 2/20	-	-	-	MASSADSSSITVCINEALTDDELRSVLAKLESQRDKEVFGLVCKRWLHLQSTERKRLSARAGPHMLRRMADRFSRLHELDLSQSISRSFYPGVIDSDLRVIAHGFKCLRVLNLQNCKGISDSGVLFVGSGLSSLQSLDVSYCRKLTDKGLSAVAEGCSDLRSLYLAGCRFVTDGLLRALSKNCHYLEELGLQGCTNITDSGLTDLVNGCQQIKFLDINKCSNIGDIGVSSVSMACSSSLKTLKLLDCYKIGDESILSLARFCKNLETLVVGGCRDISDASIKLLAISCKSNLKNLRMDWCLNITDSSLSCILAQCRNLEALDIGCCEEVTDAAFHGLNGEENELSLKVLKVSNCPKITVTGIGMLLDKCDSLEYLDVRSCPHITKAGCDEAGLQFSESC…
Prupe.1G353200.1.p	10.4537	7.67825	0.0017852	0.00486362	Up	XP_007222963.2	WAT1-related protein At4g19185 [Prunus persica]	72.61	0	sp|Q8W4R9|WTR35_ARATH	WAT1-related protein At4g19185 OS=Arabidopsis thaliana GN=At4g19185 PE=2 SV=1	-	-	-	-	-	-	-	K17500|1|3e-68|231|nta:107765414|integrin-linked kinase-associated serine/threonine phosphatase 2C [EC:3.1.3.16]	-	-	-	MAAVSMAGAGVIGVGGGDVWRAHAAMAVVQLFNGGYHVITKVALNVGINQLVFCVFRDLLALAILAPIAYVREKRIRQPMNRRLFMSFFFLGLSGIFGNQLLFLIGLGYTNPTYAAAIQPAIPVFTFILAVLMGTERVNLLRTEGQAKVGGTLVCVFGAILMVLFRGPVLIGYIEPDFAAQNEISARGQPEPAGWLMSSFLQFGLDHFHLGVLCLLGNCMCMAAFLAIQAPLLKRYPANLSVTAYSYFFGALLMVVTALFMTNESTDWSLTQSELFAVIYAGTVASALNYGLLTWSNKILGPALVALYNPLQPAASAFLSRIFLGSPIYLGSVLGGLLIIAGLYVVTWASLRERQAAPDVMPHVARASEPLIHKDATINKIPYQRGLIFSGPSNSLPKS…
Prupe.1G353900.1.p	1.12736	0.190662	0.000356534	0.173714	Up	XP_007223901.1	small nuclear ribonucleoprotein SmD3b [Prunus persica]	87.12	5e-73	sp|Q9LM92|SMD3B_ARATH	Small nuclear ribonucleoprotein SmD3b OS=Arabidopsis thaliana GN=SMD3B PE=2 SV=1	At1g20580	214	9e-73	KOG3172	Small nuclear ribonucleoprotein Sm D3	A	RNA processing and modification	K11088|1|3e-93|268|pavi:110753590|small nuclear ribonucleoprotein D3	GO:0000387//spliceosomal snRNP assembly		GO:0019013//viral nucleocapsid;GO:0005681//spliceosomal complex	MSRSLGIPVKLLHEASGHVVTVELKSGELYRGSMVECEDNWNCQLENITYTAKDGKVSQLEHVFIRGSKVRFMVIPDMLKNAPMFKRLDSRIKGKGASLGVGRGRAVAMRAKAQAAGRGTAGRGVVPPVRR
Prupe.1G357500.1.p	1.09584	0.214281	0.000913916	0.187839	Up	XP_007227012.1	prolyl endopeptidase isoform X2 [Prunus persica]	30.77	3e-07	sp|Q338C0|AARE2_ORYSJ	Acylamino-acid-releasing enzyme 2 OS=Oryza sativa subsp. japonica GN=Os10g0415800 PE=3 SV=1	At1g76140	1199	0	KOG2237	Predicted serine protease	O	Posttranslational modification, protein turnover, chaperones	K01322|1|0.0|1722|pper:18788971|prolyl oligopeptidase [EC:3.4.21.26]		GO:0004252//serine-type endopeptidase activity;GO:0070008//serine-type exopeptidase activity	-	MLSYARHANAITPRLPTNHAPFLSLLNTTSNTSSSHSSSSSSSSSSVGIGRRLVFAQTQPPSISISSPLKSLRFLSRNVNKKKRSSVRSLSFLSKPRMGSLCALDVPLQYPRVRRDESVIDDYHGVKIADPYRWLEDPHSEETKDFVQKQVELTQSVLKECDTRGKLSEKITKLFDHPRYDPPYREGNKYFYSHNTGLQAQNVIYVQDSLDGEPEVLLDPNTLSEDGTVSLNTHSVSKDAKYMAYALSTSGSDWVTIKVMRVEDKKIEPDTLSWVKFSGISWTHDNKGFFYSRYPAPKEGKDIDAGTETNANLYHEVYYHFVGTDQSKDILCWKDPENPKYLFGATVTADGKYIILSIDEGCDPVNKFYYCDMSALPNGLEGLREKNDLLPVLKLIDTF…
Prupe.1G359200.1.p	1.15345	0.408642	0.0224028	0.313243	Up	XP_020423207.1	24-methylenesterol C-methyltransferase 2 [Prunus persica]	87.78	0	sp|Q39227|SMT2_ARATH	24-methylenesterol C-methyltransferase 2 OS=Arabidopsis thaliana GN=SMT2 PE=1 SV=2	At1g20330	684	0	KOG1269	SAM-dependent methyltransferases	IR	Lipid transport and metabolism;General function prediction only	K08242|1|0.0|748|pper:18788663|24-methylenesterol C-methyltransferase [EC:2.1.1.143]	GO:0006694//steroid biosynthetic process	GO:0008168//methyltransferase activity	-	MDSLTLFCTGALLAGGLYWFVCILGPAEQKGKRAVDLSGGSISAEKVQDNYDKYWSFFRRPKEIETAEKVPDFVDTFYNLVTDIYEWGWGQSFHFSPSLPGKSHRDATRLHEEMAVDLIDVKPGDRILDVGCGVGGPMRAIAAHSRANVVGITINEYQVKRARLHNKKAGLDSLCEVVCGNFLEMPFPENSFDGAYSIEATCHAPKLEEVYAEIFRVLKPGSLYVSYEWVTTDKYMGDDAEHVEVIQGIERGDALPGLRSYVDIAETARKVGFEVVKERDLAKPPAEPWWTRLKMGRIAYWRNHILVTVLAAIGVAPKGTVDVHEMLFKTADYLTRGGESGIFTPMHMILCRKPETPKSS
Prupe.1G362100.1.p	-10.2732	6.78156	2.56867e-05	0.000118828	Down	XP_020420924.1	GDSL esterase/lipase EXL3-like [Prunus persica]	61.93	3e-159	sp|Q94CH6|EXL3_ARATH	GDSL esterase/lipase EXL3 OS=Arabidopsis thaliana GN=EXL3 PE=2 SV=1	-	-	-	-	-	-	-	K00679|1|5e-86|285|cic:CICLE_v10027727mg|phospholipid:diacylglycerol acyltransferase [EC:2.3.1.158]!K14209|2|5e-84|276|ats:109773794|solute carrier family 36 (proton-coupled amino acid transporter)!K10691|3|9e-72|248|ats:109762802|E3 ubiquitin-protein ligase UBR4 [EC:2.3.2.27]!K01188|4|6e-59|209|aly:ARALYDRAFT_316517|beta-glucosidase [EC:3.2.1.21]!K01206|5|3e-28|118|cic:CICLE_v10031741mg|alpha-L-…	GO:0006629//lipid metabolic process	GO:0016298//lipase activity	-	MGVGFFFMEFSSSSSSQSKSQLIVYVCLVVFGLFHYPTITVEAAVKLPPGQTIPAVIVFGDSIMDTGNNNNLKSLIKCNFSPYGRDFQGHKPTGRFGNGKVPSDFIVEELGIKKYLPAYLDPSLRPEDLATGVCFASGGTGYDPMTPQIASVISLSDQLSMFKEYIGKLKGIVGEERTNFILSNALFLVVAGSDDLANTYFTIRARKAQYDVPAYTDLMVNSASSFVKELYGLGARRIGLFSAPPIGCVPSQRTLGGGLARDCAEEYNEAAKLFNAKLSRSLNSLNTALPNSRVVYVDVYNPLLDIILNPAKTGFKVAEKGCCGTGIIEVAVLCNKYDATCANANDYVFWDSYHPTERTYSVLIPPLLRRYVNDFLLGN
Prupe.1G362900.1.p	-1.20341	0.485265	0.0381178	0.358953	Down	XP_007223496.1	rac-like GTP-binding protein 5 [Prunus persica]	92.89	4e-130	sp|O04369|RAC1_LOTJA	Rac-like GTP-binding protein RAC1 OS=Lotus japonicus GN=RAC1 PE=2 SV=1	At4g35020	353	1e-125	KOG0393	Ras-related small GTPase, Rho type	R	General function prediction only	K04392|1|1e-146|409|pper:18792458|Ras-related C3 botulinum toxin substrate 1	GO:0007264//small GTPase mediated signal transduction	GO:0003924//GTPase activity;GO:0005525//GTP binding	GO:0016020//membrane;GO:0005622//intracellular	MSASRFIKCVTVGDGAVGKTCMLISYTSNTFPTDYVPTVFDNFSANVVVDGSTVNLALWDTAGQEDYNRLRPLSYRGADVFILAFSLISKASYENVAKKWIPELQHYAPGVPIILVGTKLDLRDDKQFFIDHSGAVPINTTQGEEMRKLIGAPAYIECSSKTQQNVKAVFDAAIKVVLQPPKQKKKKRKGQKACSIL
Prupe.1G367700.1.p	1.01169	0.338853	0.0174497	0.29077	Up	XP_007222659.1	ATP sulfurylase 2 [Prunus persica]	75.26	0	sp|Q43870|APS2_ARATH	ATP sulfurylase 2 OS=Arabidopsis thaliana GN=APS2 PE=1 SV=1	At1g19920	751	0	KOG0636	ATP sulfurylase (sulfate adenylyltransferase)	P	Inorganic ion transport and metabolism	K13811|1|0.0|998|pper:18791800|3'-phosphoadenosine 5'-phosphosulfate synthase [EC:2.7.7.4 2.7.1.25]	GO:0000103//sulfate assimilation	GO:0004781//sulfate adenylyltransferase (ATP) activity	-	MSLTIKLHVTTSYLNLNLNTSKNTTKVANFKVKLRTKPIYHCDPLLSVVSNTSAMHASALPGQPAIRSSLIDPDGGALVDLVVPESKKASKALEAESLPKVNLTKVDLEWVHVISEGWASPLRGFMREDQYLQSLHFNSLRTQDGSLVNMSLPIVLAIDDETKERIGSSPNVGLLGPNGDLIGILSSIEIYKHNKEERIARTWGSTAPGLPYVEEAITPAGNWLIGGDLEVLEHIKYNDGLDHYRLSPQQLRKEFDRRQADAVFAFQLRNPVHNGHALLMNDTRRRLLEMGYKNPILLLHPLGGFTKPDDVPLDVRMEQHSKVLEDGVLDPETTIVGIFPSPMHYAGPTEVQWHAKARINAGANFYIVGRDPAGMGHPTEKRDLYDPDHGKKVLSMAPG…
Prupe.1G369200.1.p	1.02449	0.3046	0.00988179	0.265737	Up	XP_020410902.1	protein RCC2 homolog isoform X1 [Prunus persica]	30.47	3e-36	sp|Q9FN03|UVR8_ARATH	Ultraviolet-B receptor UVR8 OS=Arabidopsis thaliana GN=UVR8 PE=1 SV=1	At1g19880	748	0	KOG1427	Uncharacterized conserved protein, contains RCC1 domain	S	Function unknown	K10614|1|6e-34|136|ccav:112502750|E3 ubiquitin-protein ligase HERC3 [EC:2.3.2.26]	-	-	-	MSAVQVEKKVEEEESKNVEKSGELLFCGGTSWDVIGRRKGAVEGNLISPTRLRPLVGIDIRFVASGCSSCHCVALDVEGRCYTWGRNEKGQLGHGDSIQRDRPTVVSELSKHKVVRAASGRSHSVVITEDGYSFAFGWNKHGQLGSGSAKNEIEKSPVRCQVSDVKNTACGADFTVWLSCVEGASILYGLQTAGLPQYGQLGHGTDNEYNTKDSSVRLAYEAQPRPKAITSLAGETIVKVACGTNHTVAVDANGYVYTWGFGGYGRLGHREQKDEWAPRRVDVFQRQNLLPPDAVLSAGSVNSACTAGGGQLYMWGKIKTTGDDWMYPKPLMDLSGWNLRCMDSGNMHHFVGADSSCISWGHAQYGELGYGPNGQKSSAVPKKVEILDGMHVMSVACGM…
Prupe.1G371800.1.p	1.01324	0.379893	0.0284871	0.331548	Up	XP_007222734.1	protein WALLS ARE THIN 1 [Prunus persica]	72.4	0	sp|Q94AP3|WAT1_ARATH	Protein WALLS ARE THIN 1 OS=Arabidopsis thaliana GN=WAT1 PE=1 SV=1	-	-	-	-	-	-	-	K17500|1|2e-144|429|nto:104085001|integrin-linked kinase-associated serine/threonine phosphatase 2C [EC:3.1.3.16]		GO:0022857//transmembrane transporter activity	GO:0016021//integral component of membrane	MADAVGSASAKRMCCSVPERLQLHGAMLALQFGYAGFHVVSRAALNMGISKLVFPVYRNIIALLMLLPFAYFLEKKDRPAITLNFLVQFFLLALIGITANQGFYLLGLDNTSPTFASAIQNSVPAITFLMAAVLRIEHVRLNRKDGIAKVIGTIFCVAGASVITLYKGPTIYSPTPPLQMMRLMGNATSIVSSSSSLSSSSSSSAIMSTLGDANGKSWTLGCLYLIGHCLSWSGWLVFQAPVLKKYPARLSVTSYTCFFGLIQFIVIAAIFERDAQAWIFHNGGEVFSILYAGVVASGIAFAVQIWCIDRGGPVFVAVYQPVQTLVVAIMASVALGEEFYLGGIIGAVLIIVGLYLVLWGKNEERKFGLIAQANSRAGILSTPEHANNRKSQAKTSLTQ…
Prupe.1G372600.1.p	10.4671	7.78576	0.0474153	0.0837025	Up	XP_007222182.1	uncharacterized protein LOC18789805 [Prunus persica]	-	-	-	-	At1g75460	357	1e-124	KOG4159	Predicted E3 ubiquitin ligase	O	Posttranslational modification, protein turnover, chaperones	-	-	-	-	MALPQLIPSSSSSLHHKPIFNPNPIPSPLNPNPNFLSPRLRRSHHHRRQRPGSLKCSASSFSERHPTNQPKSDDVVELPLFPLPLVLFPGAILPLQIFEFRYRMMMHSLLQTDLRFGVIYSDAVSGTSDVGCVGEIVKHERLVDDRFFLICKGQERFRVTDLVRTKPYLVAEVKWLEDRPSNDGDEDLEALANEVESYMKDVIRLSNRLGGKPEKDVQDLRRNLFPTPFSFFVGSTFEGAPREQQALLELEDTAARLKREKETLRNTLNYLTAASAVKDVFPST
Prupe.1G376800.1.p	1.05872	0.284903	0.00989832	0.265737	Up	XP_007222771.1	uncharacterized protein LOC18789808 isoform X1 [Prunus persica]	27.04	4e-17	sp|O49923|ADK_PHYPA	Adenosine kinase OS=Physcomitrella patens subsp. patens GN=ADK PE=2 SV=1	At1g19600	527	0	KOG2854	Possible pfkB family carbohydrate kinase	G	Carbohydrate transport and metabolism	K11883|1|2e-45|170|boe:106316952|RNA-binding protein NOB1!K08819|2|6e-37|144|vvi:104879100|cyclin-dependent kinase 12/13 [EC:2.7.11.22 2.7.11.23]!K00856|3|1e-17|87.8|smo:SELMODRAFT_154567|adenosine kinase [EC:2.7.1.20]	-	-	-	MTSKNFKCEERARAKSQFPKTRARGPKMGAEALPVTANSNNNCSGGEAPLVLGLQASALVDHVARVDWSLLDQLPGERGGSIPVAIEELEHILGEVKTHIISSPDDSLPMKTIAGGSVANTIRGLSAGFGISCGIIGACGDDEQGQLFVSNMSSHAVSLSRLRMKKGPTAQCVCLVDALGNRTMRPCLSSAVKLHPQNYVIQADDLTRADFKGCKWLLLRYGIINLEVIQAAIRIAKQEGLFVSMDLASFEMVRNFRSPLLQLLESGGIDLCFANEDEATELLRCTEGEQKADPEAALEFLAKHCRWAVVTLGPNGCIAKHGKEIVRVPAIGKANAVDATGAGDLFASGFLYGLVKGLSLEECCKVGSCSGGSVIRSLGGEVTPENWQWMYKQMQTKGL…
Prupe.1G380600.1.p	1.15501	0.49226	0.0469484	0.385196	Up	ONI32701.1	hypothetical protein PRUPE_1G380600 [Prunus persica]	80.49	1e-90	sp|Q9STG6|DUT_ARATH	Deoxyuridine 5'-triphosphate nucleotidohydrolase OS=Arabidopsis thaliana GN=DUT PE=1 SV=1	At3g46940	265	2e-90	KOG3370	dUTPase	F	Nucleotide transport and metabolism	K01520|1|6e-164|456|pper:18788336|dUTP pyrophosphatase [EC:3.6.1.23]	-	-	-	MMLEVVQEKGVERRPFTCLRTTLVIRTYITMAGKLFITRETPFLAGLSLFKRTPSSYLLLKPGICKYSHHRRPLSQLLRMAPQDVQNGNHEVKEPTPKIAKLHENSDVSGNPTFFFRVKKLSEKAVLPSRGSPLSAGYDLSSATETKVPARGKALVPTDLSIAVPEGTYARIAPRSGLAWKHSINVGAGVIDADYRGSVGVILFNHSDVDFEIKEGDRIAQLIIEKIITPDVVEVEDLDLTARGNGGFGSTGV
Prupe.1G381900.1.p	1.04672	0.327523	0.0330309	0.348869	Up	ONI32720.1	hypothetical protein PRUPE_1G381900 [Prunus persica]	43.97	2e-161	sp|O48786|C734A_ARATH	Cytochrome P450 734A1 OS=Arabidopsis thaliana GN=CYP734A1 PE=2 SV=1	At1g75130	596	0	KOG0157	Cytochrome P450 CYP4/CYP19/CYP26 subfamilies	QI	Secondary metabolites biosynthesis, transport and catabolism;Lipid transport and metabolism	K14999|1|0.0|615|dcr:108221833|cytochrome P450 family 6 [EC:1.14.-.-]!K15639|3|0.0|590|atr:18445882|PHYB activation tagged suppressor 1 [EC:1.14.-.-]		GO:0004497//monooxygenase activity;GO:0016705//oxidoreductase activity, acting on paired donors, with incorporation or reduction of molecular oxygen;GO:0005506//iron ion binding;GO:0020037//heme binding	-	MSFKIMHLVLLVLLVPPLILLFKFVCSTIWVPLRTQRHFQKQGIRGPPYRPIFGNSAEIRRLFAEAQSKRSAFDHDILQRASPFYHRWSRMYGKNFLYWFGPKPRLAIADPHMIKEVLMNTSGSFEKIPFTPLTKILFGEGLVGLEGDQWAFHRRVVNQAFKMEKVKGWVPEIVASTMKMLEKWEDVRGGRDEFEMDVHKELHELSADIISRTAFGSSFEEGKRVFNLQEQQMHLFSKAVRSIYIPGFRFLPTKNNRERWRLDKETRESIRMLIVNNRKTREDSRNLLSLLLSSYKNQDGEEEKLEIQEVIDECKTFYFAGKETTANLLTWALLLLALHPEWQSKAREEVNCACGSNKLPVAENLNDLKIVSMIVNETLRLYPPAVMLMRQTSNKVKLG…
Prupe.1G386000.1.p	10.5408	8.15865	0.000118525	0.00043168	Up	XP_008220734.1	PREDICTED: cytochrome c oxidase assembly factor 5 [Prunus mume]	-	-	-	-	CE21412	53.9	6e-11	KOG4114	Cytochrome c oxidase assembly protein PET191	O	Posttranslational modification, protein turnover, chaperones	K18178|1|2e-45|143|pavi:110762635|cytochrome c oxidase assembly factor 5	-	-	-	MAKSCKGLAMELVKCLSECDCVKVEKRSYRECAGEKSPSISSECIGLRETYFNCKRGQVDMRARIRGNKGY
Prupe.1G401000.1.p	10.2075	6.47295	2.69115e-05	0.000118828	Up	XP_007223115.2	ubiquitin carboxyl-terminal hydrolase 18 [Prunus persica]	63.34	0	sp|Q67XW5|UBP18_ARATH	Ubiquitin carboxyl-terminal hydrolase 18 OS=Arabidopsis thaliana GN=UBP18 PE=2 SV=2	At4g31670	674	0	KOG1865	Ubiquitin carboxyl-terminal hydrolase	O	Posttranslational modification, protein turnover, chaperones	K11855|1|0.0|1459|pper:18790652|ubiquitin carboxyl-terminal hydrolase 36/42 [EC:3.4.19.12]	-	-	-	MHVAGVSLDLNWFLQFIFTAFIIAFGLLHFVKNTASKYFEVDANFEGGDHSDRTQMPGALMEDPVCAVCGNSGPKKCSRCKAVRYCSQKCQEKHWKSGHKTECKNTLSNSRFKTSGGGGKTFSGLALVPIRGISKHIKKPKEILFPYDEFVQLFNWDKLRFPPCGLLNCGNSCFANVVLQCLSSTRPLVAYLLEKGHRRECICEDWCFLCEFQTHLERASQSSQAFSPTNIISRLPNIGGNLVHGRQEDAHELMRFAIDTMQSVCLSEFGGEKAVHPSTQETTIIQHIFGGLLQSQVICTKCKNISNRYDNMMDLTVEIHGDASSLEECLDQFTIKEWLDGENKYKCDGCNDYVKAWKRLTVKRAPNILTIALKRFQSGRFGKINKRVTFPETLDLNPY…
Prupe.1G407100.1.p	-10.3053	6.9343	2.51208e-05	0.000118828	Down	XP_007226737.1	17.6 kDa class II heat shock protein [Prunus persica]	70.78	2e-61	sp|P29830|HS176_ARATH	17.6 kDa class II heat shock protein OS=Arabidopsis thaliana GN=HSP17.6 PE=2 SV=1	At5g12020	187	3e-61	KOG0710	Molecular chaperone (small heat-shock protein Hsp26/Hsp42)	O	Posttranslational modification, protein turnover, chaperones	K13993|1|2e-113|322|pper:18789402|HSP20 family protein	-	-	-	MDLRNAGNIFAVLEDMLDLAEQEPEKPRNNNRNNNNPSRAYVRDAKAMAATPADVVEYPNAYVFVVDMPGIEAGQIKVQVENDNVLVLSGERRREEEIKESGVKYVRMERRVGKFMRKFVLPENANLDAISAVAKDGVLTVRVEKLPPPEPKRPKTIHVNVA
Prupe.1G418900.1.p	10.3766	7.27944	7.43254e-05	0.000279528	Up	XP_007222501.1	RNA-binding protein 1 [Prunus persica]	46.74	2e-68	sp|Q9C652|RBP1_ARATH	RNA-binding protein 1 OS=Arabidopsis thaliana GN=RBP1 PE=2 SV=1	At1g58470	218	5e-68	KOG0118	FOG: RRM domain	R	General function prediction only	K14411|1|0.0|687|pper:18789368|RNA-binding protein Musashi		GO:0003723//RNA binding	-	MDSDQAKLFVGGISRETSEETLKYHFRSYGTVVGSVIAKDRGTNNPRGFGFVWFSDSSSADKALEDPHVILGRRVDVKKAIPRNEHQSTWLSRSSSRSFENSNNQFRTRKIFVGGLSANLTEEGFKDYFEKFGSVTDVVVMYDNTTRRPRGFGFVTFASEDAVENVMQQSFHELNGRFVEVKKAVPKEENNSNDSGYAPVNYPPYTYSPTPTYGILPSPTPYNGFGPFMYGTSVYGGWYPTGGSGGIPYGIAPIAPQAWMFPYGNSLYPSYMRGGGLVAGGYSGILGHGAVGGISNQVVFGNGQAPASVKSSRVEAEKLDVDSGSNSAGLKKRNSKRS
Prupe.1G424300.1.p	10.5405	8.15479	2.13608e-05	0.000118828	Up	XP_007222874.1	zinc finger protein ZAT10 [Prunus persica]	47.15	7e-62	sp|Q96289|ZAT10_ARATH	Zinc finger protein ZAT10 OS=Arabidopsis thaliana GN=ZAT10 PE=2 SV=1	At1g27730	194	1e-61	KOG1721	FOG: Zn-finger	R	General function prediction only	K22534|1|1e-11|68.9|fve:101303190|PR domain zinc finger protein 5		GO:0003676//nucleic acid binding	-	MALQALNSPTTAGASPFRFEEAASKINYVEPWTKRKRSKRPRLDSPSTEEEYLALCLIMLARGGSGSTSAATTATNSAASHHMITQSPSNASHQEPSTSAQPPKLSYKCSVCNKAFPSYQALGGHKASHRKGAAGSAAEGPSTSSNTTTSGTTTVTASGRTHECSICHKSFPTGQALGGHKRCHYEGGVGASTATATATTTSAVTSSEGVGSTSHQAVSHGHRETFDLNMPALPEFSRDFFLCGEDEVESPHPAKKPRILTIMKPKQEISQN
Prupe.1G426300.1.p	-1.04001	0.269798	0.00484467	0.240663	Down	ONI33466.1	hypothetical protein PRUPE_1G426300 [Prunus persica]	73.16	0	sp|Q9STX2|VEP1_ARATH	3-oxo-Delta(4,5)-steroid 5-beta-reductase OS=Arabidopsis thaliana GN=VEP1 PE=1 SV=1	-	-	-	-	-	-	-	K22419|1|0.0|817|pper:18789471|Delta4-3-oxosteroid 5beta-reductase [EC:1.3.1.3]	-	-	-	MSWWWARAVADAKKKYQGVDTSAPQGQRSVGLVIGVTGIVGNSLAEILPRPDTPGGPWKVYGVARRPRPKWNADHPVDYIQCDISDPEDTKAKLSKLTDVTHLFYVSWAHKATEVENCEANGAMLRNVLGVVIPVAPNIRHVSLQTGTKHYIGPFESFGKIKAHDPPFTEDLPRLDVSNFYYTQEDILFDEAKKKEGLSWSVHRPNTIFGFSPYSLMNVIGTLCVYAAICKHEKKPLKFPGSKAAWNCFSVASDADLIAEQHIWAAVDPYAKNEAFNVNNGDVFKWKHVWKVLAEQFGIEEYGIDEEEGERRLSLVEMMKGKGGVWEEIVKKNKLQPTKLEEVGVWWFADIVLCVESALDSMNKSKEHGFLGFRNSQESFTSWVQKMKAYKIVP
Prupe.1G429800.1.p	3.38517	0.298659	0.00769404	0.261379	Up	XP_007227378.1	putative receptor protein kinase ZmPK1 [Prunus persica]	39.88	0	sp|P17801|KPRO_MAIZE	Putative receptor protein kinase ZmPK1 OS=Zea mays GN=PK1 PE=2 SV=2	At5g38560	231	3e-65	KOG1187	Serine/threonine protein kinase	T	Signal transduction mechanisms	K04733|1|0.0|1598|pavi:110761926|interleukin-1 receptor-associated kinase 4 [EC:2.7.11.1]	GO:0048544//recognition of pollen	GO:0004674//protein serine/threonine kinase activity;GO:0005524//ATP binding	-	MDAYMVFLFLLLTLFSQLGSSASYSTMSMGSSLSVENPADILISPNGMFSAGFFQVGENAYCFAIWFTEPSPTHNLTVVWMANRDEPVNGRSSKLTLQKNGNLILTDAGKSTIWSSNTVSASLAQLRLNDTGNLVLLTVKGVALWESFASPTDTLLPHQPLTRNTKLLSSRSLTNYSSGFYSLFFDNDNTLRLLYDGPEVSSIYWPDPWLLSIQAGRSTYNNSRIAKFDNLGNFSASDDFTILSSDYGAKRQRIVKMDADGNVRMYSRKQPGDTWVVTWEAVLQPCKIHGICGANSWCNYVPSFGRKCSCVPGYVIRNKNDWIYGCQPEFNLSHNNSIAARDQFDFMFIPRVEIYGFDFGIFYNYTWEKCKNFCLDLGNCTGFHFKYDSGGGGFYNCFP…
Prupe.1G433300.1.p	-10.3501	7.15355	0.00542237	0.0128503	Down	XP_007221958.1	subtilisin-like protease SBT1.9 [Prunus persica]	47.03	0	sp|Q9FHA4|SBT19_ARATH	Subtilisin-like protease SBT1.9 OS=Arabidopsis thaliana GN=SBT1.9 PE=2 SV=1	-	-	-	-	-	-	-	K15333|1|2e-91|319|nsy:104224633|tRNA guanosine-2'-O-methyltransferase [EC:2.1.1.34]!K12619|2|2e-43|174|ghi:107940264|5'-3' exoribonuclease 2 [EC:3.1.13.-]!K01188|3|7e-26|116|zju:112491732|beta-glucosidase [EC:3.2.1.21]!K13199|4|1e-23|110|mtr:MTR_7g081660|plasminogen activator inhibitor 1 RNA-binding protein!K13124|5|3e-14|76.3|lsv:111889439|mitogen-activated protein kinase organizer 1		GO:0004252//serine-type endopeptidase activity	-	MAIGHHVRLCFWLAIAIISTTLAQPNNYIIHMDSTMMPKAFADHHSWYLATVNSALSKFRPNTTTTTSSSALSSKLIYSYTHVINGFSASLSLSELEALKTSPGYISSVKDLPVKPDTTHSSQFLGLSSKSGAWPVADYGKDVIIGLVDTGVWPESESFSDDGMSEIPPRWKGECESGTQFNSSLCNKKLIGARFFNKGLIAQNPNLTFPVNSTRDTDGHGTHTSSTAAGNYVPGASYFGYAPGTASGMAPKAHVAMYKALWEEGNLSSDIIAAIEQAIIDGVDVLSLSFGLDGVALYEDPVAIATFSALEKGVFVSTSAGNEGPFFGTLHNGIPWVLTVAAAIIDRDFEGTAHFGNGGSVTGSTLFPGNSSSTQFPIVFLDACDSLKKLKQVGKKIVV…
Prupe.1G448100.1.p	1.86969	0.719843	0.0317482	0.342741	Up	XP_007225376.1	uncharacterized protein LOC18791608 [Prunus persica]	-	-	-	-	-	-	-	-	-	-	-	-	-	-	-	MAHLFRDLSLGHSKRGTTATATTTTPPKTLSIPTKPITAMATDLPSPLGQLSAQLTDSDLRLTAYEIFVAACRTSTGKALTFTSSSASSHLDSPTQHANSPNGSPALQRSLTSAAASKMKKALGLKSPGSGSKKSPGSGGSGSGPGKPKRVMTVGELMRIQMGISDAMDSRVRRALLRISASQVGRRIESVVVPLELLQQLKSSDFTDKQEYDAWQKRTLKILEAGLLLHPHLPLDKSNNTAQRLRQIIHGALDRPFETGINNETMQVLRSAVTTLASRSSDGLYDSSHWADGLPLNLRLYERLLEACFDLHDETSVIDEVDELMEHIKKTWTILGMNQMLHNLCFTWVLFHRFVATGQVELDLLYAADSQLAEVAKDSKATKDPEYCKILSSTLTSIL…
Prupe.1G455400.1.p	10.4327	7.56714	2.30198e-05	0.000118828	Up	XP_007222990.2	glycosyltransferase family protein 64 C3 [Prunus persica]	66.77	2e-144	sp|Q9C975|GT643_ARATH	Glycosyltransferase family protein 64 C3 OS=Arabidopsis thaliana GN=At1g80290 PE=2 SV=1	At1g80290	411	5e-144	KOG1021	Acetylglucosaminyltransferase EXT1/exostosin 1	GMW	Carbohydrate transport and metabolism;Cell wall/membrane/envelope biogenesis;Extracellular structures	K02370|1|2e-85|265|smo:SELMODRAFT_133103|alpha-1,4-N-acetylglucosaminyltransferase EXTL3 [EC:2.4.1.223 2.4.1.224]!K02367|4|3e-32|127|jcu:105646528|glucuronyl/N-acetylglucosaminyl transferase EXT2 [EC:2.4.1.224 2.4.1.225]		GO:0001888//glucuronyl-galactosyl-proteoglycan 4-alpha-N-acetylglucosaminyltransferase activity;GO:0016757//transferase activity, transferring glycosyl groups	GO:0016021//integral component of membrane	MSQKTKGYLEMYSLPTNFVILMFLFFFYFGDVLVLSLRTLSMDPCNPTAQQEPQTLISDQLTVLINGYSESRIPLLQSIIASYAASSLVSSILVLWGNPSTPSQTLAQLAHNLTQSSFGFNGISVIRQTSDSLNNRFLPRPSIKTRAVLICDDDVEVDPKSFEFAFKMWGSNPDRLVGFFVRSHDIDLSKKEWIYTIHPDKYSIMLTKFMLLKSEYLFRYSCAGGPVMAHMRRIVDKMNNCEDILMNFVVADEVNSGPILVGAERVRDWGDARNDHDDDDGNGRHRLIGEVAQVGLSSRKGKHRKRRGECIGEFHRVLGRMPLRFSYGKVVNSVGEQGLCQKGGKLVFCDQS
Prupe.1G461600.1.p	10.2071	6.47126	0.000258446	0.000851641	Up	XP_020410248.1	flowering-promoting factor 1 [Prunus persica]	78.7	2e-58	sp|O23624|FPF1_ARATH	Flowering-promoting factor 1 OS=Arabidopsis thaliana GN=FPF1 PE=2 SV=1	-	-	-	-	-	-	-	K14416|1|3e-47|164|aly:ARALYDRAFT_325603|elongation factor 1 alpha-like protein	-	-	-	MSGVWVFKNGVIRLVENPQAETSSRKKALVHLPSGQVVSSYSTLEQILTGLGWERYYGGDPDLFQFHKRSSIDLISLPRDFSKFNSVYMYDIVIKNPNIFHVRDM
Prupe.1G482000.1.p	-10.4827	7.84236	2.22119e-05	0.000118828	Down	XP_020421414.1	ATP synthase subunit b', chloroplastic [Prunus persica]	66.84	2e-77	sp|P31853|ATPX_SPIOL	ATP synthase subunit b', chloroplastic OS=Spinacia oleracea GN=ATPG PE=1 SV=2	-	-	-	-	-	-	-	K02109|1|1e-149|418|pper:18788179|F-type H+-transporting ATPase subunit b	GO:0015986//ATP synthesis coupled proton transport	GO:0015078//hydrogen ion transmembrane transporter activity	GO:0045263//proton-transporting ATP synthase complex, coupling factor F(o);GO:0016021//integral component of membrane	MANMIMASSKVPISSPSPSPISKPRIPIQISIPKLPTLPKLSKSQILSLSSSLSVIAATSLSWAPPSLAEEIEKAALFDFDLTLPIQMVQFLLLMVALDKLYYSPLGKFMDERDAAIREKLGSVKDTSEEVKQLEQQGIAIMRAARAEISAALTKMKKETQGEVEQKLTEGRKKVEAELQEALNKLEEQKEETIKALDSQIANLSDQIVKKVLPL
Prupe.1G489600.3.p	10.734	9.32651	1.86769e-05	0.000118828	Up	XP_020409740.1	ubinuclein-1 isoform X2 [Prunus persica]	-	-	-	-	-	-	-	-	-	-	-	K17492|1|1e-150|462|atr:18436888|ubinuclein	-	-	-	MEEEKGGGESSRASSKFVKAGDRQMFTVELRPGETTIVSWKKLLKDTNKVNGPSTSSAPEPPPANAHPALESRIAPVQQLSGDEVKDEAAPHRFSAVIEKIERLYMGKDSSDDEDLNDIPDDDQYDTEDSFIDDAELDEYFEVDNSAIKHDGFFVNRGKLERIVPAALPNQQPKKRRRKEVKGPGENDDSHVPNKHAKVGKTASAKITSTLVKNSSAPIQTVTVPTEHSEDVKFQNQLNVCGLSSTKKSTDSKTILDPSLLKVSEGDAAALQAEVKDMDKQKTGVLLSKDPSNRFKDAGGSSDGSYQKYHEKSAYAQTKPQSGRPSSNADEMETVRAREKNGVCEIPDLNLTDGKYAVPTTKPSHGHKRDSSSVRSKSSMLEKAITDLEKMVAESRPPA…
Prupe.1G519700.1.p	10.3112	6.9559	2.51937e-05	0.000118828	Up	XP_007225655.1	7-deoxyloganetin glucosyltransferase [Prunus persica]	66.46	0	sp|F8WKW1|UGT2_GARJA	7-deoxyloganetin glucosyltransferase OS=Gardenia jasminoides GN=UGT85A24 PE=1 SV=1	At1g22360	662	0	KOG1192	UDP-glucuronosyl and UDP-glucosyl transferase	GC	Carbohydrate transport and metabolism;Energy production and conversion	K22706|1|0.0|732|pmum:103319663|(R)-mandelonitrile beta-glucosyltransferase [EC:2.4.1.354]!K13030|3|5e-137|407|sbi:8060874|cyanohydrin beta-glucosyltransferase [EC:2.4.1.85]	GO:0008152//metabolic process	GO:0016758//transferase activity, transferring hexosyl groups	-	MSSIALTSKKSHAVFVPFPSQGHINPLMQLAKLLHYKGFHITFVNTEYNHKRLLKSRGPDALNGLPTFRFETISDGLPPTDADATQDIPSLCDSTSKHSLPHFRDLLSKLNSSPDSPRVTCLITDGVMSFTLDAAQELGVPAVFFWTPSACGFMGYVQFHQLIEKGLTPFEDASYFTNGHLNTVLDWVPGMRNIRLKDLPTFMRTTEPDDIMLNFLVGETERTKKASAVILNTFHDLEHEVIDSLSTLLPPVYSIGPLNLQLKQIPAENELKSIVSNLWTEEPECLQWLDTKEPNSVVYVNFGSIAVTTNEQLIEFAWGLANSKKKFLWVIRPDLVRGESAVVPAEFLEETKDRSLLAHWCPQEQVLSHPAVGGFLTHSGWNSTLESLCGGVPLICWSF…
Prupe.1G520800.1.p	-10.5715	8.34377	0.0138904	0.0283048	Down	XP_007222765.1	protein EXORDIUM [Prunus persica]	68.2	5e-146	sp|Q9ZPE7|EXO_ARATH	Protein EXORDIUM OS=Arabidopsis thaliana GN=EXO PE=2 SV=1	-	-	-	-	-	-	-	K00020|1|3e-25|108|mtr:MTR_8g088900|3-hydroxyisobutyrate dehydrogenase [EC:1.1.1.31]!K14299|2|4e-17|85.5|mdm:103418195|nucleoporin SEH1	-	-	-	MSAFLKLLLLISLFHFGSAARSLSETSSDQTQQPSLQFQYHNGPLLSGKFSINLIWYGNFKPSQRAIVSDFITSLASPPQSKPASGQPSVATWLKSIEKYYHLLSSKKQYSLSLSLGTQTLDDKYSLGKSLTARQIQQLASKGAQNYAINVVLTSSDVLVDGFCMSKCGSHSSSSSSSHIRGKTQKFTYIWVGNSETQCPGQCAWPFHQPIYGPQGPPLVAPNNDVGLDGMVINLASLLAGTVTNPFGNGYYQGPKEAPLEAASACTGVYGKGAYPGYAGNLLVDPTTGASYNAHGSNGKKFLLPALFDPSTSTCSTLV
Prupe.1G521200.1.p	1.09608	0.364447	0.0168773	0.287297	Up	XP_020420782.1	phospho-2-dehydro-3-deoxyheptonate aldolase 1, chloroplastic [Prunus persica]	84.34	0	sp|P27608|AROF_TOBAC	Phospho-2-dehydro-3-deoxyheptonate aldolase 1, chloroplastic OS=Nicotiana tabacum GN=DHAPS-1 PE=2 SV=1	-	-	-	-	-	-	-	K01626|1|0.0|1129|pper:18789124|3-deoxy-7-phosphoheptulonate synthase [EC:2.5.1.54]	GO:0009423//chorismate biosynthetic process;GO:0009073//aromatic amino acid family biosynthetic process	GO:0003849//3-deoxy-7-phosphoheptulonate synthase activity	GO:0009507//chloroplast	MALTSSSSLIPTKSAFIQGQGQSLLPSPRTHQPSLPIRPVRPIVAVHAAEPAKNPVVSDKPTKQQSAPTTSSPSSSAKTHNAVPAKWSVETWKSKKALQLPDYPNQEDLESVLRTIESFPPIVFAGEARSLEERIGEAAMGNAFLLQGGDCAESFKEFNANNIRDTFRILLQMGVVLMFGGQMPVVKVGRMAGQFAKPRSDAFEEKDGVKLPSYRGDNVNGDAFDLKSRTPDPQRLIRAYCQSAATLNLLRAFATGGYAAMQRVTQWNLDFTEHSEQGDRYRELASRVDEALGFMTAAGLTVDHPIMTTTEFWTSHECLLLPYEQSLTRLDSTSGLYYDCSAHMLWAGERTRQLDGAHVEFLRGVANPLGIKVSDKMDPNELVKLIEILNPQNKAGRIT…
Prupe.1G533300.1.p	10.4282	7.54866	0.0181262	0.0354331	Up	XP_020410479.1	uncharacterized protein LOC18788972 [Prunus persica]	64.45	2e-86	sp|O04492|DRB1_ARATH	Double-stranded RNA-binding protein 1 OS=Arabidopsis thaliana GN=DRB1 PE=1 SV=1	-	-	-	-	-	-	-	-	-	-	-	MATNEGFQGVSNCYVFKSQLQEYAQKVEIPTPVYETIKEGPSHEPSFKSTVIVNNVRYDSLLGFSNRKLAEQSAAEVALVELAKSGDINQSISQPIHETGLCKNLLQEYAQKMNYAIPLYQCQKEETPGRVPLFSCTVEIGGIRYVGAAAKTKKEAEIKVARTALLAIRSSKSESSMEPVGNTQLTVLPSKKRRAESNTKSEETANVPKPKKGRFKKRNFKKKLSGDMVGQTQVRNVGDMEVNVGGSEISGGGANPSVKPMDAEVTPNTHDSMSHVIPSENQTSALEPGSVPQVNTFSAKKGESTASFFNHGDYGTLDEGAFPISYGNITPLAKEVNMVSGAAEVVSLANNSNLQLFNHGDDNGTLDVEAYPISCGNLTSVAEEENMVSGAGESISLAN…
Prupe.1G542900.1.p	10.4225	7.51615	0.0112326	0.024156	Up	XP_020424666.1	protein FAM135B [Prunus persica]	-	-	-	-	At1g58350	1097	0	KOG2205	Uncharacterized conserved protein	S	Function unknown	K00940|1|2e-18|92.8|gmx:100786376|nucleoside-diphosphate kinase [EC:2.7.4.6]	-	-	-	MFRHLGWLVGLNYKSPSSKRLPDAKPPPAEVKPVAMLDSVQEIAIYIHRFHNLDLFQQGWYQIKITMRWEDSEYTSVGTPARVVQYEAPDLGSDDVYGVWRIDDTDNSFSTQPFRIKYARQDIFLSIMISFNLSLSRYEGLSSSAVILKFELLHAPILGNRSDLQASLDASPAAVHEFRIPPKALLGLHSYCPVHFDVFHAVLVDVTVHISLLKAVSYTLPSKVPSDSSIAEDVGGEGLSGSNQASAQVAAAGVNDIMLVKSLLSARDILLEELQKLSKAIDQAIDLTDFISKMDDTKFDSILQENLVAADAKVSGQGKPQNGLEKVNGTSEFGSGELLRPLSRGALLNSFHSLGDQVLYLWNTFLNFHRFNKTKVLEYLRDTWAKDRKAEWSIWMVYS…
Prupe.1G549400.1.p	-10.4698	7.77248	0.00435882	0.0109286	Down	XP_020419981.1	endo-1,3;1,4-beta-D-glucanase [Prunus persica]	41.84	3e-41	sp|Q9ZT66|E134_MAIZE	Endo-1,3;1,4-beta-D-glucanase OS=Zea mays PE=1 SV=1	At3g23600	316	7e-110	KOG3043	Predicted hydrolase related to dienelactone hydrolase	R	General function prediction only	K01061|1|1e-104|307|cqi:110717935|carboxymethylenebutenolidase [EC:3.1.1.45]	-	-	-	MAGPQCCSNPPILSPSYGVDCAEKLGGLNVYAAGSPNSKLAIVLVSDVFGYRAPNLRKLGEKVAAAGFFVVVPNFFYDDPFVYDNNRPLAVWLEDHGTDKGFEDAKSIINALKEKGYSAIGAAGFCWGGKVVTELAKSDFVQAAVLLHPSFVALDDIEGVKVPMAVLGAEIDEYSPLELLKQFEEILAAKTEIDSYVKIFPKAEHSWTVRYNVEDEEAVKRAEEAHNNMIDWFSKHVK
Prupe.1G551200.1.p	1.00918	0.40149	0.0401853	0.367293	Up	XP_007225631.1	uncharacterized protein LOC18793423 [Prunus persica]	-	-	-	-	At1g72040	583	0	KOG4235	Mitochondrial thymidine kinase 2/deoxyguanosine kinase	F	Nucleotide transport and metabolism	K00893|1|3e-116|347|brp:103853852|deoxycitidine kinase [EC:2.7.1.74]	-	-	-	MQKLLRISPSGPILCTSAKAPLSSLPLASSILSKAFKGSTDNPSRMHTAATAFRGGSALAATVHSKPTYNIPYRINCGLCRCSVHDRAPSRAWLVLKDSGLGSRPAWLHTSSDGSFSVSAAEGCKGLEKGLEGFEDLSAGDGGEAEKGSEEKPNRLSNRRQRSSGSGGLLAGNPDLLAIPGVGPRNLRKLVEKGIGGVSELKQLYRDKFFGKGSQKMVEYLQSSVGIIHKNHAESITTYIKESVDEELKEDSSNSEVKHTQKKRLTFCVEGNISVGKTTFLQRIANETLELRDLVEVVPEPINKWQDVGPDHFNILNAFYAEPQRYAYTFQNYVFVTRLMQERESSGGIKPLRLMERSVFSDRMVFVRAVHEAKWMNEMEISIYDSWFDPVVSSLPGLI…
Prupe.1G555900.5.p	-1.07487	0.428289	0.0363886	0.358953	Down	ONI35823.1	hypothetical protein PRUPE_1G555900 [Prunus persica]	75.86	0	sp|Q9ZRV4|MLH1_ARATH	DNA mismatch repair protein MLH1 OS=Arabidopsis thaliana GN=MLH1 PE=2 SV=1	At4g09140	750	0	KOG1979	DNA mismatch repair protein - MLH1 family	L	Replication, recombination and repair	K08734|1|0.0|999|pper:18793172|DNA mismatch repair protein MLH1	-	-	-	MEMEIEAEEEQVQMEPPKIHRLDDSVVNRIAAGEVIQRPVSAVKELVENSLDACSSSINVVVKDGGLKLIQVSDDGHGIRYEDLPILCERHTTSKLSTFEDLQSIKSMGFRGEALASMTYVAHVTVTTITKGQLHGYRVSYKDGVMEHEPKACAAVKGTQIMVENLFYNMTARRKTLQNSADDYSKIVDVLSRFAIHHMNVSFSCRKHGAARADVNSVATISRIDAIRSVYGVSVARCLMKVEALDKDPSSSVFQMEGFISNSNYVAKKITMVLFINDRLVDCTALKRALEIVYAATLPKASKPFIYMAIILPPEHVDVNVHPTKREVSLLNQEIIIEKIQSVVESRLRSSNETQTFQEQAVKPTPSCQMVSSNDSNRNPSPSGSKLQKVPVHKMVRTD…
Prupe.1G557500.1.p	10.1807	6.35449	0.00688498	0.0156107	Up	XP_007222696.1	alpha-(1,4)-fucosyltransferase [Prunus persica]	67.64	0	sp|Q9C8W3|FUT13_ARATH	Alpha-(1,4)-fucosyltransferase OS=Arabidopsis thaliana GN=FUT13 PE=2 SV=2	At1g71990	582	0	KOG2619	Fucosyltransferase	GE	Carbohydrate transport and metabolism;Amino acid transport and metabolism	K14412|1|0.0|867|pper:18793901|alpha-1,4-fucosyltransferase [EC:2.4.1.65]	GO:0006486//protein glycosylation	GO:0008417//fucosyltransferase activity	GO:0016021//integral component of membrane;GO:0032580//Golgi cisterna membrane	MQLKPFNSLSIAFMMGGAFLILFLCSFLEFPSISTSIQPMKDPNLSLSLTKSTPDPFTNLISAFKKWDSQVGCAHFRGKHHEALLQSQNQNGSSSSLQQVQLGIESECREPKVEHISVMVKGWTWIPDNLDNLYSCPCGLSCLWTKSSVLADKPDALLFETTTPPLQRNTGDPLRAYMDLEAGRKKSGFEDLFISYHAKDDVQCTYAGALFHNGRNYHVSSYKHNDTLVYWSSSRCLPQRNKLAYKLLSLLPHHSFGKCLNNVGGLDMALSFYPECASDASVSQKWWDHLHCAMSHYKFVLAIENTMTESYVTEKLFYALDSGAVPIYFGAPNVWDFVPPHSIIDGTKFSKLEELASYVKALANDPVAYAEYHGWRRCGVMANYVKTRALSLDTLPCRL…
Prupe.1G560700.1.p	1.54735	0.350257	0.00690636	0.251897	Up	ONI35920.1	hypothetical protein PRUPE_1G560700 [Prunus persica]	75.36	1e-33	sp|P48504|QCR6_SOLTU	Cytochrome b-c1 complex subunit 6 OS=Solanum tuberosum PE=1 SV=2	At1g15120	130	6e-41	KOG4763	Ubiquinol-cytochrome c reductase hinge protein	C	Energy production and conversion	K00416|1|5e-45|144|pavi:110767101|ubiquinol-cytochrome c reductase subunit 6	GO:0006122//mitochondrial electron transport, ubiquinol to cytochrome c	GO:0008121//ubiquinol-cytochrome-c reductase activity	GO:0005743//mitochondrial inner membrane;GO:0070469//respiratory chain	MVSSECSQYWILPLIVGTGSSVSCSSDITIMYSPTPVCKTYDIVDVGLFVFCMADEEPVDQKKYLEESCKPKCVKPLLEYQACVKRIQGDESGHKHCTGQYFDYWSCVDKCVAPKLFPKLK
Prupe.1G562600.1.p	1.26613	0.233001	0.00556506	0.240663	Up	XP_007222866.1	transmembrane protein 87B isoform X1 [Prunus persica]	-	-	-	-	At2g01070	645	0	KOG2568	Predicted membrane protein	S	Function unknown	-			GO:0016021//integral component of membrane	MDFTIQMRATRTRRRNNGIFLTLSLLLLLSLFANPTNASIHIYDNQTFREVGNAYLLSGGSEGIAASLSTGSYIRFEKITFWRSKDAADKHSDMEHSTGLIQVIIFEAADRNNIGGSAYGGQRAICCTPDLAKMEGCKQGEVIRRPSAIDINWPIVLNVQFRGNYLYANMDYKEVSIPKTGMYNLFFVACDPKLKGLVMSGKTLWKNPDGYLPGRMAPLMKFYVFMSLAYVVLGIIWFTQYVRFWKDVLQLQHCITLVIALGLFEMILWYVDYVNFNNTGMRPIVVTTLVVTVGAVRKTVSRLLILIVSMGYGVVRPTLGGLTSKVLLLGTTFFLATELLNITEYVGTINDVSGRARLFLVLPDAFLDAFLILWIFTSLSRTLEQLQAKRSSVKLDMYR…
Prupe.1G572400.1.p	10.3555	7.17479	0.0118556	0.0253211	Up	XP_007224450.1	nucleolar GTP-binding protein 1 [Prunus persica]	74.64	0	sp|Q9C6I8|NOG1_ARATH	Nucleolar GTP-binding protein 1 OS=Arabidopsis thaliana GN=At1g50920 PE=2 SV=1	At1g50920	1008	0	KOG1490	GTP-binding protein CRFG/NOG1 (ODN superfamily)	R	General function prediction only	K06943|1|0.0|1392|pper:18788580|nucleolar GTP-binding protein	GO:0042254//ribosome biogenesis	GO:0005525//GTP binding	GO:0005730//nucleolus	MVQYNFKKMPVVPNRKDFIDIILSRTQRQTPTVVHKGSAISSLRKFYMRKVKCTEQNFHEKLSTIIDGFPRLDDVHPFYGDLLHVLYNKDHYKLALGQVNTARNLIGKISNDYMKLLKYGDSLYRCKCLKVAALGRMCTVVKRIGPSLAYLEQIRQHISRLPSIDPNIHTILICGYPNVGKSSFINKITRADVDVQPYAFTTKSLFVGQTDYKFLRYQVIDTPGILDRPFEDRNIIEMCSITALAHLRAAAVLFFLDISGSCGYSIAQQAALFHSIKSLFMNKPLIIVCNKTDLQPLEGISEEDMKLVMEMKSEAMKTVIGLGGEATSDEGVLLTMSTLTEDGVISVKNTACERLLNQRVDLKMKSQKINDFVNRFHVAMPQPRDQKERPPCIPQSVPE…
Prupe.1G586200.1.p	-10.3402	7.1191	0.0318195	0.0582516	Down	XP_007223469.1	16.9 kDa class I heat shock protein 1 [Prunus persica]	51.41	3e-54	sp|Q38806|HSP22_ARATH	22.0 kDa heat shock protein OS=Arabidopsis thaliana GN=HSP22.0 PE=2 SV=1	At4g10250	171	5e-54	KOG0710	Molecular chaperone (small heat-shock protein Hsp26/Hsp42)	O	Posttranslational modification, protein turnover, chaperones	K13993|1|6e-147|410|pper:18791118|HSP20 family protein	-	-	-	MPRRIVTKMVAFLGLLLLMLMAATTKTHALIPYPTRPSSLSLWGMTDDPFRILEQTPFTIPRDVSAAALQDTLALARADWKETATAHVITLDIPGMKKEDVKIEVEENRVLRISGERKTEEQVEGDKWHRAERTNGKFWRQFRLPGNADVDQIKAHLEDGVLRITVPKFAAEKKRQPKLIDIAHHTTSSDDADIKAASAKVA
Prupe.2G044100.1.p	10.4661	7.74491	2.24914e-05	0.000118828	Up	XP_020413069.1	DNA-directed RNA polymerase III subunit 2 isoform X1 [Prunus persica]	76.44	0	sp|F4KD38|NRPC2_ARATH	DNA-directed RNA polymerase III subunit 2 OS=Arabidopsis thaliana GN=NRPC2 PE=2 SV=1	At5g45140	1820	0	KOG0215	RNA polymerase III, second largest subunit	K	Transcription	K03021|1|0.0|2410|pper:18787298|DNA-directed RNA polymerase III subunit RPC2 [EC:2.7.7.6]	-	-	-	MGVAQDSSADPPKKNKQNRSNDGKQILHSAIDKEFLAAPIKSATDKFALLPEFLKVRGLVKQHLDSFNYFVNTGIKKIVRANDRIVSGVDPSIYLRFKDISIGEPSLTMDGVTEKIAPHTCRLSDMTYSAPIKVDVEYIQGSHDQKTRVEKKGVVIGRMPIMLRSCSCTLYGKTESELAKLGECPLDPGGYFIIKGNEKVLLMQEQLSKNRIIIDMDKKGNLNASVTSSSERIKSKTIIQMENQKIYLMLNQFVKKIPIMVVMKAMGMESDQEVVQMVGRDPRYAALLMPSIEDCAKEGIHKQEQALAYLETKVKRFSFAGASSENDGRVMTVLQDVFLANVEVCQDNFRPKCIYVAVMLRRIMDAILNKDAMDDKDYVGNKRIELSGQLISLLFEDLF…
Prupe.2G059400.1.p	10.3808	7.3	0.000980329	0.00285037	Up	XP_020412036.1	TMV resistance protein N [Prunus persica]	44.31	1e-95	sp|Q40392|TMVRN_NICGU	TMV resistance protein N OS=Nicotiana glutinosa GN=N PE=1 SV=1	At5g48620	82	4e-16	KOG4658	Apoptotic ATPase	T	Signal transduction mechanisms	K22038|1|3e-101|328|aip:107645897|volume-regulated anion channel!K08852|4|4e-88|290|mdm:103426788|serine/threonine-protein kinase/endoribonuclease IRE1 [EC:2.7.11.1 3.1.26.-]	-	-	-	MTTESSSNLLSSSSSTSGWKYDVFLSCRRNGSCRKFKDHLYAALNKRGIFTIGDDDEWERGREEAILKAVEESRYVILVLSQNYASSTWCLDALAKAVECTKSMGQTILPIFYDVEPYEVLRQKGSFAEAFSKHEQVFKDNMGKVYRWRAALDTVGNLNGWNLQDGYESKAIQTIVEWIFNELNEAISSVSKDLVGIDSRVKEVLSYLESETWPDDARIIGISGMKGIGKTTIARVVFDSIRARFEACSFLADIREVTDKQGPTHLQKQLLSDLLKRSVNIWNVEMGINVLRERLQNKKVLIVLDDVDQLEQLAALCDRSCFGLGSRIIITSRDERLLSTFGVDKVYKVEPLTDEEAFKLFSSKAFKKDVVGEEFLELSKNVVEFANGLPLALKGLGSF…
Prupe.2G084400.1.p	9.95202	5.42154	3.21309e-05	0.000132349	Up	XP_020412548.1	uncharacterized protein LOC18787927 [Prunus persica]	24.49	3e-08	sp|Q9LDX1|SGS3_ARATH	Protein SUPPRESSOR OF GENE SILENCING 3 OS=Arabidopsis thaliana GN=SGS3 PE=1 SV=1	-	-	-	-	-	-	-	K22909|1|8e-141|449|egr:104421727|zinc finger CCCH domain-containing protein 13	-	-	-	MQSGKHENFNKQSPASRLRAHNRLESGPEPYSGSRRGNIRREAADHSIRGTLSPHELQQDVGVSQRTDYIDRRDYGWHLGGGRTDRVRQRSRSASPVQPFGNMRKRPHFDEGVGVLRRNYSPPPQVPVRLELPRRQELAEPGTYNATDDLNSRRVYGSDHNDSRISKEELNEIGLSAGDKHGTLSQKSVHMEDGTVRGSKSVLTEDNTVLGTYWPPPDPYPVITPGESGAHLPSSSRSMNIRHFEQERLHYLDPVALDRLPVTKSYKGENPIFPSRDGVHPMMSGAHSEDFLASSSTGIRNEFQESYRGGMHLPSLDEFSSSSRKLTDSLSINAFKQRPLANSSRDPDSGKRNLSFYQRCSPTRGEHDDYFRTKSRGMAVDDRGYPSDDLHKMMHPRAP…
Prupe.2G092300.1.p	-1.03835	0.0387915	0.0237724	0.318793	Down	XP_020412139.1	uncharacterized protein LOC18786784 isoform X1 [Prunus persica]	28.31	2e-34	sp|Q94KD8|BXL2_ARATH	Probable beta-D-xylosidase 2 OS=Arabidopsis thaliana GN=BXL2 PE=2 SV=1	-	-	-	-	-	-	-	K05349|1|0.0|1233|pper:18786784|beta-glucosidase [EC:3.2.1.21]	GO:0005975//carbohydrate metabolic process	GO:0004553//hydrolase activity, hydrolyzing O-glycosyl compounds	-	MAKVEDEVIEAHVKQLLSRMTLKEKVGQMTQIERQVATSAAIKDLSIGSIFSAPGSLPVEKASPSDWADMVDGFQRSALESRLGIPLIYGTDAVHGNGNVFGATIFPHNVGLGATRDADLARRIGVATALEARACGIHYTFAPCVAVCKDPRWGRCYESYSEDTEIVGKMTSIVSGLQGQPPQGYPKGYPFVAGRNNIIASAKHFVGEGGTEKGVNEGNNISSYDDLERIHMRPYLDCISQGVSTIMVSYNSWNGQRLHGHNFLLTEILKDKLGFRMQGFVISDWDGIDQLCEPEGSNYRLCISLAINAGIDMVMVPFRYEQFIEELIYLVESGEIPMSRIDDAVERILRVKFVAGLFEHPFTDTSLQDIVGCKMHRDLAREAVRRSLVLLKNGKDPME…
Prupe.2G115500.1.p	1.11301	0.425685	0.0309076	0.340363	Up	XP_007218603.1	acyl carrier protein 1, mitochondrial [Prunus persica]	69.05	3e-57	sp|P53665|ACPM1_ARATH	Acyl carrier protein 1, mitochondrial OS=Arabidopsis thaliana GN=MTACP1 PE=1 SV=1	At2g44620	173	5e-57	KOG1748	Acyl carrier protein/NADH-ubiquinone oxidoreductase, NDUFAB1/SDAP subunit	CIQ	Energy production and conversion;Lipid transport and metabolism;Secondary metabolites biosynthesis, transport and catabolism	K03955|1|9e-89|256|pper:18787332|NADH dehydrogenase (ubiquinone) 1 alpha/beta subcomplex 1	GO:0006633//fatty acid biosynthetic process		GO:0005759//mitochondrial matrix	MALRAALLRHVRIPAQTLNPALTLTGGKWGPPSLRWMSSHDDHLTKSEVTERVLSVVKSFPKVDPSTVTSDVHFQKDLGLDSLDNVEIVMALEEEFKLEIPDKEADKIDSTNLAIEYIYNHPMAG
Prupe.2G149700.1.p	10.2814	6.81364	2.55657e-05	0.000118828	Up	XP_007219534.1	probable carboxylesterase 9 [Prunus persica]	53.8	2e-119	sp|O64641|CXE9_ARATH	Probable carboxylesterase 9 OS=Arabidopsis thaliana GN=CXE9 PE=2 SV=1	At2g45610	346	4e-119	KOG1515	Arylacetamide deacetylase	V	Defense mechanisms	K14493|1|4e-46|164|smo:SELMODRAFT_450797|gibberellin receptor GID1 [EC:3.-.-.-]!K07874|5|2e-35|139|cpap:110808914|Ras-related protein Rab-1A	GO:0008152//metabolic process	GO:0016787//hydrolase activity	-	MSKFDPYAHLNISHDPATDTLTRPATTPTTPTNTDPTPGDPVVFKDVTLNPETRTWARIFRPTKLPSNDNTVARLPIIIYFHHGGWILLSAADAAAHTNCSQITSEVPVIIVSVNYRLAPESRLPAQHHDALDAIHWVRAQAQDPKGENWIRDYADVSRCYLYGCGCGGNIVFFSGLKAYQLQLEPLKISGIIMNQPMFGGLQRTNSELRFATDQLLPLPVLDLMWDMALPKSTDRNHPYCNPMADEVHRDLIKRLGRCLVIGFGGDPMIDRQQEFVTMLVACGVRVDARFDDLGFHNVDFVDSRRAAAVLNIVKEFII
Prupe.2G161000.1.p	4.02175	0.861217	0.00951941	0.265737	Up	XP_007219267.1	(+)-neomenthol dehydrogenase [Prunus persica]	62.46	1e-136	sp|Q9M2E2|SDR1_ARATH	(+)-neomenthol dehydrogenase OS=Arabidopsis thaliana GN=SDR1 PE=1 SV=1	At3g61220	388	2e-136	KOG1208	Dehydrogenases with different specificities (related to short-chain alcohol dehydrogenases)	Q	Secondary metabolites biosynthesis, transport and catabolism	K15095|1|0.0|605|pper:18787069|(+)-neomenthol dehydrogenase [EC:1.1.1.208]	-	-	-	MAEATKRYAVVTGANKGIGLETVRQLASNGFTVVLTARDEKRGLEAVEKLKESGLSGQVVFHQLDVVDPATVASLADFIKTQFGKLDILVNNAGVIGSIVDGDAFKASVASGATERGGVDFSKLVTETYELTEECLQINYYGAKRTAEALIPLLLLSDSPRIVNVSSVMGMLNNIPSDWARGVFTDAENLTEERVDEVLTELLKDFKEGSLESKGWPSSMPAYIVSKAALNAYTRILGKKYPTFRINSVCPGFVKTDINFNAGVLPVEEGGARIVKLALLPNDGPTGSFFVHNEVSDF
Prupe.2G174300.1.p	1.20529	0.399959	0.019564	0.29494	Up	ONI23195.1	hypothetical protein PRUPE_2G174300 [Prunus persica]	55	0	sp|P92949|FRO2_ARATH	Ferric reduction oxidase 2 OS=Arabidopsis thaliana GN=FRO2 PE=1 SV=2	At1g01580	810	0	KOG0039	Ferric reductase, NADH/NADPH oxidase and related proteins	PQ	Inorganic ion transport and metabolism;Secondary metabolites biosynthesis, transport and catabolism	K00521|1|0.0|1452|pper:18786837|ferric-chelate reductase [EC:1.16.1.7]	-	-	-	MDAQVVKSSSPPSHVGIHVMRAAIRLLAVFVVFLGSLFVWFMMPTNTYSQIWRLQIRQKTNSSSNIVMFTFPILFLALLGCVFLHLGKKLNDYKVESSSNGTKNRFAVWKKPMLVKGPLGIVSGIELAFFIMFIALLIWSFSTYLHNSFANITPKSAAKNHEKIWESKLDSAALRLGLVGNICLAFLFFPVARGSSILALFGLTSEGSIKYHIWLGHLVMLLFTAHGLCYVIYWAATGQISEMVQWDKTGISNIAGELSLLFGLIMWVTAIPRIRRKIFELFFYTHYLYILFMIFFILHVGMSYSCIMLPGFYLFLVDRFLRFLQSGTRARLICSRVLPCETLELNFAKSPGLKYNPTSVMFINVPSISKMQWHPFTVTSNSSLEPEKISVVIKAEGSW…
Prupe.2G190100.1.p	10.2901	6.85502	0.00474225	0.0118045	Up	XP_007220204.2	transcription factor bHLH13 [Prunus persica]	54.95	0	sp|Q9LNJ5|BH013_ARATH	Transcription factor bHLH13 OS=Arabidopsis thaliana GN=BHLH13 PE=1 SV=1	-	-	-	-	-	-	-	K22484|1|6e-78|253|aof:109840049|transcriptional regulator CBF1!K13422|2|3e-76|259|crb:17879015|transcription factor MYC2	-	-	-	MVPVPKKDSSCFAALSNQFLMIPFCMPKLMKIEMGLGGGVWNDGDKAMVAAVLGTRAFDYLISSSVSSNENSCMGIGTDENLHNKLSDLVEPPNASNFSWNYAIFWQISRSKSGDWALCWGDGSCREPKEGEESEATRNLNLRLEDETQQTMRKIVLQKLHTLFGSSDEYNGALGLDRVTDTEMFLLASMYFSFPRGEGGPGKCFASGKHVWLSDLLKSGSDYCVRSFLAKSAGVQTIVLVPTDVGVVELGSVRCVGESLELLQSIRSLFSTQSSLTRSKPLTGFPVMGKRRDENAQLTNLSPVERGEGVPKIFGQDLNSGNSGRPRYREKLAVRKVEERPWDVYSNGNRIAFSSPRNGIQVSSWPHIHDAKQGSPTEMYASQSPVNNIQELVNGVRDD…
Prupe.2G193300.1.p	10.4283	7.54432	2.30894e-05	0.000118828	Up	XP_007220597.1	calcium-transporting ATPase, endoplasmic reticulum-type [Prunus persica]	82.15	0	sp|Q42883|ECAP_SOLLC	Calcium-transporting ATPase, endoplasmic reticulum-type OS=Solanum lycopersicum GN=LCA1 PE=2 SV=1	At4g00900	1705	0	KOG0202	Ca2+ transporting ATPase	P	Inorganic ion transport and metabolism	K01537|1|0.0|2155|pper:18784859|Ca2+-transporting ATPase [EC:3.6.3.8]		GO:0016787//hydrolase activity;GO:0005524//ATP binding	GO:0016021//integral component of membrane	MEEKPVPAWSWPVEQCLKEYHVKLDKGLSTYEAEKRRERYGWNELSKEKGKPLWRLVLEQFDDTLVKILLVAAFISFVLAFLGGGESGESGFEAYVEPFVIVLILILNAIVGVWQESNAEKALEALKQMQSESGKVLRDGYLVPDLPARELVPGDIVELRVGDKVPADMRVAVLKTSTLRVEQSSLTGEAMPVLKSTGPIFMDDCDLQAKENMVFSGTTVVNGSCLCVVVSTGMNTEIGKIQKQIHEASLEEDDTPLKKKLDEFGSRFTTAIGFVCLIVWVMNYKNFLSWDLVDGWPTNVRFSFERCTYYFKIAVALAVAAIPEGLPAVITTCLALGTRKMAQKNAIVRKLPSVETLGCTTVICSDKTGTLTTNQMSVTEFFTLGGKTTASRTIRVEGT…
Prupe.2G198300.1.p	10.2965	6.88787	0.0140765	0.0284822	Up	XP_007219276.2	beta-glucosidase 12 isoform X1 [Prunus persica]	66.04	0	sp|Q7XKV4|BGL12_ORYSJ	Beta-glucosidase 12 OS=Oryza sativa subsp. japonica GN=BGLU12 PE=1 SV=2	At5g42260	577	0	KOG0626	Beta-glucosidase, lactase phlorizinhydrolase, and related proteins	G	Carbohydrate transport and metabolism	K01188|1|0.0|1071|pper:18786590|beta-glucosidase [EC:3.2.1.21]	GO:0005975//carbohydrate metabolic process	GO:0004553//hydrolase activity, hydrolyzing O-glycosyl compounds	-	MAMQLRSFLLGILLLIGLAFTNSEADIRAPPTHFDTASLNRSSFPEGFVFGVGSGSYQYEGAAKEGGRGPSIWDTFTHKYPEKINDSSNGDITVDQYHRYKEDVGIMKNMGWDAYRFSISWSRLLPNGKLSGGVNKEGIKYYNNLINELLRNGLTPFVTLFHWDLPQTLEDEYGGFLSPHIVNHFQDYAELCYKEFGDRVKHWMTLNEPYTFSNYGYATGSQAPGRCSTWQQLNCTGGDSSTEPYLVTHHQLLAHAAAVKLYKNRYQASQNGVIGITLVSDWFEPLSEEKENKNAALRALDFMFGWFAEPLTSGDYPQSMRSLVGSRLPKFTKEQSKLLIGSFDFLGLNYYTGYYASDAPRNNSVYASYTTDAGVNLSSERNGVLIGPKGASEWLNVYP…
Prupe.2G206200.1.p	9.58682	4.20785	4.13995e-05	0.000160946	Up	ONI23755.1	hypothetical protein PRUPE_2G206200 [Prunus persica]	65.36	0	sp|O04375|2A5A_ARATH	Serine/threonine protein phosphatase 2A 57 kDa regulatory subunit B' alpha isoform OS=Arabidopsis thaliana GN=B'ALPHA PE=1 SV=1	At5g03470	629	0	KOG2085	Serine/threonine protein phosphatase 2A, regulatory subunit	T	Signal transduction mechanisms	K11584|1|0.0|928|pper:18787658|serine/threonine-protein phosphatase 2A regulatory subunit B'	GO:0007165//signal transduction	GO:0019888//protein phosphatase regulator activity	GO:0000159//protein phosphatase type 2A complex	MLKIIKRGHRKSPKPEPTDLEFEPESQPITLSLSMEPLPLLRDVAVLDRPALFLKKLQLCSFYCDFSNSLKWVLEKELKRQTLMELVDFIDSGSCKLTGPMQEELIRMVSLNIFRCLPPASDLLEPDEDEPYQEPSWPHLQIVYELLLRYIASPETDAKVAKRYIDHIFVLRLMELFDSEDPREREYLKTLLHRIYGKFMVHRPFIRKAMNNVFYRFIFETQRHCGIGELLEILGSIINGFALPMKEEHKLFLVRALIPLHKPKSISAYHHQLAYCIIQFVDKDYKLAELVVKGLLKYWPVTNCQKEVLFLAELEEVLEATQAAEFHRCMLPLFRQIGRCLNSPHFQVAERALYLWNSEHIVSLIAQNRNMILPLIFEALEKNTQGHWNQAIHGLTANV…
Prupe.2G211800.1.p	1.00789	0.267801	0.00551602	0.240663	Up	XP_007220630.2	phenylalanine ammonia-lyase 1 [Prunus persica]	86.26	0	sp|Q9M568|PAL1_RUBID	Phenylalanine ammonia-lyase 1 OS=Rubus idaeus GN=PAL1 PE=2 SV=1	At2g37040	1234	0	KOG0222	Phenylalanine and histidine ammonia-lyase	Q	Secondary metabolites biosynthesis, transport and catabolism	K10775|1|0.0|1492|pper:18784865|phenylalanine ammonia-lyase [EC:4.3.1.24]	GO:0009800//cinnamic acid biosynthetic process;GO:0006559//L-phenylalanine catabolic process	GO:0045548//phenylalanine ammonia-lyase activity	GO:0005737//cytoplasm	MEIGNKDQNGNGMESFCVGHDQLHGTQDPLNWGMAAESLKGSHLDEVKRMVNEYRKPVVRLGGETLTIAQVAAIANHDSGVHVELSEDARAGVKASSDWVMDSMSKGTDSYGVTTGFGATSHRRTKQGGALQRELIRFLNAGIFGSSTESTHTLPHTATRAAMLVRINTLLQGYSGIRFEILEAITKFLNNNITPCLPLRGTITASGDLVPLSYIAGLLIGRPNSKSTGPNGETLTAADAFKLAGVNGGFFELQPKEGLALVNGTAVGSGLASMVLFEANTQAVLAEVMSAIFAEVMQGKPEFTDHLTHKLKHHPGQIEAAAIMEHILAGSDYVKAAEKVHDLDPLQKPKQDRYALRTSPQWLGPQIEVIRAATKMIEREINSVNDNPLIDVSRNKALH…
Prupe.2G242000.1.p	-10.4564	7.70062	2.26207e-05	0.000118828	Down	XP_007220224.2	cucumisin [Prunus persica]	54.8	0	sp|Q39547|CUCM1_CUCME	Cucumisin OS=Cucumis melo PE=1 SV=1	-	-	-	-	-	-	-	K15333|1|2e-78|280|nsy:104224633|tRNA guanosine-2'-O-methyltransferase [EC:2.1.1.34]!K12619|2|1e-55|210|ghi:107940264|5'-3' exoribonuclease 2 [EC:3.1.13.-]!K14568|3|5e-21|103|dct:110101229|rRNA small subunit pseudouridine methyltransferase Nep1 [EC:2.1.1.260]!K13199|5|4e-16|87.0|mtr:MTR_7g081660|plasminogen activator inhibitor 1 RNA-binding protein	-	-	-	MDLVPWSRKEFFLVVWFLLLSFTCTLLVDVTHSAAHPDTRKVYIVYMGDKPKIDIPTTTTLPLHLNMLQNVVGSSNIEQEPLLLHSYKRSFNGFAAKLTEEEAQKMAGMAGVVSVFPSRKQKLHTTRSWNFIGFHENVKRSTVESDIIVGMIDSGVWPESASFSDAGFGPPPKKWKGTCQGLSNFTCNNKIIGARYYHNGRPFIKGDIKSPRDSDGHGTHTASTAAGNLVSKASLFVLGSGTARGGVPSARIAVYKVGWSDGISDDDILAAFDDAIADGVDILSLSLGKAEDDYFRDSISIGAFHALRKGILTSTAAGNDGPGPKTIANFAPWFLSVAATTIDREFVTKVQLGNQKIYEGIVTNTFDLKGKFYPLIHAGDAPNRKAGYDGSTSMKCKPG…
Prupe.2G242500.1.p	-1.56812	0.368228	0.00802586	0.264878	Down	XP_020414111.1	uncharacterized protein LOC18787223 [Prunus persica]	-	-	-	-	-	-	-	-	-	-	-	-	-	-	-	MENKNQVGGGGSSHASSSSSRTLDHLFGPKDSSSSSSSSLFGSIFPPPPSAGLGSSGKYGNPSALDNKSQGFYTSKGESTKGASKDSMIYQNEAVEPCNFSSSIYYGGQENYSPRTGTTTESHQHHLSKKDGGDDDANGNNSNGASRGNWWKGSLYY
Prupe.2G251200.1.p	-10.0047	5.62896	3.09468e-05	0.00013058	Down	ONI24632.1	hypothetical protein PRUPE_2G251200 [Prunus persica]	78.37	0	sp|P48619|FAD3C_RICCO	Omega-3 fatty acid desaturase, chloroplastic OS=Ricinus communis GN=FAD7A-1 PE=2 SV=1	-	-	-	-	-	-	-	K10257|1|0.0|926|pper:18785351|acyl-lipid omega-3 desaturase [EC:1.14.19.25 1.14.19.35 1.14.19.36]	GO:0006629//lipid metabolic process	GO:0016717//oxidoreductase activity, acting on paired donors, with oxidation of a pair of donors resulting in the reduction of molecular oxygen to two molecules of water	GO:0016021//integral component of membrane	MVQYKRNNDFDRDQKKNTKFDHVRTRLILHLVGPANHSYMRREERLQNTIERGQTTRSPSCWTWRREALVLSPHSLFSFYGRLVHSFIISQACLRHPKLKSFLYLLHLGLMASWVLSECGLKPLPRVYPQARNGLTSKTAIFANARPLPVCKSNIFGSSLRASNGIRGTNWALNVSAPLRVPSVDGGDNGRVSVNGVEDGSDFDPGAPPPFNLADIRAAIPKHLWVKDPWRSMSYVVRDVAVVLGLAAVAAYFNNWVVWPLYWFAQGTMFWALFVLGHDCGHGSFSNNPKLNSVVGHLLHSSILVPYHGWRISHRTHHQNHGHVENDESWHPLSEKVYKTLDKATQMLRFTLPFPMLAYPFYLWGRSPGKSGSHFDPNSDLFVPNERKDIITSTACWTA…
Prupe.2G282000.1.p	10.5454	8.18811	0.00033723	0.00107047	Up	XP_007218756.1	probable rRNA-processing protein EBP2 homolog [Prunus persica]	64.31	1e-119	sp|Q9LUJ5|EBP2_ARATH	Probable rRNA-processing protein EBP2 homolog OS=Arabidopsis thaliana GN=EBP2 PE=1 SV=1	At3g22660	345	2e-119	KOG3080	Nucleolar protein-like/EBNA1-binding protein	A	RNA processing and modification	K14823|1|0.0|587|pper:18784629|rRNA-processing protein EBP2	-	-	-	MGVSNKESRQFNEDSMEEDDLEDVSEPESEPESEDEEDVKLTEPSKKAIFNRDGLLDKLGDISWPENAGWVHKLSVDIDQEQQVDVNDDLTRELAFYTQAVEGTRKAFEKLQSMGLPFLRPEDYYAEMVKTDSHMERVKSRLLVEKKKIEEADERRKARDAKKLSKEIQAQKLKERAKQKKEDIESVKKWRKQRQQSGFAGGDKGSELDLAFEDGKPFEKSSNKRPGVAPGDRSGGKARQGVKVGKKPKKRDIKDSKFGYGGRKGSKKQNMAETTNDLRGFNKDSLSGNKKRKR
Prupe.2G284200.1.p	10.4737	7.78655	3.87993e-05	0.000152552	Up	ONI25147.1	hypothetical protein PRUPE_2G284200 [Prunus persica]	72.29	0	sp|Q41382|RH7_SPIOL	DEAD-box ATP-dependent RNA helicase 7 OS=Spinacia oleracea GN=RH7 PE=2 SV=1	At5g62190	812	0	KOG0331	ATP-dependent RNA helicase	A	RNA processing and modification	K16911|1|0.0|1331|pper:18784897|ATP-dependent RNA helicase DDX21 [EC:3.6.4.13]		GO:0003723//RNA binding;GO:0005524//ATP binding;GO:0004386//helicase activity	GO:0005634//nucleus	MPSLDISDYLLAETTPKEKKEKKMKKSKSETLEADFPSTEKKAKKDSKLKKRKALDVEADEDRSDTSSELGEAVNAKSKSEEKTKKKSKKAKVEQEEEPKIEEKKAEEDPNAVSRFRISEPLKAKLKEKGIESLFSIQAMTFDTILDGSDLVGRARTGQGKTLAFVLPILESLINGPAKAFRKTGYGRAPTVIVLLPTRELAKQVFADFEFYGGAMGLAACCVYGGSPYQPQEYKLKRGVDIVIGTPGRIKDHIEKGNIDLSTLKFRVLDEADEMLRMGFVDDVELILGKVGDVSKVQTLLFSATLPDWVKGISSRFLKPNKKTADLVGNEKMKASHNVRHIVLPCSSSARSQLIPDIIRCYSSGGRTIIFTETKEAASELAGLLPGARALHGDIQQGQ…
Prupe.2G315300.1.p	2.03747	0.840867	0.0458861	0.382717	Up	ONI25700.1	hypothetical protein PRUPE_2G315300 [Prunus persica]	53.68	0	sp|Q9FIN7|MIP2_ARATH	MAG2-interacting protein 2 OS=Arabidopsis thaliana GN=MIP2 PE=1 SV=1	At5g24350	2566	0	KOG1797	Uncharacterized conserved protein (Neuroblastoma-amplified protein)	S	Function unknown	K20473|1|0.0|4954|pper:18785852|neuroblastoma-amplified sequence	-	-	-	MDEPTPTVFYETRRHITRPYTPSYPPQQVLNYVVFLNFNIIKFIFHNRSINQFPDCFLFRLIYGVQANDGSKGSFLSLLSLQGVNQLKEKWNEYKQPRKLRKLASLFISPRGERVAVASGNQITILQKEDDYSKPCGTFTSGSLASFTTGTWSESHDVLGVADDTDTLYFIKANGDEITRIARRHLKVSLPVISLIVQDDSDAQKSCLCSFIVVTSDGSLQHVEICQDPSSSIYSARTSNNGLTAKGQFPDNVLCVDYQPGLSLLAVVTLTSGSCYLSLWGRSRIIDLEQLVTIQFEGFYSKPKGQKSKLAHPKVLISPQAKFVATLDVTGCLHIFKLDKDCFSLSNFTCRERCESELTNNLSSGEGEHLSDIVDFTWWSDHILAFARRSGIVTMLDIL…
Prupe.2G317700.1.p	-10.7229	9.26385	1.88033e-05	0.000118828	Down	XP_007218357.1	small heat shock protein, chloroplastic [Prunus persica]	63.25	2e-102	sp|P09886|HS21C_PEA	Small heat shock protein, chloroplastic OS=Pisum sativum GN=HSP21 PE=2 SV=1	At4g27670	267	6e-91	KOG0710	Molecular chaperone (small heat-shock protein Hsp26/Hsp42)	O	Posttranslational modification, protein turnover, chaperones	K13993|1|8e-164|454|pper:18787699|HSP20 family protein	GO:0042542//response to hydrogen peroxide;GO:0009658//chloroplast organization;GO:0006355//regulation of transcription, DNA-templated;GO:0009408//response to heat;GO:0009644//response to high light intensity	GO:0043621//protein self-association	GO:0000427//plastid-encoded plastid RNA polymerase complex;GO:0101031//chaperone complex;GO:0042644//chloroplast nucleoid	MSSTLALSSSSPLLSTKARSSIKTYVTAPCSATFPSRLHRLPVVRAQAGGDGKLDVQVNQGNQGTEVERRPRRLAVDISPFGLLDPISPVRTMRQMLDTVDRLLEDTVTLPGRNRASGEVRAPWDIKDDEHEIKMRFDMPGLSKEDVKVAVEDDVLVIKGEHKKEESGDDSWSSRSFSSYNTRLQLPDNCEKDNIKAELKNGVLYISIPKTKVERKVIDVAIQ
Prupe.2G319900.1.p	1.00156	0.309531	0.0119539	0.271426	Up	XP_007218364.1	nascent polypeptide-associated complex subunit alpha-like protein 2 [Prunus persica]	69.74	1e-87	sp|Q94JX9|NACA2_ARATH	Nascent polypeptide-associated complex subunit alpha-like protein 2 OS=Arabidopsis thaliana GN=At3g49470 PE=2 SV=2	At3g49470	258	2e-87	KOG2239	Transcription factor containing NAC and TS-N domains	K	Transcription	K03626|1|1e-159|444|pper:18786272|nascent polypeptide-associated complex subunit alpha			GO:0005854//nascent polypeptide-associated complex	MSPAPLVHTEAADEVLSTDQSLKNSHQNKGEDEVVVEDVKDDNDRDEDDEDDDDDDDDDDKEDGAQGGNESSKQSRSEKKSRKAMLKLGMKPVTGVSRVTIKRTKNILFFISKPDIFKSPNSETYVIFGEAKIEDLSSQLQTQAAQQFRMPDMSSVMTKSEISAAAAGAQADEEEEEVDEAGVEPRDIDLVMTQAGVSRSKAVKALKTHSGDIVSAIMELTT
Prupe.2G322900.1.p	10.3727	7.25969	0.00700551	0.0157397	Up	XP_007221007.1	uncharacterized protein LOC18787219 [Prunus persica]	-	-	-	-	-	-	-	-	-	-	-	-			GO:0016021//integral component of membrane	MATTLRCPQAVAPLPWRARRPNNSRGTIPMGPRQVSNIRAFGRSDIGSFARDAWRSANDGFERFLFEAKKTAERLDRRYALSHRFDTIAQSAAARAREIDRDLEIGTRWRAFSMDFSRNLPRYRKQLNDFLETPLGRSFATIFFLWFALSGWLFRLLIFATWVLPFAAPLVIGAVANNLVIKGACPACKRQFVGYKNQVIRCASCGNTVWQPKGDFFSRDGRGPSSSKSEPEIIDVEFEEK
Prupe.2G325200.1.p	-2.02868	0.673725	0.0167842	0.287297	Down	XP_007220649.1	laccase-15 [Prunus persica]	54.24	0	sp|Q9FY79|LAC14_ARATH	Laccase-14 OS=Arabidopsis thaliana GN=LAC14 PE=2 SV=1	At5g09360	653	0	KOG1263	Multicopper oxidases	Q	Secondary metabolites biosynthesis, transport and catabolism	K05909|1|0.0|1171|pper:18784745|laccase [EC:1.10.3.2]	GO:0046274//lignin catabolic process	GO:0052716//hydroquinone:oxygen oxidoreductase activity;GO:0005507//copper ion binding	GO:0048046//apoplast	MLAMRILISLQLLGLTLLCVGIFHCQASPRYTFVVEETPYRRLCSTKNILTVNGQFPGPTLYVRSGDIIIVDVYNKGNRNITIHWHGVRQLRNPWSDGPDYITQCPIQPGGSFTQTIMFSSEEGTLWWHAHSEWDRATVHGAIVIYPNKGATYPFPKPHAEFPIILGEWWKEDIGQLYKKAIQSGGEPNISSAFLINGQPGDLYPCSKPDTFKLMVDYGKTYLLRLINSAVQDILFFSIANHKVTVVGSDASYTKPFSSDYVTISPGQTIDLLFTADQSPNHYYIAAKAYVGGAGIVYDNTTTTAILQYNGNYTSTSIPSLPNLPSHNDTKASVHFTGSLRSLADQNHPVDVPRKITTPLFYTLSVNTLPCLNNSCAGPNGTRLSASVNNISFVDPSID…
Prupe.2G326300.1.p	10.4457	7.6792	0.00281285	0.00742937	Up	ONI25911.1	hypothetical protein PRUPE_2G326300, partial [Prunus persica]	80.58	0	sp|P31687|4CL2_SOYBN	4-coumarate--CoA ligase 2 OS=Glycine max PE=2 SV=2	At1g65060	504	3e-177	KOG1176	Acyl-CoA synthetase	I	Lipid transport and metabolism	K01904|1|0.0|706|pper:18786755|4-coumarate--CoA ligase [EC:6.2.1.12]	-	-	-	IFKQFKASNAKLIITHSQFVDKLREAPADGAAPDQNNYPKLGEHFKVVTVDDPPENCLHFSVISEANETELPEVVIDPEDPVALPFSSGTTGLPKGVILTHKSLITSVAQQVDGENPNLYLKEDDVVLCVLPLFHIYSLNSVMLCSLRAGAAVLVMHKFEIGTLLELIQRYRVSVAAVVPPLVIALAKNPMVAQFDLSSIRVVLSGAAPLGKELEEALKSRVPRAVLGQGYGMTEAGPVLSMCLAFAKEPLPSKSGSCGTVVRNAELKVIDAETGCSLGYNQPGEICIRGSQIMKGYLNDAEATATTVDKEGWLHTGDVGFVDDDEEVFIVDRVKELIKFKGFQVCYI
Prupe.2G328300.1.p	-10.2133	6.50944	0.0174383	0.0342822	Down	XP_007221136.1	uncharacterized protein LOC18787181 [Prunus persica]	-	-	-	-	-	-	-	-	-	-	-	-	-	-	-	MEEDKGRLCRRCKQSYSPASNTPSSCRFHPSFFVCRRHDDQKRYYELGPKDPPYAAKFYDCCGAEDPEASGCTTSFHVSYDDD
Prupe.3G004000.1.p	1.01703	0.342219	0.01782	0.29077	Up	ONI14719.1	LOW QUALITY PROTEIN: hypothetical protein PRUPE_3G004000 [Prunus persica]	94.4	0	sp|Q9AT56|METK1_ELAUM	S-adenosylmethionine synthase 1 OS=Elaeagnus umbellata GN=SAMS1 PE=2 SV=1	At4g01850	735	0	KOG1506	S-adenosylmethionine synthetase	H	Coenzyme transport and metabolism	K00789|1|0.0|798|pper:18788092|S-adenosylmethionine synthetase [EC:2.5.1.6]	GO:0006556//S-adenosylmethionine biosynthetic process;GO:0006730//one-carbon metabolic process	GO:0046872//metal ion binding;GO:0004478//methionine adenosyltransferase activity;GO:0005524//ATP binding	-	METFLFTSESVNEGHPDKLCDQISDAVLDACLAQDADSKVACETCTKTNMVMVFGEITTKANVDYEKIVRETCRNIGFISDDVGLDADNCKVLVNIEQQSPDIAQGVHGHFTKRPEEIGAGDQGHMFGYATDETPELMPLSHVLATKLGARLTEVRKNGTCPWLRPDGKTQVTVEYYNENGAMVPVRVHTVLISTQHDETVTNDEIAADLKEHVIKPVVPENTLMRRQSFHLNPSGRFVIGGPHGDAGLTGRKIIIDTYGGWGAHGGGAFSGKDPTKVDRSGAYIVRQAAKSIVANGLARRALVQVSYAIGVPEPLSVFVDTYGTGKIPDKEILKIVKETFDFRPGMITINLDLKRGGGGRFLKTAAYGHFGRDDPDFTWEVVKPLKWEKPQS
Prupe.3G034800.1.p	-10.3952	7.38042	2.36022e-05	0.000118828	Down	XP_007215082.1	17.4 kDa class III heat shock protein [Prunus persica]	60.74	2e-55	sp|Q9SYG1|HS174_ARATH	17.4 kDa class III heat shock protein OS=Arabidopsis thaliana GN=HSP17.4B PE=2 SV=1	At1g54050	171	4e-55	KOG0710	Molecular chaperone (small heat-shock protein Hsp26/Hsp42)	O	Posttranslational modification, protein turnover, chaperones	K13993|1|6e-116|328|pper:18781646|HSP20 family protein	GO:0009408//response to heat	-	-	MSGVADSSAFNGDFATAVNHLLNFPETIDKFMFPSRAHETNNENKGAASIPVDILDSPKEYIFFLDLPGLSKSDIQVTVEDENTLVIRSNGKRKREDGEEEGCKYLRLERRGPQKLLRKFRLPQNANVGAISAKCENGVLSVVVEKLPPPPKPKTVEVSIS
Prupe.3G039300.1.p	1.18114	0.353694	0.0102397	0.26816	Up	XP_007215252.2	cytochrome P450 71A1 [Prunus persica]	43.28	1e-146	sp|Q9SD85|F3PH_ARATH	Flavonoid 3'-monooxygenase OS=Arabidopsis thaliana GN=CYP75B1 PE=1 SV=1	At5g07990	430	2e-146	KOG0156	Cytochrome P450 CYP2 subfamily	Q	Secondary metabolites biosynthesis, transport and catabolism	K20623|1|0.0|1049|pper:18783701|typhasterol/6-deoxotyphasterol 2alpha-hydroxylase	GO:0044550//secondary metabolite biosynthetic process	GO:0020037//heme binding;GO:0016709//oxidoreductase activity, acting on paired donors, with incorporation or reduction of molecular oxygen, NAD(P)H as one donor, and incorporation of one atom of oxygen;GO:0005506//iron ion binding	GO:0016021//integral component of membrane;GO:0016020//membrane	MMESISWVAYAAAWLGALVLILLSRRLRHRKLNLPPGPKPWPIIGNLNLISQLPHRSIHALAQKYGPIMQLKFGSHPVVVGSSVDMAKAFLKTHDVTFAGRPKFAAGKHTTYNYSDITWSPYGPYWRQARKMCVMELFSARRLESYEYIRKEEMNALLRGLFESSNTNILLKDHLSTVSLNVISRMVLGKKYTDESEDSIVSPDEFKKMLDELFLLSGVLNIGDSIPWLDFLDLQGYIKRMKTLSKKLDRFLEHVLDVHIAKRKAGGEDFVAKDMVDVLLQLADDPNLEVKLERHGVKAFTQDLIAGGTESSAVTVEWAISELLRKPEVFKKATEELDRVIGRERWVEENDIVNLPYVDAIAKETMRLHPVAPMLVPRLAREDCQVAGYDIPKGTRILV…
Prupe.3G039800.1.p	-1.02774	0.31426	0.0307791	0.340363	Down	XP_007215063.1	transcription initiation factor TFIID subunit 9 [Prunus persica]	77.6	7e-89	sp|Q9SYH2|TAF9_ARATH	Transcription initiation factor TFIID subunit 9 OS=Arabidopsis thaliana GN=TAF9 PE=1 SV=1	At1g54140	258	1e-88	KOG3334	Transcription initiation factor TFIID, subunit TAF9 (also component of histone acetyltransferase SAGA)	K	Transcription	K03133|1|3e-126|355|pavi:110768893|transcription initiation factor TFIID subunit 9B	GO:0051123//RNA polymerase II transcriptional preinitiation complex assembly;GO:0043966//histone H3 acetylation;GO:0045944//positive regulation of transcription from RNA polymerase II promoter;GO:0006352//DNA-templated transcription, initiation;GO:0006366//transcription from RNA polymerase II promoter	GO:0044212//transcription regulatory region DNA binding;GO:0008134//transcription factor binding;GO:0046982//protein heterodimerization activity	GO:0000124//SAGA complex;GO:0005669//transcription factor TFIID complex	MAGEDEDLPRDAKIVKTLLKSMGVEEYEPRVIHQFLELWYRYVVDVLTDAQVYSEHAGKPAIDCDDVKLAIQSKVNFSFSQPPPREVLLELARNRNKIPLPKSIAGPGVALPPEQDTLISPNYQLAIPKKQSAQAVEEMEEDEEPAEPNPPQEQKPSDLPQGTPQRVSFPLAKRTK
Prupe.3G064100.1.p	10.3185	7.00208	0.0277437	0.0518881	Up	XP_007217725.1	uncharacterized protein LOC18783032 [Prunus persica]	-	-	-	-	-	-	-	-	-	-	-	-			GO:0016021//integral component of membrane	MPLPPSSSTQRSPTKMLERALSSRRNALYADEAAAENDAVAADESKTKKHLPISFFTTRITNYLTRTGPVWPCLLLLALVLLLIFSLIFNSRRFVCVSPYDPVSRSGFFGFDGLESDFGSLGVPWCRSKHGKTVEWTSKDLIKGLEVFVPIYETRPIKNNQFGMGFDHSFGLWFIAQWLKPDLMIESGAFKGHSTWVLRQAMPDTPIITLTPRHPEKYLKKGPAYVDGNCTYFSGKDFLDFGSIDWRKLMKKHGITDLGRVLIFFDDHQNELKRVRQALKAGFRHLVFEDNYDTGTGDHYSLRQICDQPYIRGGGHSCFKDSDEARIRSRRKKFWEKAVDIDELCGPGEAWWGVRGYMLDDFNNSKSNKLISFSEHFQNSRFVESILDVYWEVPPVAGP…
Prupe.3G075700.1.p	1.17514	0.476019	0.0387898	0.361047	Up	XP_007216862.1	probable 2-oxoglutarate-dependent dioxygenase AOP1 [Prunus persica]	58.15	4e-133	sp|Q945B6|AOP1L_ARATH	Probable 2-oxoglutarate-dependent dioxygenase AOP1.2 OS=Arabidopsis thaliana GN=AOP1.2 PE=2 SV=1	At1g52820	494	2e-177	KOG0143	Iron/ascorbate family oxidoreductases	QR	Secondary metabolites biosynthesis, transport and catabolism;General function prediction only	K05282|1|2e-31|125|ppp:112280324|gibberellin-44 dioxygenase [EC:1.14.11.12]!K04124|3|5e-30|120|tcc:18588669|gibberellin 3beta-dioxygenase [EC:1.14.11.15]!K04125|5|5e-29|118|nnu:104585673|gibberellin 2beta-dioxygenase [EC:1.14.11.13]		GO:0046872//metal ion binding;GO:0016491//oxidoreductase activity	-	MGSETPLKLPVIDFSNQSLTPGTTEWNTVRAQVHNALEEYGCFEALFNKVPPHIRKSIFPSIEELFDLPLQTKLQNVSKKPFHGYVGQYPMVPLYESMGVDDANVYEQVQSLTNTLWPQGNPSFCKTIQSFSEQVSELDQIIRRMILESLGLEKYLEEHLESTNYLLRVMKYKGPQTNETKLGLNAHTDKNIVTILYQNQVDGLEVQNKDGKWINVKPSPDSFIAMIGDSLYAWTNGRLHSPYHRVMMSGNEVRYSTGLFSIPKEGYIIKAPEEVVDEEHPLLFKPFDHVQFLGFYYSEAGQRAHSALKTYCGVQDFAFSN
Prupe.3G075900.1.p	1.35085	0.260625	0.0139432	0.275929	Up	XP_007216816.1	probable 2-oxoglutarate-dependent dioxygenase AOP1 [Prunus persica]	54.31	1e-122	sp|Q945B6|AOP1L_ARATH	Probable 2-oxoglutarate-dependent dioxygenase AOP1.2 OS=Arabidopsis thaliana GN=AOP1.2 PE=2 SV=1	At1g52820	440	4e-156	KOG0143	Iron/ascorbate family oxidoreductases	QR	Secondary metabolites biosynthesis, transport and catabolism;General function prediction only	K04124|1|5e-33|129|tcc:18588669|gibberellin 3beta-dioxygenase [EC:1.14.11.15]!K05282|3|3e-31|124|ppp:112280324|gibberellin-44 dioxygenase [EC:1.14.11.12]!K04125|5|2e-30|122|nnu:104585673|gibberellin 2beta-dioxygenase [EC:1.14.11.13]		GO:0046872//metal ion binding;GO:0051213//dioxygenase activity;GO:0016491//oxidoreductase activity	-	MGSETPLRLPVIDFSNQSLTPGTREWNTVRAQVHNALEEYGCFEALFTKVPSHIRKSIFQSIEDLLDLPLQTKLKNVSRKPYRGYAGQLPMMPLYESMGIDGANVYEQVQSLANTLWPQGNPSFCKTIQSFTEKVSELDQIIRRMILESLGLKEYLEEHLNSTDYLLRVMKYKAPQTNETKLGLPPHTDKNIVTILYQNQVDGLEVQTKDGKWINVKPSSDSFIALIGESLHAWTNGRLHSPIHRVMMNGNEIRYSTGLFSAPKEGYIIKAPNEVVDEEHPLLFKPYEHAQFIAFCNSEAGQRGPFSLKTFCGVQDLTLST
Prupe.3G080300.1.p	1.13953	0.352272	0.0230821	0.31808	Up	XP_007216222.2	probable disease resistance protein At5g63020 [Prunus persica]	41.98	0	sp|Q8RXS5|DRL40_ARATH	Probable disease resistance protein At5g63020 OS=Arabidopsis thaliana GN=At5g63020 PE=2 SV=2	At5g63020	663	0	KOG4658	Apoptotic ATPase	T	Signal transduction mechanisms	K13459|1|0.0|1659|pper:18783314|disease resistance protein RPS2	GO:0006952//defense response	GO:0043531//ADP binding	-	MGSCLSISLSCDAIVSRCWDSVFGRVRYVRKLQENLQALTTSLQELKSLKNDVQREVELAERQPRLRRLELVNNWILSVEALETEINEVIVSHSTQEIEKLCCGGYCSKNYRSSYKYGKKVARKLVEVEDLKSKGVFEEVAAESLPTALVDVIPSEPTVGMEPIFDQVWRHVENEQVGMIGLYGMGGVGKTTLLTQIHNNFNRTRNDFNLVIWIVVSKGHKIEVIQDKIGEKIGLSSGVWKLKMQHEKAEDIFRILNTKKFVLLMDDLWEPVELTKIGVPAPDSRNKFKIVFTTRSEEVCGHMDAQKKIKVGCLTWDKAWNLFQEKVGKETLLLHPDIPKLAEIVANECGGLPLALITVGRVMACKKTPQEWKRAVQVLRRFASEFSGMGDKVFPLLKF…
Prupe.3G081700.1.p	10.4148	7.47474	0.00582007	0.013699	Up	XP_007216032.2	probable polygalacturonase At1g80170 [Prunus persica]	62.8	0	sp|Q94AJ5|PGLR5_ARATH	Probable polygalacturonase At1g80170 OS=Arabidopsis thaliana GN=At1g80170 PE=1 SV=1	-	-	-	-	-	-	-	K01213|1|0.0|952|pper:18782347|galacturan 1,4-alpha-galacturonidase [EC:3.2.1.67]	-	-	-	MRSIRSCPTASKCLIVLIHMLFLLVSSNTANGENFDSFLQLPQSGSTRTRPKSKRVLFVGDFGAKGDGITDDSKAFKNAWEIACSLPMRMRIVIPVGSTYLVHPLDIAGPCRSKVTLMISGNIVAPKDPDAWIGLNPRKWLYFHGVNHLTLEGGGRINGMGQEWWARSCKTNSTNPCRHAPTAVTFHRCKNLKVKDLMIVNSQQMHMAFTNCMRVVASNLRVMAPAVSPNTDGIHISASRGVEVKNSIIRTGDDCISIVSNSSRIRIINIACGPGHGISIGSLGKSNSWSHVHDVLVDVALLSNTDNGVRIKTWQGGSGFASNIAFRNVLMDNVSNPIIIDQYYCDSWLPCLNQSSAVKVENISFVHVKGTSATEEAISFACSDDSPCEGLYLEDIQLQ…
Prupe.3G081800.1.p	-1.04388	0.389695	0.0279816	0.331548	Down	XP_007217377.2	peptide deformylase 1A, chloroplastic/mitochondrial [Prunus persica]	67.64	9e-128	sp|Q9FV53|DEF1A_ARATH	Peptide deformylase 1A, chloroplastic/mitochondrial OS=Arabidopsis thaliana GN=PDF1A PE=1 SV=3	At1g15390	363	2e-127	KOG3137	Peptide deformylase	J	Translation, ribosomal structure and biogenesis	K01462|1|0.0|560|pper:18782679|peptide deformylase [EC:3.5.1.88]	GO:0018206//peptidyl-methionine modification;GO:0043686//co-translational protein modification;GO:0031365//N-terminal protein amino acid modification;GO:0006412//translation	GO:0042586//peptide deformylase activity;GO:0046872//metal ion binding	GO:0009507//chloroplast	METIYRFSLRLAPISLPEKCLQPRTITPIFWKTRIHFSNPGPLNPEPAFNTHFPTRKSYSSGSSPVAKAGWLLGLGEKKKSTSLPDIVKAGDPVLHEPARDVEPGDIGSERIQKIIDDMVKVMRKAPGVGLAAPQIGIPLRIIVLEDTKEYISYAPKEETAAQDRRPFDLLVILNPKLQKKSNRTAVFFEGCLSVDGFRAVVERNLDVEVSGFDRNGQPIKISASGWQARILQHECDHLEGTLYVDKMVPRTFRTVENLDLPLAEGCPKLGGR
Prupe.3G082400.1.p	1.39576	0.253569	0.0118029	0.271426	Up	ONI16173.1	hypothetical protein PRUPE_3G082400 [Prunus persica]	29.9	1e-118	sp|Q7XA39|RGA4_SOLBU	Putative disease resistance protein RGA4 OS=Solanum bulbocastanum GN=RGA4 PE=2 SV=1	At3g14470	340	2e-99	KOG4658	Apoptotic ATPase	T	Signal transduction mechanisms	K19613|1|0.0|579|mdm:103454858|leucine-rich repeat protein SHOC2!K15078|2|3e-150|484|hbr:110659116|structure-specific endonuclease subunit SLX1 [EC:3.6.1.-]	-	-	-	MTEFVTPVVTTVLKKLSSVAIQKLLAVFDVRKDIENLRSSLTNIQLLLNRLENNRMNSSGPTLLNNWLEDLDAAAYDAEDLIESWATEYHQWEMKKQVQKLHLPFSPFNLLFVLRESSKLREVTERIDQHIRNGESYSTIVGNTINRIEDQPQTGPLENSFIVSREEDKKNIIKLLITDEEDDNFSLVSILGMGGLGKTTLARNVIGDKEVGDRFEIIVWACVTKPFKIESILSEIVVSPKTTDTNVSHFTLAKLQERSRGILAGKRFLLVLDNLWNHETNYLDPLLSVLVLGSKGSRVLVTSRFKEVSGIDFKGLKIKPPYNLACLGENESWSLFANFAFKEDSDSDREEFVKYGREIVRKCQGLPLALKQMGALLKSKDLGVWKSIANSQTWREKEK…
Prupe.3G085200.1.p	-10.5112	7.99866	2.17778e-05	0.000118828	Down	XP_007215913.1	26.5 kDa heat shock protein, mitochondrial [Prunus persica]	52.61	2e-76	sp|Q9SSQ8|HS26M_ARATH	26.5 kDa heat shock protein, mitochondrial OS=Arabidopsis thaliana GN=HSP26.5 PE=2 SV=1	At1g52560	230	5e-76	KOG0710	Molecular chaperone (small heat-shock protein Hsp26/Hsp42)	O	Posttranslational modification, protein turnover, chaperones	K13993|1|3e-172|477|pper:18781808|HSP20 family protein	GO:0009408//response to heat;GO:0009644//response to high light intensity;GO:0042542//response to hydrogen peroxide	-	-	MALARLALKNLHQRVLSPASFSAASVLGHGVNERTVDESRGRVGNEIVKRFSTEANEKVSGEKSENKDVAVSQGKRSRLFPRRQRRRGLWRDSDRNFVPALYEFFPSGLGNALLQATENINRLLDNLNISPWSLSGRVKEQSDSYKLQYDVPGLAKEDVKIIVHDGFLEIKGECKEEEEEGLEGWRYGYYDTILQLPDDAKVDDIKAELKDGVLTITIPRTEKPKKDVKEVNVQ
Prupe.3G096500.1.p	10.2778	6.79655	2.563e-05	0.000118828	Up	XP_020416130.1	Golgi SNAP receptor complex member 1-1 [Prunus persica]	83.48	8e-138	sp|Q9LMP7|GOS11_ARATH	Golgi SNAP receptor complex member 1-1 OS=Arabidopsis thaliana GN=GOS11 PE=2 SV=1	At1g15880	385	2e-137	KOG3208	SNARE protein GS28	U	Intracellular trafficking, secretion, and vesicular transport	K08495|1|4e-166|460|pper:18783350|golgi SNAP receptor complex member 1	GO:0015031//protein transport;GO:0006888//ER to Golgi vesicle-mediated transport		GO:0005801//cis-Golgi network;GO:0016021//integral component of membrane;GO:0000139//Golgi membrane	MEVPSSWDALRKQARKIEAQLDELMHSYRKFVSAKGTAKFDTAENDLESGIDRLLKQLQQVNSQMQAWVSSGGSEMVSHTLTRHQEIFQDLTQEFYRLRSSFRAKQEHASLLEDFREFDRTRVDLEDGVGSAENALLKEHAAVSRNTGQMDTVISQAQATLGTLVLQRSTFGGINSKLSNIGSRLPSVNHILAAIKRKKSMDTIILSLVASVCTFLIFIYWLTK
Prupe.3G101600.1.p	10.6574	8.84394	1.96961e-05	0.000118828	Up	ONI16489.1	hypothetical protein PRUPE_3G101600 [Prunus persica]	66.84	0	sp|Q9FI78|HST_ARATH	Shikimate O-hydroxycinnamoyltransferase OS=Arabidopsis thaliana GN=HST PE=1 SV=1	-	-	-	-	-	-	-	K13065|1|0.0|647|pmum:103328213|shikimate O-hydroxycinnamoyltransferase [EC:2.3.1.133]		GO:0016747//transferase activity, transferring acyl groups other than amino-acyl groups	-	MAVNVRVRESMVVKPEEETPKRALWISDLDVVISRTHVGSVYFYRRPNVFKCSLAKALVPFYPVAGRLKLNDEGRIEIDCNAEGVLFLVAETDSVLDDFGDFAPTLEFRKLIPAVDYSAGISSYPLLVLQVTYFKCGGVSLGVGLEHRVADGVSGLHFVNTWSDIARGCDITIPPFIDRTLLRARDPPQPAFHHIEYQPDPPIKTPPRSTNASSVESTTVSIFRLTLEQLNMLKAKSKEDGNTIEFSTFEMLAGHVWRCASNARQLPDDQETKLHVALDGRSRLEPPLQPGFFGNVVFAAAPIAAAGNLKSKPTWYAARCVHDAVVRMDNDYLRSALDYLKLEPDLSSLVRGAHTFRSPRLGIASWARLPIQ
Prupe.3G147100.1.p	-1.19952	0.462416	0.0357347	0.356446	Down	XP_007215398.1	uncharacterized protein LOC18782279 [Prunus persica]	-	-	-	-	-	-	-	-	-	-	-	-		GO:0016787//hydrolase activity	-	MASDLSVILPRVLIVSRRTLRKNKFVDFVGEYHLDLIVGYGAVPVIVPRVNGVHMLLDSFEPIHGVLLCEGEDIDPSLYETEVDVSGLSPEELEEIRRLHASDTAIDKEKDSIEMRLAKLCLERNIPYLGICRGSQVLNVACGGTLYQDIEKELSKKHNENYELKPQNGVQVQHINYDDYDGHRHVVQVVEETPLHQWFKESVEKEGKMEIWVNSYHHQGVKKLAQRFVPMAFAPDGLIEGFYDPDAYNPEEGKFIMGLQFHPERMRRPDSDEFDYPGCPSAYQEFVKAAIAYKNKVNSSTSVPQPLKLDGEMEMKRKKIVRSFSLARNIYSGGLGSGLQRIKESELEAGAEFLESNTALSLQQENRLKQMGATVRNAGSYIERLKLNEERERLARNVM…
Prupe.3G156900.1.p	10.3427	7.11464	0.0192328	0.0373852	Up	XP_007215837.1	probable polyol transporter 4 [Prunus persica]	74.19	0	sp|Q0WUU6|PLT4_ARATH	Probable polyol transporter 4 OS=Arabidopsis thaliana GN=PLT4 PE=2 SV=1	At2g20780	761	0	KOG0254	Predicted transporter (major facilitator superfamily)	R	General function prediction only	K08150|1|3e-87|281|dzi:111279701|MFS transporter, SP family, solute carrier family 2 (myo-inositol transporter), member 13	GO:0046323//glucose import;GO:0035428//hexose transmembrane transport	GO:0005355//glucose transmembrane transporter activity;GO:0005351//sugar:proton symporter activity	GO:0016021//integral component of membrane	MGLVGVGETGNGEMGLSSVALGTKNKYKRMDSQLPDEDEDASQHQLQEKRSKKTRKYVLACAIFASLNSVLLGYDVGVMSGAIIFIQEDLKITEVQEEVLVGILSIVSLFGSLAGGKTSDMIGRKWTMALAAVVFQAGAGVMVFAPSFEILMIGRLLAGIGIGFGVMIAPVYIAEISPTIARGSLTSFPEIFINLGILLGYVSNYAFSGLPAHINWRIMLGVGILPSVFIGFALFIIPESPRWLVIQNRVDEARSVLLKTNENESEVEDRLNEILVAADTSSGGKYEEKSVTRELLSPSPALRRMLITGFGIQCFQQITGIDATVYYSPEIFREAGIEDKTNLLAATVAVGVTKTVFIMVAILLIDKIGRKPLLYVSTIGMTACLFSLAFTLTFLGKGQ…
Prupe.3G188100.1.p	1.36015	0.483869	0.0375047	0.358953	Up	XP_020416652.1	carnosine N-methyltransferase isoform X1 [Prunus persica]	-	-	-	-	At2g32160	478	2e-166	KOG2798	Putative trehalase	G	Carbohydrate transport and metabolism	K19787|1|0.0|1032|pmum:103329018|carnosine N-methyltransferase [EC:2.1.1.22]	-	-	-	MSSVRAAEREMHRGEDEDDERRRQRKLEEALEVKSLRRIISAYLNYPEAAEEDVRRYERSFKILPPSHKALLSHYPLKFQRLRRCISVNSYFIFSMLQAFEPPLDLSQDMDVRDGPHLERVSYNHDVSGVKSVSSSQSNSTSERMHISNSDQACCGEGSSAVCSTPIGVTTKKEVNNEGHCDCITERHTSGREYNREMHNCDGNDAIDSNGDVSSPTRTWLDPSLQLHVPLVDVDKVRCIVRNIVRDWAAEGQKERDQCYKPILEELDSLFADRSKESPPACLVPGAGLGRLALEISCLGFISQGNEFSYYMMICSSFILNHSRTAGEWTIYPWIHSNCNSLSDSDQLRPVSVPDIHPASAGITEGFSMCGGDFVEVYNDPNQVGVWDAVVTCFFIDTA…
Prupe.3G198000.1.p	10.4513	7.66566	2.27239e-05	0.000118828	Up	XP_007215589.2	alpha-1,6-mannosyl-glycoprotein 2-beta-N-acetylglucosaminyltransferase [Prunus persica]	64.45	0	sp|Q9FT88|MGAT2_ARATH	Alpha-1,6-mannosyl-glycoprotein 2-beta-N-acetylglucosaminyltransferase OS=Arabidopsis thaliana GN=GNT2 PE=1 SV=1	At2g05320	576	0	KOG2791	N-acetylglucosaminyltransferase	G	Carbohydrate transport and metabolism	K00736|1|0.0|891|pper:18783149|alpha-1,6-mannosyl-glycoprotein beta-1,2-N-acetylglucosaminyltransferase [EC:2.4.1.143]	GO:0009312//oligosaccharide biosynthetic process	GO:0008455//alpha-1,6-mannosylglycoprotein 2-beta-N-acetylglucosaminyltransferase activity	GO:0005795//Golgi stack;GO:0016021//integral component of membrane	MANIKKNRLKDEVAFRRFLPLVSITLLGVFLLMFLLRINSNFATPSSDDFSQVLTNRSHARHMLSLPKQTEFSLQLEKRNQMPPRNLDLYPSLDKDHITIVLYVHNRPQYLKAAVDSLSRVVGINETLLIVSHDGYFEEMNKIVEGIRFCQVKQIFAPFSPHVFPNSFPGVSPTDCKEKDDATKKQCKGTPDQYGNHRSPKIVSLKHHWWWMMNTVWDGLKETKDHSGHILFIEEDHYIYPNAYRNLQILTELKPQKCPHCYAANLAPCDVNARGEGWDSLIAERMGNVGYTFNRTVWRKIHRKTTEFCFFDDYNWDITMWATVYPSFGNPVFTLRGPRTSAVHFGKCGLHQGQGEARACIDNGMVNFQVEEIDTVANINSDWEVRVFEHQPGYKAGFK…
Prupe.3G209900.1.p	1.25497	0.326969	0.00496	0.240663	Up	XP_007215698.1	1-aminocyclopropane-1-carboxylate oxidase [Prunus persica]	99.06	0	sp|Q9MB94|ACCO_PRUMU	1-aminocyclopropane-1-carboxylate oxidase OS=Prunus mume GN=ACO1 PE=2 SV=1	At1g05010	514	0	KOG0143	Iron/ascorbate family oxidoreductases	QR	Secondary metabolites biosynthesis, transport and catabolism;General function prediction only	K05933|1|0.0|662|pper:18784056|aminocyclopropanecarboxylate oxidase [EC:1.14.17.4]	GO:0009835//fruit ripening;GO:0009693//ethylene biosynthetic process	GO:0031418//L-ascorbic acid binding;GO:0009815//1-aminocyclopropane-1-carboxylate oxidase activity;GO:0046872//metal ion binding;GO:0016491//oxidoreductase activity	-	MENFPIINLEGLNGEGRKATMEKIKDACENWGFFELVSHGIPTEFLDTVERLTKEHYRQCLEQRFKELVASKGLEAVKTEVNDMDWESTFYLRHLPKSNISEVPDLEDQYRNVMKEFALKLEKLAEQLLDLLCENLGLEQGYLKKAFYGTNGPTFGTKVSNYPPCPNPELIKGLRAHTDAGGLILLFQDDKVSGLQLLKDGQWIDVPPMRHSIVINLGDQLEVITNGKYKSVEHRVIAQTDGTRMSIASFYNPGSDAVIYPAPTLVEKEAEEKNQVYPKFVFEDYMKLYAGLKFQPKEPRFEAMKAVETNISLGPIATA
Prupe.3G210700.1.p	10.3947	7.39569	0.0407235	0.0733872	Up	XP_007215327.2	glucan endo-1,3-beta-glucosidase 12 [Prunus persica]	40.54	1e-118	sp|Q9FJU9|E1313_ARATH	Glucan endo-1,3-beta-glucosidase 13 OS=Arabidopsis thaliana GN=At5g56590 PE=1 SV=1	-	-	-	-	-	-	-	K19891|1|3e-136|405|smo:SELMODRAFT_442025|glucan endo-1,3-beta-glucosidase 1/2/3 [EC:3.2.1.39]	GO:0005975//carbohydrate metabolic process	GO:0004553//hydrolase activity, hydrolyzing O-glycosyl compounds	-	MLCFSKNQSMDRHLLTLSLLLLSVLSSHADAASVGVNYGRIADNLPSAYRVMQLLKSQGLERVKVFDSDPAVLRALAGSNIKVTVDVPNELLSSVAKSQSFATNWVQRNVVAYHPNTQIEAIAVGNEVFVDTHNTTKFLIPAMKNIHTALIHFDIHSAIKVSSPIALSALQNSYPASAGSFRPELVETVFKPMLEFLRQTGSYLMVNAYPYFAYESNADVISLDYALFRQNPGVVDAGNGLRYLSLFDAQIDAVFAAMSALKYDDINMVVSETGWPSKGDENEVGASLENAAAYNGNLVRRILTGGGTPLRPKADLTVYLFALFNEDRKNGPTSERNYGLFFPNERKVYDIPFTFEGLKNYHDHRSPVAGNQHMTAPVNGGGDVSKSLTGNTWCVANGE…
Prupe.3G228300.1.p	-1.17202	0.355944	0.0109775	0.269502	Down	XP_007216101.1	equilibrative nucleotide transporter 3 [Prunus persica]	72.13	0	sp|Q9M0Y3|ENT3_ARATH	Equilibrative nucleotide transporter 3 OS=Arabidopsis thaliana GN=ENT3 PE=1 SV=1	At4g05120	622	0	KOG1479	Nucleoside transporter	F	Nucleotide transport and metabolism	K15014|1|0.0|843|pper:18784023|solute carrier family 29 (equilibrative nucleoside transporter), member 1/2/3		GO:0005337//nucleoside transmembrane transporter activity	GO:0016021//integral component of membrane	MGSPDVNRPPPKLEGKYAAMVVCWLLGNGCLFSWNSMLTIEDYYVDLFPRYHPARVLTLVYQPFALGTIIILSYHEAKMNTRKRNLFGYVLFFITSLLVLVLDLATSGRGGLGTFIGICAISAAFGIADAHVQGGMVGDLSFMSGELIQSFLAGLAASGALTSALRLITKAAFENSHNGLRKGAILFFAISSIFELLCVILYAFAFPKLPIVKYYRSKAASEGSKTVSADLAAGGIQTLPEADEEEQRDLERLGNKQLLLQNIDYALDMFLIYALTLSIFPGFLSEDTGSHSLGTWYALVLIAMYNVSDLIGRYIPLVKFLKLENRRGLMVVILSRFLLVPAFYFTAKYGDQGWMIMLTSFLGLSNGYLTVCVLTSAPKGYKGPEQNALGNLLVVFLLV…
Prupe.3G236200.1.p	3.01576	0.580076	0.00652108	0.247452	Up	XP_007215745.1	LOB domain-containing protein 41 [Prunus persica]	60.93	2e-115	sp|Q9M886|LBD41_ARATH	LOB domain-containing protein 41 OS=Arabidopsis thaliana GN=LBD41 PE=2 SV=1	-	-	-	-	-	-	-	K13945|1|2e-08|57.8|csat:104753355|LOB domain-containing protein 29!K21994|5|5e-08|57.8|lang:109350504|LOB domain-containing protein 18	-	-	-	MRMSCNGCRILRKGCSENCSIRPCLQWIKSPESQANATVFLAKFYGRAGLMNLINAGPEHLRPAIFRSLLYEACGRIVNPIYGSVGLLWSGSWQLCQAAVEAVLKGQPITSITSEAAADGHGPPLKAYDIRHVSKDENSAASNEPKQAKTRYRFKRSVVKPKASKVGSGSGSGADDSAKPSCAGCCADEFNRSTSHESSLSHQSEAAANVDGESKETESMVSSETAEAELLFRPEPESARKRSEPVQEGELALELTLGLEPQSRAHHVVPVKKRRIDAYGLGGRSSADDGACKMELGLDLVA
Prupe.3G240600.1.p	-10.6876	9.04232	0.0107179	0.0234708	Down	XP_007215912.1	probable transmembrane ascorbate ferrireductase 2 [Prunus persica]	75.34	6e-124	sp|Q9SWS1|ACFR2_ARATH	Probable transmembrane ascorbate ferrireductase 2 OS=Arabidopsis thaliana GN=CYB561B PE=1 SV=1	At5g38630	351	1e-123	KOG1619	Cytochrome b	C	Energy production and conversion	K08360|1|8e-168|465|pper:18781731|cytochrome b-561 [EC:7.2.1.3]	GO:0055114//oxidation-reduction process		GO:0016021//integral component of membrane	MGAIPVVRFPIFRAVRVIGVIVAALVLIWTIRFRGGLALISDNKDLIFNVHPVLMVIGLILLNGEAMLAYKTVSGTKSFKKLVHLTLQFLAFCLSIIGVWAALKFHNDKGIDNFYSLHSWLGLACLFLFTLQWTAGFVTYWYPGGSKNSRATLLPWHVFVGIYTYALAVVTVTTGILEKVTFLQTNHIISRYSTEALLVNSLGILVVVLGGFVILAVITPTNNNRGDVLRGSIE
Prupe.3G242800.1.p	10.2799	6.8087	0.000185356	0.000628756	Up	XP_007215463.1	protein FLX-like 2 [Prunus persica]	60.24	2e-121	sp|Q84TD8|FLXL2_ARATH	Protein FLX-like 2 OS=Arabidopsis thaliana GN=FLXL2 PE=1 SV=1	-	-	-	-	-	-	-	K00161|1|2e-35|134|gra:105784008|pyruvate dehydrogenase E1 component alpha subunit [EC:1.2.4.1]!K13207|3|4e-25|110|smo:SELMODRAFT_414635|CUG-BP- and ETR3-like factor!K03257|5|5e-20|96.7|nto:104095355|translation initiation factor 4A	-	-	-	MGSKGRIPPAHLRRPLPGPDPFGPGIRPPHGAYPPFDMLPPPQVMEQKLAAQHVEMERLVTENQRLAATHGTLRQELAGAQHELQILHAQIGAIKSEREQQMRGLVDKIAKMEAELKSAEPVKLELQQAGAEAQNLVVSRQELIAKVQQLSQDLQRAHTDVQQIPALVSQLDSLRQEYQHCRATYDYEKKLYNDHLESLQVMEKNYVTMAREVEKLRAELLNNSNVDRRTGAPYYGTPGNNENESTGHAIGQNAYEDSYGVPQGRAPFPPPAAAAGGGATAAGTPPLVGAQPGPPGRTVYDAPRGPGYDASGGSGYDAQRGPGYDAQRGAPYDAQRPGYDVQRPNYEVQRGPGYDPSRGVNYDAQSRGAAGPQGHMPTSNAPYGSATPPARGGSGYEAP…
Prupe.3G246600.1.p	1.14391	0.339559	0.00980288	0.265737	Up	XP_007215352.1	sodium-coupled neutral amino acid transporter 2 [Prunus persica]	74.07	0	sp|Q9LI61|AVT6A_ARATH	Amino acid transporter AVT6A OS=Arabidopsis thaliana GN=AVT6A PE=2 SV=1	At3g30390	700	0	KOG1305	Amino acid transporter protein	E	Amino acid transport and metabolism	K14207|1|0.0|919|pper:18783776|solute carrier family 38 (sodium-coupled neutral amino acid transporter), member 2			GO:0016021//integral component of membrane	MTIGNLAPKKEKKSRKSKGVIDENAPLLPKGQEDVVFDEFNGASFTGAVFNLSTTIVGAGIMALPATMKVLGLVLGISMIIFMAFLTEASIELILRFSRAGKSASYGGLMGEAFGKYGKVLLQISVLVNNLGVLIVYMIIIGDVLSGTSSSGVHHAGVLEGWFGEHWWTGRAIILLVTTLGIFAPLSCFKRIDSLSFTSALSVALAVVFLVITVGITVVKLFNGSIAMPRLLPDVTDVSSFFKLFTVVPVLVTAYICHYNVHSIHNELEDSTQIRGVVQTSLALCSSVYIMTSLFGFLLFGDGTLDDVLANFDTNLGIPYSSVLNDAVRVSYAAHLMLVFPIVFFPLRLNLDGLLFPSARPLVLDNMRFALVTIGLISVIFLGANFIPSIWDAFQFTGA…
Prupe.3G248800.1.p	10.2198	6.52847	2.66826e-05	0.000118828	Up	XP_007217644.1	AUGMIN subunit 5 [Prunus persica]	74.97	0	sp|Q9FMB4|AUG5_ARATH	AUGMIN subunit 5 OS=Arabidopsis thaliana GN=AUG5 PE=1 SV=1	-	-	-	-	-	-	-	-	GO:0051225//spindle assembly		GO:0070652//HAUS complex	MQGSSQSSVAQPEAILQWLQKEMGYRPLGPYSAASKSQLPSIDSLRKICRGNMIPIWNFLITRVKSENTVKNIRRNITVHGGGSGGGDSGALVKSGKEEGVRSKGGRRKEKLGEGSSAAETREAALQERDLASKEVEKLRNIVKRQRKDLKARMLEVSRAEAERKRMLDERSKKRHKQVMLDAYYQQCDEAEKIFAEYHKRLRYYVNQARDAQRSGVDSSLELVNSFSSSSEKEAVYSTLKGSKAADDVLLIETTRERNIRKACESLAAHMIEKIRNSFPAYEGSGVHLNPQLETAKLGFDFDGELPDEVRAAIVNGLKSPPQLLQAITSYTSRLKSLISREIEKIDVRADAETLRYKYENNRVIDVSSPDVSSPLHYQLYGNGKIGVDAPSRGTQLLE…
Prupe.3G250000.1.p	-10.305	6.93271	2.51266e-05	0.000118828	Down	ONI18967.1	hypothetical protein PRUPE_3G250000 [Prunus persica]	76.66	0	sp|Q69F95|C85A_PHAVU	Cytochrome P450 85A OS=Phaseolus vulgaris GN=BA13 PE=3 SV=2	At5g38970	622	0	KOG0157	Cytochrome P450 CYP4/CYP19/CYP26 subfamilies	QI	Secondary metabolites biosynthesis, transport and catabolism;Lipid transport and metabolism	K09590|1|0.0|850|pper:18782277|brassinosteroid-6-oxidase 1 [EC:1.14.-.-]		GO:0004497//monooxygenase activity;GO:0016705//oxidoreductase activity, acting on paired donors, with incorporation or reduction of molecular oxygen;GO:0005506//iron ion binding;GO:0020037//heme binding	-	MAVFMVILCVLFVLCICSALLRWNEVRYRKKGLPPGTMGWPVFGETTEFLKQGPNFMKNQRARYGSFFKSHILGCPTVVSMDPELNRYILMNEAKGLVPGYPQSMLDILGKCNIAAVHGSTHKMALLSSLKQIAGIESSSISCKPFKTEFFKLVLGTLSLPIDLPGTNYRRGFQGRKNIICMLEQLIEERRASQEVHQDMLGCLLSDENRYKLSDEEIIDHIITILYSGYETVSTTSMMAVKYLHDHPKALEELRKEHLAIREKKRPEDPIDWNDLKSMRFTRAVIFETSRLATIVNGVLRKTTQDMELNGYLIPKGWRIYVYTREINYDSFLYPDPLTFNPWRWLDKSLESHNYCLIFGGGTRQCPGKELGIAEISTFLHYFVTRYRWEEVGGDKLTK…
Prupe.3G262100.1.p	-10.1536	6.24163	2.79089e-05	0.000120706	Down	XP_007215541.1	probable WRKY transcription factor 4 [Prunus persica]	51.79	1e-148	sp|Q9XI90|WRKY4_ARATH	Probable WRKY transcription factor 4 OS=Arabidopsis thaliana GN=WRKY4 PE=1 SV=2	-	-	-	-	-	-	-	K08819|1|2e-104|341|brp:103870946|cyclin-dependent kinase 12/13 [EC:2.7.11.22 2.7.11.23]!K18835|4|1e-96|309|han:110873546|WRKY transcription factor 2	GO:0006351//transcription, DNA-templated	GO:0003700//DNA binding transcription factor activity;GO:0043565//sequence-specific DNA binding	GO:0005634//nucleus	MTEKEKRCLLDIASMAKNQDSERVSVSAPPQPQRPVITLPPRPSAESLFSGGSGASPGPMTLVSSFFPDTYPDSEYRSFSQLLAGAMGSPMGSTRPIQFNENPVDGSAQLEGGSENGGENKSGFKQSRPMNLMVARSPLFTVPPGLSPSGLLNSPGFFSPPSPFGISHQQALAQVTAQAALAQSRMHMQAEYQPSSVGAPTEPQAYHPSVMPNEASQQQTLPSTSDHRSSAGQSSEASHSDRKYQPSSVATDRPADDSYNWRKYGQKQVKGSEYPRSYYKCTHLNCPVKKKVERSPNGEITEIIYKGQHNHEAPQPKRGKDGGDLNGHLHSQPRPENGLQRLVGDSNGSSENIASHSMLERHQESTQAAPGQLPGASDSEELRDGEIREEGDADEPNPK…
Prupe.3G269300.1.p	1.01392	0.312718	0.011837	0.271426	Up	XP_007215369.1	tubulin alpha chain [Prunus persica]	98.44	0	sp|P33629|TBA_PRUDU	Tubulin alpha chain OS=Prunus dulcis GN=TUBA PE=2 SV=1	At1g50010	868	0	KOG1376	Alpha tubulin	Z	Cytoskeleton	K07374|1|0.0|939|pavi:110760890|tubulin alpha	GO:0007017//microtubule-based process	GO:0003924//GTPase activity;GO:0005200//structural constituent of cytoskeleton;GO:0005525//GTP binding	GO:0005737//cytoplasm;GO:0005874//microtubule	MRECISIHIGQAGIQVGNACWELYCLEHGIQPDGQMPSDKTVGGGDDAFNTFFSETGAGKHVPRAVFLDLEPTVIDEVRTGTYRQLFHPEQLISGKEDAANNFARGHYTIGKEIVDLCLDRIRKLADNCTGLQGFLVFHAVGGGTGSGLGSLLLERLSVDYGKKSKLGFTVYPSPQVSTSVVEPYNSVLSTHSLLEHTDVAVLLDNEAIYDICRRSLDIERPTYTNLNRLVSQVISSLTASLRFDGALNVDVTEFQTNLVPYPRIHFMLSSYAPVISAEKAYHEQLSVAEITNSAFEPASMMAKCDPRHGKYMACCLMYRGDVVPKDVNAAVATIKTKRTIQFVDWCPTGFKCGINYQPPTVVPGGDLAKVQRAVCMISNSTSVAEVFSRIDHKFDLMY…
Prupe.3G271500.1.p	10.4695	7.76531	0.000156035	0.000550899	Up	XP_007216981.1	FACT complex subunit SSRP1 [Prunus persica]	84.34	0	sp|O04235|SSRP1_VICFA	FACT complex subunit SSRP1 OS=Vicia faba GN=SSRP1 PE=2 SV=1	At3g28730	973	0	KOG0526	Nucleosome-binding factor SPN, POB3 subunit	KLB	Transcription;Replication, recombination and repair;Chromatin structure and dynamics	K09272|1|0.0|1324|pper:18783422|structure-specific recognition protein 1	GO:0006281//DNA repair;GO:0006355//regulation of transcription, DNA-templated;GO:0006260//DNA replication;GO:0006351//transcription, DNA-templated	GO:0003677//DNA binding	GO:0005634//nucleus;GO:0005694//chromosome	MTDGHLFNNISLGGRGGTNPGQLKIYSGGISWKKQGGGKVVEVDKADIVGATWMKVPRTNQLGVRIKDGLYYKFIGFRDQDVTSLTNYFQNTCGLTPEEKQLSVSGRNWGEVDLSGNMLTFLVDTKQAFEVSLADVSQTQLQGKNDVILEFHVDDTTGANEKDSLMEISFHIPNSNTQFVGDENRPPAQVFRDKIMSMADVGAGGEDAVVTFESIAILTPRGRYSVELHLSFLRLQGQANDFKIQYSSVVRLFLLPKSNQPHTFVVVTLDPPIRKGQTLYPHIVLQFETDYVVQSELSMSEELMNTKYKDKLELSYKGLIHEVFTTILRGLSGAKVTKPGKFRSCQDGYAVKSSLKAEDGVLYPLEKSFFFLPKPPTLILHDQIDYVEFERHGAGGSNM…
Prupe.3G280200.1.p	-1.30396	0.187743	0.00225731	0.231705	Down	XP_020415217.1	uncharacterized protein LOC18781735 [Prunus persica]	34.52	9e-06	sp|F4J4Y5|MD26A_ARATH	Probable mediator of RNA polymerase II transcription subunit 26a OS=Arabidopsis thaliana GN=MED26A PE=3 SV=1	At3g48050	733	0	KOG1886	BAH domain proteins	K	Transcription	K04733|1|7e-43|171|ats:109754742|interleukin-1 receptor-associated kinase 4 [EC:2.7.11.1]!K17552|2|7e-07|59.3|mis:MICPUN_54855|protein phosphatase 1 regulatory subunit 10	-	-	-	MHGSPAEKSKRRRHMWPVPHSNATIVASNLSSASDSFCKDGRKICVGDCALFKPPQDSPPFIGIIRRLKLDKEDRLSLGVSWLYRPADVKLSKGVSLEAAPNEVFYSFHKDEIPAASLLHPCKVAFLRKGVELPSGISSFVCRRVYDTENKCLWWLTDKDYINERQEEVDQLLDKTRLEMHGAVQSGGRSPKPLNGPSSTPQLKSGSDSLQNSTSSFSSLIKGKKRERGDQGSEPAKRERLIKTEDGESGQSRPENMLKSELAKITDKGGLVDFEGVEKLVQLMQPESADKKIDLAGRRMLVDVIAVTDRLDCLERFVQLKGVPVLDEWLQEVHKGKIGDGSSPKESDKSVDEFLFALLRALDKLPVNLHALQTCNVGKSVNHLRSHKNSEIQKKARSL…
Prupe.4G037700.1.p	-10.2254	6.56283	0.0135781	0.0282098	Down	XP_007214661.1	vacuolar protein 8 [Prunus persica]	27.7	2e-14	sp|O22193|PUB4_ARATH	U-box domain-containing protein 4 OS=Arabidopsis thaliana GN=PUB4 PE=1 SV=3	At1g61350	624	0	KOG0167	FOG: Armadillo/beta-catenin-like repeats	S	Function unknown	K08332|1|1e-78|263|ppp:112279848|vacuolar protein 8			GO:0005737//cytoplasm;GO:0005634//nucleus	MRTTKMGEEEKGPKETEQSPDLPESSAGASSLRRAVESISSLISLSFSIKIFAAKWNTIRTKLEDLNSGLAAVQNCETDENPVLLGLVSNISGTVNECHGLARRCVDLSYSGKLLMQSDLDMLSAKLDLHARNLSEIYNAGVLTHRFAIVVSRPGNGACRDDMRFYVRDLMTRMKIGGAEMKRQALLNLYEAVVEDDRYVKVVVEQSDIVNVLISLLDSHEAEIQEWSAKVVSVISGFGSYKVVLIGAGIIAPLIRVLECGSEVGKEGAAKSLQRLTENSDNGWSISAHGGVTALLKLCSGCEGGGVRAELVGPACGALKNLVGIEEIKRFMVEEGVISTFIGLTRSKDEVLQINSIEFLQNIASGDEAVRSMVIKEGGIRALVRVLEYRSACSCKVRE…
Prupe.4G042600.1.p	1.33687	0.549247	0.0409456	0.370499	Up	XP_007211884.2	splicing factor 3B subunit 2 [Prunus persica]	-	-	-	-	At4g21660	577	0	KOG2330	Splicing factor 3b, subunit 2	A	RNA processing and modification	K12829|1|0.0|1174|pper:18780256|splicing factor 3B subunit 2			GO:0005634//nucleus	MTAEVLSQPNGVVANGDLNPVSNNATAAKNSKESERRRRRRKQKKNNKASQAPEASAGDESDEGDAKESKVPQQIVEKVEIEYVPEKAALNDGMDEEFRKIFEKFTFQDSAGAEEDKKDELQDGAPQKKADSDADEDEQDNQQKERGGISNKKKKLQRRMKIAELKQICARPDVVEVWDATAADPKLLVFLKSYRNTVPVPRHWCQKRKFLQGKRGIEKQPFQLPDFIAATGIEKIRQAYIEKEDSKKLKQKQRERMQPKMGKMDIDYQVLHDAFFKYQTKPKLTTLGDLYHEGKEFEVKLREMKPGMLSHELKEALGMPDGAPPPWLINMQRYGPPPSYPHLKIPGLNAPIPPGASFGYHAGGWGKPPVDEYGQPLYGDVFGVQQQDQPNYEEEPVDK…
Prupe.4G047000.1.p	-10.5191	8.04296	2.16578e-05	0.000118828	Down	XP_007211713.1	3-deoxy-manno-octulosonate cytidylyltransferase, mitochondrial isoform X1 [Prunus persica]	79.43	8e-166	sp|Q9C920|KDSB_ARATH	3-deoxy-manno-octulosonate cytidylyltransferase, mitochondrial OS=Arabidopsis thaliana GN=KDSB PE=1 SV=1	-	-	-	-	-	-	-	K00979|1|0.0|613|pper:18781204|3-deoxy-manno-octulosonate cytidylyltransferase (CMP-KDO synthetase) [EC:2.7.7.38]		GO:0008690//3-deoxy-manno-octulosonate cytidylyltransferase activity	GO:0005737//cytoplasm;GO:0016021//integral component of membrane	MRGPSSSSSVSDGTNRSWLAQGLLAGSAVAAAAVAYTVISRRRSARLRSHVLGIIPARFASSRFPGKPLVPILGKPMIQRTWERAKLATTLDQLVVATDNEKIAECCLGFGADVIMTSDTCRNGTERCNEALQKFKKKFDIVVNIQGDEPLIEPEIIDGVVKALQAAPDAVFSTAVTSLKPEDASDPNRVKCVVDNHGYAIYFSRGLIPYNKSAKVNPRFPYLLHLGIQSYDAKFLRKYPELAPTPLQLEEDLEQLKVLENGYKMKVIKVDHEAHGVDTPEDVEKIESFMQERNLS
Prupe.4G054400.1.p	-10.2085	6.48376	2.68666e-05	0.000118828	Down	XP_007214436.1	OPA3-like protein [Prunus persica]	-	-	-	-	At1g28510	223	6e-75	KOG3335	Predicted coiled-coil protein	R	General function prediction only	-	-	-	-	MVLPLLKLGTLLLKTLSKPVAARLKQQAGLHPRFRQIIVSMAQANHQVTTRMQRRLYSHATDVEIRPLNEEKAVQAAVDLIGELFVFSVAVAVLIFEVQRNSRSEARKEELRKQELETMKQRDEALSREVVLLRAKFEELEKLAKGRGLSGIINFKRAETEGAKTEKPA
Prupe.4G056300.1.p	10.4568	7.70341	0.0230859	0.0436487	Up	XP_007211914.1	ATP synthase mitochondrial F1 complex assembly factor 1 [Prunus persica]	-	-	-	-	At2g34050	209	9e-68	KOG3281	Mitochondrial F1-ATPase assembly protein	O	Posttranslational modification, protein turnover, chaperones	K07555|1|0.0|521|pper:18779820|ATP synthase mitochondrial F1 complex assembly factor 1	GO:0006461//protein complex assembly		GO:0005739//mitochondrion	MRRASRIISLPASNFIAHASSSACAVNKHSFTTLTAQQNHHNLHLQSFPGDFLKWGSLGFFRTSSFATGFAPLKPKPLGSIIDVERVKDRSAEDIASAWDDFHLGRGHIGASMKANLYHLLEHRAAECRYFVIPLWRGGGYTTMFAQVQTPHMLFTGLEDYKAKGTQAAPYFAVTYYNEFAESKDMVLIRGDVVMPSKLSDSEAKWLLETTQSFYVNDTRYKLVERFNRQTHDFEFKDVLQALEIPNL
Prupe.4G065700.1.p	10.14	6.20272	0.0450674	0.0799658	Up	XP_007214446.1	cellulose synthase A catalytic subunit 8 [UDP-forming] [Prunus persica]	81.45	0	sp|Q8LPK5|CESA8_ARATH	Cellulose synthase A catalytic subunit 8 [UDP-forming] OS=Arabidopsis thaliana GN=CESA8 PE=1 SV=1	-	-	-	-	-	-	-	K10999|1|0.0|2050|pper:18780883|cellulose synthase A [EC:2.4.1.12]	GO:0009834//plant-type secondary cell wall biogenesis;GO:0030244//cellulose biosynthetic process;GO:0071555//cell wall organization	GO:0016760//cellulose synthase (UDP-forming) activity;GO:0046872//metal ion binding	GO:0016021//integral component of membrane;GO:0005886//plasma membrane	MMQSGIPLCNTCGEQVGLDANGEVFVACHECNFPVCKTCFDLDIKEGRKACLRCSTPYDDENSLADDETKVSGTRSAMAAHLDNSQDIGIHARHVSNVSAVDSELNDEYGNPIWKNRVESWKDKKDKKSKKKKGAPKEEKVAQIPPEQQMTENHSPDAAEPLSTIIPLPPNKITPYRVVIIMRLIILALFFHYRVTNPVDSAYGLWLTSIICEIWFAFSWVLDQFPKWYPVNRTTFTDRLSARYEREGEPSELAAVDFFVSTVDPLKEPPLITANTVLSILAVDYPVDKVSCYVSDDGAAMLTFESLAETSEFARKWVPFCKKFSIEPRAPEFYFSQKIDYLKDKVQPSFVKERRAMKRDYEEFKVRMNALVAKAQKTPEDGWTMQDGTPWPGNNSRDH…
Prupe.4G067500.1.p	-10.1943	6.42052	2.71312e-05	0.000118828	Down	ONI10769.1	hypothetical protein PRUPE_4G067500 [Prunus persica]	68.33	0	sp|P38379|SC61A_PYRSA	Protein transport protein Sec61 subunit alpha OS=Pyrenomonas salina PE=2 SV=1	At1g78720	852	0	KOG1373	Transport protein Sec61, alpha subunit	UO	Intracellular trafficking, secretion, and vesicular transport;Posttranslational modification, protein turnover, chaperones	K10956|1|0.0|918|pper:18779582|protein transport protein SEC61 subunit alpha	GO:0015031//protein transport		GO:0016021//integral component of membrane	MGGGFRVLHLVRPFLAFLPEVQSADRKIPFREKFIYTVISLFIFLVCSQLPLYGIHSTTGADPFYWMRVILASSRGTVMELGITPIVTSGLVMQLLAGSKIIEVDNNVREDRALLNGAQKLLGILIAVGQAVAYVLSGMYGSVGQLGVGNAILIIVQLCFAGVIVICLDELLQKGYGLGSGISLFIATNICEGIIWKAFSPTTVNSGRGAEFEGAIIALFHLLITRTDKVRALREAFYRQNLPNVTNLLATVLIFLIVIYFQGFRVVLPLFYTSNMPIILQSALVSNLYFISQLLYRRYGGNFFVNLLGKWQESEYSGGQFIPVGGLAYYVTAPSSLADMAANPFHALFYLVFMLSACALFSKTWIEVSGSSARDVAKQLKEQQMVMPGHRDSNLQKEL…
Prupe.4G092800.1.p	9.98545	5.54878	3.13941e-05	0.000130872	Up	XP_020418495.1	cyclic nucleotide-gated ion channel 1-like [Prunus persica]	37.11	4e-113	sp|O65717|CNGC1_ARATH	Cyclic nucleotide-gated ion channel 1 OS=Arabidopsis thaliana GN=CNGC1 PE=1 SV=1	At5g53130	353	8e-113	KOG0498	K+-channel ERG and related proteins, contain PAS/PAC sensor domain	PT	Inorganic ion transport and metabolism;Signal transduction mechanisms	K05391|1|0.0|1235|pper:109948943|cyclic nucleotide gated channel, plant	-	-	-	MSLQPRVHHLTKIISDAPSKLARCLPSKVRELLTKKWESKLLSASVWNKIIVISCAIAISLDPLFLYIPFIDEKKKCLGMDKKLWNVALILRSLTDITFLVDIGYKIYEGINKAYKEINQGKEQWELDWQTTLIRRHEIIPFAKKIAWELKWCCLVTDLLSVFPMPQLLVKGFFKMWSGYSKPRKAVNFFLLSQYLPRIYRIILSSTELTRTIGIWLKALFNLFLYIIASHVIGAFWYFFSIQRETSCWHQACQNHTEIEGCMGTFSCDHHNTSTPNITFFDEHCKIDVPDNAAAFNYGIFLDSLKSGNAEHINFPTKLCYSFWWGLRNLSNFGTNLATSNYVWENLFAILISVTGLLLFIYLIGNIQTFIQMRTTQSEEIRKKIELKKGDIDEWMKKY…
Prupe.4G101800.1.p	1.05723	0.391838	0.027153	0.331548	Up	XP_007211749.1	coatomer subunit epsilon-1 [Prunus persica]	80.41	0	sp|Q9SA78|COPE1_ARATH	Coatomer subunit epsilon-1 OS=Arabidopsis thaliana GN=At1g30630 PE=2 SV=1	At1g30630	502	0	KOG3081	Vesicle coat complex COPI, epsilon subunit	U	Intracellular trafficking, secretion, and vesicular transport	K17268|1|0.0|603|pper:18778532|coatomer subunit epsilon	GO:0015031//protein transport;GO:0006890//retrograde vesicle-mediated transport, Golgi to ER	GO:0005198//structural molecule activity	GO:0031410//cytoplasmic vesicle;GO:0000139//Golgi membrane	MAAVAAGPDHLFNLRNNFYLGAYQAAINNSELPNLSPDDAVERDCLVFRSYIALGSYQLVINEIDASAATPLQAVKLLALYLTGPDYRESAISSLKELLADPGIGNNPILRLIAGTVFMHEQDYNEALKHTNAGGTMELNALNIQIFLKMHRSDYAERQLRVMQQVDEDHTLTQLANAWLNLAVGGSKIQEAYLIFQDFSEKSQVTSLILNGKAVCCMHMGNFDEAESLLVEALTKDAKDPETLANLVVCYLHLGKSPSRFLSQLKLGHPDHVLVKRAAAAEEGFDRAIQSVA
Prupe.4G135800.1.p	10.398	7.40634	0.00127341	0.00358212	Up	XP_007211686.1	DEAD-box ATP-dependent RNA helicase 10 [Prunus persica]	71.46	0	sp|Q8GY84|RH10_ARATH	DEAD-box ATP-dependent RNA helicase 10 OS=Arabidopsis thaliana GN=RH10 PE=2 SV=2	At5g60990	647	0	KOG0330	ATP-dependent RNA helicase	A	RNA processing and modification	K14777|1|0.0|901|pper:18781080|ATP-dependent RNA helicase DDX47/RRP3 [EC:3.6.4.13]		GO:0005524//ATP binding;GO:0003676//nucleic acid binding;GO:0004386//helicase activity	-	MATDEEKQTTTFKTLGICDELVDACQKLGWTVPTPIQVESMPSALDGKDLIALAQTGSGKTGAFALPILQELINSPQAFFACVLSPTRELAIQIAEQFQALGSEIGVKCAVLVGGVDMVQQSINLAKRPHVVVATPGRLMDHLSNTKGFSLRSLKYLVLDEADRLLNEDFEKSIDEILNVIPRDRRTYLFSATMTKKVKKLQRACLRNPVKIEVASKYSTVDTLNQQYRFLPAKYKDCYLVYILTEKCQCTTMVFTRTCDATQLLALMLRNLGIRAIPISGHMTQSKRLGALNMFKAGECNVLICTDVASRGLDIPSVDMVINYDIPTNSKDYIHRVGRTARAGRYGVAISLVNQYELEWYIQIEKLIDKKLPEFPAEEDEVLLLFERVKEAKRLALKK…
Prupe.4G138300.1.p	1.17562	0.344198	0.0091481	0.265737	Up	XP_007213898.1	feruloyl CoA ortho-hydroxylase 1 [Prunus persica]	47.3	1e-117	sp|Q9LHN8|F6H1_ARATH	Feruloyl CoA ortho-hydroxylase 1 OS=Arabidopsis thaliana GN=F6'H1 PE=1 SV=1	At3g12900	512	0	KOG0143	Iron/ascorbate family oxidoreductases	QR	Secondary metabolites biosynthesis, transport and catabolism;General function prediction only	K23145|1|0.0|760|pper:18778908|scopoletin 8-hydroxylase [EC:1.14.11.60]		GO:0046872//metal ion binding;GO:0016491//oxidoreductase activity	-	MAPSFEDGNSLFNFVVRDGNGVKGMVDLGLSKVPEQYIQPPHERIVKLNAISADELSPIDLSKLDGPDHDQVADAIVNAAEVLGFFQVVNHGMPVELLESLKNAAHDFFGQAPEKKAAYRKGVSPSPYVKYGTSFVPEKEKALEWKDYVSMVYSSDVDALTYWPNECKEVALEYLKFSMDMVKKILKVLIAKLGVTLEDSKIDALIGLRMVNMNFYPTCPDPELTVGVGRHSDMGTLTVLLQDGIGGLYVKVEEDMDAGRKGEWIEISPVPGALVINIGDTLQILSNGRYKSAEHRVRTTSTKSRVSVPIFTIPKQTERIGPLPEVVKNDGVARYREVVFEDYMSNFFGNAHEGKKSLEYAQIIISSTST
Prupe.4G143700.1.p	-10.3541	7.17307	2.42846e-05	0.000118828	Down	XP_007212214.1	photosystem II 10 kDa polypeptide, chloroplastic [Prunus persica]	79.86	2e-76	sp|P06183|PSBR_SOLTU	Photosystem II 10 kDa polypeptide, chloroplastic OS=Solanum tuberosum GN=PSBR PE=2 SV=1	-	-	-	-	-	-	-	K03541|1|7e-96|276|pper:18778431|photosystem II 10kDa protein	GO:0015979//photosynthesis		GO:0016021//integral component of membrane;GO:0009654//photosystem II oxygen evolving complex	MAASVMASVSLKPSPFTVEKSAVRGLPSLARTSSSFKVQASGGKKIKTDTPYGTGGGMNLKDGKDASGRKPTGKGVYQFVDKYGANVDGYSPIYNRDEWSPSGDVYAGGATGLAIWAVTLLGILAGGALLVYNTSALSQ
Prupe.4G148600.1.p	10.4339	7.57485	7.14108e-05	0.000271518	Up	XP_007211610.1	bystin [Prunus persica]	-	-	-	-	At1g31660	543	0	KOG3871	Cell adhesion complex protein bystin	W	Extracellular structures	K14797|1|0.0|939|pper:18780413|essential nuclear protein 1	-	-	-	MGKKRQRERHQNPEPFLAEENGSVASKKQTKSKQHQMEEKLISSGMSSKILKEALAQQREVEDEENRAQNPNNSLLNVTEDPRKDKAAEEEEDIDDFGGFSETQSRFGGYEENDEHDEKLLNEIDEDDENLLEAFLSKSAGPQRTLADLIVARIKEKDSDVSSDARPLPKLDTSLIELYKGVGKFLSKYTAGKVPKPFKHIPSVPRWEDVLYLTEPENWSPNAMYQATRIFASNLGKQKVERFYKLVLLPRVREDIRKHKRLHFALYQSLKKSLYKPAAFFLGILLPLCESGTCNLREAVIFGSIIEKVSIPPLHSSVALMKLAEMKYCGTTSYFIKLLLDKKYALPYRVLDAVVAHFMRFLEETRLMPVIWHQSLLTFVQRYKNELQKEDKDNLRNLL…
Prupe.4G150800.1.p	10.4125	7.46222	2.33435e-05	0.000118828	Up	ONI12206.1	hypothetical protein PRUPE_4G150800 [Prunus persica]	-	-	-	-	-	-	-	-	-	-	-	K00558|1|9e-16|75.9|mdm:103436990|DNA (cytosine-5)-methyltransferase 1 [EC:2.1.1.37]	-	-	-	MKTEVDKSEPAAMATKARGSPYGPNREGQPSRDRPQGKCPHCGMPGHSKSRCFELIGYPENWDRTRDPRCNKSRASVVETKNDSDQIADKASAMIAAAGSDGHPDAEDDWLWY
Prupe.4G182100.1.p	-10.3625	7.21508	2.41431e-05	0.000118828	Down	XP_007212138.1	vacuolar protein sorting-associated protein 25 [Prunus persica]	82.22	2e-112	sp|Q8VZC9|VPS25_ARATH	Vacuolar protein sorting-associated protein 25 OS=Arabidopsis thaliana GN=VPS25 PE=1 SV=1	Hs14150155	136	9e-41	KOG4068	Uncharacterized conserved protein	S	Function unknown	K12189|1|2e-133|374|pmum:103326210|ESCRT-II complex subunit VPS25	-	-	-	MQKLGDFKLPQFFNYPPYFTLQPVRDTREKQIQLWKDLILDYCKTQNVFVIAVEDQDFPLFSNPAIERSLTHEAREAFLSALVSQGRAEWLDKNHRKCLILWHRIQEWANIILEFVKENGLENSVMTVEEIRSGPESRGTELHGIDRTVLMRALKLLEQKGKLAIFKGTTADDEGVKFSA
Prupe.4G196300.1.p	-11.0081	11.2899	0.00126145	0.00357754	Down	XP_020417099.1	uncharacterized protein LOC18779379 [Prunus persica]	-	-	-	-	-	-	-	-	-	-	-	K04733|1|5e-49|190|ccav:112520514|interleukin-1 receptor-associated kinase 4 [EC:2.7.11.1]	-	-	-	MENGHDWKIAEKFPGLTIAGADPIRSSNNSTSNQDGNLLQVMKAMEAAEATIKQQVEENIRLRTQLEHKMLELHRYKLQESMPTQMPPSVDPWAQRLHGSHEQAHQPVAHVDNQIDRIANPAQIHRESETRETQLGSSEINGAMKVVRVSGNQAAAENASSGISRLSSPSTTTSLSPGRSSTEGEYDPQRVNFSGHGLMPLTERNNPSNSLWKKDLVVKVHEHEQEIMQLRKHLADYSIKEAQIRNEKYVLEKRIAYMRLAFDQQQQDLADAASKALSYRQDIIEENIRLAYAVQDAQQERSTFVSSLLPILAEYSLQPPVPDAQSIVGNVKVLFRHLQEKLLLTESKLKELQYQLTPWRSDSNQQPNNISIAAPPSPPSQSIGGGALLNVSRNGLEMV…
Prupe.4G197000.1.p	1.11941	0.239101	0.00542514	0.240663	Up	XP_007214798.1	indole-3-acetic acid-amido synthetase GH3.6 [Prunus persica]	83.61	0	sp|Q9LSQ4|GH36_ARATH	Indole-3-acetic acid-amido synthetase GH3.6 OS=Arabidopsis thaliana GN=GH3.6 PE=1 SV=1	-	-	-	-	-	-	-	K14487|1|0.0|1273|pper:18781401|auxin responsive GH3 gene family	-	-	-	MPEAPKNSLNPSVDYYLQDKNEKALQFIEEVTENADEVQKRVLAEILARNAHVEYLQRHGLNGHTDRDTFKKIIPVIKYEDIEADINRIANGDTSPILCSKPISEFLTSSGTSGGERKLMPTIEEELERRSLLYSLLMPVMSQSVPELDKGKGMYFLFIKSEAKTPGGLVARPVLTSYYKSSHFKRRPYDPYTNYTSPNETILCPDSYQSMYSQLLCGLCQNKEVIRVGAVFASGFIRAIRFLEKHWPSLCKDIASGTLNPQITDSSVREAVMKTLKPDPKLANYIETECGEKSWQGIITRLWPNTKYVDVIVTGTMSQYIPTLDYYSNGLPLVCTMYASSECYFGLNLNPLCKPSEVSYTLVPSMGYFEFLPVQRNNGINSNSLSVPKALNEKEQQEL…
Prupe.4G198000.1.p	10.451	7.66417	0.0025424	0.00676669	Up	ONI13021.1	hypothetical protein PRUPE_4G198000 [Prunus persica]	69.87	3e-116	sp|O23945|PINS_FRAVE	(-)-alpha-pinene synthase OS=Fragaria vesca PE=1 SV=2	-	-	-	-	-	-	-	K15803|1|0.0|617|pper:109948434|(-)-germacrene D synthase [EC:4.2.3.75]	-	-	-	MSFPVAAQVAQSAEPEIVRQTANYHPSIWGDRFLNYDEKSIQITYDHMQQQVDQLKVTVRKEVFTTSAGDFSHQLKLIDAVQRLGVAYHFEREIEEALQRVHVTYHDYDGGDLYAVALGFRLLRQHGFNVSCDIFNKFKDKNGNFKESLTADVPGMLSFYEAAHLRKHGEDILEEALVFTTTHLESAETTEARNPLALQITQALERPLRKGLERVCARGYMSIYQDDASHSEAILKLAKLDFNIVQSLHKKELSEIARWDINCMDELPDYMQVFYRTLLNVYDEIEEEMVKEGRSYRVYYAKEAVKAQARNYFAEAQWLHKDYIPSMEEYMSVATACVGNTLLSITSLVGMGDIVTKEAFEWLLNDPRILRASNIIFRLMDDLSGYEFEKEREHVASSI…
Prupe.4G200000.1.p	-10.2802	6.81454	0.000161835	0.000565605	Down	XP_020418555.1	(-)-alpha-pinene synthase-like isoform X1 [Prunus persica]	64.84	0	sp|O23945|PINS_FRAVE	(-)-alpha-pinene synthase OS=Fragaria vesca PE=1 SV=2	-	-	-	-	-	-	-	K15803|1|0.0|1181|pper:109948960|(-)-germacrene D synthase [EC:4.2.3.75]	-	-	-	MSLEAGSAAQSQCSKPDQIVRHTANFHPSIWGDQFMDYGSEDIIAYSHKQQEVEDLKQVVRREVFTTGAGDFSYQMKLIDAIQRLGVAYHFEKEIEEALEHIYAANRFHDDDDDGDLYDVSLGFRLLRQHGHYVSCRIFNKFKDRKNGGFKESLISDVPGMLSFYEATHLRVHGEDILEEALVFTTKHLESATTHVSYQLAEQIAQALERPLRKSLERVCARRFMSIYQDEASHNEALLKLAKSDFNLVQSLHKQELSEFIRWWKEVDFKRKLPFARDRIVELYFWVVGVYFEPQYLVGRNILTKWIALLTAMDDMYDAFGTFEELEIFTEAVQRLDEFLWDVNCMDELPEYMQIFYRTLLNVFNEIEEEMVKEGRAYGAYYAKEAWKTNAKAYFDEAK…
Prupe.4G200300.1.p	10.4707	7.76932	0.000819631	0.00242387	Up	XP_007213821.1	calcium/calmodulin-regulated receptor-like kinase 1 [Prunus persica]	84.14	0	sp|Q9FIU5|CRLK1_ARATH	Calcium/calmodulin-regulated receptor-like kinase 1 OS=Arabidopsis thaliana GN=CRLK1 PE=1 SV=1	At5g54590	697	0	KOG1187	Serine/threonine protein kinase	T	Signal transduction mechanisms	K04733|1|0.0|882|pavi:110754376|interleukin-1 receptor-associated kinase 4 [EC:2.7.11.1]	GO:0009631//cold acclimation	GO:0004674//protein serine/threonine kinase activity;GO:0005516//calmodulin binding;GO:0005524//ATP binding	GO:0016021//integral component of membrane;GO:0005886//plasma membrane;GO:0010008//endosome membrane	MKGEPAGLIIGVSIGVVIGVLLAISGFFCIRYHRRRLQIGNSSSRRTATIPIRANGADSCTILSDSTVGPDSPVKSGRNGSSFWLEGFKKSNVVSMSGIPQYSYKDLQKATYNFTTLIGQGAFGPVYKAQMSTGETVAVKVLATDSKQGEKEFQTEVKLLGRLHHRNLVNLIGYCAEKGQHMLIYVYMSKGSLASHLYSEKHEPLSWDLRVLIALDVARGLEYLHDGAVPPVIHRDIKSSNILLDQSMRARVADFGLSREEMVDKHAANIKGTFGYLDPEYISTRNFTKKSDVYSFGVLLFELIAGRNPQQGLMEYVELAAMNTEGKVGWEEIVDSRLNGNFHMQELNEVAALAYKCVNRAPKKRPSMRDIVQVLSRMLKMRHNRMHMKSLSSVTDEVT…
Prupe.4G214000.1.p	10.2848	6.82966	2.55057e-05	0.000118828	Up	XP_008226897.1	PREDICTED: uncharacterized protein At4g14342 [Prunus mume]	89.66	3e-58	sp|Q9LW64|SF3BA_ARATH	Uncharacterized protein At3g23325 OS=Arabidopsis thaliana GN=At3g23325 PE=3 SV=1	At3g23320_2	166	2e-55	KOG3485	Uncharacterized conserved protein	S	Function unknown	K12832|1|1e-61|185|pxb:103956264|splicing factor 3B subunit 5	GO:0000398//mRNA splicing, via spliceosome		GO:0071011//precatalytic spliceosome;GO:0005686//U2 snRNP;GO:0005689//U12-type spliceosomal complex	MQASDRFNINSQLEHLQAKYVGTGHADLNRYEWAVNIQRDSYASYVGHYPILAYFALAENESIGRERYNFMQKMLLPCGPPPEREDD
Prupe.4G216300.1.p	-10.4422	7.62619	0.00871336	0.0192027	Down	XP_007214120.2	GDSL esterase/lipase At5g55050 [Prunus persica]	52.33	1e-117	sp|Q9FIA1|GDL87_ARATH	GDSL esterase/lipase At5g55050 OS=Arabidopsis thaliana GN=At5g55050 PE=2 SV=1	-	-	-	-	-	-	-	K14209|1|3e-49|181|ats:109773794|solute carrier family 36 (proton-coupled amino acid transporter)!K00679|2|1e-48|180|cic:CICLE_v10027727mg|phospholipid:diacylglycerol acyltransferase [EC:2.3.1.158]!K10691|3|6e-40|155|ats:109762802|E3 ubiquitin-protein ligase UBR4 [EC:2.3.2.27]!K01188|4|2e-36|145|aly:ARALYDRAFT_316517|beta-glucosidase [EC:3.2.1.21]!K01206|5|1e-26|113|boe:106327403|alpha-L-fucosida…	-	-	-	MIMAPSNVFPITFFFFTFFSVFITLSKAQMVPAIYVFGDSLADVGNNNYLKISLLKANFPHNGVDFPNKKATGRFGNGKNSADFLAEKVGLPTSPPYLSLVSKSNKQNLSFVAGVSFASGGAGIFNGSDEKFRQSIPLSYQVNYYSQVYEDIGLELGSNGAQDHLSKSLFVIVIGSNDIFAYFDSSKLRKESTPNQYVDSMVSNLKQQLERINSLGARKFVVVGTGPVGCCPAQRISNDGDCNEDANSMSIRYNDGLKSMLQQSEAAVHIKYTFFETYGVFSDIIQNGASYGFTETEAACCGFGKLNADSFCLPISSLCSNRTDHVFWDKFHPTEATHGILVDKLFDGPSQYTFPTNVKKLIAL
Prupe.4G238900.1.p	10.4966	7.91262	0.000148665	0.000535812	Up	ONI13694.1	hypothetical protein PRUPE_4G238900, partial [Prunus persica]	57.14	0	sp|Q6Q3H3|TPSGD_VITVI	(-)-germacrene D synthase OS=Vitis vinifera GN=VIT_19s0014g04930 PE=1 SV=1	-	-	-	-	-	-	-	K15803|1|0.0|1006|pmum:103342737|(-)-germacrene D synthase [EC:4.2.3.75]	-	-	-	LAASQAQSPNATLDHVKRRSANFSSSTWGDYFLSYASVKTDIKAEQDVQELKEKVKGMIMAPMLKNPSKKLELIDEIQRFGVSRHFENEVEEVLQQIHKNSYGDDEENDFDLFTTALRFRLLRQQGYKVSCGKDGKFKETLVDDVVGLLSLYEATHLRMHGEDLLDEALTFTTTHLESVEAHRLSPLLAKQVAHALHQPFWKGCQRPEARRYLAIFEEEPHLANETLLTLAKLDFNLVQQVHQKELSEISRWWKDLDFVNKLPFARDRVVECYFWAMGTYFEPQYCFARTSLSKVIAVITAIDDIYDVHGTQEELELFTEAVERWDISAMDQLPEYMKVCYGGMLDVYTEIEEKLGKEGNLYRIHYAREAMKCHVRGYFDEVKWLHQKYTPTMDEYMAV…
Prupe.4G240700.1.p	-1.02273	0.290205	0.00779816	0.261379	Down	XP_007212966.2	(+)-neomenthol dehydrogenase isoform X1 [Prunus persica]	59	6e-117	sp|Q9M2E2|SDR1_ARATH	(+)-neomenthol dehydrogenase OS=Arabidopsis thaliana GN=SDR1 PE=1 SV=1	At3g61220	338	1e-116	KOG1208	Dehydrogenases with different specificities (related to short-chain alcohol dehydrogenases)	Q	Secondary metabolites biosynthesis, transport and catabolism	K15095|1|0.0|605|pper:18779716|(+)-neomenthol dehydrogenase [EC:1.1.1.208]	-	-	-	MAETTKRYAVVTGANKGVGFGTVKQLASNGVTVVLTARDEKRGLEAVDKLKEFGLSDLVVFHQLDVTDPSSITSLADFVKTQFGKLDILVNNAAIAGSQVNPEDFRSAVSGKKPEEIRWREIPTIPNYKLAEESLKTNYYGTKGVTEALLPLLQLSDSPRIVNVSSGVSKLMNFPNGWAKEVLSDAESLTEERIDAVLAEHLEDLKQGLVENKSWPTIFPPYTVSKAAVNAYTRILAKKYTNFYINCVNPGFVNTDITFNTGTLTIEEGAESLVWLALLPNGGPTGHFFSRKEATPF
Prupe.4G273300.1.p	10.6678	8.91134	0.0136972	0.0282098	Up	XP_007212316.1	E3 ubiquitin-protein ligase RGLG3 isoform X1 [Prunus persica]	72.58	0	sp|Q8RX26|RGLG3_ARATH	E3 ubiquitin-protein ligase RGLG3 OS=Arabidopsis thaliana GN=RGLG3 PE=1 SV=1	At5g63970	511	0	KOG1327	Copine	T	Signal transduction mechanisms	K16280|1|0.0|776|pmum:103326935|E3 ubiquitin-protein ligase RGLG [EC:2.3.2.27]	-	-	-	MGNGESTYTDGSYDDSLRELPSHAGTSMDSNHQPKRQSAYIADNFNSLDQVISSLREAGLESSNLILGIDFTKSNEWTGRYSFHRKSLHAIGSTPNPYEQAISIIGRTLSPFDEDNIIPCFGFGDASTHDQCVFSFYPEGRYCHGFEEALARYREIVPLLKLSGPTSFAPIIDAAIDIVENSNGQYHVLVIIADGQVTRSPDTPPGRFSQQEQATVNSIVAASQYPLSIILVGVGDGPWDAMQKFDDNIPQRSFDNFQFVNFTKIMSENTDTSKKEAAFALAALMEIPYQYRATQSLHFVNREPVGGPRTRPLPPPREVINHDNAVKSIPQITNVQKVEPTAPVAPVEPVCPICLTNPKDMAFGCGHTTCKDCGLSLLSCPLCREPISTRLRLYT
Prupe.4G274300.1.p	-10.3801	7.30361	0.00402063	0.0102289	Down	XP_007212034.1	vacuolar protein sorting-associated protein 20 homolog 2 [Prunus persica]	77.52	9e-116	sp|Q9FY89|VP202_ARATH	Vacuolar protein sorting-associated protein 20 homolog 2 OS=Arabidopsis thaliana GN=VPS20.2 PE=1 SV=1	At5g09260	328	2e-115	KOG2910	Uncharacterized conserved protein predicted to be involved in protein sorting	R	General function prediction only	K12195|1|1e-151|423|pper:18780315|charged multivesicular body protein 6	GO:0007034//vacuolar transport		GO:0005622//intracellular	MGNLFVKKPKITEVDRAILSLKTQRRKLAQYQQQLEAVIEAEKQAARDLIREKKKERALLALKKKKAQEDLLKQVDTWVINVEQQLLDIELTSKQQAVFESLKAGNNAIKAIQSEINLEDVQKLMDDTDEAKAYQDEINAILGEKLSAEDEEDILAEFENLEAQITVQDLPKVPASVVSLQRDEELDLPDVPTKAPDAVTYDTEVSSKKKVMEEPLVA
Prupe.5G018600.1.p	10.32	7.00456	0.0209446	0.0401086	Up	XP_020419745.1	mediator of RNA polymerase II transcription subunit 34 [Prunus persica]	72.92	0	sp|Q9FT73|MED34_ARATH	Mediator of RNA polymerase II transcription subunit 34 OS=Arabidopsis thaliana GN=MED34 PE=1 SV=1	At1g31360	1011	0	KOG0353	ATP-dependent DNA helicase	R	General function prediction only	K10899|1|0.0|1464|pper:18777829|ATP-dependent DNA helicase Q1 [EC:3.6.4.12]	-	-	-	METEEILAEELLNVEVEIQGVQDQIKILLDQQERLYERQSELKAILEACKESGYPVNGASTTVEDWSGPFEWDSQADDTRFNIFGISAYRANQREIINAVMSGKDVLVIMAAGGGKSLCYQLPAILRDGVALVVSPLLSLIQDQVMGLAALGIPAHMLTSTTSKEEEKLIYKALEKGEGDLKILYVTPEKISKSKRFMSKLEKCHHAGRLSLISIDEAHCCSQWGHDFRPDYKSLGILKTQFPNVPVIALTATATQKVQSDLMEMLHIPRCVKFVSTVNRPNLFYMVREKSSVGKVVVDEIAEFIRDSCSHNDSGIVYCFSRKECEQVAKELRERGISALHYHADMDVNARENVHMRWSNGKLQVIVGTVAFGMGINKPDVRFVIHHSLSKSMETYYQE…
Prupe.5G034600.1.p	10.3394	7.10171	0.000596246	0.00182567	Up	XP_007208918.1	putative gamma-glutamylcyclotransferase At3g02910 [Prunus persica]	50.57	4e-52	sp|Q9M8T3|Y2910_ARATH	Putative gamma-glutamylcyclotransferase At3g02910 OS=Arabidopsis thaliana GN=At3g02910 PE=2 SV=2	At3g02910	164	6e-52	KOG4450	Uncharacterized conserved protein	S	Function unknown	K19761|1|9e-130|364|pper:18776401|gamma-glutamylaminecyclotransferase [EC:2.3.2.-]	-	-	-	MAEGLKDDAKPHLIFTYGTLKQGFHNHKLTQDLINHDDAVLLGPYITRHSYPLVCGPYGIPYLINLPGSGHQVKGELYSVSTRGLARLDELEGTSIGHYERLPVDVMNADDDIVSVEAQAYYAHRSFGPAMWERIGKAGLSEFTEKEAKGYVKRQDRPCQGRAILEDVRHFVSGM
Prupe.5G040900.1.p	-10.3248	7.02862	2.47837e-05	0.000118828	Down	ONI06107.1	hypothetical protein PRUPE_5G040900 [Prunus persica]	55.9	0	sp|O82302|P2C29_ARATH	Protein phosphatase 2C 29 OS=Arabidopsis thaliana GN=PLL1 PE=1 SV=2	At2g35350	605	0	KOG0700	Protein phosphatase 2C/pyruvate dehydrogenase (lipoamide) phosphatase	T	Signal transduction mechanisms	K01102|1|5e-175|514|mcha:111014810|pyruvate dehydrogenase phosphatase [EC:3.1.3.43]	-	-	-	MGSGVSSLSSCFRPVHRTNHHHPDHNDVVFAASEPLDETLGHSFCYVRSSARFLSPTQSDRFISPSNSLRFSPSHEPGARTRPGLHETGFKAISGASVSANSSTPRTVLQLDNIYDDATDSVLGGFGGGVRGSIVNGFESTSSFSALPLQPVPRGGERDPSGPMERAGFFLSGPIERGALSGPLDPNPNAHGPDGQVHFSAPLGGLYVKRRRKKGISGIRKALYRNFSEKKQRPWVVPVLNFVGRKEGPPPPGDEAEPKSETNVQWALGKAGEDRVHVVVSEEQGWLFVGIYDGFNGPDAPEFLMGNLYRAFYNELQGLFWEVDEDDQAPGTEEANNTNPPNVATESEVVVDVKIDGNDSNSNPLAEADRTKRVTFQSEGRRRRLWELLAEAEAEDGLD…
Prupe.5G055000.1.p	1.23931	0.333029	0.00586013	0.240663	Up	XP_007209886.1	phospho-2-dehydro-3-deoxyheptonate aldolase 2, chloroplastic isoform X1 [Prunus persica]	70.76	0	sp|P37216|AROG_SOLLC	Phospho-2-dehydro-3-deoxyheptonate aldolase 2, chloroplastic OS=Solanum lycopersicum PE=2 SV=1	-	-	-	-	-	-	-	K01626|1|0.0|1115|pper:18778115|3-deoxy-7-phosphoheptulonate synthase [EC:2.5.1.54]	GO:0009423//chorismate biosynthetic process;GO:0009073//aromatic amino acid family biosynthetic process	GO:0003849//3-deoxy-7-phosphoheptulonate synthase activity	GO:0009507//chloroplast	MALTTTATGSANLTTPNPFLSRTTITPPPRNPLKLLNLPKKPNPATIVASSISSSSSSSSSSTLSSATGHLLGPQEWALDSWKSKQAHQLPVYPDPDELQTVLTTLETFPPIVFAGEARRLETWLGKAAVGEAFLLQGGDCAESFKEFNANNIRDTFRVFLQMAITLIYGAQMPVIKVGRMAGQFAKPRSEPFEVKDGVKLPSYRGDNINGDAFDEKSRTPDPQRLLRAYLQSVGTLNLLRAFATGGYAAMQRVADWKLDFVEHSEQGNRYKELAQRVDEAIGFLNAAGATADNPIMNTVEFWVSHECLHLQYEQALTREDSTTGHYYDCSAHMLWVGERTRQLDGAHVEFLRGVSNPLGIKVSDKMDPRELVELCEILNPHNKPGRLTIITRMGADNM…
Prupe.5G055500.1.p	1.00871	0.223086	0.00194572	0.231705	Up	XP_007209708.1	probable ribosome biogenesis protein RLP24 [Prunus persica]	67.07	1e-77	sp|O22165|RLP24_ARATH	Probable ribosome biogenesis protein RLP24 OS=Arabidopsis thaliana GN=At2g44860 PE=1 SV=1	At2g44860	228	2e-77	KOG1723	60s ribosomal protein L30 isolog	J	Translation, ribosomal structure and biogenesis	K02896|1|6e-124|349|pavi:110756410|large subunit ribosomal protein L24e	-	-	-	MRLEKCWFCSSTVYPGHGIQFVRNDAKIFRFCRSKCHKNFKMKRNPRKVKWTKAYRRLRGKDMTQDSTFEFERKRNRPERYDRNLTANTLKAIKKIDKVRVDREARHHEKRMKGKKAKEHREAAKELEQSISLVKAPSVLQQDPSFNLPIKVKVSQQQPDKSLAMMEE
Prupe.5G093800.1.p	-10.5294	8.10554	0.000298617	0.000956679	Down	ONI06994.1	hypothetical protein PRUPE_5G093800 [Prunus persica]	92	1e-10	sp|G5DC91|TLP1_MANZA	Thaumatin-like protein 1 OS=Manilkara zapota GN=TLP1 PE=1 SV=2	-	-	-	-	-	-	-	-	-	-	-	MSTRRSLSTSLLTSLIKPDRTLSASEYSLLSIKRDASLASTRCRRKVRFSGKSEDQISDSYPQDDKTSLFTCPGGTNYKVVFCP
Prupe.5G100400.1.p	10.5411	8.15844	2.13512e-05	0.000118828	Up	XP_020419882.1	kinesin-like protein KIN-14J [Prunus persica]	53.18	0	sp|B3H6Z8|KN14J_ARATH	Kinesin-like protein KIN-14J OS=Arabidopsis thaliana GN=KIN14J PE=1 SV=1	At1g63640	1093	0	KOG0239	Kinesin (KAR3 subfamily)	Z	Cytoskeleton	K10406|1|0.0|2460|pper:18776838|kinesin family member C2/C3	GO:0007018//microtubule-based movement	GO:0008017//microtubule binding;GO:0005524//ATP binding;GO:0003777//microtubule motor activity	-	MNTQSESHKDENGGSKSHKDENGGSKSHKDDKGGFEIINGTRGENAELVESFGSTIEGNQILSLVEWLNFIVPYLRLPLDASEEELRACLIDGTVLCRILNKLCPGSVELGGSSDPGFANITRFLAAVDELGFPRFELLDLEQGSMVPVLHCLSALKASFDFGFWGENTKNQTKTENYLLEVESLKGIDRSRGDVSTCGQQSTQNREDTGGNIIDSTSQVTDPSAALVHHIGQQLKQGTLVDLSSAKILESIKSTSLDNASTRSLFNVGNRILDDSIDRNNGDVPNRVAYILRKVMQVIEQRFANQAVNLRIQNNIYKAREEKFLLKIKVLETLASGTTEENEVVLKLLQSMKIEKFDIEEKKKLEEQDAVRLKEEKDRRDKEISTLKQELEMAKSRHE…
Prupe.5G102900.1.p	10.4296	7.55395	0.0128968	0.0270443	Up	XP_007209129.1	uncharacterized protein LOC18777266 [Prunus persica]	50	2e-47	sp|Q9SRE5|Y1666_ARATH	Uncharacterized protein At1g76660 OS=Arabidopsis thaliana GN=At1g76660 PE=2 SV=1	-	-	-	-	-	-	-	K02218|1|8e-15|79.3|zju:107412057|casein kinase 1 [EC:2.7.11.1]	-	-	-	MRRVNGESRTGNNALETINAAASAIAAAENRVPQATVQKRRWGSWWSMYWCFGFQRHKKRIGHAVLVPETTDRGGDAPRAENPIQTPSIVLPFVAPPSSPASFLQSEPPSATQSPAGFFSLTASMYSPSGPTSIFAIGPYAHETQLVSPPVFSTFTTEPSTAPFTPPPESVHLTTPSSPEVPFAQLLDPHFRNGEGGQRFPLSHYEFQSYQLYPGSPVGQLISPSSGISGSGTSSPFPDLEFAARGHHFLEFRTGDPPKLLNLDILSTRDWGSRLGSGSVTPDGAKSTSSDGFLLKPQTPEVVLNPRSNNRGRNNDISINHRVSFELSSEEVIRCVEKKPVALAEAVSTSLEDTEKAQSKEDPSKVVSSSICPVGETSNDAAEKAVADGEEAQLHPKQR…
Prupe.5G116400.1.p	-10.6288	8.6786	2.00714e-05	0.000118828	Down	ONI07382.1	hypothetical protein PRUPE_5G116400 [Prunus persica]	37.96	2e-70	sp|Q7PCC4|ANRCH_VITVI	Anthocyanidin reductase ((2S)-flavan-3-ol-forming) OS=Vitis vinifera GN=ANR PE=1 SV=1	At1g61720	190	5e-57	KOG1502	Flavonol reductase/cinnamoyl-CoA reductase	V	Defense mechanisms	K21102|1|6e-69|224|vvi:100232981|anthocyanidin reductase [(2S)-flavan-3-ol-forming] [EC:1.3.1.112]!K08695|2|4e-67|219|nnu:104604944|anthocyanidin reductase [EC:1.3.1.77]	-	-	-	MITSFLFGGPIIKWARTQIAFTEKRQRATMEKNKISRVCVTGGAGFIGCSLVKKLLEQGHTVHATLRNLEDASKVGLLKSLPNADTKLLLFQADIYDPNEFQPAIQGCEFVFHVATPMQHNNQSSQYKDTAEAAVAGVRIIAESCIRSQTVKRLIYTASILAASPRREDGVGFKPCLDESCWTSLDVSPTYSTEFSMGYIISKTLAERAVLSYNDIDNGKLEVVTLPCGLVGGETLLSYLSGSVGVVISQLTGDSFGYNSLKLMQEVNGSVPLVHIEDVCQAHIFCMEQPSMRGRFCCAVSSLNIKEIASYFQENYPEHKIAKEFIEGPEEGSKCDFSKLMKMGFEYKYGVKNILDDSVESGRRLSRSSHSQLI
Prupe.5G128800.1.p	-10.535	8.13219	2.14202e-05	0.000118828	Down	XP_007211072.1	uncharacterized protein LOC18776231 isoform X1 [Prunus persica]	-	-	-	-	-	-	-	-	-	-	-	K07897|1|1e-07|56.2|apro:F751_6593|Ras-related protein Rab-7A			GO:0016021//integral component of membrane	MVSIHFSSTIHRLKPPPPHPSQLCNLKPSFLSKSNKSPNTRKKIGTRYRTCRAEFSNDAPFAAAIGACMLSSLVLPVTTPEDDGGGGSPMDSTDARFAVMGIVSFIPYFNWLSWIFAFLDTGKRRYAVYALVYLVPYLRSNLSLSPEESWLPIASIVLCIIHVQLEASIKNGDLQGFQLFSEAAKHTSFTSRKKDLTGHEGTSEEGRKRENKNLPSSEEIGRWGVPKNPLQDHEHSNEDWDDDERSKH
Prupe.5G144500.1.p	10.4955	7.90449	2.20373e-05	0.000118828	Up	XP_007209152.1	sialyltransferase-like protein 2 isoform X1 [Prunus persica]	78.38	0	sp|Q8RY00|SIA2_ARATH	Sialyltransferase-like protein 2 OS=Arabidopsis thaliana GN=SIA2 PE=2 SV=1	At3g48820	667	0	KOG2692	Sialyltransferase	G	Carbohydrate transport and metabolism	K03368|1|7e-137|395|oeu:111377827|beta-galactoside alpha-2,3-sialyltransferase (sialyltransferase 4B) [EC:2.4.99.4]!K06614|3|4e-59|197|pvu:PHAVU_001G0849001|alpha-N-acetyl-neuraminate alpha-2,8-sialyltransferase (sialyltransferase 8D) [EC:2.4.99.-]!K00780|4|1e-10|67.4|bpg:Bathy14g02010|beta-galactoside alpha-2,3-sialyltransferase (sialyltransferase 4A) [EC:2.4.99.4]!K00779|5|7e-10|65.9|bpg:Bathy1…	GO:0009860//pollen tube growth;GO:0006486//protein glycosylation;GO:0009846//pollen germination	GO:0008373//sialyltransferase activity	GO:0005802//trans-Golgi network;GO:0005768//endosome	MRLLQLAFVVSLLFGLVAILIYITGVSDLYETHRLTEEDVEALQSLQTGFQKCVAANGLGLQASIGKDYCQVTMQFPGDTIPKWKDAKTGELEGLSYEFNLCEAVATWEQVRNSTTILTREFIDSLPNGWENYAWHRINKGDRLNRCKNKTLCVEKLSLVLPETPPYVPQMFGRCAVIGNSGDLLKTRFGKEIDGYDAVIRENGAPIQNYTDHVGKKSTFRLLNRGSAKALDKVVELDESRKEVLIIKTTIHDAMNQMIRELPIKNHVYLLLGASFGSAAKGTGLKALEFALSICDSVDMYGFTVDPGYKEWTRYFSESRQGHTPLHGRAYYQMMECLGLIKIHSPIRADPNRVVQWVPDRSAVTAARIASEKLLRRIGAGYAHPLRMCSIITKQVKIK…
Prupe.5G147000.1.p	10.5683	8.31345	0.000682469	0.00203564	Up	XP_020420495.1	protein MICRORCHIDIA 7 [Prunus persica]	55.01	0	sp|F4KAF2|MORC4_ARATH	Protein MICRORCHIDIA 4 OS=Arabidopsis thaliana GN=MORC4 PE=1 SV=2	At5g50780	840	0	KOG1845	MORC family ATPases	D	Cell cycle control, cell division, chromosome partitioning	-	-	-	-	MEATVKQELLETSNVPHPTGKPNGVTSKVVPPPGWVIDLSTSSSSSSSSGESDSDDSDDVGGVSGGLAKKRKRDGMGVVLPVGFLSPLPPEGVAPMLPAPDAAVTRVENTGVVSRPRCKQFWKAGDYEGAPCGNWESTAGGMDHVRVHPKFLHSNATSHKWALGAFAELLDNALDEVCSGATYVNLDMVENKKDQSRMLLIEDNGGGMDPDKMRHCMSLGYSAKSKVANTIGQYGNGFKTSTMRLGADVIVFSRCNGKDGKSATQSIGLLSYTFLKSTGKEDIVVPMLDYERRQGAWSKMLRSSLSDWNKNVETIVQWSPFSNEEDLHHQFYMMKNHGTRIIIYNLWEDDEGQLELDFDADPHDIQIRGVNRAEKNIQMAKEFPNSRFFLTYRHSLRSY…
Prupe.5G152900.1.p	1.00335	0.380498	0.0298545	0.335686	Up	XP_007209430.1	cycloeucalenol cycloisomerase isoform X1 [Prunus persica]	81.72	1e-170	sp|Q9M643|CCI1_ARATH	Cycloeucalenol cycloisomerase OS=Arabidopsis thaliana GN=CPI1 PE=2 SV=1	-	-	-	-	-	-	-	K08246|1|0.0|588|pper:18777316|cycloeucalenol cycloisomerase [EC:5.5.1.9]			GO:0016021//integral component of membrane	MGGKESAFSCSSLWLAPNPSKRWGEVFFLLYTPFWLTLCLGIVVPLKLYESFTELEYLLIGLVSAVPAFLLPMLFVGKADSSLPWKDRYWVKASLWIIIFSYVGNYFWTHYFFTVLGASYTFPSWKMNNVPHTTFLLTHVCFLFYHVTSNITLRRLRHFTAELPERVQWVTEAAWILALSYFIAYLETVAISNFPYYQFVDRASMYTVGSLFYAIYFIVSFPMFLRIDEKPGNPWDLPRVAIDALGAAMLVTIILDLWRIFLGPIVPIPETKLCLQPGLPWFPGHDDQH
Prupe.5G172900.1.p	10.5989	8.49476	0.0120989	0.0255258	Up	XP_020419520.1	serine/threonine-protein kinase ATM [Prunus persica]	35.29	1e-31	sp|Q9M3G7|ATM_ARATH	Serine/threonine-protein kinase ATM OS=Arabidopsis thaliana GN=ATM PE=2 SV=1	At3g48190	135	2e-31	KOG0892	Protein kinase ATM/Tel1, involved in telomere length regulation and DNA repair	TBLD	Signal transduction mechanisms;Chromatin structure and dynamics;Replication, recombination and repair;Cell cycle control, cell division, chromosome partitioning	K04728|1|0.0|2196|pmum:103338375|serine-protein kinase ATM [EC:2.7.11.1]	-	-	-	MENPRTPETLEAQNPSGKTLEEGSGLLEWSENCTGLESFSDILGGSGERVNVTGNDVGLGTVEVAAQVLEAEKGTLDGIKGGDLELGVDSMSGVLNSCVKGVGAEEVVLVNGESDGDNEAQMGSKQLQPDKEKDVQMGSVEPQSDGSLEGLGGDESKKDGDQKMAEDDGMNEDKALGPNGIDTASKKIEVSGEGISLFVDFSGPPPGFNENDLHVTSFPGYESKENLEEFGDDEQENSIDYQDYDFAVGDIIWVKTKTQTWWPGKIYDPVDASKYGASDEQGGCQLVGYFGMSHVAWCHPYQLKPFYEYFEQMSGQNKARIFLGAVEKALEEFGRRVKLNMTCMCVLKENRLSVGGAASDEGVPMLERKSGELGEFTITHFNSAEFLAHLKNLAQVVSS…
Prupe.5G183100.1.p	1.0741	0.254745	0.00835701	0.265737	Up	XP_007209604.2	germin-like protein subfamily T member 2 [Prunus persica]	60.73	7e-89	sp|Q9LMC9|GLT2_ARATH	Germin-like protein subfamily T member 2 OS=Arabidopsis thaliana GN=At1g18980 PE=2 SV=1	-	-	-	-	-	-	-	-		GO:0030145//manganese ion binding;GO:0045735//nutrient reservoir activity	GO:0005576//extracellular region	MNMITSSSLVFSLLFCLMVSMLLLPLPSNGADPDPLQDFCVADLNASTSVNGFPCKPVSKTTSDDFFFDGLSKEGNTSNPFGANLTAGNVLAFPGLNTLGISMNRVDFAPGGINPPHSHPRASESGVVIEGKLLVGFVTTNNVFYSKVLSAGQMFVIPRGLVHFQLNVGEGKALAFTAFNSQLPGAVVLPLTLFASMPSIPDQVLTKALQVDKDVINTIRSKFGF
Prupe.5G206800.1.p	1.23771	0.415728	0.0176752	0.29077	Up	ONI08895.1	hypothetical protein PRUPE_5G206800 [Prunus persica]	65.49	4e-41	sp|B3H4F1|SP1L1_ARATH	Protein SPIRAL1-like 1 OS=Arabidopsis thaliana GN=SP1L1 PE=2 SV=1	-	-	-	-	-	-	-	K18635|1|2e-77|228|pmum:103338561|protein SPIRAL1 and related proteins	-	-	-	MGRGVSSGGGESSLGYLFGGGEEIKKPAPKKVDAPQNQAPVPSTEPPSQKPTAPTTPAEVNKQTPAGVPGNTSNNYFRADGQNCGNFLTDRPSTKVHAAPGGGSSLDYLFGGGSN
Prupe.5G208500.1.p	10.5537	8.23427	0.0157985	0.031597	Up	XP_007209500.1	truncated transcription factor CAULIFLOWER A isoform X1 [Prunus persica]	67.72	8e-119	sp|Q42429|AGL8_SOLTU	Agamous-like MADS-box protein AGL8 homolog OS=Solanum tuberosum PE=2 SV=1	At1g69120	284	1e-96	KOG0014	MADS box transcription factor	K	Transcription	K09264|1|0.0|525|pper:18776358|MADS-box transcription factor, plant	GO:0045944//positive regulation of transcription from RNA polymerase II promoter;GO:0006351//transcription, DNA-templated	GO:0003700//DNA binding transcription factor activity;GO:0000977//RNA polymerase II regulatory region sequence-specific DNA binding;GO:0046983//protein dimerization activity	GO:0005634//nucleus	MGRGRVQLKRIENKINRQVTFSKRRSGLLKKAQEISVLCDAEVALIVFSTKGKLFEYSTDSCMERILERYERYSYSEKQLLANDHESTGSWTLEHAKLKARVEVLQRNCSHFMGEDLQSLSLKELQNLEQQLDSALKHIRSRKNQVMYESISELQKKDKALQEQNNLLAKKVKEKEKALAPQAESWEQQVQNQGLDCSSTLLPEALQSLNFGSGSNYQGIRNDGSGGDHEDENETPTANRPNTLLPPWMLRHLNE
Prupe.5G217300.1.p	10.4415	7.61384	2.28786e-05	0.000118828	Up	XP_007209075.1	DNA mismatch repair protein MSH2 [Prunus persica]	75.8	0	sp|O24617|MSH2_ARATH	DNA mismatch repair protein MSH2 OS=Arabidopsis thaliana GN=MSH2 PE=1 SV=1	Hs4557761	730	0	KOG0219	Mismatch repair ATPase MSH2 (MutS family)	L	Replication, recombination and repair	K08735|1|0.0|1952|pper:18777066|DNA mismatch repair protein MSH2	GO:0006298//mismatch repair	GO:0005524//ATP binding;GO:0030983//mismatched DNA binding	GO:0032300//mismatch repair complex	MDANFEDQSKLPELKLDAKQSQGFLSFFKTLPHDPRPIRLFDRRDYYTAHGENATFIAKTYYRTTTALRQLGSGLDGLSSVSVSKNMFETIARDLLLERTDHTLEIYEGSGSSWRLVKSGTPGNLGSFEDVLFANNDMQDTPVVVALLPNFRENGCTVGLGYVDLTKRVLGLAEFLDDSHFTNVESALVALGCKECLLPLESGKTSEIRTLHDALNRCGVMLTERKKAEFKMRDLVQDLSRLVKGSIEPVRDLVSGFEFAAGALGALLSYAELLGDESNYGNYSIQRYNLDSYMRLDSAAMRALNVLESKTDANKNFSLFGLMNRTCTAGMGKRLLHMWLKQPLLDVDEINSRLDLVQAFVEDPALRQDLRQHLKRISDIERLMHNLEKKRAGLQHIVK…
Prupe.5G218900.1.p	-10.1217	6.10512	2.8533e-05	0.000121882	Down	XP_007209484.1	peptidyl-tRNA hydrolase, chloroplastic [Prunus persica]	79	8e-117	sp|Q8GW64|PTHC_ARATH	Peptidyl-tRNA hydrolase, chloroplastic OS=Arabidopsis thaliana GN=At1g18440 PE=2 SV=2	At1g18440	305	4e-104	KOG2255	Peptidyl-tRNA hydrolase	J	Translation, ribosomal structure and biogenesis	K01056|1|0.0|533|pper:18776766|peptidyl-tRNA hydrolase, PTH1 family [EC:3.1.1.29]		GO:0004045//aminoacyl-tRNA hydrolase activity	GO:0009507//chloroplast	MNVAASLSSIATVRFPNCHRCFRSSKTLIPSSSLRIMSQFSSSPSASSAPPMSSNTAAVESKKPPKQPWLIVGLGNPGKKYHSTRHNVGFEMVDAIAEAEGISLSSVSFKALVGKGLIGDVPVIFAKPQTFMNKSGESVGSIVSYYKIPLKQVLVIFDDLDLPFAKLRLLPKGGHGGHNGMRSVIDHFKGSRDFPRLRIGIGRPPGKMDPVNFVLRPFTKQELEELNFTFQDGVEAVRILLLEGFNKSATFVNSAKPLEQCG
Prupe.5G222900.1.p	10.2579	6.71147	0.00061836	0.00186046	Up	XP_020419967.1	AMSH-like ubiquitin thioesterase 1 [Prunus persica]	60.35	0	sp|Q8VYB5|AMSH1_ARATH	AMSH-like ubiquitin thioesterase 1 OS=Arabidopsis thaliana GN=AMSH1 PE=2 SV=1	At1g48790	610	0	KOG2880	SMAD6 interacting protein AMSH, contains JAB/MPN/Mov34 domain	T	Signal transduction mechanisms	K11866|1|0.0|1051|pper:18776070|STAM-binding protein [EC:3.4.19.12]	-	-	-	MRSSCSDRINIAASAQKLDVDNRIPLRIYFRIANNILKQADIFRQERNIIDLYIMLLRFSSLVSETIPCHRDYRASVQREKVFLKKKLFNALNELEELKPAVKQKNDEFNRRNENQNNGWGRNHQIAAVIQSPLKKQTLSSYDLTKAGQFSYQTPRAQQVSYSRPVEDQFRKLSVSIPLPREETLSRHSILGPNGLHGQWQPPRSDIGVRYPSILDLTPIEIPRLGQSIEEEHTIIKDTSNSEPEKSTLDPILTQNTDDGPMLPTEELHSLISFESTETPDHTKIIRQPSPPPVLAEVQDLIPAVSPQVPEVECGLETLSSDDLLRAESPLQLHISTTMMEHFMKLAKSNTDKNLETCGVLAGSLKNRKFFVTALIIPKQESTSDSCQTTNEEEIFEVQ…
Prupe.6G026700.1.p	1.13285	0.222719	0.000945543	0.187839	Up	XP_020421867.1	GBF-interacting protein 1-like [Prunus persica]	48	3e-28	sp|Q8VZS6|GIP1_ARATH	GBF-interacting protein 1 OS=Arabidopsis thaliana GN=GIP1 PE=1 SV=1	-	-	-	-	-	-	-	K19307|1|3e-27|119|pavi:110755617|25S rRNA (uracil2634-N3)-methyltransferase [EC:2.1.1.313]!K00876|2|2e-25|117|aly:ARALYDRAFT_314795|uridine kinase [EC:2.7.1.48]	-	-	-	MSGGGETRVSIPNNVKETIQDIREITKKQHSDDEIYAVLKECSMDPNETAQKLLYLDTFHEVKRRKDRRKENLKVRASEDSRMPPGTQRRVSRGGGQGNYSSSISSDAGGGRNASARRENGVSQVADRVSMPSSVKPVIQKTKNIAATSMPIASTGTPNGVTNLSNGSSIQSSAPKSPMSVDNNVREGGSAVDVKKLGAAASRPAPVTSTPTFGSLDHEKPVSIPAQLPISAPPASASSVYSSASDPAVSNHVQENKKGSVDAIGLESSKSVKRASRSANSVVVAEKNWNIKPSQPHFSSNDDGSLAKLPSKSVKQSQLESAVPLKVVTLEVATNAVEATSQVPRDSSLSVAKHVTFPNHIQVPEALKNVLTFGSIDATFGPRVDSVNGTGGDNFSIGA…
Prupe.6G027700.1.p	10.9862	11.1086	1.56805e-05	0.000118828	Up	ONH99386.1	hypothetical protein PRUPE_6G027700 [Prunus persica]	56.71	1e-46	sp|F4I171|MD15A_ARATH	Mediator of RNA polymerase II transcription subunit 15a OS=Arabidopsis thaliana GN=MED15A PE=1 SV=1	-	-	-	-	-	-	-	K14972|1|8e-78|260|pavi:110760141|PAX-interacting protein 1	-	-	-	MDNNNWRPPQVGEPPIDAGDWRSQLQPDSRQRIVNKITDTLKRHLPFSGQEGLQEIRKIAVRFEEKIHTAATSQSDYLRKISLKMLSMETNSQHRMANSSQSNSAVGSFGVQPQVPYQGQLLSMQLSANQSLARQQLLSQNIPNNIPPASGLPQTPIPNLMDTHNERLLQGGELPMVAGNWRSQLLPDSRRRIVDKILNTLKRHLLVSGQEGIDELRRIAERFEERTYDSSSSQSDYLRRISLKMLTFEAKYQWTAPTAAPSNLKRHRVFP
Prupe.6G037800.1.p	10.4625	7.7254	2.25482e-05	0.000118828	Up	XP_007205824.1	uncharacterized protein LOC18774506 [Prunus persica]	40.86	2e-14	sp|P51204|YCF54_PORPU	Uncharacterized protein ycf54 OS=Porphyra purpurea GN=ycf54 PE=3 SV=1	-	-	-	-	-	-	-	-			GO:0009579//thylakoid;GO:0009507//chloroplast	MSGVATLGQACWAAAGVKVKKAKTAISQAQIQNPKPKSLALPLSANCSRNLFSFSPKAITKPSSSSSVRTSVAAVDSDQLSSSDSAEKQKASRYYFVVANAKFMLDEEEHFQEQLCERLRYYGERNREQDFWLVIEPKFLDKFPNITKRLGRPAVALVSTNGPWITFMKLRLDRVLAESFEAESLEEALASTPTNIEFEKPEKWVAPYSKYESGWWGPFLPPGSNEEAKV
Prupe.6G044900.1.p	10.3142	6.97015	0.00286476	0.00750913	Up	XP_007206416.2	cationic peroxidase 1 [Prunus persica]	71.43	3e-162	sp|P22195|PER1_ARAHY	Cationic peroxidase 1 OS=Arachis hypogaea GN=PNC1 PE=1 SV=2	-	-	-	-	-	-	-	K00430|1|0.0|654|pper:18771961|peroxidase [EC:1.11.1.7]	-	-	-	MAFISHYNRFCFFVLLMLLRIASAQLSSDYYATTCPRALSVVRSSVINAVVKEHRMGASLLRLHFHDCFVNGCDASVLLDDTSNFTGEKTALPNVRSLRGFEVIDTIKSQLESLCPGVVSCADILAVAARDSVLLFGGPSWTVQLGRRDSTTASLSDANTELPSPSLDLKDLISSFSTKGFSAKEMVALSGSHTMGQARCQMFRDRIYNETNINSEFATFLKSNCTQSSGTDDNLSPLDITSPVFFDNAYFKNLVDSKGLLHSDQQLFSGGSTDSLVTTYSNSSGTFYTDFANAMLKMGNLSPLTGTSGQIRTNCRKTN
Prupe.6G055800.1.p	10.0868	5.95488	0.0120276	0.0255258	Up	XP_007208077.2	U-box domain-containing protein 44 [Prunus persica]	31.03	1e-91	sp|Q9SFX2|PUB43_ARATH	U-box domain-containing protein 43 OS=Arabidopsis thaliana GN=PUB43 PE=2 SV=1	At1g76390	310	3e-91	KOG0167	FOG: Armadillo/beta-catenin-like repeats	S	Function unknown	K08332|1|1e-44|179|han:110918331|vacuolar protein 8		GO:0004842//ubiquitin-protein transferase activity	-	MTSSSSYSSSVSSAVDSIHTSLADLCAPHYHQSPFDLPRRFSGFANRLQLSLTHLTRATSSLDALPPSVHTAFKGIASDLAAALETLSFYRTKGKISVLINCLSLCDSLADRTVAISGWLALLDLAIQDLNLPDLRKKIADLSRDMKQAHFKVTEREERVHHTLQKEGRTTQSKTSKAVESAIIMDLARALGIDPENHDELSKQIRLLKNDVAGSNSVSERRILVSLERIVDNWAIRPNISAWKAGMEFEDDDVHISPFKNFLCPLTKEVMRYPVVLQSSQTYERTAINYWFERCLEDGRDPTCPVTGEVLGSLEMKPNIGLAGAIEEWVNRNVEILVKISVQHLSKEPPVVDCLEGVLDNVYNISEEYPSCRYKVRNAGVLVLIVKMLRNSSKSIGTN…
Prupe.6G062500.1.p	-10.4449	7.63931	0.000616503	0.00186046	Down	XP_007208148.1	calmodulin-binding receptor-like cytoplasmic kinase 2 [Prunus persica]	52.24	1e-146	sp|Q9FIL7|CRCK1_ARATH	Calmodulin-binding receptor-like cytoplasmic kinase 1 OS=Arabidopsis thaliana GN=CRCK1 PE=1 SV=1	At5g58940	408	3e-139	KOG1187	Serine/threonine protein kinase	T	Signal transduction mechanisms	K04733|1|0.0|872|pavi:110762856|interleukin-1 receptor-associated kinase 4 [EC:2.7.11.1]		GO:0004674//protein serine/threonine kinase activity;GO:0005524//ATP binding	-	MKNTPSPHNLHSNRRKPISNFQYEDANNNKPKHQRFAALKAAVKKVAGVFKILLFGQREAIPKGAAVIDTRTNTRISGISSSTDISTWSDTKSSSKFKLSQSNNSSSALSGVIETKNFSYEEIFKATEKFSPANKIGEGAFGTVYKGRLGDGSLVAVKRAKKATYDKLIALEFKNEILTLSMIEHLNLVRLYGYLEHGDERIIVVEYVGNGTLREHLDGTLGNGLEAGERLDIAIDVAHAITYLHMYTDPPIIHRDIKSLNILITEKFRAKVADFGFARLSADPNATHISTQIKGTAGYLDPEYLKTYQLTEKSDVYSFGVLLVELMTGRRPIEPQKPANERLTTRWAMQMLKRGDAILVMDPKLRRNPASTMALEKILMLAKQCLAPLRQSRPSMQKC…
Prupe.6G067400.1.p	-1.00138	0.296237	0.0430803	0.374715	Down	XP_007207351.1	uncharacterized protein LOC18773999 [Prunus persica]	-	-	-	-	-	-	-	-	-	-	-	-	-	-	-	MIFITCSAFLVFYLRKILSAALLCFINWVFLGNCFFGECFCLEWLFELTQRKKGNKMESAKKQGSAASSLTADLFGVKEPPPKSSTGIFASIFPPPSQVVGRNSSSSELTEYWQKQSLGNHAWNTKQGCPAISSEGARYSLPNKDRSSVLQEERAEPCYLSSSLYYGGQEVYSQSPSTHASGSYPIFKKDGGEDDPNGSNSNSAARGNWWQGSLYY
Prupe.6G087500.1.p	10.2884	6.84695	3.50553e-05	0.000141037	Up	ONI00410.1	hypothetical protein PRUPE_6G087500 [Prunus persica]	32.62	5e-79	sp|O65924|Y2921_ARATH	Putative leucine-rich repeat receptor-like protein kinase At2g19210 OS=Arabidopsis thaliana GN=At2g19210 PE=3 SV=1	At3g19230	219	1e-63	KOG0619	FOG: Leucine rich repeat	R	General function prediction only	K16224|1|8e-80|274|brp:103829497|senescence-induced receptor-like serine/threonine-protein kinase!K04733|4|2e-76|263|rcu:8281590|interleukin-1 receptor-associated kinase 4 [EC:2.7.11.1]			GO:0016021//integral component of membrane	MCLFPYCSSVLGQLTMASSIVLLLLLIALALLSVSANLVSIDCGSSDSYTDENSIKWVGDDDFVQNGESQVVQTTNGVSNVMGTLRVFSTRKKNCYSIKAEKGSQFLVRASFYYGNYDKKSAPPSFDLQLDGNYWNTIQTSAEGVVYYEVIYITKGDSIELCLAQTQPNQLPFISAIEIRGLASDMYNHVDSEYAMLLTRRVAYGATEAIRYPSDDFDRIWDAVEVGNGLVKVTTDAQTIDTSVPDQPPVAAFQYGITTSKTSEAILLVTDLPPVEVPIYIIMYFSEVTELDSTQTRSFEIYIDGKSHFDPIVPAYGSVVEMSITNISASSNTSFSLVATSDSTLPPLINAMEVYYVSGPITDGTDSKDVAGLATLQDKFSTLQEWTGDPCLPSPFTWD…
Prupe.6G107300.1.p	10.5657	8.30244	0.000230108	0.000765551	Up	XP_007206157.1	SNF1-related protein kinase regulatory subunit beta-3 [Prunus persica]	63.25	5e-48	sp|Q9ZUU8|KINB3_ARATH	SNF1-related protein kinase regulatory subunit beta-3 OS=Arabidopsis thaliana GN=KINB3 PE=1 SV=1	At2g28060	149	1e-47	KOG1616	Protein involved in Snf1 protein kinase complex assembly	G	Carbohydrate transport and metabolism	K07199|1|1e-66|200|pop:7463306|5'-AMP-activated protein kinase, regulatory beta subunit	GO:0009744//response to sucrose;GO:0043562//cellular response to nitrogen levels	GO:0019887//protein kinase regulator activity	-	MNNSFGDDYDEATVAGFEVLRSPDASYDNVYPGNEDEARDPPLVPPHLQQTLLSYPASADTAGTLPLPQNVTLNHLYIENRESPRSVVALGFTHRFRSKFVTVVLYKPVQRRGTTST
Prupe.6G113800.1.p	10.532	8.10827	9.2246e-05	0.000343195	Up	XP_007207527.1	cyclin-dependent kinases regulatory subunit 1 [Prunus persica]	87.5	6e-50	sp|Q9SJJ5|CKS2_ARATH	Cyclin-dependent kinases regulatory subunit 2 OS=Arabidopsis thaliana GN=CKS2 PE=1 SV=1	At2g27970	152	1e-49	KOG3484	Cyclin-dependent protein kinase CDC28, regulatory subunit CKS1, and related proteins	D	Cell cycle control, cell division, chromosome partitioning	K02219|1|3e-59|179|pavi:110755337|cyclin-dependent kinase regulatory subunit CKS1	GO:0051301//cell division;GO:0007049//cell cycle	GO:0016538//cyclin-dependent protein serine/threonine kinase regulator activity	-	MGQIQYSEKYFDDIYEYRHVVLPQEVAKLLPKNRLLSENEWRAIGVQQSRGWVHYAIHRPEPHIMLFRRPLNYQQQQENQAQQVLAK
Prupe.6G125800.1.p	1.15644	0.399273	0.027465	0.331548	Up	XP_007206136.1	54S ribosomal protein L37, mitochondrial [Prunus persica]	-	-	-	-	At5g14290	161	3e-52	KOG3435	Mitochondrial/chloroplast ribosomal protein L54/L37	J	Translation, ribosomal structure and biogenesis	K17435|1|8e-93|268|pper:18774691|large subunit ribosomal protein L54			GO:0005840//ribosome	MAMSHVKTFRSIINTSEAVGIVSRRTFAIGGGKAKKGSKGAAQGDAPKASNLDKEVKSTTVVGANILKDGTDPKILPDAEYPDWLWRLLDKRPALSELSRKNIETLPYKDLKRFVKLDNRARIKDNNSLKAKN
Prupe.6G132600.1.p	10.3578	7.18466	0.00607709	0.0142012	Up	ONI01323.1	hypothetical protein PRUPE_6G132600 [Prunus persica]	-	-	-	-	-	-	-	-	-	-	-	K13680|1|2e-21|95.1|obr:102721899|beta-mannan synthase [EC:2.4.1.32]	GO:0009269//response to desiccation	-	-	MGIKLDWSWSSAIIGAASALATTALISSKPKDPTFDVVSIKLTSFKLNFPLLDAELILTVQVTNPNVVPIQYSSTTMSIFYKGALLGSADVEAGSQPAKSSQLLQLPARLDGLQLAHHAASFIADAARREMVLDAAVDIAGTARVLWWDHKFKVHVDSHITVDPVFLEVIDQENKSKMDISLTGV
Prupe.6G138400.1.p	-10.2622	6.72996	2.58836e-05	0.000118828	Down	ONI01427.1	hypothetical protein PRUPE_6G138400, partial [Prunus persica]	59.77	1e-108	sp|Q94KL7|SILD_FORIN	Secoisolariciresinol dehydrogenase (Fragment) OS=Forsythia intermedia PE=1 SV=1	At3g51680	263	1e-87	KOG0725	Reductases with broad range of substrate specificities	R	General function prediction only	K09841|1|3e-95|285|nto:104121195|xanthoxin dehydrogenase [EC:1.1.1.288]		GO:0016491//oxidoreductase activity	-	MAIGNFSLLAAAARRLEGKVALITGGASGIGESTARLFSKHGAKVVIADVQDDLAESVCRDLSPSPTLFVHCDVTKEEDVENAVQTTTNKYGELDIMFNNAGIIGTNKPNILDNDKVEFEQVIRVNLVGAFLGIKHAARVMIPAGKGSIINTASVCSTIGGCASHAYTSSKHGLVGLVRNTAVELGQHGIRVNCVSPYAVATKLAKEFFKIDDDGVHGAYSNLKGRVLKAEDIAEAALYLGSDESKYVSGHNLLVDGGYTIMNA
Prupe.6G147900.1.p	-1.38334	0.198654	0.00011682	0.123323	Down	XP_007205038.2	putative CCA tRNA nucleotidyltransferase 2 [Prunus persica]	-	-	-	-	At1g22660	641	0	KOG2159	tRNA nucleotidyltransferase/poly(A) polymerase	J	Translation, ribosomal structure and biogenesis	K00974|1|0.0|785|lang:109346723|tRNA nucleotidyltransferase (CCA-adding enzyme) [EC:2.7.7.72 3.1.3.- 3.1.4.-]	GO:0006396//RNA processing	GO:0016779//nucleotidyltransferase activity;GO:0003723//RNA binding	-	MRVALQTALLSCEPIFVPKLRRSCYPHPNLTISWFPTKTLVFSPCRAIMAVPSRPTVQVRDKIELNETEKKIFDRLLGTVRHFGLQNQLRVAGGWVRDKLLGKDCYDIDIALDNMLGSEFVEKVRDYLLHVGEEAQGIAVIPCNPEQSKHLETARMRICDTWIDFVNLRCEEYCENSRIPTVQKYGTAEEDAYRRDLTINSLFYNINTSSIEDYTKRGIADLKSGKIVTPLPPKSTFMDDPLRVLRAIRFGARFGFILDEELKEAASCDEVKAALSAKISRERIGTEIDLMISGNQPVQAMAYICDLKLFWVVFSLHPKYEPAVSEGCDRLCLAYLDATWNLIQLIGNSTFNDEQRRLALYTAMFLPLRKTVYKDNKAKKIPVVNYIFRDSLKRKVSDA…
Prupe.6G171900.1.p	-1.10893	0.347007	0.0241108	0.319824	Down	ONI01998.1	hypothetical protein PRUPE_6G171900 [Prunus persica]	70.22	2e-154	sp|Q0WRJ2|TC10A_ARATH	3-dehydrosphinganine reductase TSC10A OS=Arabidopsis thaliana GN=TSC10A PE=1 SV=1	At3g06060	441	7e-154	KOG1210	Predicted 3-ketosphinganine reductase	Q	Secondary metabolites biosynthesis, transport and catabolism	K04708|1|0.0|659|pper:18774118|3-dehydrosphinganine reductase [EC:1.1.1.102]	-	-	-	MAYFNLSFLALLLLLLPPLALLLILYLIVRPRSVKIPIKNRHVFITGGSSGIGLALAHHAASEGARVSILARSVDKLEEAKNNIQLSTGIDVSIFSADVRDYDAVSKAVEEADPIDVLIVNQGVFVPEELEKQGLDEVKFMVDVNLIGSFNMIKAALPKMKKGDSVPRSIALMSSQAGQVGIYGYTAYSASKFGLRGLAEALQQEVISHDIHVSLIFPPDTDTPGLTEETKKRPQLTSIIAESSGAMKAEAVAKKAFDGIKSAAFIVPCNLEGALLSIATAGMSPQRSFVMAFVEVVAAGLVRLVALFFQWNWYNGIHMWHAQNEKLNYFRSNFDSTALSFYSLYFGYIWVAGQQLLAAALHHLVHCKGTSYTAAVGCGILWFFESLTFTEGGFGYRIR…
Prupe.6G191200.1.p	10.5998	8.52295	0.00150791	0.00414077	Up	XP_007208468.1	phospho-2-dehydro-3-deoxyheptonate aldolase 2, chloroplastic [Prunus persica]	76.34	0	sp|P37216|AROG_SOLLC	Phospho-2-dehydro-3-deoxyheptonate aldolase 2, chloroplastic OS=Solanum lycopersicum PE=2 SV=1	-	-	-	-	-	-	-	K01626|1|0.0|1112|pper:18774550|3-deoxy-7-phosphoheptulonate synthase [EC:2.5.1.54]	GO:0009423//chorismate biosynthetic process;GO:0009073//aromatic amino acid family biosynthetic process	GO:0003849//3-deoxy-7-phosphoheptulonate synthase activity	GO:0009507//chloroplast	MALTNPATLSSKSLCNTHSLSPPTPQSHQPIFSPFLTKRKTLHPICAAAAADSGKAPVVAEKPPKASTEVKPVSGKWSLESWKTKKALQLPEYPDQNALETVLQTIESFPPIVFAGEARHLEEKLAEAALGNAFLLQGGDCAESFKEFSANNIRDTFRVMLQMGVVLMFGGQMPVIKVGRMAGQFAKPRSEAYEVKDGVKLPSYKGDNINGDAFDEKSRNPDPQRLIRAYCQSAATLNLLRSFATGGYAAMQRVTQWNLDFAQNSEQGDRYQELASRVDEALGFMTAAGLTIEHPIMTTTDFWTSHECLHLPYEQSLTRKDSTSGLYYDCSAHMLWVGERTRQLDGAHVEFLRGLANPLGIKVSNKMDPKELVNIIEILNPSNKPGRITIIARMGAENM…
Prupe.6G219600.1.p	1.00895	0.219874	0.00251743	0.234959	Up	ONI02744.1	hypothetical protein PRUPE_6G219600 [Prunus persica]	73.55	0	sp|Q84JF4|NAGS1_ARATH	Probable amino-acid acetyltransferase NAGS1, chloroplastic OS=Arabidopsis thaliana GN=NAGS1 PE=2 SV=1	At2g22910	773	0	KOG2436	Acetylglutamate kinase/acetylglutamate synthase	E	Amino acid transport and metabolism	K14682|1|0.0|1103|pavi:110746285|amino-acid N-acetyltransferase [EC:2.3.1.1]	-	-	-	MAALRSRPSNYHQTLCSCHCKPRIFNYNLKVKNQRVGFIGLACLWQGMGKRKRRLMEAQGFGWEGHDLGAYVISEEDIRFVEALREVQPYVFLNRGRTFVVAIAGEIVDIPIYFDALLQDIAFLHHLGIRFVLVPGTHVQIDELLAERGKKPKFVGPYRVTDSDSLTAAKEAAGAISVMIEAKLSPGPSICNIRRHGDSSRLHEVGVSVESGNFLAAKRRGVVAGVDYGATGEVKKVDVSRMRKRLNDDCIVILSNLGYSSSGEVLNCNTYEVATACALAIEADKLICIIDGPILDESGRLIRFLTLEEADMLIRRRAKQSEIAASYVKAVDEENLSGLGHDDPNATQQNGNALKGRYTTMFHNGVGFDNGSGLWSGEQGFAIGGHERQSRLNGYLSEL…
Prupe.6G230500.1.p	10.5032	7.94752	0.00690301	0.0156107	Up	XP_007207380.1	probable beta-1,4-xylosyltransferase IRX14H [Prunus persica]	64.29	0	sp|Q9FH90|IX14H_ARATH	Probable beta-1,4-xylosyltransferase IRX14H OS=Arabidopsis thaliana GN=IRX14H PE=2 SV=1	At5g67230	650	0	KOG1476	Beta-1,3-glucuronyltransferase B3GAT1/SQV-8	O	Posttranslational modification, protein turnover, chaperones	K20871|1|0.0|1053|pper:18772379|putative beta-1,4-xylosyltransferase IRX14 [EC:2.4.2.-]	GO:0071555//cell wall organization	GO:0015018//galactosylgalactosylxylosylprotein 3-beta-glucuronosyltransferase activity	GO:0016021//integral component of membrane;GO:0000139//Golgi membrane	MKLSTLQQSYLNRRSNSFRGSGPLDSSSDGVIKSPATVFWLVLHGLCCLISLVLGFRFSRLVFFFLFSTSSSNLYPVPFRSASELAGTLDLPANPITNLEFTLNRNTTTASSSSRVVVGRHGIRIRPWPHPNPTETMKAHRIIETVQREQRRQFGVNNPKTVIAVTPTYARTFQALHLTGVMHSLMLVPYDVVWIVVEAGGVTNETTSIVSKSGLRIIHVGFDQRMPNTWEGRHLLEARMRLHALRIVREQKLDGIVMFADDSNMHSMELFDEMQNVKWFGAVSVGIVAHSENAYDLSDSTIHKKEDGENPSMPVQGPACNSSNKLVGWHTFNSLPYVGKSANYIDDRAPVLPRKLEWAGFVLNSRLLWNRAEDKPEWVKDLDSIGGADEDIGSPLFLL…
Prupe.6G235000.1.p	10.2519	6.67531	0.00220044	0.00590195	Up	XP_007205159.1	uncharacterized protein LOC18773635 [Prunus persica]	-	-	-	-	-	-	-	-	-	-	-	K14768|1|3e-80|265|mdm:103410443|U3 small nucleolar RNA-associated protein 7!K20884|2|2e-20|96.7|mdm:103422115|riboflavin kinase / FMN hydrolase [EC:2.7.1.26 3.1.3.102]			GO:0016021//integral component of membrane	MSDQHPRLNHLRSTAQVLRQATTSFAGNLFTFFFLSLLIFSFRTVVENGTYLLTSFIDRDPSLKSLLSRLDLAGAASPNHRSSRSPADSPSPVTLRRRHRPFLHLTRVGTLDDDFFSGDDGDTRSQFGPNRIAPILIFSSASHSTSKLGFNGTYGTRVSEIVRSGLTFKADKFTISDDRAGEGDREGNSSEGEEKGGDEELDDRVVDLQFFIKGLELGRRDVATLFFLVSFLSAAYGWVILGFLITYSWVLGVVFTTVVNDLIGRITSFVGLVWDGSRLGVKRLSGFILMRWAVRDALTQLLGLWYFGEIEDQYSFFKLFIRLKLMPFSVMPPWIRGYEKEISGFLLMWFVLDTLVAFVFAVDAWVAIVDSRKNGREIVKEGCYLMLSMLRQAIQIKCL…
Prupe.6G235400.1.p	2.41933	0.461053	0.00333335	0.234959	Up	XP_007208432.1	phenylalanine ammonia-lyase 1 [Prunus persica]	98.61	0	sp|O64963|PAL1_PRUAV	Phenylalanine ammonia-lyase 1 OS=Prunus avium GN=PAL1 PE=2 SV=1	At2g37040	1258	0	KOG0222	Phenylalanine and histidine ammonia-lyase	Q	Secondary metabolites biosynthesis, transport and catabolism	K10775|1|0.0|1484|pper:18772065|phenylalanine ammonia-lyase [EC:4.3.1.24]	GO:0009800//cinnamic acid biosynthetic process;GO:0006559//L-phenylalanine catabolic process	GO:0045548//phenylalanine ammonia-lyase activity	GO:0005737//cytoplasm	MATNSIKQNGHQNRSLESSELCIKKDPLNWGVAAETLKGSHLDEVKRMVAEYRKPVVKLGGESLTISQVAAIATHDSGVKVELSESARAGVKASSDWVMDSMSKGTDSYGVTTGFGATSHRRTKQGAALQKELIRFLNAGVFGSTKESGHTLPHQATRAAMLVRINTLLQGYSGIRFEILEVITKFLNNNVTPCLPLRGTITASGDLVPLSYIAGMLTGRPNSKAVGPDGQTLSAAEAFEFVGINSGFFELQPKEGLALVNGTAVGSGLASTVLFDTNILALLSEILSAIFAEVMQGKPEFTDHLTHKLKHHPGQIEAAAIMEHILDGSSYVKAAKKLHEQDPLQKPKQDRYALRTSPQWLGPQIEVIRYSTKSIEREINSVNDNPLIDVSRNKALHGG…
Prupe.6G262400.1.p	-1.24049	0.412598	0.0238063	0.318793	Down	XP_007207478.1	uracil phosphoribosyltransferase [Prunus persica]	85.27	9e-145	sp|P93394|UPP_TOBAC	Uracil phosphoribosyltransferase OS=Nicotiana tabacum GN=UPP PE=2 SV=1	At3g53900	395	3e-139	KOG4203	Armadillo/beta-Catenin/plakoglobin	TZ	Signal transduction mechanisms;Cytoskeleton	K00761|1|0.0|590|pper:18774942|uracil phosphoribosyltransferase [EC:2.4.2.9]	GO:0006223//uracil salvage;GO:0009116//nucleoside metabolic process	GO:0004845//uracil phosphoribosyltransferase activity	-	MATCRIKFTLRCPSSDTQRFASTCRLPNPSYPLLLNLNPASSSNPKKVSCSSARRRSFGTVRAHMATEEKPVSEDRMLVFVPPHPLIKHWVSVLRNEQTPCPIFRNAMAELGRLLIYEASRDWLPTVTGEIQSPLGVASVEFVDPREPISVVPILRAGLALVEHASSILPATRTYHLGIGRNEETLQPTVYLNKLPDKFPEGSRVFLVDPMLATGGTIVAAMNLLKDHGVDNKQIKVISAVAAPPALQKLSEKFPGLHVYTGIIDPIVNEKGFIIPGLGDAGDRSFGT
Prupe.6G266600.1.p	10.4336	7.57274	0.00527315	0.0126032	Up	XP_020423032.1	7-deoxyloganetic acid glucosyltransferase [Prunus persica]	46.61	5e-146	sp|U3U992|UGT8_CATRO	7-deoxyloganetic acid glucosyltransferase OS=Catharanthus roseus GN=UGT709C2 PE=1 SV=1	At1g22340	302	4e-97	KOG1192	UDP-glucuronosyl and UDP-glucosyl transferase	GC	Carbohydrate transport and metabolism;Energy production and conversion	K22706|1|7e-97|304|pper:18788923|(R)-mandelonitrile beta-glucosyltransferase [EC:2.4.1.354]!K13030|3|4e-78|255|bdi:100843904|cyanohydrin beta-glucosyltransferase [EC:2.4.1.85]!K00699|5|4e-74|244|spen:107013955|glucuronosyltransferase [EC:2.4.1.17]	GO:0008152//metabolic process	GO:0016758//transferase activity, transferring hexosyl groups	-	MAGKQSLVVIFPFPLQGHIKPLLCLAELLCHAGFHVTFVNTHHNHKRLANPEALSTHFPTLHFESISDGLPDDHPRALNGELLIALKTSIRPHFRELLETISIKAESNDAPAPPLNCIITDGLVTFAFDLAEELEIPVLSYNVPCARYLWTCLCLPDLIEQGQLPFPDDDMSVEITGVSGMDGPLHRQDLPSFCRVKQANHPALQFAINWTQAQRRASALILDTVYELDASCLSHMALMFPKIYTLGPLHALLNAQIGNVSKSLASHGGLWKSDPNCMTWLDSQPSRSVIYVSFGTLVNLTRAQMIEFWYGLVNSGHPFMWVIRSDIIYGAHQIPAELEIGTKERGYIVDWVSQEEVLAHKAVGGFLTHSGWNSTLESIVAGLPMICWPNLGDHYIISR…
Prupe.6G270100.1.p	10.6234	8.63787	2.46071e-05	0.000118828	Up	XP_007206361.2	OTU domain-containing protein At3g57810 isoform X1 [Prunus persica]	35.22	7e-22	sp|Q8LBZ4|OTU_ARATH	OTU domain-containing protein At3g57810 OS=Arabidopsis thaliana GN=At3g57810 PE=2 SV=1	At3g57810	68.9	2e-13	KOG2606	OTU (ovarian tumor)-like cysteine protease	TO	Signal transduction mechanisms;Posttranslational modification, protein turnover, chaperones	K18342|1|8e-47|156|apro:F751_3607|OTU domain-containing protein 6 [EC:3.4.19.12]	-	-	-	MADKRSNEIVLEQLKNGIAQFELVSSPVLSISSSNSQVNPTALFGDYSHRFFARIGPSLSRGSSATKKVERYSVQKVTGDGRCLFRALVKGMAFNKGFSLSPREEKNDADELRMAVKEIICEDEEERPKYEAALVAITVDESLNRYCQRITRPDFWGGESELLVLSKLCGQPITVYIPEHEHTNGGRSSGFIPIAEYGTEFGKGSRNRKPRKVVRLLYSGSNHYDLLV
Prupe.6G276200.1.p	-2.71	0.799809	0.019497	0.29494	Down	XP_020421586.1	chlorophyll a-b binding protein CP29.1, chloroplastic [Prunus persica]	82.91	1e-170	sp|Q9XF88|CB4B_ARATH	Chlorophyll a-b binding protein CP29.2, chloroplastic OS=Arabidopsis thaliana GN=LHCB4.2 PE=1 SV=1	-	-	-	-	-	-	-	K08915|1|0.0|586|pper:109949776|light-harvesting complex II chlorophyll a/b binding protein 4	GO:0018298//protein-chromophore linkage;GO:0009765//photosynthesis, light harvesting	GO:0016168//chlorophyll binding	GO:0009535//chloroplast thylakoid membrane;GO:0009522//photosystem I;GO:0009523//photosystem II;GO:0016021//integral component of membrane	MATTAGAAATSSFIGTRFPDVYSNSGRVQARFGFGTKKPKKASKSTFSTDRPLWYPGAKAPEWLDGSLVGDYGFDPFGLGKPAEYLQYDYDGLDQNLAKNLAGDVIGTRTETADVQSTPFQPYNEVFGLQRFRECELIHGRWAMLATLGALTVESVTGITWQDAGKVELIEGSSYLGQPLPFSITTLIWIEVLVIGYIEFQRNAELDPEKRLYPGGKFFDPLGLASDPEKKATLQLAEIKHARLAMIGFLGFAVQAAVTGKGPLNNWATHLSDPLHTTIIDAFTSS
Prupe.6G308800.1.p	1.2268	0.412942	0.0178472	0.29077	Up	XP_007205564.1	ABC transporter I family member 20 [Prunus persica]	85.44	0	sp|Q9LZ98|AB20I_ARATH	ABC transporter I family member 20 OS=Arabidopsis thaliana GN=ABCI20 PE=2 SV=1	At5g02270	524	0	KOG2355	Predicted ABC-type transport, ATPase component/CCR4 associated factor	RK	General function prediction only;Transcription	K12608|1|0.0|660|pper:18775362|CCR4-NOT complex subunit CAF16	GO:0080167//response to karrikin	GO:0016887//ATPase activity;GO:0005524//ATP binding	-	MGVQVNSGPTIEINGLKFTYPGINGHPPPGSKPLIEDFNLTLNAGDRCLLVGSNGAGKTTILKILGGKHMVEPHMVRVLGRSAFHDTALTGSGDLSYLGGEWRRDVAFAGFDVPIQMDVSADKLINGVSGVDPQRRAELIKVLDIDLSWRLHKVSDGQRRRVQICMGLLKPYKVLLLDEITVDLDVLARADLLKFLRKECEERGATIIYATHIFDGLEDWPSHIAYVANGKLQLALPMDRVKEMYKLSLMRTVESWLRKERDEERKRRNERKAKGLPEFEQQNEGSSGDVRAVNNGWAAGRLNSTIAGEENFVFSSNRVLRQ
Prupe.6G316600.1.p	10.5175	8.02946	0.0153048	0.0307875	Up	XP_020420650.1	kinesin-like protein KIN-14I [Prunus persica]	59.9	0	sp|F4IL57|KN14I_ARATH	Kinesin-like protein KIN-14I OS=Arabidopsis thaliana GN=KIN14I PE=2 SV=1	At5g27000	1137	0	KOG0239	Kinesin (KAR3 subfamily)	Z	Cytoskeleton	K10406|1|0.0|2124|pper:18775590|kinesin family member C2/C3	-	-	-	MATEQVLPFSIVSVVEDVLQQHGSRLSDIDLASRKAEEASLRRYEAARWLRKTVGVVGGKDLPAEPSEEDFRLGLRSGIILCNVLNKVQPGAVPKVVEGPSDSVLIPDGAALSAYQYFENVRNFLVAVEEMGLPTFEASDLEQGGKSARIVNCVLALKSYNDWKQGGGIGSWKFGTNFKSPTSGKYFFRKNSEPFANSVTRTSSLGEKSLDSLSSEDINEASSSHALHMLVREVLFDRRQEEIPLIVESMLSKVMEEFEHRLASQNSLIKTASRDMTLSGPERSLSECSADMKVDDHEEKVAADIKEEEISDHEEGSKTESFKQKMLVDQQQKDIQELKHTLYDTKAGMRFLQMKYQEEFNSLGKHLHGLAHAATGYQKVLEENRKLYNQVQDLKGNIR…
Prupe.6G339600.1.p	10.2471	6.67762	0.0018254	0.00493429	Up	XP_020422127.1	uncharacterized protein LOC18774946 [Prunus persica]	-	-	-	-	-	-	-	-	-	-	-	-		GO:0005509//calcium ion binding	-	MSTSAVVLHALNNLTVTRFVEDATSFEKCSKECFGALDADGKGGLSREKLRAGFGKLLPGIGYVSQPKDEINVLHDAIFKRFDADQNGVIDCHEFKSLLMETMLAVARGIGGSPVLVALEHGSLLRKAAEHEQARTSN
Prupe.6G343900.1.p	-10.4779	7.8163	2.22859e-05	0.000118828	Down	ONI04856.1	hypothetical protein PRUPE_6G343900 [Prunus persica]	67.13	3e-72	sp|P32045|PRP2_SOLLC	Pathogenesis-related protein P2 OS=Solanum lycopersicum PE=2 SV=1	At3g04720	200	2e-65	KOG4742	Predicted chitinase	R	General function prediction only	-	GO:0050832//defense response to fungus;GO:0042742//defense response to bacterium	-	-	MNEQFRLHNTLYPTIKKDIIILERERERVLMKMAKLMFLLLVCVMSLNAASAQSASNVRATYHIYNPEKINWDLKAASAYCSTWDANKPLEWRRKFGWTAFCGPVGPRGQASCGKCLTVTNVRTGTQAKVRIVDQCSNGGLDLDQGVFKRLDTDGQGYAQGHLRVNYQFVNCGD
Prupe.7G007200.1.p	-10.4166	7.49068	0.0010012	0.0028868	Down	XP_020423399.1	uncharacterized protein LOC18771678 isoform X1 [Prunus persica]	26.92	7e-39	sp|A5JTQ3|XYL2_MEDSV	Beta-xylosidase/alpha-L-arabinofuranosidase 2 OS=Medicago sativa subsp. varia GN=Xyl2 PE=2 SV=1	-	-	-	-	-	-	-	K05349|1|0.0|1301|pper:18771678|beta-glucosidase [EC:3.2.1.21]	-	-	-	MARIPIFLMGLLFLCFNIAIAEAQYINYKDPKQPLNSRIKDLVSRMTLEEKIGQMVQIDRSVASAEVMKKYFIGSILSGGGSVPAQKASAETWINMVNDFQKGSLSTRLGIPLIYGIDAVHGHNNVYKATIFPHNIGLGATRDPELVKRIGAATALEARATGIPYVFAPCIAVCRDPRWGRCYESYSEDPKIVQAMTEIIPGLQGEIPANSRKGVPFVAGNKKVAACAKHFVGDGGTTKGINENNTVINRHGLLSIHMPGYYNSIIKGVATIMVSYSSWNGVKMHANHDLVTAFLKNTLRFRGFVISDWEGIDRITSPPHANYSYSIQAGINAGIDMVMVPYNYMEFIDGLTFLVKNKIIPMSRIDDAVKRILRVKFVMGLFEEPFADMSLVHQLGSQE…
Prupe.7G008300.1.p	-10.3472	7.14236	0.000266731	0.000870649	Down	XP_007204805.1	inactive protein RESTRICTED TEV MOVEMENT 2 [Prunus persica]	30.19	4e-12	sp|Q84J50|HS177_ORYSJ	17.7 kDa class I heat shock protein OS=Oryza sativa subsp. japonica GN=HSP17.7 PE=2 SV=1	At1g54400	65.1	2e-13	KOG0710	Molecular chaperone (small heat-shock protein Hsp26/Hsp42)	O	Posttranslational modification, protein turnover, chaperones	K13993|1|6e-12|64.7|vvi:100256188|HSP20 family protein	-	-	-	METKLAANDEQCYEVFEPFCQWKKEEGLDILKVHLPGFKRQDVRVQINNKGILTISGKQSMEEETASPPSRFLKEIKISTNCNTSGIRAKFSNGILSISMPKKVTNLSTQLSGSGDKIKAAEIATWSSINYYLLGLRSKVLSKEMVLKMAGVALGMALGGYAVYRYPKSACVQN
Prupe.7G012000.1.p	10.4312	7.56198	0.00017404	0.000602178	Up	XP_007204457.1	TMV resistance protein N [Prunus persica]	44.96	2e-94	sp|Q40392|TMVRN_NICGU	TMV resistance protein N OS=Nicotiana glutinosa GN=N PE=1 SV=1	At1g47370	80.5	3e-16	KOG0619	FOG: Leucine rich repeat	R	General function prediction only	K22038|1|3e-110|351|aip:107645897|volume-regulated anion channel!K08852|4|1e-95|310|mdm:103426788|serine/threonine-protein kinase/endoribonuclease IRE1 [EC:2.7.11.1 3.1.26.-]!K04733|5|1e-85|280|ccav:112524424|interleukin-1 receptor-associated kinase 4 [EC:2.7.11.1]	GO:0007165//signal transduction	GO:0043531//ADP binding	-	MGEAQTGWMFDVFVSFRTEDTGKNFTDHLYNALDQKGIVTFRHDALERGKPISTEILKTIRESRFSIVVFSRSYACSNRCLDELVGILECMKSKGQTVFPVFYDVDPSDVRKQKGCFEKALCEHVQFMDKVESWRAALKEAANLSGWDLKNKFESKVIQEIAERIFNQLSQEVSSALKDLVGIDSLVKEMNMYLDTGEDDVRITGICGEKGIGKTTIAQAVFDSLSVRFDGSSFLANIKEVSEKQGLVPLQEQLISEILMARNMKIRNVHRGVNTIRNSLCRKKILLVLDGVDRLEQLENLAGNRNWFGAGSRIIITTRDENLLIRYGVDRKYRAAELNHDDALRLFCWKAFKQGRPPEDYAGLCNLVLDHAKGVPSALEALGSFLFGRSLPEWQGAVD…
Prupe.7G019000.1.p	1.35584	0.0183123	0.00859783	0.265737	Up	XP_007202594.1	Werner Syndrome-like exonuclease [Prunus persica]	35.06	9e-25	sp|Q84LH3|WEX_ARATH	Werner Syndrome-like exonuclease OS=Arabidopsis thaliana GN=WEX PE=1 SV=1	At4g13870	97.8	3e-24	KOG4373	Predicted 3'-5' exonuclease	R	General function prediction only	K20777|1|3e-83|249|jcu:105640204|exonuclease 3'-5' domain-containing protein 2 [EC:3.1.11.1]		GO:0008408//3'-5' exonuclease activity;GO:0003676//nucleic acid binding	-	MAVSIVDYELPHDTHNVYDVSFHGDRIHTLVTHSSSVVDSWLAQTNLQSRIVGLDVEWRPNFNRSIENPVATLQLCVGPDCLIYQLLHTDHIPQALHAFLANRSYTFVGVGIGSDVEKLLLDYGLHVANAVDLAVFAAGRFDSTELRNAGLKGLARRMLGKEVQKPNRITMSRWDNQWLTCDQVQYACVDAFLSFEIARHLNV
Prupe.7G020600.1.p	1.58021	0.377435	0.00305149	0.234959	Up	XP_007202509.1	probable aquaporin SIP2-1 [Prunus persica]	63.71	5e-112	sp|Q9M1K3|SIP21_ARATH	Probable aquaporin SIP2-1 OS=Arabidopsis thaliana GN=SIP2-1 PE=2 SV=1	At3g56950	321	1e-111	KOG0223	Aquaporin (major intrinsic protein family)	G	Carbohydrate transport and metabolism	K09875|1|3e-172|477|pper:18771900|aquaporin SIP		GO:0005215//transporter activity	GO:0016021//integral component of membrane	MGRIGLLVSDFTMSFMWVWSGVLIKMYVYNNLGFGHEPTGEIIKSTLSIVNMFFFALLGKITNGGTYNPLTVFAAAITGDFTRFLFTVAARIPAQVIGSIAGVKLIIQLFPEVGLGPRLNVDIHRGALTEGLLTFAIVTISLGLARNIPGSFFMKTWISSVSKLTLHILGSDLTGGCMNPASVMGWAYARGTHVTKEHILVYWLAPIEATLLAIWTFRVLVPQLKEEKVDKKAKSE
Prupe.7G027600.1.p	10.4706	7.77151	0.000152509	0.000544	Up	XP_007202455.1	uncharacterized protein LOC18770707 [Prunus persica]	37.35	3e-09	sp|P49558|RK22_ODOSI	50S ribosomal protein L22, chloroplastic OS=Odontella sinensis GN=rpl22 PE=3 SV=1	At1g52370	155	2e-46	KOG1711	Mitochondrial/chloroplast ribosomal protein L22	J	Translation, ribosomal structure and biogenesis	K02890|1|0.0|549|pper:18770707|large subunit ribosomal protein L22	GO:0006412//translation	GO:0003735//structural constituent of ribosome	GO:0015934//large ribosomal subunit	MVGWQRNLQSLISHIGKRVSAANFSSSSSHFQRLWRPSPQTIARPLYHCFQHLGISSSRNLLADSSVESPLQSTVAPVSASDGERNEEHNQKPLSKPSQVQFVLKGIKMSSNKVNLVAKLIRGMRVEDALLQLQVTDKQAVKTVYQALHSARAEATYNHGLDPERLLVAGAFVGKGFLGFHKNRLYYHGKSNNGTKVRPNNYQLMVTLREITPEEEGEIARQRANNFLYLTKRLRLTKKENKFVPRQLIRNHKGKVSSSQRSGMTS
Prupe.7G053500.1.p	10.3786	7.28872	2.38992e-05	0.000118828	Up	XP_007202031.1	glycerol-3-phosphate dehydrogenase [NAD(+)] GPDHC1, cytosolic [Prunus persica]	87.07	0	sp|O22216|GPDHC_ARATH	Glycerol-3-phosphate dehydrogenase [NAD(+)] GPDHC1, cytosolic OS=Arabidopsis thaliana GN=GPDHC1 PE=2 SV=1	At2g41540	814	0	KOG2711	Glycerol-3-phosphate dehydrogenase/dihydroxyacetone 3-phosphate reductase	C	Energy production and conversion	K00006|1|0.0|978|pper:18771706|glycerol-3-phosphate dehydrogenase (NAD+) [EC:1.1.1.8]	GO:0005975//carbohydrate metabolic process;GO:0046168//glycerol-3-phosphate catabolic process	GO:0004367//glycerol-3-phosphate dehydrogenase [NAD+] activity;GO:0051287//NAD binding	GO:0009331//glycerol-3-phosphate dehydrogenase complex	MVGSIETLNRNLYSNGSIQNCNSLEEKLDELRSRLGKGNGDPLRIVGVGAGAWGSVFAAVLQDSYGQFRDKVQIRIWRRPGRAVDKATAELLFEVINSREDVLRRLIRRCAYLKYVEARLGDRTLYADEILKDGFCLNMIDTPLCPLKVVTSLQEAVWDADIVVNGLPSTETQEVFEEISNYWKERITDPIIISLAKGIEAALEPLPHIITPTQMINRATGVPIENILYLGGPNIASEIYNKEYANARICGAEKWRKPLAKFLRQPHFIVWDNSDLVTHEVMGGLKNVYAIGAGMVAALTKESATSKSVYFAHCTSEMIFITHLLAEEPEKLAGPLLADTYVTLLKGRNAWYGQMLAKGELNRDMGENISGKGMIQGVSAVKAFYELLSQSSLNVLHPE…
Prupe.7G064000.1.p	1.03439	0.232969	0.00216792	0.231705	Up	XP_007204267.1	probable galactinol--sucrose galactosyltransferase 2 [Prunus persica]	76.93	0	sp|Q94A08|RFS2_ARATH	Probable galactinol--sucrose galactosyltransferase 2 OS=Arabidopsis thaliana GN=RFS2 PE=2 SV=2	-	-	-	-	-	-	-	K06617|1|0.0|1609|pper:18770520|raffinose synthase [EC:2.4.1.82]		GO:0003824//catalytic activity	-	MTVIPQISINDGNLVVQGKTILTGVPDNIVLTPGTGVGLVAGAFIGATAAQSQSLHTFPIGVLEGLRFMCCFRFKLWWMTQRMGTCGKDVPLETQFMLVESKGDGEGGDEDDSSSSTIYTVFLPLLEGLFRSVLQGNERNEVEVCLESGDSAVQTNQGQCLVYIHAGTNPFEVITQAVKAVEKHMKTFVHREKKKLPSFLDWFGWCTWDAFYTDVTAEGVEQGLKSLSNGGTPPRFLIVDDGWQQIENKDKDTDAVVQEGAQFASRLTGIKENEKFQKNGHHSEQVSGLKHVVDEAKQHQNVKFVYVWHALAGYWGGVKPAATGMEHYDTALAYPVSSPGVTGNQPDIVMDSLSVHGLGLVHPKKVFNFYNELHAYLASCGVDGVKVDVQNIIETLGSG…
Prupe.7G076900.1.p	-1.05466	0.198462	0.000716029	0.187839	Down	XP_021830671.1	DNA polymerase delta small subunit [Prunus avium]	82.19	0	sp|O48520|DPOD2_ARATH	DNA polymerase delta small subunit OS=Arabidopsis thaliana GN=POLD2 PE=2 SV=2	At2g42120	751	0	KOG2732	DNA polymerase delta, regulatory subunit 55	L	Replication, recombination and repair	K02328|1|0.0|912|pavi:110770759|DNA polymerase delta subunit 2	GO:0006974//cellular response to DNA damage stimulus;GO:0006271//DNA strand elongation involved in DNA replication	GO:0003887//DNA-directed DNA polymerase activity;GO:0003677//DNA binding	GO:0043625//delta DNA polymerase complex	MEAMEIDSEKNLQRKHSTYNLLDERFEIQKEMYRGQQYSQIYFARLHMMRTLLYSLVPNWKPHLPVCTVLGLEKDKECIVVGTLYKHMKLKPCILDEYSKTRSTTPLVKPHNFVHPDDHLVLEDESGRVKLAGMLSPSVYVTGSIVGLHGKETDAGDFLVLDVLEAGLPPQIELPLKSREDKYVVFVSGLRVGSSSSNPLQFQLLVDHITGHLGDEKEQGIAAQIVHVVIAGNSIEVPRGLLNGQNLASKDQSRLSEPIKELDILLTQIAAGLPLDIMPGLDDPANFALPQQPLNRCLFPGSSAYNTFRSCTNPHCFDLDDIRFLGTSGQNIDDLEKYSEAKDKLEFVERTLRWRHLAPTAPNTLGCYPFTDRDPFLIESCPHVYFIGNQDKYDSRLVK…
Prupe.7G077500.1.p	10.351	7.15047	2.43613e-05	0.000118828	Up	XP_007202966.1	nudix hydrolase 23, chloroplastic [Prunus persica]	65.89	1e-130	sp|P93740|NUD23_ARATH	Nudix hydrolase 23, chloroplastic OS=Arabidopsis thaliana GN=NUDT23 PE=1 SV=2	At2g42070	307	1e-104	KOG3084	NADH pyrophosphatase I of the Nudix family of hydrolases	L	Replication, recombination and repair	K18453|1|0.0|618|pper:18771727|ADP-ribose/FAD diphosphatase [EC:3.6.1.13 3.6.1.18]		GO:0016787//hydrolase activity	-	MLKTRQILGCSSGLVSHRWKPYSSTGSRQVSFISISTCSKPLLLSSSSSSSSTIIPTTTTLLLPGSSPRRTRFGAFSMSSAHSGPNPGGPSSSVAVHSAGNARKINFCQWCGGPTKHEIPDGEEKIRAICTVCDKIAYENPKMVVGCLIEHDNMVLLCKRKIQPSYGLWTLPAGYMEIGESATEGAIRETWEEACAEVEVLSSFAQLDIPLIGQTYVIFLARLKKPHFSPGPESSECRLFALDDIPFDSLAFSSMVVTLKLYAEDVRAGKLKFHYGIINKKPGTSPSDIHAYTLDYHLQS
Prupe.7G079100.1.p	-1.00696	0.346853	0.0197963	0.29573	Down	XP_007202211.1	peroxidase A2 [Prunus persica]	77.36	0	sp|Q42578|PER53_ARATH	Peroxidase 53 OS=Arabidopsis thaliana GN=PER53 PE=1 SV=1	-	-	-	-	-	-	-	K00430|1|0.0|671|pper:18769960|peroxidase [EC:1.11.1.7]	GO:0006979//response to oxidative stress;GO:0042744//hydrogen peroxide catabolic process	GO:0020037//heme binding;GO:0046872//metal ion binding;GO:0004601//peroxidase activity	GO:0005576//extracellular region	MSSSSSTTYSLPLAITFVLLMLYVSNAQLNTTFYSSTCPNVTTIVRSVVQQALQSDSRIGASLIRLHFHDCFVNGCDASILLDKGGSIQLSEKDAAPNTNSTRGFDVVDNIKTAVENSCPAVVSCADILALAAEASVSLSGGISWNVLLGRRDSLTANQAGANTSIPSPFEGLANITSKFSAVGLNTNDLVALSGAHTFGRAQCQRFSNRLYNFNGTGNPDPTLNSSYLTTLQQTCPQNGSGTALANLDPTTPDSFDNSYFSNLQNNQGLLQSDQELFSTTGAATVSIVNSFSSNQSAFFQSFAQSMINMGNISPLVGSNGEIRLDCKKVNGG
Prupe.7G085700.1.p	10.6806	8.987	1.93826e-05	0.000118828	Up	XP_020423809.1	rRNA biogenesis protein RRP5 isoform X1 [Prunus persica]	62.39	0	sp|F4J8K6|RRP5_ARATH	rRNA biogenesis protein RRP5 OS=Arabidopsis thaliana GN=RRP5 PE=2 SV=2	At3g11964	2053	0	KOG1070	rRNA processing protein Rrp5	A	RNA processing and modification	K14792|1|0.0|3977|pper:18769940|rRNA biogenesis protein RRP5	-	-	-	MAASSQKPQGKKKARDPPKFNKSSKKPFKPNKDRNDTARSEAVTLQLEDDVPDFPRGGGSALNRQERDEIRAEVDAEFEAEEREMKKRKKIGMQKKSLSSEDDFGSLFGDGITGKLPKYANKITMKNISAGMKVWGVVAEVNEKDLVISLPGGLRGLVRASEALDPILDNETKAVADNLLASIFHVGQLVSCIVLQLDEDKKEKGKRKIWLSLRLSLLHKGFTLDSVQEGMVLTAYVKSIEDHGYILHFGLSSFTGFLPKNSPADSKEIQVNTGQLLQGAVRSIDKVRKVVYLSSDLETVSKCVTKDLKGISIDLLVPGMLVNARVLSTLENGVMLSFLTYFTGTVDIFHLQNSYPTLNWKEDYNQHKKVNARILFIDPSTRAVGLTLNPHLVRNKAPP…
Prupe.7G106700.1.p	10.4271	7.53826	2.3108e-05	0.000118828	Up	XP_007202896.2	heat shock cognate 70 kDa protein [Prunus persica]	65.44	0	sp|P09189|HSP7C_PETHY	Heat shock cognate 70 kDa protein OS=Petunia hybrida GN=HSP70 PE=2 SV=1	At1g56410	693	0	KOG0101	Molecular chaperones HSP70/HSC70, HSP70 superfamily	O	Posttranslational modification, protein turnover, chaperones	K03283|1|0.0|1083|pper:18771172|heat shock 70kDa protein 1/2/6/8	-	-	-	MAAESPAIGIDLGTTYSCVAVWQKDHAEIIANDQGKRTTRSYVTFTESNRLVGDEAFNQILRNPANSIFDAKRLIGRKFSDASVQSDVKLWPFKVIEDPSGKPKIVVMHKGEEKKFAAEQISSLVLRKMKEIAETYLCSNVKNAVITVPSYFNDSQRQATMNAGALAGLNVLGIINEPTAAAIAYGIDKKVGWYKKKHVMIFDWGGGTLDVSLLIIGQHGVFEVMATAGDTHLGGEDLDNRMVSYCVQEFKRKHQLDISGNSRALRRAKTECEKAKKALSYSFETDIEIDCWYQGEDFYANFSRKKFEQMNMDIFNKCMEPVKKCLKDAKMDISNVDDVVLVGGSSRIPKVQELLKEVFKGKELCRNINPDEAVAYGAAVQAAVLTGNVTGKLQDFSLL…
Prupe.7G120200.1.p	10.4157	7.5285	0.0033182	0.00850443	Up	XP_007201998.2	cytochrome P450 76A1 [Prunus persica]	45.4	7e-158	sp|P37122|C76A2_SOLME	Cytochrome P450 76A2 OS=Solanum melongena GN=CYP76A2 PE=2 SV=1	At3g52970	655	0	KOG0156	Cytochrome P450 CYP2 subfamily	Q	Secondary metabolites biosynthesis, transport and catabolism	K22983|1|3e-176|512|mesc:110621630|cytochrome P450 family 76 subfamily A	-	-	-	MLIGCLDLSRNQRRNYILGLLPEKTCKNRNESSQIEIFPETKQNFRKNTHTKMEHNEVVGFSIGVVLIWVAWSIILLVTLLRRRRLEEVAGHLPPGPRWWPMVGNIFQLGLGPPHESFAMLARNHGPIMTLWLGSMSTVVISSSQVAREMFKNHDVVLAGRKIYEAMKGDYGNEGSLITAQYGPHWRMLRRLCTTEFFVTSRIDAMCRVRAKCIDGMVQFIEDAASEMSTKTDGIDLGRFIFLMAFNLIGNLMFSKDLLDPKSERGAMFFYHAGKVMELAGKPNMADFFPILRWLDPQGIRRNTQFHVEKAFEIAGEFIRERMESMENGGNDGIERTKDFLDVLLEYRGDGVDEPSRFSSSRTVNVIVFEMFTAGTDTTTSTLEWAMAELLNNPKTLKK…
Prupe.7G129600.1.p	1.34304	0.554339	0.0416693	0.372586	Up	XP_007204682.1	ABC transporter B family member 1 [Prunus persica]	89.83	0	sp|Q9ZR72|AB1B_ARATH	ABC transporter B family member 1 OS=Arabidopsis thaliana GN=ABCB1 PE=1 SV=1	At2g36910	2320	0	KOG0055	Multidrug/pheromone exporter, ABC superfamily	Q	Secondary metabolites biosynthesis, transport and catabolism	K05658|1|0.0|2825|pper:18770709|ATP-binding cassette, subfamily B (MDR/TAP), member 1 [EC:7.6.2.2]		GO:0042626//ATPase activity, coupled to transmembrane movement of substances;GO:0005524//ATP binding	GO:0016021//integral component of membrane	MSQDSQGIKTIEQWRWSEMQGLELVSDAEPSSDPFKTNPSKPTTPSTTTAAALDRDPRVEDQEAQEVVNKAERREAMESSEPKKDSSGGGDGGNSSGGEKPEAFPSVGFGELFRFADGLDYVLMAIGSVGAIVHGCSLPIFLRFFADLVNSFGANANDMDKMMQEVLKYALYFLVVGAAIWASSWAEISCWMWTGERQSTKMRIKYLEAALNQDIQYFDTEVRTSDVVFAINTDAVMVQDAISEKLGNFIHYMATFVSGFVVGFTAVWQLALVTLAVVPLIAVIGAIHTTTLGKLSGKSQEALSQAGHTVEQTVVQIRVVLSFVGESRALQTYSSALKVAQRLGYKSGFAKGMGLGATYFVVFCCYALLLWYGGYLVRHHFTNGGLAIATMFAVMIGGL…
Prupe.7G137400.1.p	10.5235	8.05925	2.1614e-05	0.000118828	Up	XP_007202106.1	peptidyl-prolyl cis-trans isomerase CYP40 [Prunus persica]	73.06	0	sp|Q9C566|CYP40_ARATH	Peptidyl-prolyl cis-trans isomerase CYP40 OS=Arabidopsis thaliana GN=CYP40 PE=2 SV=1	At2g15790	555	0	KOG0546	HSP90 co-chaperone CPR7/Cyclophilin	O	Posttranslational modification, protein turnover, chaperones	K05864|1|0.0|750|pper:18770548|peptidyl-prolyl isomerase D [EC:5.2.1.8]	GO:0006457//protein folding	GO:0003755//peptidyl-prolyl cis-trans isomerase activity	-	MVRPRCYLDITIGGELEGRIVVELYNDIVPRTAENFRALCTGEMGIGPNTNVPLHYKGGCFHRIIKGFMIQGGDISAGNGKGGESIYGLKFEDENFDVKHERKGMLSMANLGPDTNGSQFFITTTRTCHLDGKHVVFGRVIKGMGVVRSIEHVTTKDDHFPTQQVVIADCGQLPEGADDGLCNIFKDGDVYPDWPADLDAKPEAISWWVMAVDSIKALGNEQFKKQDFKMALRKYRKALRYLDVCWELEDIDEETSSSLRKTKSQIFTNSSACRLKLGDLDGALLDSDFALRDWEANVKALFRQGQAYMALNDIDSGVESFKKALELEPNDGGIKKELLVAKRKVADRSEQEKKSYSRMFH
Prupe.7G138500.1.p	10.405	7.42327	0.00130744	0.00361899	Up	XP_020423749.1	probable disease resistance protein At5g66900 [Prunus persica]	39.02	5e-158	sp|Q9FKZ1|DRL42_ARATH	Probable disease resistance protein At5g66900 OS=Arabidopsis thaliana GN=At5g66900 PE=3 SV=1	At4g26090	100	3e-21	KOG4658	Apoptotic ATPase	T	Signal transduction mechanisms	K19613|1|3e-102|324|cpap:110822548|leucine-rich repeat protein SHOC2!K13415|3|2e-36|153|mdm:103401427|protein brassinosteroid insensitive 1 [EC:2.7.10.1 2.7.11.1]	GO:0006952//defense response	GO:0043531//ADP binding	-	MALAAVGGAALGAVFGTLLDGVVAVTSKAIMFKSHLRDLKFTLDSFQQVDEDVGQHPNIVFRPMQGLERFRIQMEKGAQLVDKCSKVRPWKLNAFKKPMYTSKLVALNASLNTLLSVLTVHIISDLRARMINVETTLNHIDANIVAQYQNQYQNQIRGWCAIPEPPPFTVGLDVRVEELKMELLRDEASMLVVTGLGGCGKTTLAQMICKDQKVKEKFKDNIFFITVSKKSNCLVVQELCRKTGSLVPSFQEEAIAFNWLQEFLNTPEQDPLLLVLDDVYPDSDSLLDKLGEVKRPNHNILVTSRVKFPRFGPAYPLGTLEQGDAMTLFRHSASRTDRNSHILDNLVEQIVQLCKGFPLAITTIGRSVCEQPTEIWEKRVAELSKGSSILDSEDYLLAC…
Prupe.7G154300.1.p	10.3502	7.15351	0.000478997	0.00149309	Up	XP_007202382.1	random slug protein 5 [Prunus persica]	29.15	1e-12	sp|Q94A34|SFH12_ARATH	Phosphatidylinositol/phosphatidylcholine transfer protein SFH12 OS=Arabidopsis thaliana GN=SFH12 PE=2 SV=1	At4g36640	415	4e-147	KOG1470	Phosphatidylinositol transfer protein PDR16 and related proteins	I	Lipid transport and metabolism	K14399|1|3e-50|179|csl:COCSUDRAFT_47181|polyribonucleotide 5'-hydroxyl-kinase [EC:2.7.1.78]!K19996|2|2e-11|68.9|atr:18443032|phosphatidylinositol transfer protein SFH5!K00133|3|3e-11|68.6|aly:ARALYDRAFT_312479|aspartate-semialdehyde dehydrogenase [EC:1.2.1.11]	-	-	-	MYLLRRQAQKPSPEDDSAQKDAKVKELRAALGPLSGRNLKYCTDACLRRYLEARSWNLDKAKKMVEETLRWRATYKPEETRWHEIAHEGETGKVSRANFHDRLGRTVLIMRPAMQNTNSPEGNIRHLVYLIENGILNLPEGQEQMSWLVDFSGFSLNTNVSVKTARDIIYILQNHYPERLAVAFLYNPPRIFQAFWKAVKYFLDPKTFQKVKFVYPKGKESVELMKTFFDVENLPSEFGGQATLKYDHEEFSRMMAEDDVKTAKFWGFDEKPCRIKNGLSGAEVVPEPLPIAPIAS
Prupe.7G154700.1.p	10.5947	8.46745	0.000908646	0.00266434	Up	XP_007202678.1	AP-3 complex subunit sigma [Prunus persica]	81.33	2e-101	sp|Q8VZ37|AP3S_ARATH	AP-3 complex subunit sigma OS=Arabidopsis thaliana GN=At3g50860 PE=2 SV=1	At3g50860	252	4e-87	KOG0936	Clathrin adaptor complex, small subunit	U	Intracellular trafficking, secretion, and vesicular transport	K12399|1|3e-121|342|pper:18770256|AP-3 complex subunit sigma	GO:0006886//intracellular protein transport;GO:0016192//vesicle-mediated transport	GO:0008565//protein transporter activity	GO:0030123//AP-3 adaptor complex	MIRAVMVINTQGKPRLAKFYEFQPVEKQQEHIRSVYGVLSSRAENVSNFVDAESIFGPDTRLVYKHFATLYFVFVFDSSENELAMLDLIQVFVETLDKCFKNVCELDVVLNYSKMHTVLDEIIFGGQVLETSSTEVMKAVEEISKLETASNAISLVPKSVSAWRNR
Prupe.7G155500.1.p	1.55894	0.223489	0.000931676	0.187839	Up	XP_007202273.1	epoxide hydrolase 1 [Prunus persica]	-	-	-	-	At2g18360	442	9e-157	KOG1454	Predicted hydrolase/acyltransferase (alpha/beta hydrolase superfamily)	R	General function prediction only	K22369|1|7e-110|325|nsy:104235966|epoxide hydrolase 4 [EC:3.3.-.-]!K14759|4|4e-09|62.0|soe:110779918|isochorismate synthase / 2-succinyl-5-enolpyruvyl-6-hydroxy-3-cyclohexene-1-carboxylate synthase / 2-succinyl-6-hydroxy-2,4-cyclohexadiene-1-carboxylate synthase / O-succinylbenzoate synthase [EC:5.4.4.2 2.2.1.9 4.2.99.20 4.2.1.113]		GO:0016787//hydrolase activity	-	MVNLVALQRPLLHGLMKMAGVRPYTVELEPGTAMNFWVPNETLDKPKKGQKPTVKASPTKPVVVLVHGFAAEGIVTWQFQIGALSKKYSVYVPDLLFFGGSATDKADRSPTLQAECLAAGLRKLGVERCTVVGFSYGGMVGFKLAELYPDMVRALVVSGSILAMTCSVSDETMERLGCGNSSELLLPSSVKGLKNLLSIAAHKKLYFPDRLHKDFLEVMFTNRKEREELLEGLVIDTKDPTIPKFPQRIHLLWGENDQIFQRELAHNMKEQLGENATFEGIKKAGHLVHLERPCVYNRCLKRFLASLPHEDGAQK
Prupe.7G168300.1.p	1.11164	0.454978	0.0403579	0.367809	Up	XP_007202107.1	naringenin,2-oxoglutarate 3-dioxygenase [Prunus persica]	93.96	0	sp|Q06942|FL3H_MALDO	Naringenin,2-oxoglutarate 3-dioxygenase OS=Malus domestica PE=2 SV=1	At3g51240	622	0	KOG0143	Iron/ascorbate family oxidoreductases	QR	Secondary metabolites biosynthesis, transport and catabolism;General function prediction only	K00475|1|0.0|751|pper:18770366|naringenin 3-dioxygenase [EC:1.14.11.9]		GO:0046872//metal ion binding;GO:0016491//oxidoreductase activity	-	MAPATTLTSIAGEKTLQQKFVRDEDERPKVAYNNFSNEIPIISLAGIDEVEGRRADICKKIVEACEDWGIFQIVDHGVDTKLISEMTGLAREFFALPSEEKLRFDMSGGKKGGFIVSSHLQGEAVQDWREIVTYFSYPIRHRDYSRWPDKPEGWREVTQKYSDELMGLACKLLGVLSEAMGLDTEALTKACVDMDQKVVVNFYPKCPQPDLTLGLKRHTDPGTITLLLQDQVGGLQATRDDGKTWITVQPVEGAFVVNLGDHGHFLSNGRFKNADHQAVVNSNSSRLSIATFQNPAQEATVYPLSIREGEKPILEGPITYTEMYKKKMTKDLELARLKKLAKEQQLQDSEKEGKPKDDIFA
Prupe.7G214100.1.p	10.3161	6.97953	0.0031462	0.00812377	Up	XP_007202722.1	probable phospholipase A2 homolog 1 [Prunus persica]	69.81	6e-55	sp|Q9XG80|PLA21_ORYSJ	Probable phospholipase A2 homolog 1 OS=Oryza sativa subsp. japonica GN=PLA2-I PE=2 SV=1	-	-	-	-	-	-	-	K01047|1|9e-57|178|mus:103978222|secretory phospholipase A2 [EC:3.1.1.4]	GO:0006644//phospholipid metabolic process;GO:0050482//arachidonic acid secretion;GO:0016042//lipid catabolic process	GO:0005509//calcium ion binding;GO:0004623//phospholipase A2 activity	GO:0005576//extracellular region	MSMSRDAGLRRTTSFAAAFAVVIFSLIAVARCSNNDSEVTCSRICVAENCNSVGIRYGKYCGVGWTGCPGEKPCDDLDACCKIHDDCVGKKGMTDIKCHEKFKTCIKKVQKSGKVGFSQQCPYETAVPTMVQGMDLAIMLSQFSNSKLEL
Prupe.7G221400.1.p	10.3946	7.38023	0.0257469	0.0484154	Up	XP_020424347.1	golgin candidate 1 isoform X1 [Prunus persica]	60.72	0	sp|Q8S8N9|GOGC1_ARATH	Golgin candidate 1 OS=Arabidopsis thaliana GN=GC1 PE=2 SV=2	Hs4826748	67.8	4e-11	KOG4677	Golgi integral membrane protein	UR	Intracellular trafficking, secretion, and vesicular transport;General function prediction only	-	-	-	-	MSSWLKAAEDLFEVVDRRAKLVVSELDDQLATQSPASNGQGSQAKRKKSKTKAQKRQSMNESPNTSDSAREQTSILTSQVDATPEIDSDAHLNDNDGTPSVNPSSQPINEKQQNLEKDSTVSIPLTETTAIEVGQSNAHEAEASTTSTDKEAVTSTSNGELVNEIPSDGHEEHPFPLSAKEVEVVDENHQVESVDAGQENKSRDADVHPETDQNRTESTTTTAISNRETQSKVADVNEEPVIEQSKQVEHKAGSTPVKVQEQDQSKQVEHKAGSTPAKVQELDQSKQLEHKAGSTPVKVQEQDQIEEAQGLLKTAVSTGQSKEARLARVCAGLSSRLQEYKSENAQLEELLVSERELNKSYEARIKQLQKDLSASKSDVTRIESNMVEALAAKNSEIEA…
Prupe.7G227500.1.p	1.98726	0.384276	0.0035506	0.236732	Up	XP_007202641.2	strigolactone esterase D14 [Prunus persica]	44.62	2e-82	sp|Q10QA5|D14_ORYSJ	Strigolactone esterase D14 OS=Oryza sativa subsp. japonica GN=D14 PE=1 SV=1	CE08627	55.1	4e-08	KOG4409	Predicted hydrolase/acyltransferase (alpha/beta hydrolase superfamily)	R	General function prediction only	K13699|1|2e-08|58.9|ini:109149713|abhydrolase domain-containing protein 5 [EC:2.3.1.51]	-	-	-	MVLEKSLSSAINTKIMGSSGSEETIVLAHGYGGDQSVWDKIVPYLAEHYRVVVFDWPFSGAVNNKDLFDPSKYSSYDAFANDLIALLDELNLKSTVFVGHSMSGMIGCIASINRPDLFKTLILIGASPRYINTEDYEGGLEMSDITQIISAIESNYHNWAAYFASLAVDPNDPLSVDKFVKCLRRMRPEVALALAKTVFYSDQRDVLDQVSTPCTIINTSSDIVAPNSVAFYMQKKIKGKSTVEIINTNGHFPQLTAHLELLDVLGKVLGLKFDHQDPDIVGVN
Prupe.7G242100.1.p	10.4166	7.48354	0.00419891	0.0106045	Up	XP_007202318.1	probable sugar phosphate/phosphate translocator At4g32390 [Prunus persica]	82.61	0	sp|Q9SUV2|PT432_ARATH	Probable sugar phosphate/phosphate translocator At4g32390 OS=Arabidopsis thaliana GN=At4g32390 PE=3 SV=1	At4g32390	587	0	KOG1441	Glucose-6-phosphate/phosphate and phosphoenolpyruvate/phosphate antiporter	GE	Carbohydrate transport and metabolism;Amino acid transport and metabolism	K15285|1|2e-30|122|han:110941368|solute carrier family 35, member E3!K15280|3|2e-29|120|cme:CYME_CMK248C|solute carrier family 35, member C2			GO:0016021//integral component of membrane	MGLSEGVVKKVLLSYAYVAIWIFLSFTVIVYNKYILDHKMYNWPFPISLTMIHMGFCSSLAYLLVRVFKLVEPVSMSRDLYLKSVVPIGALYALSLWFSNSAYIFLSVSFIQMLKALMPVAVYSIGVVFKKDPFKSDTMLNMVSISVGVAIAAYGEAKFNSWGVALQLLAVAFEATRLVLIQILLNAKGISLNPITSLYYVAPCCFVFLCVPWVIVELPVLRETSSFHFDFVIFGTNSVCAFALNLAVFLLVGKTSALTMNVAGVVKDWLLIAFSWSVIKDTVTPVNLIGYLIAFLGVAYYNHAKLQALKALEAQRKSQQDNLEAGRLLEERDGEGTGKKNETQD
Prupe.7G262100.1.p	9.84443	5.03156	3.46215e-05	0.00014093	Up	XP_007202123.1	choline/ethanolaminephosphotransferase 1 [Prunus persica]	82.78	0	sp|O82567|AAPT1_ARATH	Choline/ethanolaminephosphotransferase 1 OS=Arabidopsis thaliana GN=AAPT1 PE=1 SV=1	At1g13560	685	0	KOG2877	sn-1,2-diacylglycerol ethanolamine- and cholinephosphotranferases	I	Lipid transport and metabolism	K00993|1|0.0|793|pper:18771515|ethanolaminephosphotransferase [EC:2.7.8.1]	GO:0008654//phospholipid biosynthetic process	GO:0016780//phosphotransferase activity, for other substituted phosphate groups	GO:0016021//integral component of membrane	MGYIGAHGVAALHKYKYSGVDHSYTAKYVLQPFWSRFVKIFPLWMPPNMITLTGFMFLLTSALLGYIYSPRLDSAPPRWVNFAHGLLLFLYQTFDAVDGKQARRTNSSSPLGELFDHGCDALACAFEGLAFGSTAMCGRTTFWFWVISAVPFYCATWEHYFTNTLILPAVNGPTEGLMLIYFAHFFTAIVGSEWWAQPFGKSLPFLSWVPFIHEITTYKAVLFLMVAFAVIPTLTFNVCNVYKVVQTKKGSMLLALAMLYPFAVLLGGVLAWGYLSPADIMGNYPHLVVVGTGLAFGYLVGRLILAHLCDEPKGLKTGMCMSLLYLPFAIANALTARLNDGVPLVDESLVLLGYCAFTATLYLHYATSVVHEITTALGIYCFRITRKEA
Prupe.7G265200.1.p	-10.591	8.45399	2.06047e-05	0.000118828	Down	XP_007203774.1	heat shock 70 kDa protein [Prunus persica]	90.21	0	sp|P26413|HSP70_SOYBN	Heat shock 70 kDa protein OS=Glycine max GN=HSP70 PE=3 SV=1	At1g16030	1171	0	KOG0101	Molecular chaperones HSP70/HSC70, HSP70 superfamily	O	Posttranslational modification, protein turnover, chaperones	K03283|1|0.0|1342|pper:18770162|heat shock 70kDa protein 1/2/6/8		GO:0005524//ATP binding	-	MATKTEGKAIGIDLGTTYSCVGVWQNDRVEIIANDQGNRTTPSYVAFTDTERLIGDAAKNQVAMNPQNTVFDAKRLIGRRFSDPSVQSDMKLWPFKVIPGPGDKPMIVVRYKGEEKTFSAEEISSMVLTKMREIAEAYLGQTIKNAVVTVPAYFNDSQRQATKDAGAISGLNVMRIINEPTAAAIAYGLDKKASRKGEQNVLIFDLGGGTFDVSLLTIEEGIFEVKATAGDTHLGGEDFDNRMVNHFVAEFRRKHKKDISGNARALRRLRTACERAKRTLSSTSQTTIEIDSLYEGIDFYATITRARFEELNMDLFRKCMEPVEKCLRDAKIDKSQVHDVVLVGGSTRIPKVQQLLQDFFNGKELCKSINPDEAVAYGAAVQAAILSGEGDEKVQDLLL…
Prupe.8G000400.1.p	-10.5833	8.40918	2.07145e-05	0.000118828	Down	XP_007200247.1	22.0 kDa class IV heat shock protein [Prunus persica]	71.59	9e-87	sp|P19244|HSP41_PEA	22.7 kDa class IV heat shock protein OS=Pisum sativum GN=HSP22.7 PE=2 SV=1	At4g10250	249	2e-84	KOG0710	Molecular chaperone (small heat-shock protein Hsp26/Hsp42)	O	Posttranslational modification, protein turnover, chaperones	K13993|1|4e-142|397|pmum:103331667|HSP20 family protein	GO:0009408//response to heat		GO:0005783//endoplasmic reticulum	MRQLRSLVLTLSFLLVFLSAGSSNASLLPFVDRRPESLLVDLWSERFPDPFRVLEQIPFELDKEDGVALSPARVDWKETPEGHVIMLDVPGLKKEELKIEVEANRVLRVSGERKREEEKKGDHWHRVERSYGKFWRQFRLPENVDLDSVNAKLENGVLTLTLAKLSPDKIKGPKVISIASTGGHEDEPAQLKASEVKQEL
Prupe.8G003700.1.p	10.3101	6.9504	2.50626e-05	0.000118828	Up	ONH89605.1	hypothetical protein PRUPE_8G003700 [Prunus persica]	71.2	0	sp|F4JLK2|SPSA4_ARATH	Probable sucrose-phosphate synthase 4 OS=Arabidopsis thaliana GN=SPS4 PE=1 SV=1	At4g10120	1505	0	KOG0853	Glycosyltransferase	M	Cell wall/membrane/envelope biogenesis	K00696|1|0.0|2031|pper:18768098|sucrose-phosphate synthase [EC:2.4.1.14]	-	-	-	MAGNDWLNGYLEAILDAGSNTRKMNDGRVKIAKFEEQVKEEKMFSPTKYFVEEVINSFDESDLHRTWVKVIATRNTRERSNRLENTCWRIWHLARKKKQIAWDDARRLAKRRLEREQGRHDAEDDLSELSEGEKEKEGEKEKGEPLVKDILRTISDIRIWSDDIDKSRHLYIVLISIHGLIRGENMELGRDSDTGGQVKYVVELARALANTKGVYRVDLLTRQITSPEVDSSYGEPNEMLICPPDGSGSCGAYIVRIPCGPRDKYIPKESLWPHIPEFVDGALGHIVNMARALGEEVNGGRPKWPYVIHGHYADGGEVAAHLSGALNVPMVLTGHSLGRNKFEQLLKQGRLSKGDINATYKIMKRIEAEELGLDSAEMVVTSTRQEIEEQWGLYDGFDL…
Prupe.8G034100.1.p	3.03536	1.06282	0.0212832	0.307079	Up	XP_007201299.1	glycine-rich protein 2 [Prunus persica]	73.91	1e-21	sp|P37219|ASR2_SOLLC	Abscisic stress-ripening protein 2 OS=Solanum lycopersicum GN=ASR2 PE=4 SV=1	-	-	-	-	-	-	-	K20478|1|3e-23|100|mesc:110607907|golgin subfamily B member 1	GO:0006950//response to stress	-	-	MSEEKHHHGLFHHHKDEDRPIETSDYPQSGGYSDEGRTGSGYGGGGGYGDGGGGYGDNTAYSGEGRPGSGYGGGGGYGESADYSDGGRYKETAAYGTTGTHESEIDYKKEEKHHKHLEHLSEAGAAAAGVFALHEKHESKKDPEHAHRHKIEEEIAAAAAVGSGGFAFHEHHEKKEAKEEEEESHGKKHHHLF
Prupe.8G070100.1.p	10.4926	7.90887	0.00128515	0.00358599	Up	XP_007200554.1	uncharacterized protein LOC18766157 [Prunus persica]	-	-	-	-	-	-	-	-	-	-	-	-			GO:0016021//integral component of membrane;GO:0005774//vacuolar membrane	MSTNNGEADVEGSGRRTSPTSSNTRLRMRADPFLVCCRCFSVVTALTAVLCIVVNVFSAIESFKDGSDVFDGIFRCYAVLIAIVVVVAETEWAFFIKFWKVLEYWVGRGMLQVFVAVMTRAFPDETGTRKELVLLQNIASYMLLACGGVYIISGILCIGFLKRARQKTEISREQAIKDLEDLERRREELEHLLIVERD
Prupe.8G119500.1.p	1.49862	0.594304	0.0357173	0.356446	Up	XP_007199852.1	polyadenylate-binding protein RBP47 [Prunus persica]	63.29	1e-180	sp|Q9LEB3|RBP47_NICPL	Polyadenylate-binding protein RBP47 OS=Nicotiana plumbaginifolia GN=RBP47 PE=1 SV=1	At3g19130	499	2e-175	KOG0118	FOG: RRM domain	R	General function prediction only	K03231|1|1e-104|323|cam:105852306|elongation factor 1-alpha		GO:0003723//RNA binding	-	MAQQSNGGDLGTQQQQQQQQQQQQQQQQWMHQHQHQQQWMAMQYPAAAMAMMQQQMMVYPQHYMPYAAAAAHPHHPHHNPYQQQPQGVPYQQQQQPPKQLQQSPSQKQGPTDEIRTIWVGDLHHWMDETYLHGCFAHTGQVSTVKVIRNKQTAQSEGYGFVEFFSREAAEEVLQSYNGAAMPNTEQPFRLNWATFSAGDRRADTSSDLSIFVGDLATDVTDTMLQETFGSRYSSVKGAKVVLDANTGRSKGYGFVRFGDENERSRAITEMNGAYCSSRPMRIGVATPKKSPAYQQQYSSQALVLAGGGHASNGAVAQGSQFDSETNNTTIFVGGLDSDVNDEDLRQPFSQFGEVVSVKIPVGKACGFVQFANRKDAENAMQMLNGTVIGKQTVRLSWGR…
Prupe.8G123900.1.p	10.4036	7.41642	2.34876e-05	0.000118828	Up	XP_007201342.1	calmodulin-like protein 1 [Prunus persica]	63.04	1e-80	sp|Q9ZQE6|CML1_ARATH	Calmodulin-like protein 1 OS=Arabidopsis thaliana GN=CML1 PE=2 SV=1	At2g15680	237	3e-80	KOG0027	Calmodulin and related proteins (EF-Hand superfamily)	T	Signal transduction mechanisms	K13448|1|2e-137|385|pper:18767408|calcium-binding protein CML		GO:0005509//calcium ion binding	GO:0005739//mitochondrion	MSSANFLDFQYNLSKRKFLRKPSHVFSFRDRQNSGVSPSFEPNPNEMKRVFDKFDSNKDGKISQPEYKAILRALGKGNMVGEVPKIFRIADLDGDGFINFKEFMEVHKKGGGIRTIDIQNAFRTFDLNGDGKISAEEVMEVLGRLGESCSLEDCQRMVRAVDTDGDGVVDIDEFMTMMTRSMKTCLEN
Prupe.8G137900.1.p	10.4857	7.89842	0.00301763	0.00785038	Up	XP_007199763.1	probable indole-3-acetic acid-amido synthetase GH3.1 [Prunus persica]	80.4	0	sp|O82333|GH31_ARATH	Probable indole-3-acetic acid-amido synthetase GH3.1 OS=Arabidopsis thaliana GN=GH3.1 PE=2 SV=1	-	-	-	-	-	-	-	K14487|1|0.0|1244|pper:18768891|auxin responsive GH3 gene family	-	-	-	MAVDSSLSPLGPPACEKDAKALKFIEETTRNADPVQERVLAEILARNAETEYLKRYKLGGATDRETFKSKLPIISYEDLQPEIQRIANGDRSPILSAHPISEFLTSSGTSAGERKLMPTIQEELDRRQLLYSLLMPVMNLCVPGLDKGKGLYFLFVKSETKTPGGLLARPVLTSYYKSEHFKTRPYDPYNVYTSPNEAILCPDSFQSMYAQMLCGLLERNQVLRLGAVFASGLLRAIRFLQLNWQQLVNDIRTGTLNPKITEPNLKSCMDGILKPDPELADFVSKQCGDENWDGILTRIWPNTKYLDVIVTGAMAQYIPTLEYYSGGLPMACTMYASSECYFGLNLNPMCKPSEVSYTIMPNMAYFEFLPYDPNSASRGDSMTTRLVDLVNVEVGREYE…
Prupe.8G142300.1.p	-10.4183	7.4998	0.00486983	0.0118659	Down	XP_007201732.1	BTB/POZ domain-containing protein NPY2 [Prunus persica]	62.38	0	sp|O80970|NPY2_ARATH	BTB/POZ domain-containing protein NPY2 OS=Arabidopsis thaliana GN=NPY2 PE=2 SV=1	-	-	-	-	-	-	-	-	GO:0009958//positive gravitropism		GO:0071944//cell periphery	MKFMKLGSKPDSFQTDGNNVRYVATDLATDIIVNVGDSKFYLHKFPLLSKSARLQKLVANTNESNTGEIYISDIPGGPAAFEICAKFCYGMTVTLNAYNVVVSRCAAEYLGMHESIEKGNLIYKIDVFLSSSIFRSWKDSIIVLQTTKSLLPISEELKLVSQCIDSIATKACVDVSQVDWSYTYNRKKIPEENGNDPNWNGVRNRPVPKDWWVEELCELEIDLYKRVLTNIKTKAVLSAEVIGEALKAYAYRRFPGFSKGMIQGGDMAKHRSTVDTIVWLLPEEKGGASCSFLLKMLKAAIFLDSGDMTKGELVRRIGQQLEEASVNDLLIRAAEGEPTIYDVTVVQKIVEEFLRQDQSAVEERHELLEVRRPGILSDASKLMVAKLIDGYLAEISKDP…
Prupe.8G150300.1.p	1.13392	0.290635	0.0298906	0.335686	Up	XP_020425917.1	pre-mRNA-processing protein 40A isoform X1 [Prunus persica]	44.69	0	sp|F4JCC1|PR35B_ARATH	Pre-mRNA-processing protein 40B OS=Arabidopsis thaliana GN=PRP40B PE=1 SV=1	At3g19670	756	0	KOG0152	Spliceosomal protein FBP11/Splicing factor PRP40	A	RNA processing and modification	K12821|1|0.0|2144|pper:18767898|pre-mRNA-processing factor 40	-	-	-	MANNPQFSGLQPLRPPMVGSVDPPRSLPPMSFQFRPVVPAPHSQEFISVASQNFQHVGRGVPLMNVRLPPPTHQPQFSQPMQQLPPRSGQPGHGMLPSQAIPLPVSQPNRNFASELPLPQPNSQGPNNAMPNLGGPRTPLSSSYTFAPSSYGQMPRSFNDSTQYQSISQLHAPNVSSEGQVTPLQYTGERPAVTSSIAPETGVRPNSAGGTVAEWREHTSAEGRRFYYNRRTGLSTWEKPFELMTPLERADASTNWKEFTSPDGRKYYYNKVTKESRWIMPEELKLARELVEKAPVKEMQQEMLVNHHAPVTVSPPVAEADTLVNAAQVASSPVSVAPVIATGDGDVQTAAASRSSTSPVVASPVIENPNGVHTPVVVPSSTVSSVEAAVTINDTVAEP…
Prupe.8G157400.1.p	1.00317	0.23423	0.0233878	0.318577	Up	XP_007199853.1	uncharacterized protein LOC18768606 [Prunus persica]	-	-	-	-	-	-	-	-	-	-	-	K03100|1|2e-20|98.6|tcc:18591278|signal peptidase I [EC:3.4.21.89]	-	-	-	MALQALFFILLTTQFLPSSSLISKPDFHSRYPSPRAISDLKESIVKGLGFPAEDLEVSGFDLRDAQVGHSVAYEFDVEVDNKVLPFKLLEDVDRWDYVDLPIFRVEDENGLVQKGKSGTGLPPVLAPFQLAGPMELWIQDAKDMRISLPHDVDAGVLKKVMLAEGAVVTVKGARSVSLRHPLQLPLPLNRTNNGFASGLVTLAEWLRHASRTQTSPLLSLRIVGPTSLASPSPTSSSMNNKLKLKRLAPGLVELSSPSTTKPISVELQNQETTAILTPSYFTTVWPLASVNGSNPNLLGFEALLSSVLGHKANKKGSFKLLKADVSAQTFLKIGFGVEKKLKEGDGFDLKGFPEWRTKPETVRMHFEVLAKVDGDKIVPERVVPINPVVLEDTVAPNEL…
Prupe.8G161300.1.p	1.01583	0.203354	0.0010589	0.191631	Up	XP_020425412.1	eukaryotic translation initiation factor 4B3 [Prunus persica]	50.36	6e-78	sp|Q9SZP8|IF4B3_ARATH	Eukaryotic translation initiation factor 4B3 OS=Arabidopsis thaliana GN=EIF4B3 PE=1 SV=1	-	-	-	-	-	-	-	K02893|1|1e-08|59.7|var:108336756|large subunit ribosomal protein L23Ae	-	-	-	MAATVSPWAKPGAWALAAEEQDAELEQETQNARHVVEPPSADYPSLSVAATAKPKKKNKGQKISLAEFTAFGAPKPVAQPEGLTHQDRMHLPTGPRERTAEELDRNRLGGGFRSYGSDRGNSRFSNGEESSDSKWGSGQRREGGFGKESNRDGPSRADEIDDWGAAKKSTVGNGFERRERGAGGSFFGGSQSKADESDSWVSNKSSVSSEGRRFGASGGGFDRERKVGFTSDGGADSDNWGRKKEESNGGSGFDRERRVGFVSNGGGADSEVWGKKKEESNGGLSESTGRPRLNLQPRTLPVSNETSPGSTTVPKSKGSNPFGEARPREEVLAEKGKDWKKIDEELESVKIKEVAERDHSPSFGKRSFGIGNGRAGDRTERAWRKPDVADARPQSAEEN…
Prupe.8G177800.1.p	10.3765	7.28608	0.0230623	0.0436487	Up	XP_007200374.1	sorcin [Prunus persica]	27.07	4e-10	sp|Q2QY37|CDPKQ_ORYSJ	Calcium-dependent protein kinase 26 OS=Oryza sativa subsp. japonica GN=CPK26 PE=2 SV=1	Hs7019485	76.3	3e-17	KOG0037	Ca2+-binding protein, EF-Hand protein superfamily	T	Signal transduction mechanisms	K13412|1|4e-12|67.4|sind:105174573|calcium-dependent protein kinase [EC:2.7.11.1]		GO:0005509//calcium ion binding	-	MENSAVLREWFARVDSANTGSITAPQLKNALAVGNLDFPISVVQQMIRMYDFDRNGTMSFEEFVALNKFLLKVQQAFSDRERGRGYIVPDDVHEALVKIGFSLDSPAFYTVCESFDKKKKGMFRLDDFISLCIFLQSARNLFNSFDTAKQGRVSLDLNQFVFCTANCRI
Prupe.8G178200.1.p	9.93456	5.35684	0.00716554	0.0159953	Up	XP_007200445.1	uncharacterized protein LOC18767609 [Prunus persica]	-	-	-	-	-	-	-	-	-	-	-	-	-	-	-	MVQQTIDSKFSEYGMGATESELPVHDKQLSVPVKKTALRDLQNDIRVAMPNSFGNSPLLKDGGHISNAPRVSGTKRPLPEPECPMSLPQHQLPSSSAANGHLVYVRRKSEADVVRSSTCDNASINADCQVSRTLSHHEASTRPSHHETSTRPSHQEASARPIFQTKESKVYCIPAFAPFPMSASTIQPGKPSVSAPHCKSGIRIAPSGSNPLASATQTLAGSKGLRNLHWEARCHQLQLLLRKLDQSEQEDYLHMLRSLSSVDLSRHAVELEKRSIQLSLEEAKELQRVGFLNVLGKPAKQFKVPSTHQDRSDK
Prupe.8G185300.1.p	-10.3769	7.28728	2.39039e-05	0.000118828	Down	ONH92630.1	hypothetical protein PRUPE_8G185300 [Prunus persica]	34.94	1e-153	sp|Q40392|TMVRN_NICGU	TMV resistance protein N OS=Nicotiana glutinosa GN=N PE=1 SV=1	At1g47370	90.5	1e-18	KOG0619	FOG: Leucine rich repeat	R	General function prediction only	K22038|2|1e-173|539|spen:107030488|volume-regulated anion channel	-	-	-	MALPPHSYDVFLSFRGEDTRKTFTDHLYTAFVNAGFRTFRDDDELERGEDIKPELQRAIQQSRSSVIVFSKNYASSRWCLDELVMILERKRTSDHVVLPVFYDVDPSQVRKPTASLATAFVKNGSLKVKVEKWRAALTEVADLAGMVLQNQADGHESKFIKKIVKVIEGKLSRTAFNVAPHLIGIHSRVRDINLWLHDGSTKVRVLLIYGMRGIGKTTLAKFVYNINFKRYKGSSFLENIKEHSKQTNGLVQIQKKLLSDVLNGKRVKVGNISEGIIKIEDALSSKRVLLVFDDVDHVEQLDAVLRMQGQFCPGSKIIITTSHAALLNASHQAIKVHNLETFNSNESLELFSWHAFGQDHPEKDYMELSERVVNLSGGLPLALKILGSSLSGKSTVVWE…
Prupe.8G197600.1.p	1.50058	0.474681	0.0133699	0.271426	Up	XP_007200288.1	putative G3BP-like protein [Prunus persica]	35.54	6e-09	sp|Q9XJ54|NTF2_ORYSJ	Nuclear transport factor 2 OS=Oryza sativa subsp. japonica GN=NTF2 PE=2 SV=1	At3g25150	359	5e-119	KOG0116	RasGAP SH3 binding protein rasputin, contains NTF2 and RRM domains	T	Signal transduction mechanisms	K17265|1|0.0|523|fve:101309784|Ras GTPase-activating protein-binding protein 1 [EC:3.6.4.12 3.6.4.13]	GO:0006810//transport	GO:0003723//RNA binding;GO:0003729//mRNA binding	GO:0005622//intracellular	MTIPVQQAPASNLPPSADVVGNAFVLQYYNILEQSPQLVHRFYQDISKLGRPGDDGIMSITTTMDAINKKILDYGELSANIVTVDAQESYNGGVFVLVTGFLTGKDNIRKKFTQSFFLAPQDVGYFVLNDVFRYVDDSTPQNGDNGLVVDAAVEAPLTPKHDTTALQGYHVSEPVVVVSEDVAKEEVYNPTENGEVSIEEEEAPVPEVVNEIPDDSQVVAESYSIVEAKSNSKVEAESNSKVEAESNSKIEAESNSKVEVPKKSYASILKIMKESTVPFSTPAAASARSVPKKQEQQVTAAPTSVPVSETVVSSTNARENGNLEAEAEGHSIYIKGLPMNSTNALIENEFKKFGLIKQNGVQVRSLKGFCFGFVEYEAASSVHSAMEASPIMIGNRQIF…
Prupe.8G217000.1.p	10.4083	7.44697	0.0205501	0.0397226	Up	XP_020425862.1	MDIS1-interacting receptor like kinase 2 [Prunus persica]	44.23	0	sp|Q8VZG8|MIK2_ARATH	MDIS1-interacting receptor like kinase 2 OS=Arabidopsis thaliana GN=MIK2 PE=1 SV=3	At2g34930	311	1e-89	KOG0619	FOG: Leucine rich repeat	R	General function prediction only	K04733|1|0.0|707|pavi:110771929|interleukin-1 receptor-associated kinase 4 [EC:2.7.11.1]	-	-	-	MEGGVFSAQSQKPTYLLLLLHIFLLALLPFKAISSPKTQAEALLTWKNTFASAPPSLTSWSLTNLNNLCNWTAIVCDHSTKQVSQIDLSNFNISATLTHFNFTPFLNLTQFNLNGNNFTGPVPSAVGNLSKLTTLDLGNNLFIQEIPVQIGMLTELQYLSFFNNTLTGVIPYQLSNLQKVQFLILGGNYLETPDWSKFSGMPSLTYLDFYLNSLDSEFPEFISKCLNLTFLDLSQNAFTGQIPEVVFTNLGKLEFLNLTNNQFQGPLPTSFPKLKHLNLALNHFGGPIPEDIGFISGLERIELLNTSLEGPIPSSLGQLRELKYLDLRYNSLNSSIPYELGLCTNLTYLALASNFLSGELPLSLSKLTKIGELGLSGNSFTGPLLPSLVSNWTEMVSLQ…
Prupe.8G224300.1.p	-1.09504	0.399198	0.0335978	0.348869	Down	XP_007201857.1	actin-depolymerizing factor [Prunus persica]	79.45	3e-88	sp|Q9ZSK2|ADF6_ARATH	Actin-depolymerizing factor 6 OS=Arabidopsis thaliana GN=ADF6 PE=1 SV=1	At2g31200	231	3e-79	KOG1735	Actin depolymerizing factor	Z	Cytoskeleton	K05765|1|3e-107|305|pper:18767184|cofilin	GO:0030042//actin filament depolymerization	GO:0003779//actin binding	GO:0015629//actin cytoskeleton	MSFRGLSRPNASCAMGVSDDSKNTFMELQRKKVHRYVIFKVDEKKREVVVEKIGGPAESYDDFAAALPENDCRYAVYDFDFVTSENCQKSKIFFIAWSPSTSRIRAKMLYATSKDRFRRELDGIHYEIQATDPSEMDLEVLRDRAH
Prupe.8G227700.1.p	1.45407	0.249214	0.000640533	0.187839	Up	XP_007201819.1	deoxyhypusine hydroxylase-B [Prunus persica]	78.67	3e-168	sp|Q94JW0|DOHH_ARATH	Deoxyhypusine hydroxylase OS=Arabidopsis thaliana GN=At3g58180 PE=1 SV=1	At3g58180	446	7e-159	KOG0567	HEAT repeat-containing protein	R	General function prediction only	K06072|1|0.0|639|pper:18768946|deoxyhypusine monooxygenase [EC:1.14.99.29]	GO:0008612//peptidyl-lysine modification to peptidyl-hypusine	GO:0019135//deoxyhypusine monooxygenase activity;GO:0046872//metal ion binding	-	MGSLNEDGTTTSFESSPEMVKFLCDRLLDPTQPISERFRALFSLRNLKGPGPRNALITATRDSSNLLAHEAAFALGQMQDADAIPALVAVLNDLSLHPIVRHEAAEALGAIGLESNVPLLENSLALDPAQEVKETCALALNRIEQLKDSGNQSLDEKSPFMSVDPAAPATSSSSVNQLREVLLDEKKNMYERYAALFALRNNSGDEAVSAIVDSLGSKSALLRHEVAYVLGQLQNKDASAALSNILMDRNEHPMVRHEAAEALGSIADDQSVSLLEEFAKDPEPIVSQSCEVALSMLEFERSGKSFEYLFMQAPPVQ
Prupe.8G247100.1.p	10.1044	6.02629	0.00512676	0.0124046	Up	XP_007201711.1	uncharacterized protein LOC18767759 [Prunus persica]	-	-	-	-	At4g02940	580	0	KOG4176	Uncharacterized conserved protein	S	Function unknown	K10767|1|2e-34|138|ini:109165839|mRNA N6-methyladenine demethylase [EC:1.14.11.53]		GO:0016491//oxidoreductase activity	-	MAMAVGPAASPTDGAAPVLGPAMMHMQMPTPAPVAMVSDAMAKDAIIGWYRGEFAAANAIIDSLCGHLTQLSGGGAEYGAVFAAIHRRRINWIPVLQMQKYHSIADVMVELRNVGAKKAEKESEENGEVSGTDENCKSEEAKSCLDEEKEKENEKVEESNGNDAADEAIEEEASPDSEITDSGSQEAQLNSVNVEICSNHEECEARRTEIKLTKGFSAKESVKGHMVNVVKGLKLYEDIFTDSELFKLTDFVNELHAAGLNGELSGETFILFNKQIKGNRRELIQFGVPIFGQIKEETTSNIGPIPALLQDVVDHFVLWQLIPEYKRPNGCIINFFEEGEYSQPFLKPPHLDQPIATLLLSESTMAFGRTLLSDNDGNYKGPLMLSLKEGSLLVMRGNS…
Prupe.8G262000.1.p	10.5738	8.34553	0.000178117	0.000610182	Up	XP_007199831.1	blue-light photoreceptor PHR2 [Prunus persica]	69.13	0	sp|Q8LB72|PHR2_ARATH	Blue-light photoreceptor PHR2 OS=Arabidopsis thaliana GN=PHR2 PE=2 SV=2	At2g47590	605	0	KOG0133	Deoxyribodipyrimidine photolyase/cryptochrome	LT	Replication, recombination and repair;Signal transduction mechanisms	K01669|1|2e-136|403|ppp:112291769|deoxyribodipyrimidine photo-lyase [EC:4.1.99.3]	-	-	-	MDPNLQVSENPESKSSEEPNSLAIVPSSSLPPFATASLSLSLSTILPTHFFQQPKVSTLFSSQPNKVKVPTQASSLAHLSLSTANVTPPKLSFKSTISANPLQNPLSLGPRRPLDPSNGAAIRRASIVWFRNDLRVHDNECLNSANNESMSVLPVYCFDPRDYGKSSSGFDKTGPYRASFLVESVSDLRKNLQARGSDLVVRIGKPETVLVELAKAIGADAIYAHREVSHDEVKAEDKIEAAMKEENVEVKYFWGSTLYHMDDLPFKLEEMPTNYGGFREKVKGLEVRKTIEALEQMKGLPSRGDVEPGDIPSLMDLGLNPSATMSQDGRPAANASMVGGEAEALERLKKFAAECQAQPPKSGKDGSHDSIYGANFSCKISPWLAMGCLSPRSMFDELK…

## Sheet: 372 DEPs in WL vs CK
Supplementary Table S3 List of DEPs in comparison groups
Protein	log2FC	SE	pvalue	adj_pvalue	Class	Nr_Accession	Nr_Description	Swissprot Identity	Swissprot E-value	Swissprot Accession	Swissprot Description	Protein_or_Domain	KOG Score	KOG E-value	KOG ID	KOG Function-Description	KOG Code	KOG Function-Categories	KEGG(ko_id|rank|evalue|score|db_id|ko_definition)	GO Biological_Process	GO Molecular_Function	GO Cellular_Component	Sequence
Prupe.1G014300.1.p	1.26037	0.220745	0.000449373	0.093889	Up	XP_007225992.1	probable prefoldin subunit 2 [Prunus persica]	65.77	6e-65	sp|Q9LJ98|PFD2_ARATH	Probable prefoldin subunit 2 OS=Arabidopsis thaliana GN=At3g22480 PE=2 SV=1	At3g22480	194	1e-64	KOG4098	Molecular chaperone Prefoldin, subunit 2	O	Posttranslational modification, protein turnover, chaperones	K09549|1|4e-104|297|pper:18791884|prefoldin subunit 2	GO:0006457//protein folding	GO:0051082//unfolded protein binding	GO:0016272//prefoldin complex	MASSKAEGDQKEYVNEQAVANKFAAMRSELNQIYSKITELEMEASEHSLVISAIQPLDPSRRCYRMIGGVLVERTIKEVLPAVQRNKEGIEEVIARLNEALEKKKKEISDFEAKYKIKIRKEQGEEKDDGARKEGTAQGVLVGPAGGSE
Prupe.1G032400.1.p	1.31808	0.352869	0.00574371	0.178961	Up	XP_007224127.1	glu S.griseus protease inhibitor [Prunus persica]	52.05	2e-17	sp|P24076|BGIA_MOMCH	Glu S.griseus protease inhibitor OS=Momordica charantia PE=1 SV=1	-	-	-	-	-	-	-	-	GO:0009611//response to wounding	GO:0008233//peptidase activity;GO:0004867//serine-type endopeptidase inhibitor activity	-	MASDQCQGSTGKYVWPELLGVEGTVAEATIERENSTVKVEVVLEGTIVPADFVCVPDRVRVWVDTDGLVTRVPVIG
Prupe.1G038900.1.p	-1.33485	0.456265	0.0191263	0.243705	Down	XP_007225114.1	cryptochrome-1 [Prunus persica]	68.82	0	sp|Q96524|CRY2_ARATH	Cryptochrome-2 OS=Arabidopsis thaliana GN=CRY2 PE=1 SV=2	At1g04400	791	0	KOG0133	Deoxyribodipyrimidine photolyase/cryptochrome	LT	Replication, recombination and repair;Signal transduction mechanisms	K12119|1|0.0|1341|pper:18789007|cryptochrome 2		GO:0009882//blue light photoreceptor activity	-	MGSNKTIVWFRRDLRIEDNPALAAAARDGSVFPVYIWCPQDEGQFYAGRVSRWWLKQSLAHLDHSLRSLGAELVLIRTQSTLAALLECIEAIGATKVVFNHLYDPISLVCDHNIKGKLVELGISVQSYNADLLNEPWEVYDARGQAFTTFEAYWDKSLNMQRELVTLLPPWKLVPATGNVAKCSIEELGLENETEKSSNALLARAWSPGWSNADKALSEFSELHLLQYSKNRTKVGQNSTSLLSPYLHFGELSVRKVFQLARMKQILWAKEGNSIGVESVTLFLRAIGLREYSRYLCFNFPFTHERPLLSNLNFFPWQADQNNFKAWRQGRTGYPLVDAGMRELWATGWIHNRIRVIVSSFAVKVLLLPWKWGMKYFWDTLLDADLESDILGWQYISGS…
Prupe.1G067700.1.p	10.4004	7.40082	0.00816515	0.0146356	Up	XP_020410797.1	isoamylase 1, chloroplastic isoform X2 [Prunus persica]	78.19	0	sp|O04196|ISOA1_ARATH	Isoamylase 1, chloroplastic OS=Arabidopsis thaliana GN=ISA1 PE=1 SV=1	At2g39930	1234	0	KOG0470	1,4-alpha-glucan branching enzyme/starch branching enzyme II	G	Carbohydrate transport and metabolism	K01214|1|0.0|1676|pper:18790280|isoamylase [EC:3.2.1.68]	-	-	-	MEQQQHQLTNCSTWSTAPKLHHLLHQNPQRIAFSNGRRQKSNQKKKSLNWRMRGFGNETPVLVVKASNGGAGTDVVETAVVDRPKLRRFQVSQGHPSPFGATTRDGGVNFAVYSANAVSVTLCLITLSDLEEDKVTEQLSLDPLTNKTGNVWHVFLKGDFKDTLYGYKFEGKFSPEEGLYYDSSKIVLDPYAKAVIRRGEYGKLSPDGNCWPQMAGTVPSFDDEFDWEGDLPLNYPQKDLIIYEIHVRGFTRHESSMAELPGTYLGLVEKLDHLKELGINCIELMPCHEFNELEYFGYNSVLGDYKVNFWGYSTVNYFSPMIRYSSAGIRNCGRDAINEVKFLIKEAHKRGIEVIMDVVFNHTAEGNENGPILSFRGADNSIYYMLAHKGEFYNYSGCG…
Prupe.1G073100.1.p	-1.10104	0.239945	0.00178155	0.14196	Down	XP_007223754.1	60S ribosomal protein L7-2 [Prunus persica]	86.36	1e-156	sp|Q9LHP1|RL74_ARATH	60S ribosomal protein L7-4 OS=Arabidopsis thaliana GN=RPL7D PE=2 SV=1	At3g13580	434	2e-156	KOG3184	60S ribosomal protein L7	J	Translation, ribosomal structure and biogenesis	K02937|1|2e-178|493|pavi:110758428|large subunit ribosomal protein L7e			GO:0005840//ribosome	MGEEVKAGPVVPESVLKKRKREEQWALAKKQGLESAKKKNSENRKLIYNRAKQYAKEYDEQQKELISLKREAKLKGGFYVNPEAKLLFIVRIRGINAIDPKTKKILQLLRLRQIFNGVFLKVNKATLNMLHRVEPYVTYGYPNLKSVKELIYKRGYGKLNKQRTALTDNSIVEQALGKFGIICVEDLIHEILTVGPHFKEANNFLWPFKLKAPLGGLKKKRNHYVEGGDAGNREDYINELIRRMN
Prupe.1G076300.1.p	-1.37729	0.510187	0.0428053	0.311981	Down	XP_007211696.1	uncharacterized protein LOC18778896 isoform X2 [Prunus persica]	-	-	-	-	-	-	-	-	-	-	-	-	GO:0036503//ERAD pathway		GO:0016021//integral component of membrane;GO:0005783//endoplasmic reticulum;GO:0005886//plasma membrane	MAEEPKTWSSSSQPSSTSKSAEEILQKPQVPPLAGLPSFPNGDFQMLPIMYPLLVPGLNPLQDQEQMNRGAGIYAVPVHPFMGPVTGVSSNTLIPLTYNIPTTRASPEVGTVGEQQGQEGEQQQQQQQRQQQQPAHQRQVVVRRFQIAFQLDVLLIVKLAAVIFLFNQEGSRQRLVVLVIVASIVYLYQTGSLTPLVRWLSQGMHRAAVPPHPPRPVARAGNVPPAARQGVDNAALADGQPGAENENQPADDGNQAVENENVPAADGANGGNRWWGIVKEIQMIVFGFITSLLPGFHNIE
Prupe.1G088200.1.p	10.252	6.67606	2.60926e-05	0.000148222	Up	XP_007227618.1	nicotianamine synthase [Prunus persica]	49.24	1e-95	sp|Q9XGI7|NAS_SOLLC	Nicotianamine synthase OS=Solanum lycopersicum GN=CHLN PE=2 SV=1	-	-	-	-	-	-	-	K05953|1|2e-171|479|fve:101314050|nicotianamine synthase [EC:2.5.1.43]	GO:0030418//nicotianamine biosynthetic process	GO:0030410//nicotianamine synthase activity	-	MASFQISNSETQIPAQLLIARITQLHSSISKLDSLRPSKQVNALFSQLVKLCILPCDIDIMDLSKEAQVMRESLMNLCGRAEGFLELEFATLLVSVPQPLNNLNLFPYYSNYVLLANLEHKILLDNGLVHPHKVAFVGSGPMPLTSMIMATHHMKSTNFDNFDIDEKANDVARKIVASDAELAKRMKFETHDVMKLRERLGEYDCIFLAALVGMKKEEKIKILGHIGKYMKEGSVLLVRSAKGARAFLYPVVEEHDLLGFELLTIFHPNNEVVNSVVLVRKPTF
Prupe.1G102400.1.p	10.4901	7.87778	0.0141465	0.152892	Up	XP_007221878.1	autophagy-related protein 11 [Prunus persica]	66.64	0	sp|Q9SUG7|ATG11_ARATH	Autophagy-related protein 11 OS=Arabidopsis thaliana GN=ATG11 PE=1 SV=1	-	-	-	-	-	-	-	K08330|1|0.0|2378|pper:18789676|autophagy-related protein 11	GO:0006914//autophagy	-	-	MSSTITEGLVNLGKLLVHIAENGHSFELDCEDTTPVEAVMRFIESVVGINLNDQLVLCLDMKLEPHRPLSDYKLPADGREVFIFNKARLQPNSSLPLPEQVDILEIAEPQSPSASHDPHPLDDALDPALKALPSYERQFRYHYHKGHAIYTSTQVKYENCERLWREQKVQERAVEVARGNLDQYYRMINQNYTEFMKRYSQQHRIHSDLLVNLGRDVDKLRSIKLHPALQTASRKCLSDFVKEENLRKAGESCSSSHRQFENKVSQFKQIFGEVKRKVEELFSNRASLPIRNLDLTIKEHQRYITEQKSIMQSLSKDVSTVKKLVDDCLSCQLSSSLRPHDAVSALGPMYDVHDKNHLPRMQACDRAISKLLDFCKDKKNEMNIFVHNYMQKITYISYI…
Prupe.1G106300.1.p	10.6214	8.62555	2.01949e-05	0.000386083	Up	XP_007223307.1	probable receptor-like protein kinase At5g18500 [Prunus persica]	68.13	0	sp|Q8LEB6|Y5185_ARATH	Probable receptor-like protein kinase At5g18500 OS=Arabidopsis thaliana GN=At5g18500 PE=2 SV=1	At1g56720	694	0	KOG1187	Serine/threonine protein kinase	T	Signal transduction mechanisms	K04733|1|0.0|716|oeu:111382865|interleukin-1 receptor-associated kinase 4 [EC:2.7.11.1]	GO:0006468//protein phosphorylation;GO:0007166//cell surface receptor signaling pathway	GO:0004672//protein kinase activity;GO:0004675//transmembrane receptor protein serine/threonine kinase activity;GO:0005524//ATP binding	GO:0016021//integral component of membrane;GO:0005886//plasma membrane	MASGLDTVLAKKTFVFGLRVWVLTGIIVGVFIVMILAVLSVCLTSRKRSRKSNDMLPLSQIPNVSKEIKEIRVDQVSSNNYVPRNSSFLTLSDKFNDRESEKVLIHKNGDSSSRSGSFNNTEKENVGSPSGEEGGAGTAYFRPSSHPITAPSPLSGLPEFSRLGWGHWFTLRDLEFATNRFSKENVIGEGGYGVVYQGNLINGTPVAVKKLLNNLGQAEKEFRVEVEAIGHVRHKNLVRLLGYCIEGTHRLLVYEYVNNGNLEQWLHGAMRHHGYLTWEARMKVLLGTAKALAYLHEAIEPKVVHRDIKSSNILLDDDFNAKISDFGLAKLLGAGKSHITTRVMGTFGYVAPEYANSGLLNEKSDVYSFGVVILEAITGRDPVDYGRPAQEVNLVDWLK…
Prupe.1G111900.1.p	1.99519	0.179317	0.000371254	0.080242	Up	XP_007222525.1	gibberellin 2-beta-dioxygenase 2 [Prunus persica]	55.88	8e-140	sp|Q9XHM5|G2OX2_PEA	Gibberellin 2-beta-dioxygenase 2 OS=Pisum sativum GN=GA2OX2 PE=2 SV=1	At1g02400	357	9e-123	KOG0143	Iron/ascorbate family oxidoreductases	QR	Secondary metabolites biosynthesis, transport and catabolism;General function prediction only	K04125|1|0.0|702|pper:18792061|gibberellin 2beta-dioxygenase [EC:1.14.11.13]		GO:0046872//metal ion binding;GO:0016491//oxidoreductase activity	-	MVAASPNPIHNEKIEAIELPVIDLSAERSQVRNLIVKACEDYGFFKVINHGVPQDIVAKLEEQSLSFFAKTMAEKQRAGPAIPLGYGCKTIGFNGDMGEVEYLLFNTNPISVAQRSKTISNEPTKFSSAVSGYIEAMKDLACEILDLIGEGLWVPDTSVFSRLIRDVENDSFFRLNHYPHHLNKDCTSNINSSCSSKVGFGAHNDPQILTLLRSNDVGGLQISPQDGLWVPAPSDPTAFWVNVGDLLQAMTNGRFVSVRHRALNNSSNSKSRMSMAYFATPPLNACINALPEMVTPEKPRLYKPFTWGEYKSTLYSLRLGDTRLNLFRASTSDELAS
Prupe.1G112900.1.p	2.01489	0.356253	0.00131202	0.14196	Up	XP_020425757.1	uncharacterized protein LOC18788626 isoform X1 [Prunus persica]	46.88	8e-09	sp|B9FHF3|DJB6_ORYSJ	DnaJ protein ERDJ3B OS=Oryza sativa subsp. japonica GN=ERDJ3B PE=1 SV=1	At5g49580	727	0	KOG0720	Molecular chaperone (DnaJ superfamily)	O	Posttranslational modification, protein turnover, chaperones	K09534|1|0.0|1542|pper:18788626|DnaJ homolog subfamily C member 14	-	-	-	MARKGNQQKNGVDRQTSKHKKKGTDSGCTLAETKGQGKASEVKVFPGEELPNGDQPSSPLSASGSKTNHPGDENKSKQKSGKLLRKDKQGMDATWGPEEAMSLGSDSGDCNGNNEAPSTREENGSLPRSDLRRKHTKRKFGSSLKRWHMKTLLSRVEFSDSLLVRNLKASTLSFLKVASEWLQRHEPMFLTVKSNILNARDYVNTKFEQAYPIVLKWLMQFGSILFLLSMAWLDCTVRGIDSLVRMGTTSFFSVIWCSILSVVAMVGMFKFLIVLVFAALIGLFIGFMLSILVVAISGAIFLWFYGSFWTTALVIFLAGLAFTLSHERVALFVATVYSIYCAWTYVGWLGLLIGLNLSFISSDCLIYFLKNNVNQQRRPTGFPEQASGMQGQPGFFNDE…
Prupe.1G122000.1.p	-10.4011	7.43991	0.0170698	0.0337493	Down	XP_007223507.1	DNA-directed RNA polymerases II, IV and V subunit 9A isoform X1 [Prunus persica]	89.47	1e-77	sp|Q6NLH0|RPB9A_ARATH	DNA-directed RNA polymerases II, IV and V subunit 9A OS=Arabidopsis thaliana GN=NRPB9A PE=1 SV=1	At3g16980	224	3e-77	KOG2691	RNA polymerase II subunit 9	K	Transcription	K03017|1|3e-83|242|pmum:103323131|DNA-directed RNA polymerase II subunit RPB9	GO:0006379//mRNA cleavage;GO:0006351//transcription, DNA-templated	GO:0008270//zinc ion binding;GO:0003676//nucleic acid binding;GO:0003899//DNA-directed 5'-3' RNA polymerase activity	GO:0005730//nucleolus	MSTMKFCRECNNILYPKEDKDQKILLYACRNCDHQEVADNNCVYRNEIHHAVGERTQILQDVAADPTLPRTKAVRCSECKHGEAVFFQATARGEEGMTLFFVCCNPSCGHRWRD
Prupe.1G130000.1.p	-1.19347	0.274009	0.00732063	0.185828	Down	XP_007221880.1	phospholipase D zeta 1 [Prunus persica]	73.98	0	sp|Q9LRZ5|PLDZ1_ARATH	Phospholipase D zeta 1 OS=Arabidopsis thaliana GN=PLDZETA1 PE=1 SV=1	At3g05630	1332	0	KOG1329	Phospholipase D1	I	Lipid transport and metabolism	K01115|1|0.0|2309|pper:18789450|phospholipase D1/2 [EC:3.1.4.4]	GO:0006654//phosphatidic acid biosynthetic process;GO:0016042//lipid catabolic process;GO:0048017//inositol lipid-mediated signaling	GO:0035091//phosphatidylinositol binding;GO:0070290//N-acylphosphatidylethanolamine-specific phospholipase D activity;GO:0004630//phospholipase D activity	GO:0005622//intracellular	MESEQLISGSGSRYVQMRSDTATSPSSFLCRLSSFEPARIFEELPSATIVSVSRPDAGDFSPMLLSYTIEFQYKQFKWRLLKKPSHVFYLHFALKKRAFFEEIHEKQEQVKEWLQNLGIGDHTEVVQDDEDADDETVPLHNEESAKNRDVPSSAALPIIRPALGRQQSMSDRSKVAMQGYLNHFLGNMDIVNSREVCKFLEVSMLSFSPEYGPKLKEDYVMVKHLPKIPRDEAFRKCCACRWFSCCNDNWQKVWAVLKPGFLALLADPFDTQPLDIIVFDVLPASDGNGDGRLSLAKEIKERNPLRHTFKVACGNRSINLRVKSSSKVKDWVASINDAGLRPPEGWCHPHRFGSFAPPRGLTEDGSRAQWFIDGRAAFEAIASAIEDAKSEIFICGWWV…
Prupe.1G143600.1.p	-10.3906	7.38493	0.0146876	0.935997	Down	XP_007222440.1	uncharacterized protein LOC18793416 [Prunus persica]	33.33	2e-07	sp|F4JKK0|SUD1_ARATH	Probable E3 ubiquitin ligase SUD1 OS=Arabidopsis thaliana GN=SUD1 PE=1 SV=1	At3g06330	420	6e-145	KOG1609	Protein involved in mRNA turnover and stability	A	RNA processing and modification	K10661|1|7e-11|69.3|boe:106343219|E3 ubiquitin-protein ligase MARCH6 [EC:2.3.2.27]		GO:0008270//zinc ion binding	GO:0016021//integral component of membrane	MQATQAVSNGAAEAPPAQAGPENVKEEATDPGPAGRRPDISLQIPPRPAAFGSSRSGKGLLQSQGSSKGSSLSGGLFRGLSFKKKATLPDGEKSFLLSTDPSKAPESPTIANFASALPWARCTSLPVTPASNLSPSVSTPISARMYNEVHKPHKETVQATVSRSLSVPGRNIVIVRSVSFATRNEQTQTDPSNDQITPVPVEETNDEEIPEEEAVCRICLDVCEEQNTLKMECFCKGALRLVHEECAIKWFSTKGNKKCDVCGKEVQNLPVTLLRVQSSVQRGTRQEHNQQSLRPETISAWQDFVVLVLISTICYFFFLEQLLIGDLKTQAIVIAAPFAFTLGLLASIFSIILAIKEYIWTYAALEFALVAILVHLLYSVLHLMAIYSILIASVLGFGI…
Prupe.1G175200.1.p	10.3979	7.38725	0.00319978	0.000118828	Up	XP_007225436.1	phosphoglucan, water dikinase, chloroplastic [Prunus persica]	66.07	0	sp|Q6ZY51|PWD_ARATH	Phosphoglucan, water dikinase, chloroplastic OS=Arabidopsis thaliana GN=GWD3 PE=1 SV=1	-	-	-	-	-	-	-	K15535|1|0.0|2443|pper:18793876|phosphoglucan, water dikinase [EC:2.7.9.5]		GO:0016301//kinase activity;GO:2001070//starch binding;GO:0005524//ATP binding	-	MDCLHSLHTSASSQLRRHKQFRFLHHQHQCLGSLAVPPFFGHKRNFRPLCHQSNARLIVCSAGVSSAQSIEEEKESKMKSKSKSGNEKVRLNVRLDHQVEFGESVVILGSIKELGSWKKKVPMNWTESGWVCSLEFKGGESVEYKFLTVRADKTVLWEGGDNRVLKLPKGGNFGIVSHWNATGEAVDLLPLEKEEDVGNNGSTIVDTVSTPEVGTSPFVGQWKGNAISFMRSNEHGNREAGRILDTSGLQGLALKLVEGDRNARNWWRKLEVVRDLLVGSSQSEDRLDALINSAIYLKWINTGQIPCFEDGGHHRPNRHAEISRVIFRELERISCRKDTSPQEVLVVRKIHPCLPSFKAEFTASVPLTRIRDIAHRNDIPHDLKQEIKHTIQNKLHRNA…
Prupe.1G176900.1.p	-10.0976	6.02379	2.74109e-05	0.373679	Down	XP_007222225.1	uncharacterized WD repeat-containing protein C2A9.03 isoform X2 [Prunus persica]	24.16	3e-09	sp|Q9M2Z2|WDR5A_ARATH	COMPASS-like H3K4 histone methylase component WDR5A OS=Arabidopsis thaliana GN=WDR5A PE=1 SV=1	ECU09g1660	59.3	3e-09	KOG4532	WD40-like repeat containing protein	R	General function prediction only	K03322|1|3e-10|65.9|mesc:110626292|manganese transport protein!K03841|2|1e-09|64.7|apro:F751_2463|fructose-1,6-bisphosphatase I [EC:3.1.3.11]!K14963|3|8e-09|61.2|ini:109177497|COMPASS component SWD3	-	-	-	MSYQQAYQFDYMGDEGDMSDFVEDVEEENQGGDAGLDEYDMLTKMSDTSSAQARKGKDIQGIPWDRLNITREKYRLTRLEQYRNYENIPASGEAVDKECKQMQKGGNFYEFFHNTRLVKPTILHFQLRNLVWATSKHDVYLMSSYSVMHWSSLSGSLSEVLNFAGHVAPTEKHAGSLLEGFMQTQISTLAVKDNFLVAGGFQGELTCKSLDKQGVSFCTRTTYDDNAITNAVEIYDRLGGGMHFMASNNDCGIREYDMEKFQLLNHFRFPWPVNHTSISPDRRVVAVVGDHVDALLMDSQNGKTIAKVVGHLDYSFASAWHPDGRIFATGNQDKTSRVWDIRNLSSPIAVLKNNLGAARSIRFSSDGQFMVVAEPADFVHIYSTKADYKVRQEIDFFGE…
Prupe.1G180000.1.p	-1.00899	0.119913	3.03065e-05	0.0177368	Down	XP_007222318.1	signal peptide peptidase-like 3 [Prunus persica]	59.6	0	sp|Q9MA44|SIPL5_ARATH	Signal peptide peptidase-like 5 OS=Arabidopsis thaliana GN=SPPL5 PE=2 SV=1	At2g43105	578	0	KOG2442	Uncharacterized conserved protein, contains PA domain	R	General function prediction only	K09597|1|0.0|1084|pper:18790597|signal peptide peptidase-like 2B [EC:3.4.23.-]		GO:0004190//aspartic-type endopeptidase activity	GO:0016021//integral component of membrane	MASGLLRLVLLVSLIALSLARGGNDMVLDTDSTPKTPSCNNPYLMAKVRNWVNGREAETFEGAGAKFGALLPSEKENAVKLPVVISNPLNGCNASSSKLSGAIALSARGDCEFSVKAKVAQSGGAKALVVINDDEGLAKMACPEDSTSLNISIFVVMIPKSNGESLKNSIQDGKKVELLLYSPKRPVVDFSVVFLWLMAVGTIIVASFWSKITAPEKSDERYNELAEKESNTGTAKDDSEDEVMNLSVKGAVCFVITASVFLLLLYFFMSTWFVWVLIVLFCIGGIEGMHNCLLSLILRTWRSGGRKTITLPLLDEVSILSLVVLALCVGFAVFWVVTRRASYSWVGQDVLGICLMITVLQIARLPNIKVATVLLCCAFVYDIFWVFLSPLMFKDSVMV…
Prupe.1G180600.1.p	-10.257	6.73638	0.000603912	0.155985	Down	XP_007225753.1	uncharacterized protein C3orf26 homolog [Prunus persica]	-	-	-	-	Hs16158889	81.3	1e-17	KOG3089	Predicted DEAD-box-containing helicase	R	General function prediction only	-	-	-	-	MASGKAKNLSKLSLRNPKNKGKPLGPNNTKRQKEKKKKQRVNNQNPIEDKATNQNTQNSNNNNSLSNATKAQPASASAQLSFFLDQFQSGNGVKISSLELESVNDKCILDLSESLDQDVTLLGKHVMAAFGPSWKEELCEKHLLNGKIDPGSPAILIISTSALRSIELLRGLRALTKECHAAKLFSKHMKVEEQVSLLKNRVNIASGTPNRIKKLIDIEALGLSRLSVIVLDTHPDVKGYSLFTLPQVRDEFWDLYKSYFHDRLLQGSLRLGLYGPLSSGNELKGKKRSHIE
Prupe.1G181200.1.p	10.236	6.6024	2.63838e-05	0.000118828	Up	XP_007223957.1	ras-related protein RABA5e [Prunus persica]	84.79	1e-130	sp|P19892|RAA5E_ARATH	Ras-related protein RABA5e OS=Arabidopsis thaliana GN=RABA5E PE=2 SV=1	At1g05810	366	2e-130	KOG0087	GTPase Rab11/YPT3, small G protein superfamily	U	Intracellular trafficking, secretion, and vesicular transport	K07904|1|1e-161|449|pper:18789125|Ras-related protein Rab-11A		GO:0003924//GTPase activity;GO:0005525//GTP binding	-	MSSSDEEGSGEEYLFKIVIIGDSAVGKSNLLSRYARNEFNAHSKATIGVEFQTQSMEIDGKEVKAQIWDTAGQERFRAVTSAYYRGAVGALIVYDITRKTTFESVGRWLDELKTHSDTTVAMMLVGNKCDLENIRDVSVEDGKGLAEAEGLFFMETSALDSTNVIKAFELVIQEIYNNVSRKVLNSDTYKAELSVNRVSLVNNGADGSKKSQGYFSCCSG
Prupe.1G201800.1.p	10.3237	7.01616	2.48277e-05	0.152892	Up	XP_007223119.1	protein SLOW WALKER 1 [Prunus persica]	61.93	0	sp|O82266|SWA1_ARATH	Protein SLOW WALKER 1 OS=Arabidopsis thaliana GN=SWA1 PE=2 SV=1	At2g47990	676	0	KOG0310	Conserved WD40 repeat-containing protein	S	Function unknown	K14549|1|0.0|1134|pper:18788196|U3 small nucleolar RNA-associated protein 15	GO:0006364//rRNA processing		GO:0005730//nucleolus	MAEPQISKTYPVKPKHKPKPRTPKQTTESKYWSSFKTKQIPDLISSITSLTFSPTTPHSFAAAHSASLTLYNPQNKFSPTATISSFRDVVSSASFRCDGLLIAASDLSGLVQVFDVKTRTPLRKLRSHTRPARFVKYPVADKLHLVSGGDDAIVKYWDVSGETPICDLLGHKDYVRCGDCSPVSADMFITGSYDHTVKLWDVRVKDSGSVMEVNHGKPVEDVIFLPSGGLVATAGGNSVKIWDLMGGGKMVYSMESHNKTVTSICVGKLGKDGGEEAQQYRILSVALDGYMKVFDYAKMKVTHSMRFPAPLMSVGFSPDCLTRVIGTSNGTIYAGRRKNKEDFEGGSDEELERPLSKYERRQKKLKALSSGDAGGLGPVEEPQVRVLKPTNFRYFHRGQ…
Prupe.1G205400.1.p	1.27501	0.448269	0.0248906	0.261746	Up	XP_007223909.1	endochitinase EP3 [Prunus persica]	72.28	2e-111	sp|Q9M2U5|CHI5_ARATH	Endochitinase EP3 OS=Arabidopsis thaliana GN=EP3 PE=1 SV=1	At3g54420	320	4e-111	KOG4742	Predicted chitinase	R	General function prediction only	K01183|1|1e-171|474|pper:18793571|chitinase [EC:3.2.1.14]	GO:0006032//chitin catabolic process;GO:0005975//carbohydrate metabolic process;GO:0016998//cell wall macromolecule catabolic process	GO:0004568//chitinase activity	-	MASYRLLSLIALVFVAGGALPRNVRAQAPVADVVTQAFFDGIINQAAADCAGKNFYTRQAFLDAVNSYSDFGRFGTADDSKREIAAFFAHVTHETGHFCYIEEINKDTYCDPSFTNYPCNPNKQYYGRGPLQLTWNYNYGAAGNSIGFDGLNSPESVASDPVLAFKTALWFWINNVRPVISQGFGATIRAINGAVECDGKQPALVQARINYYTDYCTQLSVDPGTNLSC
Prupe.1G245200.1.p	10.415	7.47517	2.3303e-05	0.000118828	Up	ONI30336.1	hypothetical protein PRUPE_1G245200 [Prunus persica]	-	-	-	-	-	-	-	-	-	-	-	K10523|1|6e-20|93.6|mtr:MTR_4g009630|speckle-type POZ protein!K07517|2|2e-11|69.3|atr:18427060|Delta3-Delta2-enoyl-CoA isomerase [EC:5.3.3.8]!K01807|3|2e-08|60.1|zma:100285676|ribose 5-phosphate isomerase A [EC:5.3.1.6]!K20535|4|6e-07|54.7|nta:107797610|mitogen-activated protein kinase 1/2 [EC:2.7.11.24]	-	-	-	MLLKLFQLHKMAEKATKLKQRKRKEKQGNEHEGDEKCYLRWNIQMDRSLAEILREERQMGHKGDGGWKSVAYNTAAAILSAQYNIEVSADNIKNRVKTWKRFYAVVSDILSQSGFSWDATKKMITIDEENVWNEYVKSHEDARTFRYKVIANWDDIVDLCGKDRATGEGAETCFEAAEVMTPDSEPNNFVDLGADTQGFENSHIDDVSPNSSCPKKRNQPSSEIRPPKKRGTPNVLADSVAKMASSFEQFINATTQKLDPLEVYNEVNAIPELNPDEQLKACTWFIENEKQFLMLKTLPVERKKGMVLMFISPRA
Prupe.1G246200.1.p	-10.4765	7.83456	2.1044e-05	0.0181744	Down	XP_007222781.1	uncharacterized protein LOC18790126 isoform X1 [Prunus persica]	-	-	-	-	-	-	-	-	-	-	-	K03252|1|4e-12|72.8|mdm:103420349|translation initiation factor 3 subunit C			GO:0016021//integral component of membrane	MGTLSRSAGGRKPNETMRLIVTTFVGVVFGFLIGVSFPTLSLTKLNLSSSLLPNVDLTYNEDQKSDISRQTILNAWSSTRSNNSSTKAQSSNGTGRIWVPSNPRGAERLPPGILAAESDFYLRRLWGKPSEDLTIKPRYLVTFTVGLNQKKNIDAAVKKFSENFTILLFHYDGQTTEWDEFEWSERAIHVSVRKQTKWWYAKRFLHPDIVAPYDYIFIWDEDLGVEHFNAEEYIKLVRKHGLEISQPGLEPNKGLTWQMTKRRGDREVHKQTVEKPGWCTDPHLPPCAAFVEIMAPVFSRSAWRCVWHMIQNDLVHGWGLDFALRKCVEPAHEKIGVVDSQWIVHQTVPSLGSQGEPQNGKAPWQGVRERCRKEWTMFQMRVANAENAYFKAIGVDPSN…
Prupe.1G247100.1.p	-10.0808	5.954	2.7734e-05	1.92121e-05	Down	XP_007222914.1	uncharacterized protein At1g04910 [Prunus persica]	36.32	3e-82	sp|Q8W486|Y1491_ARATH	Uncharacterized protein At1g04910 OS=Arabidopsis thaliana GN=At1g04910 PE=2 SV=1	-	-	-	-	-	-	-	K02941|1|9e-26|116|aof:109849291|large subunit ribosomal protein LP0!K22733|2|1e-18|93.2|gmx:100803123|magnesium transporter	GO:0052325//cell wall pectin biosynthetic process		GO:0016021//integral component of membrane;GO:0005802//trans-Golgi network;GO:0005768//endosome	MTYSPKRAMAELRHSISMGARGTSSPMKRDEDSSPLISDTQPVDDDDGRGRHPYKDRDRPFFSHFQSICPSIGDDANSSRISLVVVIVVALLGLVSILAIVKRVNAPYLCKKDGITLHCPHVKEAPSLWENPYSATTSWKPCAERRLGGFSDLPPENETTGYIFIHAEGGLNQQRIAICNAVAVAKIMNATLILPVLKQDQIWKDQTKFEDIFDVDHFIDYLKDDVRIVRDIPEWFTDKTELFSSIRRTVKNIPKYAPAQFYIDNVLPRIKEKKIMALKPFVDRLGYDNVPQEINRLRCRVNYHALKFLPEIEQMADLLASRMRNRTGSSNPYMALHLRFEKGMVGLSFCDFVGTREEKALMAKYREKEWPRRYKNGTHLWQLALQKRKEGRCPLEPGE…
Prupe.1G250300.1.p	10.7451	9.39817	1.85345e-05	0.0283048	Up	EOY00528.1	RNA polymerases N / 8 kDa subunit [Theobroma cacao]	94.37	8e-46	sp|Q39290|RPAB5_BRANA	DNA-directed RNA polymerases I, II, and III subunit RPABC5 OS=Brassica napus PE=3 SV=1	At1g61700	138	1e-44	KOG3497	DNA-directed RNA polymerase, subunit RPB10	K	Transcription	K03007|1|2e-47|149|tcc:18609497|DNA-directed RNA polymerases I, II, and III subunit RPABC5	GO:0006366//transcription from RNA polymerase II promoter;GO:0006360//transcription from RNA polymerase I promoter;GO:0006351//transcription, DNA-templated;GO:0006383//transcription from RNA polymerase III promoter	GO:0003677//DNA binding;GO:0003899//DNA-directed 5'-3' RNA polymerase activity;GO:0008270//zinc ion binding	GO:0005736//DNA-directed RNA polymerase I complex;GO:0005665//DNA-directed RNA polymerase II, core complex;GO:0005666//DNA-directed RNA polymerase III complex	MIIPVRCFTCGKVIGNKWDTYLDLLQADYTEGDALDALGLVRYCCRRMLMTHVDLIEKLLNYNTLEKSENS
Prupe.1G256000.1.p	-1.19417	0.378281	0.0134591	0.221462	Down	XP_007225283.1	putative potassium transporter 12 [Prunus persica]	76.19	0	sp|O80739|POT12_ARATH	Putative potassium transporter 12 OS=Arabidopsis thaliana GN=POT12 PE=1 SV=2	-	-	-	-	-	-	-	K03549|1|0.0|1722|pper:18789976|KUP system potassium uptake protein		GO:0015079//potassium ion transmembrane transporter activity	GO:0016021//integral component of membrane	MKEEDGIVERSERLVVRSGSGGGSDSRWVDGSEVDSESPPFSMLSENIGREGYGSLRRRLAKKPKRVDSFDVEAMEIAGGGSHHSKDASVWSTLALAFQTLGVVYGDMGTSPLYVFADVFSRVKIESDVDVLGALSIVIYTIALIPLAKYVFVVLKANDNGEGGTFALYSLICRYAKVNLLPNRQPADEHISSFRLKLPTPELKRALRIKETLERRSFLKTLLLLFVLMGTSMVIGDGILTPAISVMSAVSGLQGEVPGFGTTAVVVVSIIILVVLFNIQRFGTGKVGVMFSPILALWFFSLGSIGIYNLVKYDITVLKAFNPAYIYFFFKKNDKEAWLALGGCVLCITGAEAMFADLGHFSVRAIQIAFSFVVFPCLLLAYLGQAAYLMKYPDSASRI…
Prupe.1G260000.1.p	-10.2756	6.81526	2.42106e-05	0.193549	Down	XP_007227708.1	DEAD-box ATP-dependent RNA helicase 22 isoform X1 [Prunus persica]	58.41	0	sp|Q944S1|RH22_ARATH	DEAD-box ATP-dependent RNA helicase 22 OS=Arabidopsis thaliana GN=RH22 PE=2 SV=1	At1g59990	640	0	KOG0333	U5 snRNP-like RNA helicase subunit	A	RNA processing and modification	K12823|1|4e-28|123|aip:107635283|ATP-dependent RNA helicase DDX5/DBP2 [EC:3.6.4.13]!K14809|4|4e-26|117|vra:106777121|ATP-dependent RNA helicase DDX55/SPB4 [EC:3.6.4.13]!K14810|5|6e-22|104|cit:102617323|ATP-dependent RNA helicase DDX56/DBP9 [EC:3.6.4.13]		GO:0005524//ATP binding;GO:0003676//nucleic acid binding	GO:0009507//chloroplast	MILHRSATTMLPLYKLSSSPPKLFSQFRYSYSVVSNSSSSFRISLLWLSHPRRFGTVTTAAYRKEGGDTFFTEESVSWTSLGVSDKVSQALYNAGLGQPSLIQAASIPSILSGKDVVVAAETGSGKTHSFLVPLIDKLCNEQNDSANIASSDQGVSQPRKISLVLCPNVTLSEQVVRMADGLCDENGKPLLSVVSLCGRQGWRVNEPDIIVSTPAALLNNIDPKNFRRTDFIRSVKYVVFDEADMLLSGGYQNKVIRLIHMLRFDEKLLSRSNEQNLPESETSSHFSSEDEDNLQDEDLSEEEGDAVENDDLDEELEAGHVKSTDWRRVRKVYKRSKQYIFVAATLPVNGKRTAGAVLKKMFPEANWVSGNYLHCHNPRLKQRWIEVTFDTQVDELIKA…
Prupe.1G261300.1.p	-1.61771	0.17956	1.83912e-05	0.0144095	Down	XP_007222590.1	uncharacterized protein LOC18793995 [Prunus persica]	-	-	-	-	-	-	-	-	-	-	-	K08472|1|1e-29|124|cam:101495828|mlo protein!K10875|2|4e-22|103|psom:113287916|DNA repair and recombination protein RAD54 and RAD54-like protein [EC:3.6.4.-]!K07541|3|4e-08|59.7|dct:110096644|phosphatidylinositol glycan, class X	-	-	-	MSLFSRTPWLLLLLLCFLGLGLGFGDALKVPLRIKDVLPVLPRQISWPVLNNFHSAVDLLPSFIGSVTADNTSIEWEGACFSGNQARLEFTEGDRDKPNLGGGVLYLKTSEAHSWACMDLYVFATPYRITWDYYFSAREHTLKFDSWEEQAELEYVKQHGVSVFLMPSGMLGTMLSLIDVLPLFSNTAWGQSANIDFLKKHMGATFEKRSQPWQTTINPEDVHSGDFLAVSKIRGRWGGFETLEKWVTGAFAGHTAVCLKDEMGNLWVGESGHENEKGEEIIAVVPWDEWWELALKDSSNPQIALLPLHPELRAKFNSTAAWEYARSMSGKPYGYHNMIFSWIDTMADNYPPPLDTHLVVSVMSMWTRMQPAYAANMWNEALNKRLGTEGLDLYEILTE…
Prupe.1G262700.1.p	-1.08647	0.159606	0.000136816	0.0428782	Down	XP_007222642.1	transcription factor MYB1R1 [Prunus persica]	51.47	2e-59	sp|Q9LVS0|KUA1_ARATH	Transcription factor KUA1 OS=Arabidopsis thaliana GN=KUA1 PE=1 SV=1	At1g49010_1	125	4e-34	KOG0724	Zuotin and related molecular chaperones (DnaJ superfamily), contains DNA-binding domains	O	Posttranslational modification, protein turnover, chaperones	K08869|1|2e-27|117|cre:CHLREDRAFT_165812|aarF domain-containing kinase!K17613|2|1e-12|73.6|mpp:MICPUCDRAFT_55883|calcineurin-binding protein cabin-1	GO:0006355//regulation of transcription, DNA-templated;GO:0006351//transcription, DNA-templated	GO:0008270//zinc ion binding;GO:0003677//DNA binding	GO:0005634//nucleus	MSRTCSQCGNNGHNSRTCTEASGAASAAKNGIMLFGVRVTEGNAFRKSASMNNLSQYEQTLQADSNGDAGYASDDVVHASGHRRERKRGVAWTEEEHRLFLLGLQKVGKGDWRGISRNFVKTRTPTQVASHAQKYFLRRNNHNRRRRRSSLFDITTDTPLTNSLMDEEHIGQQQHQETATALPQPQMNLGRHILGGFPVSTFPMALSPGVLPVSGETSSVDNLTSSIGPNLNLQNDVPQQAKGAPTTLSAKLIRPIPLHPVLPPPSSKMAGLNLNNKYTPSPKRDPTPLSLKLATTSSEEQSPNTTSSHSSAFQGMSSGSDSIISVA
Prupe.1G267700.1.p	-10.2879	6.87526	9.93235e-05	0.214073	Down	XP_007222277.2	protein TWIN LOV 1 [Prunus persica]	66.85	4e-172	sp|O64511|TLOV1_ARATH	Protein TWIN LOV 1 OS=Arabidopsis thaliana GN=TLP1 PE=1 SV=2	Hs4504831	79	3e-15	KOG0501	K+-channel KCNQ	P	Inorganic ion transport and metabolism	K20715|1|7e-65|226|aof:109822415|phototropin [EC:2.7.11.1]	-	-	-	MESELGLIEQSFNSRYSLWVQEALSELPDSFTITDPCLSGHPIVFASKGFLKMLGYSKSEVIGRNGRVFQGPGTCRRSVVEIREAIREERAIQINLLNYRKDGTPFWMLFHMCPVFNKEDGMVTHFVGVQVPISRKPRRSGRNGVNLCEEGSRMNDIFYGSCRKEVCSSVELGRVLPLESAFDDADDRGLEIEESCEASDVEKTRAATAINNILSVLTHYSELTGRLVCGKRCSLSLGLLSSSLNISLGRIKQSFVLTDPHLPDMPIVYASDAFFKLTGYTRHEVLGRNCRFLSGVDTDSSMIYRIKESIQNEKACTVRILNYRKDKSSFWNLLHISPVRNASGKIAYFVGVQMEEGCKNQVGHGLSPEMRQLSAVGAVRIAVRTLSMGAGPSKSEESN…
Prupe.1G268900.1.p	-10.3344	7.10014	6.20345e-05	0.267087	Down	XP_007227721.1	uncharacterized protein LOC18792672 [Prunus persica]	-	-	-	-	-	-	-	-	-	-	-	-			GO:0016021//integral component of membrane	MAMQSGIGFSKILILAGAGYTSTILLKNGKLSDLIGELQSLLNGTGEQSEGDFDAIASQVRRLAAEVRQLGSSRQITVLNGNGSQIGLTSLIMPAATLGALGYGYMWWKGLKFSDLMYVTKRSMTAAVSNLHKHLESVTEAIANTKKHLTQRVQNLDDKLLEQKEISKSILENVGDTKGSIEELYVTVTELQSALTGLDYKLGSISEKQDVSNLGLFYLVNFVEGKQVEMPQQTKLKLTGNPRGRLVTYSETQSLMGLKEIAESLSGTLNKSTDAIVQDDIEGPGMKPRNLLRSVSTKC
Prupe.1G277100.1.p	-10.1337	6.17646	2.67295e-05	0.303105	Down	XP_007225906.1	casparian strip membrane protein 1 [Prunus persica]	60.53	1e-78	sp|C6T4A0|CASP6_SOYBN	CASP-like protein 6 OS=Glycine max PE=2 SV=1	-	-	-	-	-	-	-	-			GO:0016021//integral component of membrane;GO:0005886//plasma membrane	MKAGGAVDATDKEASKPIPIPKVRVSRVLSVLDFTLRVVAALGTLASAIAMGTSRETLPFTAQFVRFRARYKDLPTLTFFVIANSIVCVYLVLSLPLSFVHIIWTAAKNSRIVLIISDTVMMGLLTAGASAAAAIVYLAHYGNSSTNWFAFCRQFNSFCERISGSLIGSFVAITVLVLLIIMSSVAISRR
Prupe.1G288600.1.p	10.3253	7.04276	0.0357109	0.00150967	Up	XP_007223024.1	putative methylesterase 11, chloroplastic [Prunus persica]	62.61	1e-149	sp|F4IE65|MES13_ARATH	Putative methylesterase 13, chloroplastic OS=Arabidopsis thaliana GN=MES13 PE=2 SV=1	-	-	-	-	-	-	-	K13544|1|2e-50|175|thj:104804464|pheophorbidase [EC:3.1.1.82]	-	-	-	MGNSLVCFSPSHKKPNNNNNFNREPSKRSPYSSPFLSSIASTRRSNGSSKKKEMLADDLLLQQQAIEAVLLFQNHQKNASSIPLNRSTSVVYPSPGQQNQSFTKSSSSRQRLRSDAVSFQPLELVDKQDVKTDGLETNHFILVHGGGFGAWCWYKSMTLLEESGFKVDAVDLTGSGVHSFDTNSITSLAQYVKPLTDILEKLGDGKKVILVGHDFGGTCISYVMELFPSKIAKAIFISAAMLASGQSALNLFAQQTGSNDLMRQAQIFLYANGKDQPPTAINLDKKLAEDLLFNQSPAKDVALASVSMRPIPFAPVTEKLSLSGTNYGSVRRFFIVTQEDHAISVPLQETMIELNPPEQVFRLKGSDHAPFFSRPQALHRILVEISQIPPI
Prupe.1G289700.1.p	-10.4838	7.88017	0.000382247	0.164021	Down	XP_007224672.1	cytochrome b5 [Prunus persica]	59.26	1e-54	sp|Q9FDW8|CYB5A_ARATH	Cytochrome b5 isoform A OS=Arabidopsis thaliana GN=CB5-A PE=1 SV=1	At1g26340	167	2e-54	KOG0537	Cytochrome b5	C	Energy production and conversion	K13379|1|4e-28|110|pavi:110750369|reversibly glycosylated polypeptide / UDP-arabinopyranose mutase [EC:2.4.1.- 5.4.99.30]!K10534|2|2e-21|92.8|sbi:8055422|nitrate reductase (NAD(P)H) [EC:1.7.1.1 1.7.1.2 1.7.1.3]		GO:0046872//metal ion binding;GO:0020037//heme binding	GO:0016021//integral component of membrane	MPTLTKLFTMQEVSKQNSKDNCWVVIDGKVYDLTLYLDDHPGGDDVVLAAAGRDATEDFEDAGHSNIAKDLMGAFCIGELDVDTTSPEITSKNQPVDYPQKIKDLTKQYWAVPVAVVGISVVVGFLYLRKK
Prupe.1G291100.1.p	-1.4148	0.305992	0.00170208	0.14196	Down	XP_007226460.1	cytochrome P450 CYP749A22 [Prunus persica]	59.57	0	sp|H2DH17|C7A22_PANGI	Cytochrome P450 CYP749A22 OS=Panax ginseng PE=2 SV=1	At2g26710	382	2e-127	KOG0157	Cytochrome P450 CYP4/CYP19/CYP26 subfamilies	QI	Secondary metabolites biosynthesis, transport and catabolism;Lipid transport and metabolism	K15639|1|0.0|1070|pper:18790364|PHYB activation tagged suppressor 1 [EC:1.14.-.-]		GO:0016705//oxidoreductase activity, acting on paired donors, with incorporation or reduction of molecular oxygen;GO:0004497//monooxygenase activity;GO:0005506//iron ion binding;GO:0020037//heme binding	GO:0016021//integral component of membrane	MTSLGGLVIIVSSFLCLLLVLVLIKILYKLWLAPARLQKLMALQGIKGPPYRLIHGNTKDISNMIKEAMSKPKSLSSSHDILSVVQPHVHSWTKIYGKNYLQWHGSEAQLVITEPELCKEILNNKDKAYPKRVPESFVKKLLGDGLVTTAEGEKWAKMRRLATHAFHGESLKSMIPAMVASAETMLERWKNYEGKEIEVFEEFRFFTSEVISRTAFGSSYIEGQHIFEMLMKLGFLLTKNSFTIRVPGISKLFKTGDEIESEKLEKDVRASILEIVRKREEKVMTGGEDSFGSDFLGLLVKAHHDANDSQRISVDDLIDDCKTFYVAGQETTNSLLAWTVFLLAHHTDWQEETRKEVIQMFGKQTPNPDGIAKLKTMSMVINECLRLYSPVGTLLRKAE…
Prupe.1G305300.1.p	10.2233	6.54909	0.000371101	0.000937488	Up	XP_007222098.1	SUPPRESSOR OF GAMMA RESPONSE 1 [Prunus persica]	58.46	6e-180	sp|Q6NQK2|NAC8_ARATH	SUPPRESSOR OF GAMMA RESPONSE 1 OS=Arabidopsis thaliana GN=SOG1 PE=1 SV=1	-	-	-	-	-	-	-	-	GO:0006355//regulation of transcription, DNA-templated;GO:0006351//transcription, DNA-templated	GO:0003677//DNA binding	GO:0005634//nucleus	MAGPSWLVDKNRIATKIKSASGTCDPERIKWQSNPTRACPNCQYTIDNSDVAQEWPGLPKGVKFDPTDQEIIWHLIAKSGAEDLKSHPFIDEFIITVDDDEGICCSHPHKLPSVKQDGSASHFFHRAIKAYNTGTRKRRKIHDGDGDVRWHKTGRTKPVMLDGVQRGCKKIMVLYMSTVGGGKPKKTNWVMHQYHLGTEEDEKDGEYVISKIYYQQQQVKQADKTDQDIPEGFDLVITEVDPVTPKSVTPEPPRTERKLADFDLGQDTPATSRDPFPQHHAEDEVHPKMDHAEDEVHPEMDHAEDEVHPEIEKPDHYDQHNVENEADEVINNTENNAQEDPKWWDSESQNLLDSQQLVEGLSLCDDLLQSQSPIRTGHENGEPARVKPRLADYAKLGPE…
Prupe.1G313100.1.p	10.2454	6.65096	0.0198445	0.152892	Up	XP_007223432.1	acyl-acyl carrier protein thioesterase ATL3, chloroplastic [Prunus persica]	71.69	2e-87	sp|Q8W583|ALT3_ARATH	Acyl-acyl carrier protein thioesterase ATL3, chloroplastic OS=Arabidopsis thaliana GN=ALT3 PE=2 SV=1	-	-	-	-	-	-	-	-	-	-	-	MLLQLQSLRAFSVADRTHVTLPSSRVIRTSLHLHRPSISCPTTRPRLRSLPTVRSCTALAFDFKGGKGMSEFLDVELKVRDYELDQYGVVNNAVYASYCQHGRHELLERVGISADAVARTGDALALSELSLKFLAPLRSGDKFVIKVRLSGSSAARLYFDHFIFKLPNQEPILEAKATAVWLDKSYRPVRIPPEVKSKFVQFLRHEES
Prupe.1G314000.1.p	-9.98738	5.58027	2.96024e-05	0.0335146	Down	XP_020418332.1	zinc finger protein GIS3 [Prunus persica]	47.79	4e-56	sp|Q9C9H1|GIS3_ARATH	Zinc finger protein GIS3 OS=Arabidopsis thaliana GN=GIS3 PE=1 SV=1	-	-	-	-	-	-	-	K10773|1|9e-15|78.6|egu:105039152|endonuclease III [EC:4.2.99.18]		GO:0003676//nucleic acid binding	-	MHNSPYIPISFSLSLSLSLSLSSAPLITSIEFPSFFLCFLSVSVPVSKKTSNMAEAAELHYQPKPTNTTNPTSSSNNPTTRLKLFGFNVQDDDLESSVLDSTKTSTPSGSPESGGFSTTGDRKYECQYCCREFANSQALGGHQNAHKKERQQLKRAQLQASRNAAVSYARNPIISAFAPPPHLLAPAGSVMVPAAAPASPSWVYVPRAATPFHVSHGCVFPAAANHGRGAGSYSYGGSIADSTLTSSMGPHHQVLQQGRAHGRADGPSLSRFTKGDGGPSFDDALGLDLHLSL
Prupe.1G328600.1.p	4.21453	1.20127	0.0247079	0.261746	Up	XP_007226522.1	MLP-like protein 31 [Prunus persica]	58.39	9e-60	sp|Q941R6|MLP31_ARATH	MLP-like protein 31 OS=Arabidopsis thaliana GN=MLP31 PE=2 SV=2	-	-	-	-	-	-	-	-	GO:0006952//defense response;GO:0009607//response to biotic stimulus	-	-	MSYAGKVDTDVEIKAPAVKFHEFFSQRPHHLSSISSDKIKGCDLHDGDWGKVGSVVNWNYVHDGKAKVAKVVFDAIDDEKNSITLRVVEGNLLEHYKSFKITVQATPKGEGSVVHWTFEYEKVHGDVTDPHTLLQLAVDLTTDIGAHLTA
Prupe.1G333800.1.p	1.50798	0.614652	0.0438884	0.313289	Up	XP_020415383.1	pentatricopeptide repeat-containing protein At2g01740 [Prunus persica]	56.72	0	sp|Q9ZUA2|PP141_ARATH	Pentatricopeptide repeat-containing protein At2g01740 OS=Arabidopsis thaliana GN=At2g01740 PE=3 SV=1	At2g01740	659	0	KOG4197	FOG: PPR repeat	R	General function prediction only	K17964|1|0.0|1853|pper:18788526|leucine-rich PPR motif-containing protein, mitochondrial!K17710|3|0.0|794|zju:107429247|pentatricopeptide repeat domain-containing protein 1	-	-	-	MIRETLQLIGHLRRTSQLPSHSTCNKLLHNLISSNCGELSLKILSHLVSKGYNPHRSSFNSVISFLCKLGHISFARKLINSMPRYGCLPDIVTYNSLMDGYCKFSDIDEACLLMKEIRMRGCRPDLVTFNVLLNGFCNVKMKKEALVYIGLMWKSCSPNVVTYSHFIDMFCKMEDFGLGYRLLGDMVEGWGAAEFLPLLLFDDGYCKAGNWEVAFELLEKMRHSSLLPNVVTYNALIKGICIKGMLGRADYLFSKMWEDGFEPNSAVYTSMIDGHLKKGNLDDAVKYMSKMHDQGFSLDVAAYGAVISGLCKNGRLDKVMQFIEDMVGSGLAPDQMLLTTIMDAYFKANLKAASGVYGELLVTLQFFALLQRTSQFPTPFTCNKLLHSLISSNCGELSV…
Prupe.1G334600.1.p	-10.3196	7.02794	8.51085e-05	0.0566483	Down	XP_007225261.2	probable RNA-dependent RNA polymerase 1 [Prunus persica]	63.36	0	sp|Q9LQV2|RDR1_ARATH	RNA-dependent RNA polymerase 1 OS=Arabidopsis thaliana GN=RDR1 PE=2 SV=1	At1g14790	1409	0	KOG0988	RNA-directed RNA polymerase QDE-1 required for posttranscriptional gene silencing and RNA interference	A	RNA processing and modification	K11699|1|0.0|2340|pper:18791346|RNA-dependent RNA polymerase [EC:2.7.7.48]	-	-	-	MVKTIQLYGFPSGLSAEAVSEFLEPITGKESVYAVKLREAQNKRMYYAIVQFAKSNDAEDIISLANNKALRYGRSYLNARKMERDIVPRPRTFLHRLDDIGLHFGCKIADEKLHVLWTANDVSVDFGIKLRKFIFLLKYHDLEYKLQLSYENIYKIEVHSPRGRAAAKYLLIQLCGAPRIYKNDVRCSGEVYENPFLNYFRDTPDDQWVRTTDFTPPRAIGQSFTLCLELPYGLKLPDFQENFPEYKETQGEYILESGSSYSCNPDLGAMVCPPPGVDVPYDILFKVNSLVQQGYLPGPALDLTFFRLLDPRRMNMNLACIEFALEKLFHLKESCSEPSVWLKEQYRKYLTSKKPPLSPIISLDSGLVYVRRVQITPCQVYCCGPEVNVSNRVLRNYPG…
Prupe.1G337600.1.p	-2.55905	0.52433	0.00179237	0.14196	Down	XP_007222576.1	purple acid phosphatase 3 [Prunus persica]	69.68	3e-164	sp|Q8H129|PPA3_ARATH	Purple acid phosphatase 3 OS=Arabidopsis thaliana GN=PAP3 PE=2 SV=1	At1g14700	462	6e-164	KOG2679	Purple (tartrate-resistant) acid phosphatase	O	Posttranslational modification, protein turnover, chaperones	K14379|1|0.0|692|pper:18788906|tartrate-resistant acid phosphatase type 5 [EC:3.1.3.2]		GO:0003993//acid phosphatase activity	-	MEMKTRTIASVLISVLVVCSLSCAAELLRRFQHAPKADGSLSFLVLGDWGRRGAFNQSQVALQMGIIGEKLDIDFVISTGDNFYDNGLTGIDDPNFEDSFTKIYTAPSLQKQWYNVLGNHDYRGDVEAQLSPVLRELDAKWLCLRSFIVDTEIAELFFVDTTPFVDKYFTHPEDAVYDWSGILPRNHYLSNLLNDLDSALKESTAKWKIVIGHHTIRSAGYHGETKELVTQLLPILLENNVDLYMNGHDHCLEHISSPDSPLQFVTSGGGSKAWKGEASLYNPSEMKLYYDGQGFMSVQITERQVDIAFYDIFGNVLHKWATSNQLYPTITM
Prupe.1G353200.1.p	10.4007	7.40153	0.00453531	0.00486362	Up	XP_007222963.2	WAT1-related protein At4g19185 [Prunus persica]	72.61	0	sp|Q8W4R9|WTR35_ARATH	WAT1-related protein At4g19185 OS=Arabidopsis thaliana GN=At4g19185 PE=2 SV=1	-	-	-	-	-	-	-	K17500|1|3e-68|231|nta:107765414|integrin-linked kinase-associated serine/threonine phosphatase 2C [EC:3.1.3.16]	-	-	-	MAAVSMAGAGVIGVGGGDVWRAHAAMAVVQLFNGGYHVITKVALNVGINQLVFCVFRDLLALAILAPIAYVREKRIRQPMNRRLFMSFFFLGLSGIFGNQLLFLIGLGYTNPTYAAAIQPAIPVFTFILAVLMGTERVNLLRTEGQAKVGGTLVCVFGAILMVLFRGPVLIGYIEPDFAAQNEISARGQPEPAGWLMSSFLQFGLDHFHLGVLCLLGNCMCMAAFLAIQAPLLKRYPANLSVTAYSYFFGALLMVVTALFMTNESTDWSLTQSELFAVIYAGTVASALNYGLLTWSNKILGPALVALYNPLQPAASAFLSRIFLGSPIYLGSVLGGLLIIAGLYVVTWASLRERQAAPDVMPHVARASEPLIHKDATINKIPYQRGLIFSGPSNSLPKS…
Prupe.1G361300.1.p	-1.5122	0.37449	0.00374603	0.163788	Down	XP_020420898.1	CO(2)-response secreted protease [Prunus persica]	59.08	0	sp|Q9LNU1|CRSP_ARATH	CO(2)-response secreted protease OS=Arabidopsis thaliana GN=CRSP PE=2 SV=1	SPAC4A8.04	52	2e-06	KOG1153	Subtilisin-related protease/Vacuolar protease B	O	Posttranslational modification, protein turnover, chaperones	K15333|1|3e-89|313|nsy:104224633|tRNA guanosine-2'-O-methyltransferase [EC:2.1.1.34]!K12619|2|2e-33|143|ghi:107940264|5'-3' exoribonuclease 2 [EC:3.1.13.-]!K13199|3|1e-19|98.2|mtr:MTR_7g081660|plasminogen activator inhibitor 1 RNA-binding protein!K14568|4|4e-15|84.3|dct:110101229|rRNA small subunit pseudouridine methyltransferase Nep1 [EC:2.1.1.260]	-	-	-	MGMKSISVFLSFPFLFLLTFISFHAQTKADENRVYIVYMGSAASSSPRSKNSLRNDHALLLKSVLRRKANAVVHTYRHGFSGFAARLSEEEARSIAHKPGVVSVFPDPLLKLHTTQSWEFLKYQTALEIYSNPNSISGAANGFSSVSANGSDTIIGILDTGIWPESESFNDKDMGPIPSRWKGTCMKSDDFSSSNCNRKLIGARFYDTSESDDTETEDGSPRDSEGHGSHVAATAAGSIVQGASYYGVAAGTAKGGSPTSRIAVYKVCSSEGCLGSAILAAFDDAIADGVDVLSLSLGSPIEYEPELSSDPIAIGAFHAVEQGITVVCSAGNDGPSRETVVNAAPWIVTVAATTIDRDFESDVVLGGNKTIKGRGINFSELQKSPVHPLIYAGSAGEGD…
Prupe.1G369400.1.p	-10.3716	7.28493	2.26411e-05	1.86966e-05	Down	XP_007222527.1	protein BASIC PENTACYSTEINE6 [Prunus persica]	67.51	8e-157	sp|Q8L999|BPC6_ARATH	Protein BASIC PENTACYSTEINE6 OS=Arabidopsis thaliana GN=BPC6 PE=1 SV=1	-	-	-	-	-	-	-	K08835|1|2e-37|146|ppp:112289801|serine/threonine-protein kinase OSR1/STK39 [EC:2.7.11.1]	-	-	-	MDDSGHRENGRIKAEQYKAAQGQWLMQHQPSMKQIMAIMGERDAAIQERNLAFSEKKAALQERDMAFLQRDAAIAERNTAIMERDNAIANLQYRENSLNNGNVSSCPPGCQISRGVKHMHHPQQHVHHPPHMNEASYGTRDMHTSDSVPMPPDASLPTKSRQPKRPREPKTMAPNKKTSKSPRKVKRESEDLNKMTFDKLHEWKGSQDMGGGGDDVNKHLVVSKSDWKCQDLGLNQVAYDESTMPAPVCSCTGILRQCYKWGNGGWQSSCCTTTMSMYPLPAVPNKRHARVGGRKMSGSAFNKLLSRLAAEGHDLSNPVDLKDNWAKHGTNRYITIK
Prupe.1G372600.1.p	10.2516	6.67413	2.61002e-05	0.0837025	Up	XP_007222182.1	uncharacterized protein LOC18789805 [Prunus persica]	-	-	-	-	At1g75460	357	1e-124	KOG4159	Predicted E3 ubiquitin ligase	O	Posttranslational modification, protein turnover, chaperones	-	-	-	-	MALPQLIPSSSSSLHHKPIFNPNPIPSPLNPNPNFLSPRLRRSHHHRRQRPGSLKCSASSFSERHPTNQPKSDDVVELPLFPLPLVLFPGAILPLQIFEFRYRMMMHSLLQTDLRFGVIYSDAVSGTSDVGCVGEIVKHERLVDDRFFLICKGQERFRVTDLVRTKPYLVAEVKWLEDRPSNDGDEDLEALANEVESYMKDVIRLSNRLGGKPEKDVQDLRRNLFPTPFSFFVGSTFEGAPREQQALLELEDTAARLKREKETLRNTLNYLTAASAVKDVFPST
Prupe.1G375100.1.p	-10.2656	6.78454	0.00118527	0.532446	Down	XP_007225692.1	bifunctional nuclease 1 [Prunus persica]	70.64	1e-168	sp|Q9FWS6|BBD1_ARATH	Bifunctional nuclease 1 OS=Arabidopsis thaliana GN=BBD1 PE=2 SV=1	-	-	-	-	-	-	-	K08999|1|2e-40|148|jcu:105628516|uncharacterized protein		GO:0004518//nuclease activity	-	MVSLQGPVICPTVRAKQSGYDTVPVVGPLVKARLLRSELCRFRGVSGCITKAGFVSRPQNARKCTRVHCTFSSSSNGNGSMAENFNENDEDYVNSSVLEAVEVKSGIDGFMIKMRDGRHMRCVHNNPQGGHLPDYAPHPAIVLKMEDGTGLLLPIIVLEMPSVLLMAAVRNVPIARPTMYQVVREMIDKMGYEVRLVRVTKRVHEAYFAQLYLRKAGSETECVSFDLRPSDAINIAVRCKVPIQVNKYLAYSDGMRVIESGKLSSHGPASDGLLFTELDRPSGQPCVETKEFNLVRNMLIAAVEERYRDAAQWRDKLLQLRARRNLA
Prupe.1G401000.1.p	10.1124	6.06225	0.014361	0.000118828	Up	XP_007223115.2	ubiquitin carboxyl-terminal hydrolase 18 [Prunus persica]	63.34	0	sp|Q67XW5|UBP18_ARATH	Ubiquitin carboxyl-terminal hydrolase 18 OS=Arabidopsis thaliana GN=UBP18 PE=2 SV=2	At4g31670	674	0	KOG1865	Ubiquitin carboxyl-terminal hydrolase	O	Posttranslational modification, protein turnover, chaperones	K11855|1|0.0|1459|pper:18790652|ubiquitin carboxyl-terminal hydrolase 36/42 [EC:3.4.19.12]	-	-	-	MHVAGVSLDLNWFLQFIFTAFIIAFGLLHFVKNTASKYFEVDANFEGGDHSDRTQMPGALMEDPVCAVCGNSGPKKCSRCKAVRYCSQKCQEKHWKSGHKTECKNTLSNSRFKTSGGGGKTFSGLALVPIRGISKHIKKPKEILFPYDEFVQLFNWDKLRFPPCGLLNCGNSCFANVVLQCLSSTRPLVAYLLEKGHRRECICEDWCFLCEFQTHLERASQSSQAFSPTNIISRLPNIGGNLVHGRQEDAHELMRFAIDTMQSVCLSEFGGEKAVHPSTQETTIIQHIFGGLLQSQVICTKCKNISNRYDNMMDLTVEIHGDASSLEECLDQFTIKEWLDGENKYKCDGCNDYVKAWKRLTVKRAPNILTIALKRFQSGRFGKINKRVTFPETLDLNPY…
Prupe.1G403700.1.p	-1.11277	0.358768	0.0361633	0.294827	Down	XP_020409698.1	copper-transporting ATPase PAA2, chloroplastic [Prunus persica]	75.31	0	sp|B9DFX7|HMA8_ARATH	Copper-transporting ATPase PAA2, chloroplastic OS=Arabidopsis thaliana GN=PAA2 PE=2 SV=1	At4g33520	605	0	KOG0207	Cation transport ATPase	P	Inorganic ion transport and metabolism	K01533|1|0.0|1805|pper:18791761|Cu2+-exporting ATPase [EC:3.6.3.4]	GO:0030001//metal ion transport	GO:0046872//metal ion binding;GO:0019829//cation-transporting ATPase activity;GO:0000166//nucleotide binding	GO:0016021//integral component of membrane	MVNGMLRLALSPDPKLLFSYSSSSNVDRFAFNFKPHLPQRRRSNLFLQPRSNSNFTLSSSLQASANTAALQQVQQEPRAAETSVLLDVSGMMCGGCVSRVKSVLSADERVDSVAVNMLTETAAIKLRPEVAADGVETVAESLAGRLTECGFASKRRASGMGVTESVRKWKETMKKKEEMLVKSRNRVIFAWTLVALCCGSHASHILHSLGIHVAHGSFWEVLHNSYAKAGLASGALLGPGRDLLFDGLRALKKGSPNMNSLVGFGSLAAFTISAVSLLNPGLQWDASFFDEPVMLLGFVLLGRSLEERARIRASSDMNELLSLINTQSRLVIASSENDSSADSVLCADAICVEVPTDDIRVGDSVLVLPGETIPVDGRVLAGRSVVDESMLTGESLPVF…
Prupe.1G407300.1.p	1.53853	0.432289	0.00741133	0.186093	Up	XP_020415185.1	17.1 kDa class II heat shock protein [Prunus persica]	78.62	8e-83	sp|P05477|HSP21_SOYBN	17.9 kDa class II heat shock protein OS=Glycine max GN=HSP17.9-D PE=3 SV=1	At5g12020	175	8e-57	KOG0710	Molecular chaperone (small heat-shock protein Hsp26/Hsp42)	O	Posttranslational modification, protein turnover, chaperones	K13993|1|1e-111|317|pper:18793718|HSP20 family protein	GO:0009408//response to heat	-	-	MDVRIAGLDSPLFSTLQHIMDFTDEPDKSFNAPTRTYVRDAKAMASTPADVKEYPNSYVFVVDMPGLKSGDIKVQVEDDNVLLITGERKREEEKEGAKYVRMERRVGKFMRKFVLPENANVEAISAVCQDGVLTVTVEKLPPPEPKKPKTIEVKIA
Prupe.1G407600.1.p	-10.4537	7.71166	2.13813e-05	6.52788e-05	Down	XP_020409572.1	protein PLASTID MOVEMENT IMPAIRED 1-RELATED 1 [Prunus persica]	38.73	0	sp|F4K5K6|PMIR1_ARATH	Protein PLASTID MOVEMENT IMPAIRED 1-RELATED 1 OS=Arabidopsis thaliana GN=PMIR1 PE=2 SV=1	-	-	-	-	-	-	-	K15176|1|0.0|714|cmax:111484869|RNA polymerase-associated protein CTR9	-	-	-	MMLRKTESVSNSSAGNSNHGQLLRDLEEISKALYLHKPPPKVLLSPSNARSKSAGKTRFPESKSNLNSNPRLLREDLLHKDKKSSSVWNWKKPLKALTHIGNRKFSCCFYLHVHSIEGWPENFNNLSVCVHWKRKDEVVETRSSRVVEGIAEFDETLMHKCSVYGSRNGPNHSVKYEEKLFLIYVSLSGAPGLDIGKHWVDLTRLLPLTFEELEGEKSYGKWTTSFNLSGKAKGASLNVSLGFLVTRDKSVGVSVNPNIPELINTEQRRSSSLDSGATMLRRVGSVPSSVSPRPAFSSQSLDLKVCREVLLTGGLELSKSINFLCQALDEANLSSATESDAEHVSPLKPKPDLDLLAAEKNEEYEDDDTEFNIVEVGTEMCEQLKSDQVPGHANDESAV…
Prupe.1G407800.1.p	-10.3041	6.95358	0.0124634	0.389148	Down	ONI33135.1	hypothetical protein PRUPE_1G407800 [Prunus persica]	56.67	6e-35	sp|Q9SMZ9|Y4331_ARATH	Uncharacterized protein At4g33100 OS=Arabidopsis thaliana GN=At4g33100 PE=3 SV=1	At4g33100	115	1e-34	KOG3481	Uncharacterized conserved protein	S	Function unknown	K17968|1|2e-72|216|pper:18788717|TRIAP1/MDM35 family protein	-	-	-	MGILTDSQNKRSPSSSSTSPCANLRAAYHNCFSRWYSEKFVKGQWDKEECVSEWQKYKACLSQHLEDKQLSRFLEAEGPVSSTIEVASSRTTKTDDAPTGSSQ
Prupe.1G410600.1.p	-1.01867	0.242897	0.00854008	0.192551	Down	XP_007222761.1	probable ADP,ATP carrier protein At5g56450 [Prunus persica]	72.7	3e-180	sp|Q9FM86|ADT5_ARATH	Probable ADP,ATP carrier protein At5g56450 OS=Arabidopsis thaliana GN=At5g56450 PE=2 SV=1	At5g56450	501	6e-180	KOG0749	Mitochondrial ADP/ATP carrier proteins	C	Energy production and conversion	K05863|1|0.0|660|pper:18789754|solute carrier family 25 (mitochondrial adenine nucleotide translocator), member 4/5/6/31	GO:0055085//transmembrane transport	GO:0005215//transporter activity	GO:0016021//integral component of membrane;GO:0005743//mitochondrial inner membrane	MSKDDDDPKSRGSISRPHDWLNNFQRDLMAGAVMGGVVHTIVAPIERAKLLLQTQESNLAILGGGRTRFKGMVDCIVRTVREEGILSLWRGNGSSVLRYYPSVALNFSLKDLYRNVLRSGHSHDGHFLSGPSANFIAGAAAGCTTLIIIYPLDISHTRLAADIGRTEVRQFRGIYHFLSTIRQKDGIRGVYRGLPASLQGMVIHRGLYFGGFDTIKEILSEKSELELPLWKRWAVAQAVTTSAGLLSYPLDTVRRRMMMQSGLEQRMYHNTLDCWRKIYRTEGVTSFYRGAVSNMFRSTGAAAILVLYDEVKKFMNWGGL
Prupe.1G413500.1.p	-10.2765	6.82807	0.000609144	0.810179	Down	XP_007225598.2	abscisic acid receptor PYL2 [Prunus persica]	69.27	8e-90	sp|O80992|PYL2_ARATH	Abscisic acid receptor PYL2 OS=Arabidopsis thaliana GN=PYL2 PE=1 SV=1	-	-	-	-	-	-	-	K14496|1|1e-147|411|pper:18790573|abscisic acid receptor PYR/PYL family	-	-	-	MDASRAPPYGLTQEEFAEVESLIKTYHKFEPSPNTCTSLIAQKIDAPASHVWPLVRSFDNPQKYKHFIKSCNMKGDGGVGSIREVTVVSGLPASTSTERLEILDDEKHIISFRVVGGEHRLNNYRSVTSVTEFVDGRDGVSDQVYSIVLESYIVDIPEGNTGEDTKMFVDTVIKLNLQKLGVVAMNSAHGIGGQEIEES
Prupe.1G424300.1.p	10.4122	7.46079	0.00121518	0.000118828	Up	XP_007222874.1	zinc finger protein ZAT10 [Prunus persica]	47.15	7e-62	sp|Q96289|ZAT10_ARATH	Zinc finger protein ZAT10 OS=Arabidopsis thaliana GN=ZAT10 PE=2 SV=1	At1g27730	194	1e-61	KOG1721	FOG: Zn-finger	R	General function prediction only	K22534|1|1e-11|68.9|fve:101303190|PR domain zinc finger protein 5		GO:0003676//nucleic acid binding	-	MALQALNSPTTAGASPFRFEEAASKINYVEPWTKRKRSKRPRLDSPSTEEEYLALCLIMLARGGSGSTSAATTATNSAASHHMITQSPSNASHQEPSTSAQPPKLSYKCSVCNKAFPSYQALGGHKASHRKGAAGSAAEGPSTSSNTTTSGTTTVTASGRTHECSICHKSFPTGQALGGHKRCHYEGGVGASTATATATTTSAVTSSEGVGSTSHQAVSHGHRETFDLNMPALPEFSRDFFLCGEDEVESPHPAKKPRILTIMKPKQEISQN
Prupe.1G429800.1.p	-10.1882	6.41538	0.00859502	0.0552812	Down	XP_007227378.1	putative receptor protein kinase ZmPK1 [Prunus persica]	39.88	0	sp|P17801|KPRO_MAIZE	Putative receptor protein kinase ZmPK1 OS=Zea mays GN=PK1 PE=2 SV=2	At5g38560	231	3e-65	KOG1187	Serine/threonine protein kinase	T	Signal transduction mechanisms	K04733|1|0.0|1598|pavi:110761926|interleukin-1 receptor-associated kinase 4 [EC:2.7.11.1]	GO:0048544//recognition of pollen	GO:0004674//protein serine/threonine kinase activity;GO:0005524//ATP binding	-	MDAYMVFLFLLLTLFSQLGSSASYSTMSMGSSLSVENPADILISPNGMFSAGFFQVGENAYCFAIWFTEPSPTHNLTVVWMANRDEPVNGRSSKLTLQKNGNLILTDAGKSTIWSSNTVSASLAQLRLNDTGNLVLLTVKGVALWESFASPTDTLLPHQPLTRNTKLLSSRSLTNYSSGFYSLFFDNDNTLRLLYDGPEVSSIYWPDPWLLSIQAGRSTYNNSRIAKFDNLGNFSASDDFTILSSDYGAKRQRIVKMDADGNVRMYSRKQPGDTWVVTWEAVLQPCKIHGICGANSWCNYVPSFGRKCSCVPGYVIRNKNDWIYGCQPEFNLSHNNSIAARDQFDFMFIPRVEIYGFDFGIFYNYTWEKCKNFCLDLGNCTGFHFKYDSGGGGFYNCFP…
Prupe.1G433000.1.p	-10.3204	7.03105	0.00483858	0.627621	Down	XP_021820184.1	uncharacterized protein LOC110761908 [Prunus avium]	62.02	0	sp|Q3EDL4|Y1154_ARATH	Probable serine/threonine-protein kinase At1g01540 OS=Arabidopsis thaliana GN=At1g01540 PE=1 SV=2	At4g02630	656	0	KOG1187	Serine/threonine protein kinase	T	Signal transduction mechanisms	K04733|1|0.0|1080|pavi:110761908|interleukin-1 receptor-associated kinase 4 [EC:2.7.11.1]	-	-	-	MSGYSFLNDQLSKRTSIFGLHLWVVLGICVGAAIVLVLFLISLWFTSRRNSSSSKAKTFNQNSTIPNVSKEIQEIRIDHARNPVPDPNPIQHQNHPDPVADSEPLARAQALLLQPEDHESPAGGGGRQRIHIEIGKDHRISYPEKGGGSSHGSGEARSGDQGLMAVPEVSHLGWGHWYTLRELEDATNGFADENVIGEGGYGIVYRGIFEDNHMVAVKNLLNNKGQAEKEFKVEVEAIGRVRHKNLVRLLGYCAEGAHRMLVYEYVDNGNLEQWLHGDVGPTSPLTWEIRMNIILGTAKGLTYLHEGLEPKVVHRDIKSSNILLDKQWNSKVSDFGLAKLLGSERSYVTTRVMGTFGYVAPEYASTGMLNERSDVYSFGILIMEIISGRNPVDYSRPQG…
Prupe.1G461600.1.p	10.1624	6.27343	2.77674e-05	0.000851641	Up	XP_020410248.1	flowering-promoting factor 1 [Prunus persica]	78.7	2e-58	sp|O23624|FPF1_ARATH	Flowering-promoting factor 1 OS=Arabidopsis thaliana GN=FPF1 PE=2 SV=1	-	-	-	-	-	-	-	K14416|1|3e-47|164|aly:ARALYDRAFT_325603|elongation factor 1 alpha-like protein	-	-	-	MSGVWVFKNGVIRLVENPQAETSSRKKALVHLPSGQVVSSYSTLEQILTGLGWERYYGGDPDLFQFHKRSSIDLISLPRDFSKFNSVYMYDIVIKNPNIFHVRDM
Prupe.1G472200.1.p	-1.08293	0.171643	0.000230495	0.0680639	Down	XP_008219889.1	PREDICTED: histone H2A variant 1-like [Prunus mume]	84.67	3e-76	sp|Q84MP7|H2AV3_ORYSJ	Probable histone H2A variant 3 OS=Oryza sativa subsp. japonica GN=Os03g0743400 PE=2 SV=1	At3g54560	222	8e-76	KOG1757	Histone 2A	B	Chromatin structure and dynamics	K11251|1|4e-93|269|pavi:110769103|histone H2A	GO:0006342//chromatin silencing	GO:0003677//DNA binding;GO:0046982//protein heterodimerization activity	GO:0005634//nucleus;GO:0000786//nucleosome;GO:0000790//nuclear chromatin	MSGKGAKGLIMGKSPAINKDKDKDKKKPISRSSRAGLQFPVGRIHRLLKSRVSANGRVGATAAVYSAAILEYLTAEVLELAGNASKDLKVKRITPRHLQLAIRGDEELDTLIKGTIAGGGVIPHIHKSLINKSTKD
Prupe.1G472700.1.p	1.3653	0.329645	0.0032456	0.163788	Up	XP_007225830.1	cytochrome b-c1 complex subunit 7-2 [Prunus persica]	88.52	3e-75	sp|F4JWS8|QCR72_ARATH	Cytochrome b-c1 complex subunit 7-2 OS=Arabidopsis thaliana GN=QCR7-2 PE=1 SV=1	At5g25450	218	6e-75	KOG3440	Ubiquinol cytochrome c reductase, subunit QCR7	C	Energy production and conversion	K00417|1|2e-85|248|pavi:110769121|ubiquinol-cytochrome c reductase subunit 7	GO:1902600//hydrogen ion transmembrane transport;GO:0009060//aerobic respiration;GO:0006122//mitochondrial electron transport, ubiquinol to cytochrome c;GO:0034551//mitochondrial respiratory chain complex III assembly		GO:0005750//mitochondrial respiratory chain complex III	MASFLQSLVDPRKNWFARQHMKAVSQRLRHYGLRYDDLYDPYYDLDIKEALNRLPREIVDARNQRLKRAMDLSMKHEYLPEHLQAQQTPFRSYLQEMLALVKREKAEREALGALPLYQRTIP
Prupe.1G473400.1.p	1.01429	0.265742	0.00511269	0.169711	Up	XP_007223593.1	cytochrome c oxidase subunit 5b-2, mitochondrial [Prunus persica]	60.74	2e-61	sp|Q9SSB8|CX5B2_ARATH	Cytochrome c oxidase subunit 5b-2, mitochondrial OS=Arabidopsis thaliana GN=COX5B-2 PE=1 SV=1	At1g80230	187	4e-61	KOG3352	Cytochrome c oxidase, subunit Vb/COX4	C	Energy production and conversion	K02265|1|2e-122|345|pper:18791693|cytochrome c oxidase subunit 5b		GO:0004129//cytochrome-c oxidase activity	GO:0005740//mitochondrial envelope	MWRRVASSSSAQLQALASASCRSSSLNLTRRFLISSASSPSSTPLPSSPPPSSPHTTGASSSALKKKVEDVMPIATGHEREELAAELEGRNVLEINYPVGPFGTKEAPAIIKSYYDKRIVGCPGIEGGEDEHDVVWFWLEKGKPHECPVCTQYFKLEVVGPGGPPDGHH
Prupe.1G485300.1.p	-1.01165	0.205065	0.0011447	0.14196	Down	XP_007223638.1	40S ribosomal protein S11 [Prunus persica]	90.57	6e-97	sp|P17093|RS11_SOYBN	40S ribosomal protein S11 OS=Glycine max GN=RPS11 PE=2 SV=2	At5g23740	275	6e-96	KOG1728	40S ribosomal protein S11	J	Translation, ribosomal structure and biogenesis	K02949|1|4e-115|326|pper:18789546|small subunit ribosomal protein S11e	GO:0006412//translation	GO:0003735//structural constituent of ribosome	GO:0005840//ribosome	MAEQTEKAFLKQPKVFLSSKKTGKGKRPGKGGNRFWKSVGLGFKTPRDAIEGTYIDKKCPFTGNVSIRGRVLSGTCHSAKMSRTIIVRRNYLHYIKKYQRYEKRHSNIPAHVSPCFRVKEGDYVIIGQCRPLSKTVRFNVLKVTPAGSSGAGKKAFTGI
Prupe.1G487600.1.p	-10.3988	7.42368	2.22155e-05	0.240265	Down	XP_020423027.1	PHD finger protein EHD3 [Prunus persica]	33.54	1e-75	sp|Q6ZJM9|EHD3_ORYSJ	PHD finger protein EHD3 OS=Oryza sativa subsp. japonica GN=EHD3 PE=1 SV=1	Hs4505197	69.7	1e-11	KOG4443	Putative transcription factor HALR/MLL3, involved in embryonic development	R	General function prediction only	K13196|1|9e-172|508|pvu:PHAVU_009G130800g|zinc finger protein ubi-d4	-	-	-	MEPEEGKSNGGITVCTEKVQSLTSEAKCGSTECTEKVQSLTSEANGGNTECTEKVQSWKSEANGGSTECTEKVQTWKSEANDGSTECTHKAQCLKSEANGFEFRVCKNFAEGRSDASEVVRTYKRRRRAGSSWDSRSQEYGGADVESSSQLADQRLKEPVDTAIQNNSCEQVHLQTNSSDACSDRHWRNAVLDSMYQSLGDDEGGVQVCIREAIVHFRDIDHTTRVKESGDNDADRHQCFFPTRSILNGPHSAANGQAGVILNGSSNKTNYPTVTAMCQRAFFNVLVSENFASLCKLLLENFQGIKADSIFDLNLINSRMKKGDYEHSPMLFSHDMQQIWRKLQGIGTNLISLAKSLSDMSRSSYKEQVGGSVRNTFEGGKDEFYAFESDFHTKLEQTE…
Prupe.1G489600.3.p	10.7511	9.44075	0.013285	0.000118828	Up	XP_020409740.1	ubinuclein-1 isoform X2 [Prunus persica]	-	-	-	-	-	-	-	-	-	-	-	K17492|1|1e-150|462|atr:18436888|ubinuclein	-	-	-	MEEEKGGGESSRASSKFVKAGDRQMFTVELRPGETTIVSWKKLLKDTNKVNGPSTSSAPEPPPANAHPALESRIAPVQQLSGDEVKDEAAPHRFSAVIEKIERLYMGKDSSDDEDLNDIPDDDQYDTEDSFIDDAELDEYFEVDNSAIKHDGFFVNRGKLERIVPAALPNQQPKKRRRKEVKGPGENDDSHVPNKHAKVGKTASAKITSTLVKNSSAPIQTVTVPTEHSEDVKFQNQLNVCGLSSTKKSTDSKTILDPSLLKVSEGDAAALQAEVKDMDKQKTGVLLSKDPSNRFKDAGGSSDGSYQKYHEKSAYAQTKPQSGRPSSNADEMETVRAREKNGVCEIPDLNLTDGKYAVPTTKPSHGHKRDSSSVRSKSSMLEKAITDLEKMVAESRPPA…
Prupe.1G493100.1.p	1.60675	0.150887	5.29905e-06	0.00676926	Up	XP_007223231.1	NAC domain-containing protein 2 [Prunus persica]	71.29	8e-153	sp|Q39013|NAC2_ARATH	NAC domain-containing protein 2 OS=Arabidopsis thaliana GN=NAC002 PE=2 SV=2	-	-	-	-	-	-	-	K00521|1|2e-52|188|cpep:111802683|ferric-chelate reductase [EC:1.16.1.7]!K13126|3|2e-09|62.0|fve:101312606|polyadenylate-binding protein!K03094|4|1e-08|58.5|lja:Lj2g3v3084320.1|S-phase kinase-associated protein 1!K16296|5|2e-08|59.3|aof:109839885|serine carboxypeptidase-like clade I [EC:3.4.16.-]	GO:0009611//response to wounding;GO:0006355//regulation of transcription, DNA-templated;GO:0006351//transcription, DNA-templated;GO:0009788//negative regulation of abscisic acid-activated signaling pathway	GO:0003677//DNA binding	GO:0005634//nucleus	MSSSDLQLPPGFRFHPTDEELVKHYLCRKCQSQPISVPIIAEIDLYKYNPWDLPGLALYGEKEWYFFSPRDRKYPNGSRPNRAAGSGYWKATGADKPIGNPKPVGIKKALVFYAGKAPRGEKTNWIMHEYRLADVDRSPRKKSSSLRLDDWVLCRIYNKKGTVEKQQQQQQQQQQPTTTSRMSSGSEFEDRKPENLACPPPAAVAPTRPNDYVYFDTSDSVPRLHTDSSCSEHVVSPEFTCEVQSEPKWKEWEKALDFNYNYMDTTVENGFGAQFQSSNQMSPLQDIFMYLQKPY
Prupe.1G499700.1.p	-10.2242	6.57792	0.00868588	0.147066	Down	XP_007222472.1	UDP-galactose transporter 1 [Prunus persica]	85.34	0	sp|Q9C521|UGAL1_ARATH	UDP-galactose transporter 1 OS=Arabidopsis thaliana GN=UDP-GALT1 PE=2 SV=1	At1g77610	596	0	KOG1441	Glucose-6-phosphate/phosphate and phosphoenolpyruvate/phosphate antiporter	GE	Carbohydrate transport and metabolism;Amino acid transport and metabolism	K15285|1|0.0|692|pavi:110750567|solute carrier family 35, member E3			GO:0016021//integral component of membrane	MEETRLCQWSVIRSLLAILQWWGFNVTVIVMNKWIFQKLDFKFPLTVSCIHFICSAIGAYTVIKILKLKPLITVEPEDRWRRIFPMSFVFCINIVLGNVSLRYIPVSFMQTIKSFTPATTVVLQWLVWRKYFDWRIWCSLIPIVGGILLTSVTELSFNMLGFCAALFGCLATSTKTILAESLLHGYKFDSINTVYYMAPFATMILAVPAVVLEGNGVIEWLHTHQTLVPSLIIIFSSGVLAFCLNFSIFYVIHSTTAVTFNVAGNLKVAVAVLVSWMIFKNPIPALNAVGCGITLVGCTFYGYVRHLLSQQLPGTPRTPRTPRGRMELLPLVNDKLDDKV
Prupe.1G500400.1.p	-10.4256	7.56515	0.00013669	0.253139	Down	ONI34813.1	hypothetical protein PRUPE_1G500400 [Prunus persica]	56.93	1e-153	sp|F4HZQ7|WTR5_ARATH	WAT1-related protein At1g21890 OS=Arabidopsis thaliana GN=At1g21890 PE=2 SV=1	-	-	-	-	-	-	-	K17500|1|2e-62|216|nto:104085001|integrin-linked kinase-associated serine/threonine phosphatase 2C [EC:3.1.3.16]		GO:0022857//transmembrane transporter activity	GO:0016021//integral component of membrane	MGDQIAKGKLALFLYKIKPYLAMISLQFGYAGMYIISMVGLKRGMSHFVLAVYRHLIAVVVIAPFALVLERSLYFSLFLHLFSSTKRHACVKIRPKLTLPIFLRIMVLGFLEPVFAQNLYFVGMTYTSATFASATANILPAITFIFALLFRLEKINFKKIPSVAKVIGTVITVMGAMVMTWYKGPIVEIIRGQTQSHHNTTALSTEQHWITGTFMLLARCCGWSGFFILQSFTLKLYPAELSLTALICLMGALEGAVATFILEHNMSVWVIGWDSRLLAAGYSGVVCSGIAYYVQGVVMKEQGPVFVTAFSPLAMIITAALAAIILAEQIHLGSILGTILIVIGLYAVVWGKSKDPTASSLLIEDEKVVALELPVTVDNKTDGTGPPGDFIKVPIKAQE…
Prupe.1G500500.1.p	-10.5012	7.97146	8.10223e-05	0.568126	Down	XP_007223359.1	WAT1-related protein At4g08300 [Prunus persica]	63.46	2e-164	sp|Q501F8|WTR32_ARATH	WAT1-related protein At4g08300 OS=Arabidopsis thaliana GN=At4g08300 PE=2 SV=1	-	-	-	-	-	-	-	K17500|1|1e-66|226|nto:104085001|integrin-linked kinase-associated serine/threonine phosphatase 2C [EC:3.1.3.16]		GO:0022857//transmembrane transporter activity	GO:0016021//integral component of membrane	MGDQSPTGSKLSPVLIKIKPYLAMVSLQFGYAGMYIISMVSFKHGMSNFVLSVYRHVVAFCVIAPFAFVLERKIRPRMTLPIFLRIVLLGFLEPVLDQNLYFLGMKYTSATFASAVVNVLPAITFIMAVFFRLESVNVKKLHSLAKVVGTVITVGGAMVMTLYKGPIVDIIRGHAHSHGTSTTDSTNQHWVAGPLMLLASCGGWASFFIVQSFTLKKYPAELSLTAWICIMGVLEGGVITFAVERKMSVWVIGWDSRLLASVYSGIVCSGLAYYVQGVVSRERGPVFVTAFSPLCMIITAALGAIVLAEKVHLGSIIGAIFIVFGLYTVVWGKSKDPLASSAPLKDEKSNNLELPVTADPNGISGRT
Prupe.1G501600.1.p	-10.0593	5.86594	2.81528e-05	0.377727	Down	XP_007223716.2	uncharacterized protein LOC18793094 [Prunus persica]	-	-	-	-	-	-	-	-	-	-	-	-	-	-	-	MKSKEDRKMMRGVGGPLLCIGDLLSDVGETDASPLPPQQQHEPSSSSPISSSTESLDLTKLFQENYEQLNEALAGTDHSWAALTLKLCSALDTANKLVQSTNSNVMSLSEKVGELEGVVKRADSAIAAARVVHGSLNKTEGKLIGNENVK
Prupe.1G506800.1.p	1.01978	0.35963	0.0219584	0.257698	Up	XP_008233937.1	PREDICTED: cytochrome b-c1 complex subunit 9-like [Prunus mume]	79.17	1e-37	sp|P46270|QCR9_SOLTU	Cytochrome b-c1 complex subunit 9 OS=Solanum tuberosum PE=1 SV=1	At3g52730	125	2e-39	KOG3494	Ubiquinol cytochrome c oxidoreductase, subunit QCR9	C	Energy production and conversion	K00419|1|4e-47|147|pavi:110753052|ubiquinol-cytochrome c reductase subunit 9	GO:0006122//mitochondrial electron transport, ubiquinol to cytochrome c		GO:0005750//mitochondrial respiratory chain complex III	MDSAARRTSGGVFEGLYRVIMRRNSVYVTFVIAGAFLGERAVDYGVHKLWEYNNVGKRYEDISVLGQRPSEE
Prupe.1G519700.1.p	10.2742	6.77955	2.56943e-05	0.000118828	Up	XP_007225655.1	7-deoxyloganetin glucosyltransferase [Prunus persica]	66.46	0	sp|F8WKW1|UGT2_GARJA	7-deoxyloganetin glucosyltransferase OS=Gardenia jasminoides GN=UGT85A24 PE=1 SV=1	At1g22360	662	0	KOG1192	UDP-glucuronosyl and UDP-glucosyl transferase	GC	Carbohydrate transport and metabolism;Energy production and conversion	K22706|1|0.0|732|pmum:103319663|(R)-mandelonitrile beta-glucosyltransferase [EC:2.4.1.354]!K13030|3|5e-137|407|sbi:8060874|cyanohydrin beta-glucosyltransferase [EC:2.4.1.85]	GO:0008152//metabolic process	GO:0016758//transferase activity, transferring hexosyl groups	-	MSSIALTSKKSHAVFVPFPSQGHINPLMQLAKLLHYKGFHITFVNTEYNHKRLLKSRGPDALNGLPTFRFETISDGLPPTDADATQDIPSLCDSTSKHSLPHFRDLLSKLNSSPDSPRVTCLITDGVMSFTLDAAQELGVPAVFFWTPSACGFMGYVQFHQLIEKGLTPFEDASYFTNGHLNTVLDWVPGMRNIRLKDLPTFMRTTEPDDIMLNFLVGETERTKKASAVILNTFHDLEHEVIDSLSTLLPPVYSIGPLNLQLKQIPAENELKSIVSNLWTEEPECLQWLDTKEPNSVVYVNFGSIAVTTNEQLIEFAWGLANSKKKFLWVIRPDLVRGESAVVPAEFLEETKDRSLLAHWCPQEQVLSHPAVGGFLTHSGWNSTLESLCGGVPLICWSF…
Prupe.1G520800.1.p	-1.14068	0.312471	0.0354797	0.294827	Down	XP_007222765.1	protein EXORDIUM [Prunus persica]	68.2	5e-146	sp|Q9ZPE7|EXO_ARATH	Protein EXORDIUM OS=Arabidopsis thaliana GN=EXO PE=2 SV=1	-	-	-	-	-	-	-	K00020|1|3e-25|108|mtr:MTR_8g088900|3-hydroxyisobutyrate dehydrogenase [EC:1.1.1.31]!K14299|2|4e-17|85.5|mdm:103418195|nucleoporin SEH1	-	-	-	MSAFLKLLLLISLFHFGSAARSLSETSSDQTQQPSLQFQYHNGPLLSGKFSINLIWYGNFKPSQRAIVSDFITSLASPPQSKPASGQPSVATWLKSIEKYYHLLSSKKQYSLSLSLGTQTLDDKYSLGKSLTARQIQQLASKGAQNYAINVVLTSSDVLVDGFCMSKCGSHSSSSSSSHIRGKTQKFTYIWVGNSETQCPGQCAWPFHQPIYGPQGPPLVAPNNDVGLDGMVINLASLLAGTVTNPFGNGYYQGPKEAPLEAASACTGVYGKGAYPGYAGNLLVDPTTGASYNAHGSNGKKFLLPALFDPSTSTCSTLV
Prupe.1G533300.1.p	10.3731	7.26093	2.39907e-05	0.0354331	Up	XP_020410479.1	uncharacterized protein LOC18788972 [Prunus persica]	64.45	2e-86	sp|O04492|DRB1_ARATH	Double-stranded RNA-binding protein 1 OS=Arabidopsis thaliana GN=DRB1 PE=1 SV=1	-	-	-	-	-	-	-	-	-	-	-	MATNEGFQGVSNCYVFKSQLQEYAQKVEIPTPVYETIKEGPSHEPSFKSTVIVNNVRYDSLLGFSNRKLAEQSAAEVALVELAKSGDINQSISQPIHETGLCKNLLQEYAQKMNYAIPLYQCQKEETPGRVPLFSCTVEIGGIRYVGAAAKTKKEAEIKVARTALLAIRSSKSESSMEPVGNTQLTVLPSKKRRAESNTKSEETANVPKPKKGRFKKRNFKKKLSGDMVGQTQVRNVGDMEVNVGGSEISGGGANPSVKPMDAEVTPNTHDSMSHVIPSENQTSALEPGSVPQVNTFSAKKGESTASFFNHGDYGTLDEGAFPISYGNITPLAKEVNMVSGAAEVVSLANNSNLQLFNHGDDNGTLDVEAYPISCGNLTSVAEEENMVSGAGESISLAN…
Prupe.1G542900.1.p	10.279	6.80224	2.56086e-05	0.024156	Up	XP_020424666.1	protein FAM135B [Prunus persica]	-	-	-	-	At1g58350	1097	0	KOG2205	Uncharacterized conserved protein	S	Function unknown	K00940|1|2e-18|92.8|gmx:100786376|nucleoside-diphosphate kinase [EC:2.7.4.6]	-	-	-	MFRHLGWLVGLNYKSPSSKRLPDAKPPPAEVKPVAMLDSVQEIAIYIHRFHNLDLFQQGWYQIKITMRWEDSEYTSVGTPARVVQYEAPDLGSDDVYGVWRIDDTDNSFSTQPFRIKYARQDIFLSIMISFNLSLSRYEGLSSSAVILKFELLHAPILGNRSDLQASLDASPAAVHEFRIPPKALLGLHSYCPVHFDVFHAVLVDVTVHISLLKAVSYTLPSKVPSDSSIAEDVGGEGLSGSNQASAQVAAAGVNDIMLVKSLLSARDILLEELQKLSKAIDQAIDLTDFISKMDDTKFDSILQENLVAADAKVSGQGKPQNGLEKVNGTSEFGSGELLRPLSRGALLNSFHSLGDQVLYLWNTFLNFHRFNKTKVLEYLRDTWAKDRKAEWSIWMVYS…
Prupe.1G557500.1.p	10.1445	6.19592	2.81148e-05	0.0156107	Up	XP_007222696.1	alpha-(1,4)-fucosyltransferase [Prunus persica]	67.64	0	sp|Q9C8W3|FUT13_ARATH	Alpha-(1,4)-fucosyltransferase OS=Arabidopsis thaliana GN=FUT13 PE=2 SV=2	At1g71990	582	0	KOG2619	Fucosyltransferase	GE	Carbohydrate transport and metabolism;Amino acid transport and metabolism	K14412|1|0.0|867|pper:18793901|alpha-1,4-fucosyltransferase [EC:2.4.1.65]	GO:0006486//protein glycosylation	GO:0008417//fucosyltransferase activity	GO:0016021//integral component of membrane;GO:0032580//Golgi cisterna membrane	MQLKPFNSLSIAFMMGGAFLILFLCSFLEFPSISTSIQPMKDPNLSLSLTKSTPDPFTNLISAFKKWDSQVGCAHFRGKHHEALLQSQNQNGSSSSLQQVQLGIESECREPKVEHISVMVKGWTWIPDNLDNLYSCPCGLSCLWTKSSVLADKPDALLFETTTPPLQRNTGDPLRAYMDLEAGRKKSGFEDLFISYHAKDDVQCTYAGALFHNGRNYHVSSYKHNDTLVYWSSSRCLPQRNKLAYKLLSLLPHHSFGKCLNNVGGLDMALSFYPECASDASVSQKWWDHLHCAMSHYKFVLAIENTMTESYVTEKLFYALDSGAVPIYFGAPNVWDFVPPHSIIDGTKFSKLEELASYVKALANDPVAYAEYHGWRRCGVMANYVKTRALSLDTLPCRL…
Prupe.1G560100.1.p	-1.18065	0.348902	0.0116965	0.212864	Down	XP_020421993.1	NAC domain-containing protein 104 isoform X1 [Prunus persica]	60.49	7e-76	sp|Q8GWK6|NC104_ARATH	NAC domain-containing protein 104 OS=Arabidopsis thaliana GN=NAC104 PE=2 SV=1	-	-	-	-	-	-	-	K00521|1|4e-26|109|cmos:111447866|ferric-chelate reductase [EC:1.16.1.7]!K13126|3|4e-09|59.7|fve:101312606|polyadenylate-binding protein	GO:0010089//xylem development;GO:0048367//shoot system development;GO:0006355//regulation of transcription, DNA-templated;GO:0043067//regulation of programmed cell death;GO:0006351//transcription, DNA-templated	GO:0003677//DNA binding	GO:0005634//nucleus	MGDDQFKLPPGFRFDPTDEELVVHFLQRKAALLPFHPDVIPDLHLYPYDPWELDGKALREGNKWYFYSRRTQNRVTSNGYWKALGVEEPVITRSSCNSTHKVGMKRYLAFYVGEAPNSGIKTNWIMHEYRLSPLSAGDGASSSSSSSTTTRSSKRRGHLKTVNNEFSEYVLCRVYERDEDDDDDDDGTVLSCLDEVFLSLDDLDEISLPI
Prupe.1G560700.1.p	1.55435	0.31974	0.00462786	0.164206	Up	ONI35920.1	hypothetical protein PRUPE_1G560700 [Prunus persica]	75.36	1e-33	sp|P48504|QCR6_SOLTU	Cytochrome b-c1 complex subunit 6 OS=Solanum tuberosum PE=1 SV=2	At1g15120	130	6e-41	KOG4763	Ubiquinol-cytochrome c reductase hinge protein	C	Energy production and conversion	K00416|1|5e-45|144|pavi:110767101|ubiquinol-cytochrome c reductase subunit 6	GO:0006122//mitochondrial electron transport, ubiquinol to cytochrome c	GO:0008121//ubiquinol-cytochrome-c reductase activity	GO:0005743//mitochondrial inner membrane;GO:0070469//respiratory chain	MVSSECSQYWILPLIVGTGSSVSCSSDITIMYSPTPVCKTYDIVDVGLFVFCMADEEPVDQKKYLEESCKPKCVKPLLEYQACVKRIQGDESGHKHCTGQYFDYWSCVDKCVAPKLFPKLK
Prupe.1G584800.1.p	-1.25989	0.513812	0.0398093	0.305277	Down	XP_007221951.1	sphingoid long-chain bases kinase 1 [Prunus persica]	72.84	0	sp|Q9LRB0|LCBK1_ARATH	Sphingoid long-chain bases kinase 1 OS=Arabidopsis thaliana GN=LCBK1 PE=1 SV=1	At5g23450	1046	0	KOG1116	Sphingosine kinase, involved in sphingolipid metabolism	IT	Lipid transport and metabolism;Signal transduction mechanisms	K04718|1|3e-177|517|oeu:111409900|sphingosine kinase [EC:2.7.1.91]!K04715|2|3e-84|279|sbi:8076578|ceramide kinase [EC:2.7.1.138]	GO:0030148//sphingolipid biosynthetic process	GO:0003951//NAD+ kinase activity;GO:0017050//D-erythro-sphingosine kinase activity	GO:0005886//plasma membrane	MQNSGIVSNSKNNLRVTTPQQSLRRLGLCSQIATATGGQHSSPIVFPEKQKRHKIKAASKTPPTPTPADDPNIVKALDHRIDIRASAAGDEKSDLLGYAVFSGKLVLDKRKTSSINTTSTDAQQQQTSSSSNDITNQEAVDAKLTSKALIWGSHMLHLDDVISVSYNVGLRHFTVHSYPLKKGSCGLSCFMKPRRSRKDFRFLASSIEEAVQWVGGFADQQCYVNCLPHPLLSSKKQASSELLPIDTPPELIFKCKSPPKMLVILNPRSGRGRSSKVFHAVVEPIFKLAGFKLEVVKTTSAGHARKLASSVDISTCPDGIICVGGDGIINEVLNGLLSRDNQKEGISIPIGIVPAGSDNSLVWTVLGVRDPVSAAIAIVKGGLTATDVFAVEWIQTGVI…
Prupe.2G003400.1.p	-1.19569	0.268269	0.00211936	0.147918	Down	XP_007220574.1	callose synthase 2 [Prunus persica]	79.83	0	sp|Q9AUE0|CALS1_ARATH	Callose synthase 1 OS=Arabidopsis thaliana GN=CALS1 PE=1 SV=2	At1g05570	3007	0	KOG0916	1,3-beta-glucan synthase/callose synthase catalytic subunit	M	Cell wall/membrane/envelope biogenesis	K11000|1|0.0|4047|pper:18785995|callose synthase [EC:2.4.1.-]	GO:0006075//(1->3)-beta-D-glucan biosynthetic process	GO:0003843//1,3-beta-D-glucan synthase activity	GO:0016021//integral component of membrane;GO:0000148//1,3-beta-D-glucan synthase complex	MAYRRGFDQQPQRRILRTQTAGSFGEPMLDSEVVPSSLVDIAPILRVANEVEARNPRVAYLCRFYAFEKAHRLDPTSSGRGVRQFKTALLQRLERENETTLAGKQKSDAREMQSFYRDYYKKYIQALQNAVDKADRAQLTKAYQTAAVLFEVLKAVNQTEAVEVAEEILEAHTKVEEKQQIYVPYNILPLDPDSQNQAIMRFPEIHATVSALRNTRGLPWPKDHKKKVDEDILDWLQAMFGFQKDNVANQREHLILLVANVHIRQLPKPDQQPKLDDRALTDVMKKLFKNYKKWCKYLDRKSSLWLPTIQQEVQQRKLLYMGLYLLIWGEAANLKFMPECLCYIYHHMAFELYGMLAGSVSPMTGEHIKPAYGGEEEAFLTKVVTPIYDTIAKEAKRSK…
Prupe.2G015000.1.p	2.54795	0.525187	0.016715	0.236678	Up	XP_007220607.1	uncharacterized protein LOC18786298 [Prunus persica]	-	-	-	-	-	-	-	-	-	-	-	-	-	-	-	METQDNEIESLNSTSSWSSAANWTIAGGCLVNCVSFESSSSPIDDETLKSTSESSLILLPPSPDSVPCEITINFTQKHEVQQVYVRSTARVYEIYYAPDLQSGNEYLCTVRCGIADRDEEVLHTGDNEEVRSTNSNGSLKDPSEENSRNGNGLNTSEDDWIEVKVPDTHVLDNKTKSLPLKLGSAQAFYEATAQISDASPCVSLTLRLLSLERKDCVCVDEVYVFADPVDSADSENQVSTVESSAGSSLMAMLVPTLLQFSKTSGAHRTQDRHNSDTWEKQNSLEIGSHTVGSTSAATKIQEEGKASIPDHQELKVNRATVGTAQLQIPPLVPFRESKPDSPPYSHVERAVDQLCSRMGRIEDLVLRFEENMLKPISSIEARLERVEQQLEVLTRKSQN…
Prupe.2G036100.1.p	-10.319	7.02384	2.34876e-05	0.365483	Down	XP_007218986.2	uncharacterized protein LOC18787241 isoform X1 [Prunus persica]	-	-	-	-	-	-	-	-	-	-	-	K01880|1|8e-29|127|gsl:Gasu_19070|glycyl-tRNA synthetase [EC:6.1.1.14]!K20285|2|4e-19|95.1|smo:SELMODRAFT_431517|Rab9 effector protein with kelch motifs	-	-	-	MNNFLTVVSASVAVVLAIIASLPLLKPNHQLLSWRSPMADLVVKNAKIYTSDESLPFADSMAVRSGRVLRVGNYSSIKDMVGDGTKELDLMGKIVVPGFIDSHVHLISGGLQMARVELRGVSQKDEFVRRIKEAVRNANKGSWILGGGWNNDLWGGELPMASWVDDITPYNPVWLSRMDGHMGLANSVALKLAGITTSSEDPNGGTIVRFTSGEPTGLLIDSAMKLLLLSIPEVSVEERREALSRASNHALMRGVTTVVDVGRYFPGTSVKLSWDDFSDVYKWADSSGKMMIRVCLFFPLETWLQLHNLITKVGHTMSQWIYLGGVKAFADGSLGSNSALFYEPYADEPHNYGLQVIDNESLLNLTLASDRVGLQVAIHAIGDRANDLILDMYESVFST…
Prupe.2G041500.1.p	1.12573	0.368249	0.0184018	0.241449	Up	XP_007218585.1	NADH dehydrogenase [ubiquinone] 1 alpha subcomplex subunit 6 [Prunus persica]	69.23	8e-66	sp|Q9LHI0|NDUA6_ARATH	NADH dehydrogenase [ubiquinone] 1 alpha subcomplex subunit 6 OS=Arabidopsis thaliana GN=At3g12260 PE=2 SV=1	At3g12260	196	2e-65	KOG3426	NADH:ubiquinone oxidoreductase, NDUFA6/B14 subunit	C	Energy production and conversion	K03950|1|4e-96|276|pper:18786488|NADH dehydrogenase (ubiquinone) 1 alpha subcomplex subunit 6	-	-	-	MSFIQRAVKVPPNSVSLEEARHRVFDFFRAACRSIPTIMEIYNLDDVVAPSHLRSVVASEIRKNSSVTNPKVIDMLLFKAMEELNNITEHAKQRHHIIGQYVVGHQGLVQDLGTKDQGASGFLKDFYKSNYF
Prupe.2G044100.1.p	10.4474	7.645	2.27853e-05	0.000118828	Up	XP_020413069.1	DNA-directed RNA polymerase III subunit 2 isoform X1 [Prunus persica]	76.44	0	sp|F4KD38|NRPC2_ARATH	DNA-directed RNA polymerase III subunit 2 OS=Arabidopsis thaliana GN=NRPC2 PE=2 SV=1	At5g45140	1820	0	KOG0215	RNA polymerase III, second largest subunit	K	Transcription	K03021|1|0.0|2410|pper:18787298|DNA-directed RNA polymerase III subunit RPC2 [EC:2.7.7.6]	-	-	-	MGVAQDSSADPPKKNKQNRSNDGKQILHSAIDKEFLAAPIKSATDKFALLPEFLKVRGLVKQHLDSFNYFVNTGIKKIVRANDRIVSGVDPSIYLRFKDISIGEPSLTMDGVTEKIAPHTCRLSDMTYSAPIKVDVEYIQGSHDQKTRVEKKGVVIGRMPIMLRSCSCTLYGKTESELAKLGECPLDPGGYFIIKGNEKVLLMQEQLSKNRIIIDMDKKGNLNASVTSSSERIKSKTIIQMENQKIYLMLNQFVKKIPIMVVMKAMGMESDQEVVQMVGRDPRYAALLMPSIEDCAKEGIHKQEQALAYLETKVKRFSFAGASSENDGRVMTVLQDVFLANVEVCQDNFRPKCIYVAVMLRRIMDAILNKDAMDDKDYVGNKRIELSGQLISLLFEDLF…
Prupe.2G059400.1.p	10.3438	7.11558	0.007189	0.00285037	Up	XP_020412036.1	TMV resistance protein N [Prunus persica]	44.31	1e-95	sp|Q40392|TMVRN_NICGU	TMV resistance protein N OS=Nicotiana glutinosa GN=N PE=1 SV=1	At5g48620	82	4e-16	KOG4658	Apoptotic ATPase	T	Signal transduction mechanisms	K22038|1|3e-101|328|aip:107645897|volume-regulated anion channel!K08852|4|4e-88|290|mdm:103426788|serine/threonine-protein kinase/endoribonuclease IRE1 [EC:2.7.11.1 3.1.26.-]	-	-	-	MTTESSSNLLSSSSSTSGWKYDVFLSCRRNGSCRKFKDHLYAALNKRGIFTIGDDDEWERGREEAILKAVEESRYVILVLSQNYASSTWCLDALAKAVECTKSMGQTILPIFYDVEPYEVLRQKGSFAEAFSKHEQVFKDNMGKVYRWRAALDTVGNLNGWNLQDGYESKAIQTIVEWIFNELNEAISSVSKDLVGIDSRVKEVLSYLESETWPDDARIIGISGMKGIGKTTIARVVFDSIRARFEACSFLADIREVTDKQGPTHLQKQLLSDLLKRSVNIWNVEMGINVLRERLQNKKVLIVLDDVDQLEQLAALCDRSCFGLGSRIIITSRDERLLSTFGVDKVYKVEPLTDEEAFKLFSSKAFKKDVVGEEFLELSKNVVEFANGLPLALKGLGSF…
Prupe.2G084400.1.p	10.1342	6.15186	2.83162e-05	0.000132349	Up	XP_020412548.1	uncharacterized protein LOC18787927 [Prunus persica]	24.49	3e-08	sp|Q9LDX1|SGS3_ARATH	Protein SUPPRESSOR OF GENE SILENCING 3 OS=Arabidopsis thaliana GN=SGS3 PE=1 SV=1	-	-	-	-	-	-	-	K22909|1|8e-141|449|egr:104421727|zinc finger CCCH domain-containing protein 13	-	-	-	MQSGKHENFNKQSPASRLRAHNRLESGPEPYSGSRRGNIRREAADHSIRGTLSPHELQQDVGVSQRTDYIDRRDYGWHLGGGRTDRVRQRSRSASPVQPFGNMRKRPHFDEGVGVLRRNYSPPPQVPVRLELPRRQELAEPGTYNATDDLNSRRVYGSDHNDSRISKEELNEIGLSAGDKHGTLSQKSVHMEDGTVRGSKSVLTEDNTVLGTYWPPPDPYPVITPGESGAHLPSSSRSMNIRHFEQERLHYLDPVALDRLPVTKSYKGENPIFPSRDGVHPMMSGAHSEDFLASSSTGIRNEFQESYRGGMHLPSLDEFSSSSRKLTDSLSINAFKQRPLANSSRDPDSGKRNLSFYQRCSPTRGEHDDYFRTKSRGMAVDDRGYPSDDLHKMMHPRAP…
Prupe.2G092300.1.p	-10.4003	7.43108	2.21933e-05	0.0282098	Down	XP_020412139.1	uncharacterized protein LOC18786784 isoform X1 [Prunus persica]	28.31	2e-34	sp|Q94KD8|BXL2_ARATH	Probable beta-D-xylosidase 2 OS=Arabidopsis thaliana GN=BXL2 PE=2 SV=1	-	-	-	-	-	-	-	K05349|1|0.0|1233|pper:18786784|beta-glucosidase [EC:3.2.1.21]	GO:0005975//carbohydrate metabolic process	GO:0004553//hydrolase activity, hydrolyzing O-glycosyl compounds	-	MAKVEDEVIEAHVKQLLSRMTLKEKVGQMTQIERQVATSAAIKDLSIGSIFSAPGSLPVEKASPSDWADMVDGFQRSALESRLGIPLIYGTDAVHGNGNVFGATIFPHNVGLGATRDADLARRIGVATALEARACGIHYTFAPCVAVCKDPRWGRCYESYSEDTEIVGKMTSIVSGLQGQPPQGYPKGYPFVAGRNNIIASAKHFVGEGGTEKGVNEGNNISSYDDLERIHMRPYLDCISQGVSTIMVSYNSWNGQRLHGHNFLLTEILKDKLGFRMQGFVISDWDGIDQLCEPEGSNYRLCISLAINAGIDMVMVPFRYEQFIEELIYLVESGEIPMSRIDDAVERILRVKFVAGLFEHPFTDTSLQDIVGCKMHRDLAREAVRRSLVLLKNGKDPME…
Prupe.2G115500.1.p	1.10804	0.425685	0.0314724	0.282216	Up	XP_007218603.1	acyl carrier protein 1, mitochondrial [Prunus persica]	69.05	3e-57	sp|P53665|ACPM1_ARATH	Acyl carrier protein 1, mitochondrial OS=Arabidopsis thaliana GN=MTACP1 PE=1 SV=1	At2g44620	173	5e-57	KOG1748	Acyl carrier protein/NADH-ubiquinone oxidoreductase, NDUFAB1/SDAP subunit	CIQ	Energy production and conversion;Lipid transport and metabolism;Secondary metabolites biosynthesis, transport and catabolism	K03955|1|9e-89|256|pper:18787332|NADH dehydrogenase (ubiquinone) 1 alpha/beta subcomplex 1	GO:0006633//fatty acid biosynthetic process		GO:0005759//mitochondrial matrix	MALRAALLRHVRIPAQTLNPALTLTGGKWGPPSLRWMSSHDDHLTKSEVTERVLSVVKSFPKVDPSTVTSDVHFQKDLGLDSLDNVEIVMALEEEFKLEIPDKEADKIDSTNLAIEYIYNHPMAG
Prupe.2G140500.1.p	1.03175	0.356855	0.0201608	0.247296	Up	XP_007221009.1	Golgi SNAP receptor complex member 1-2 [Prunus persica]	82.81	3e-156	sp|O22151|GOS12_ARATH	Golgi SNAP receptor complex member 1-2 OS=Arabidopsis thaliana GN=GOS12 PE=1 SV=2	At2g45200	444	3e-160	KOG3208	SNARE protein GS28	U	Intracellular trafficking, secretion, and vesicular transport	K08495|1|2e-176|488|pper:18784907|golgi SNAP receptor complex member 1	GO:0015031//protein transport;GO:0006888//ER to Golgi vesicle-mediated transport		GO:0005801//cis-Golgi network;GO:0016021//integral component of membrane;GO:0000139//Golgi membrane	MTTDSNLELQESGWEELRREARKIEGDLDVKLSSYAKLGARFTQGGYVESGSPSVGSSRSWKSMEMEIQSLLEKLLDINDSMSRCAASATPATSVTQKLARHRDILHEFTQEFRRIKGNINSLREHAELLTSVRDDISEYKASGSMSPRMQILRERAAIHGSVSHIDEVISQAQTTRAVLGSQRALFGDVQGKVKNLSDKFPIIRGLLGSIRRRRSRDTLILAAVIAACTLFLIIYWLSK
Prupe.2G140900.1.p	-10.4281	7.57604	2.17662e-05	0.925464	Down	XP_020412016.1	cysteine-rich repeat secretory protein 15 [Prunus persica]	62.6	2e-119	sp|Q6NKQ9|CRR15_ARATH	Cysteine-rich repeat secretory protein 15 OS=Arabidopsis thaliana GN=CRRSP15 PE=1 SV=1	-	-	-	-	-	-	-	K04733|1|6e-23|103|hbr:110657435|interleukin-1 receptor-associated kinase 4 [EC:2.7.11.1]	-	-	-	MVMSNLQLDYSTQKTILAPRIIISSLLFLLFSSLSIHGYPIQAHIFIYAGCSQEKYQPSSPFEANLNSFLTSVVSSSSQVSYNNFGVGNGSSTTLEGTIYGLYQCRGDLKIFDCAKCVESAVNQITLVCPYSYGASLQLEGCLIRYEHVNFLGRLDTSLRYRKCSKSSVSEDVEFFRRRDDVLAELQGTNGFRVSSSGLVEGFAQCLGDMSQNDCSSCIADAVGKLKSLCGSAAAVDVFLAQCYARYWASGYYDISDSSNQDQVGKTVAIIVGTVAGLAILIVILSVCRKTMG
Prupe.2G148800.1.p	-1.03928	0.35886	0.0231157	0.259292	Down	XP_007219038.1	cytochrome P450 704C1 [Prunus persica]	47.41	8e-174	sp|Q50EK3|C04C1_PINTA	Cytochrome P450 704C1 OS=Pinus taeda GN=CYP704C1 PE=2 SV=1	At2g45510	524	0	KOG0157	Cytochrome P450 CYP4/CYP19/CYP26 subfamilies	QI	Secondary metabolites biosynthesis, transport and catabolism;Lipid transport and metabolism	K20495|1|2e-143|426|smo:SELMODRAFT_423745|long-chain fatty acid omega-monooxygenase [EC:1.14.14.80]		GO:0005506//iron ion binding;GO:0016705//oxidoreductase activity, acting on paired donors, with incorporation or reduction of molecular oxygen;GO:0020037//heme binding	GO:0016021//integral component of membrane	MDFLSNPIFLTALVLALSIFTAQILAGKLTKAKKKHPPIAGTVLHQLLNFNRVHDYMTDLAGKHGTYRLLGLFRNEIYTSNPANVEYILKTNFDNYGKGWYNYNILKDLLGEGIFAVDGEKWRQQRKISSHDFSTKMLRDFSSVIFRKNAAKLADKVSEIATSNQAIDIQDLFMKSSLDSIFQVAFGIELDNMCGSNEEGKSFGDAFDNSSALTLWRYVDVFWRIKKFLNLGSEAALRKNTKIVNDFVFKLIHNKIEQMQKKDNCPATVDREDILSRFLQVTGTDPIYLRDIILNFIIAGKDTTATTLAWFFYLLCKHPSVQEKIVQEVKQATGMKKITNFSEFASGVSEDALEKMQYLHAAITETLRIYPAVPEDAKICFSDDTLPDGYSVRKGDMIA…
Prupe.2G149700.1.p	9.63957	4.36476	3.99111e-05	0.000118828	Up	XP_007219534.1	probable carboxylesterase 9 [Prunus persica]	53.8	2e-119	sp|O64641|CXE9_ARATH	Probable carboxylesterase 9 OS=Arabidopsis thaliana GN=CXE9 PE=2 SV=1	At2g45610	346	4e-119	KOG1515	Arylacetamide deacetylase	V	Defense mechanisms	K14493|1|4e-46|164|smo:SELMODRAFT_450797|gibberellin receptor GID1 [EC:3.-.-.-]!K07874|5|2e-35|139|cpap:110808914|Ras-related protein Rab-1A	GO:0008152//metabolic process	GO:0016787//hydrolase activity	-	MSKFDPYAHLNISHDPATDTLTRPATTPTTPTNTDPTPGDPVVFKDVTLNPETRTWARIFRPTKLPSNDNTVARLPIIIYFHHGGWILLSAADAAAHTNCSQITSEVPVIIVSVNYRLAPESRLPAQHHDALDAIHWVRAQAQDPKGENWIRDYADVSRCYLYGCGCGGNIVFFSGLKAYQLQLEPLKISGIIMNQPMFGGLQRTNSELRFATDQLLPLPVLDLMWDMALPKSTDRNHPYCNPMADEVHRDLIKRLGRCLVIGFGGDPMIDRQQEFVTMLVACGVRVDARFDDLGFHNVDFVDSRRAAAVLNIVKEFII
Prupe.2G152400.1.p	-10.2883	6.876	2.39955e-05	0.000679858	Down	XP_007218719.1	syntaxin-81 [Prunus persica]	73.23	1e-152	sp|P59277|SYP81_ARATH	Syntaxin-81 OS=Arabidopsis thaliana GN=SYP81 PE=1 SV=2	At1g51740_1	371	1e-129	KOG3894	SNARE protein Syntaxin 18/UFE1	U	Intracellular trafficking, secretion, and vesicular transport	K08492|1|0.0|637|pper:18785192|syntaxin 18	GO:0016192//vesicle-mediated transport		GO:0016021//integral component of membrane	MSKVRDRMEDFKDAVRHSALSLGYNESKLAAIMAKFIIHAPRQRSPFTRAALKTMESIGALEQFMLKHRKDYVDLHRTTEQERDSIEHEVSAFIKACQEQIDVLKNSINDDEANSKGWLGIRTDYSNADTIAHKHGVVLILSERLHSVTSQFDKLRAIRFQDTINRATPRRKLKRIANSEPADASNSNNLELREPNELQPEPLTVQQQLLDDETRALQVELTNLLDAVQQTETKMVEMSALNHLMSTHVLQQAQQIEQLYDQAVEATKNVELGNKEISKAIQRNNSSRTFLLLFIVLLTFSVLFLDWYN
Prupe.2G161000.1.p	3.92889	0.811963	0.00840771	0.190251	Up	XP_007219267.1	(+)-neomenthol dehydrogenase [Prunus persica]	62.46	1e-136	sp|Q9M2E2|SDR1_ARATH	(+)-neomenthol dehydrogenase OS=Arabidopsis thaliana GN=SDR1 PE=1 SV=1	At3g61220	388	2e-136	KOG1208	Dehydrogenases with different specificities (related to short-chain alcohol dehydrogenases)	Q	Secondary metabolites biosynthesis, transport and catabolism	K15095|1|0.0|605|pper:18787069|(+)-neomenthol dehydrogenase [EC:1.1.1.208]	-	-	-	MAEATKRYAVVTGANKGIGLETVRQLASNGFTVVLTARDEKRGLEAVEKLKESGLSGQVVFHQLDVVDPATVASLADFIKTQFGKLDILVNNAGVIGSIVDGDAFKASVASGATERGGVDFSKLVTETYELTEECLQINYYGAKRTAEALIPLLLLSDSPRIVNVSSVMGMLNNIPSDWARGVFTDAENLTEERVDEVLTELLKDFKEGSLESKGWPSSMPAYIVSKAALNAYTRILGKKYPTFRINSVCPGFVKTDINFNAGVLPVEEGGARIVKLALLPNDGPTGSFFVHNEVSDF
Prupe.2G166900.1.p	-1.13389	0.417294	0.026361	0.261746	Down	ONI23047.1	hypothetical protein PRUPE_2G166900 [Prunus persica]	59.51	3e-63	sp|Q6H5X0|RIP2_ORYSJ	Putative ripening-related protein 2 OS=Oryza sativa subsp. japonica GN=Os02g0637000 PE=3 SV=1	-	-	-	-	-	-	-	K04733|1|1e-39|148|pavi:110772601|interleukin-1 receptor-associated kinase 4 [EC:2.7.11.1]	-	-	-	MKSWRETQVGMERKMFPRGSTVLLVILLSTICLVTEAQQCRPSGRIRGRQPPPGQCNQENDSDCCVEGKMYPTYRCSPPLSRHTKAYLTLNSFEAGGDGGGPSECDNKYHNDSNRVVALSTGWYNNGGRCHNHIRINGNGRSVVAMVVDECDSMEGCDVDHDYQPPCPNNIVDASKAVWEALGVPRGQWGGLDITWSDA
Prupe.2G174300.1.p	-1.38931	0.399959	0.010355	0.206048	Down	ONI23195.1	hypothetical protein PRUPE_2G174300 [Prunus persica]	55	0	sp|P92949|FRO2_ARATH	Ferric reduction oxidase 2 OS=Arabidopsis thaliana GN=FRO2 PE=1 SV=2	At1g01580	810	0	KOG0039	Ferric reductase, NADH/NADPH oxidase and related proteins	PQ	Inorganic ion transport and metabolism;Secondary metabolites biosynthesis, transport and catabolism	K00521|1|0.0|1452|pper:18786837|ferric-chelate reductase [EC:1.16.1.7]	-	-	-	MDAQVVKSSSPPSHVGIHVMRAAIRLLAVFVVFLGSLFVWFMMPTNTYSQIWRLQIRQKTNSSSNIVMFTFPILFLALLGCVFLHLGKKLNDYKVESSSNGTKNRFAVWKKPMLVKGPLGIVSGIELAFFIMFIALLIWSFSTYLHNSFANITPKSAAKNHEKIWESKLDSAALRLGLVGNICLAFLFFPVARGSSILALFGLTSEGSIKYHIWLGHLVMLLFTAHGLCYVIYWAATGQISEMVQWDKTGISNIAGELSLLFGLIMWVTAIPRIRRKIFELFFYTHYLYILFMIFFILHVGMSYSCIMLPGFYLFLVDRFLRFLQSGTRARLICSRVLPCETLELNFAKSPGLKYNPTSVMFINVPSISKMQWHPFTVTSNSSLEPEKISVVIKAEGSW…
Prupe.2G186500.1.p	-10.4712	7.80923	0.000226513	0.146252	Down	XP_007218917.2	DEAD-box ATP-dependent RNA helicase 31 [Prunus persica]	56.75	0	sp|Q9FNM7|RH26_ARATH	DEAD-box ATP-dependent RNA helicase 26 OS=Arabidopsis thaliana GN=RH26 PE=1 SV=2	At5g08610	872	0	KOG0342	ATP-dependent RNA helicase pitchoune	A	RNA processing and modification	K17679|1|0.0|1697|pper:18785776|ATP-dependent RNA helicase MSS116, mitochondrial [EC:3.6.4.13]	-	-	-	MKTTSFSTTFMPVRLLPQLRLLSTSLPATHFPPMKFAPTLSSSRAVPILSRVFPLRLRYMGLGFRRSLQTERAFSTRAFRGPRTGSGSELPRGYERRAGGASKSLIEDEAELSDWVSELRSDSPRGREDELEGRRGRVRERGTDRESYPIKKSRRESDSGDFGESRRRDFRSPNQSFTRNGGISKRFDNKSEGDKKDRPFPPRNNRGNSNSSGEFGDSSRRRFPNPNEYFSRNSGISKRFDNKFQSDDDKEDGLFPRRNNRGNSNLKADSFTRNGGVEGLRSGGRGTGKTLRVMDDTEEEEEKPTGVRIEDFLSEEESDTAISDDDGYGVLREKSATSLFGSDNEVSVKVLPKSSPGSSDSYLSESRFDQCSVSPLSLKGIKDAGYEKMTVVQEATLPV…
Prupe.2G190100.1.p	10.0881	5.9584	2.92357e-05	0.0118045	Up	XP_007220204.2	transcription factor bHLH13 [Prunus persica]	54.95	0	sp|Q9LNJ5|BH013_ARATH	Transcription factor bHLH13 OS=Arabidopsis thaliana GN=BHLH13 PE=1 SV=1	-	-	-	-	-	-	-	K22484|1|6e-78|253|aof:109840049|transcriptional regulator CBF1!K13422|2|3e-76|259|crb:17879015|transcription factor MYC2	-	-	-	MVPVPKKDSSCFAALSNQFLMIPFCMPKLMKIEMGLGGGVWNDGDKAMVAAVLGTRAFDYLISSSVSSNENSCMGIGTDENLHNKLSDLVEPPNASNFSWNYAIFWQISRSKSGDWALCWGDGSCREPKEGEESEATRNLNLRLEDETQQTMRKIVLQKLHTLFGSSDEYNGALGLDRVTDTEMFLLASMYFSFPRGEGGPGKCFASGKHVWLSDLLKSGSDYCVRSFLAKSAGVQTIVLVPTDVGVVELGSVRCVGESLELLQSIRSLFSTQSSLTRSKPLTGFPVMGKRRDENAQLTNLSPVERGEGVPKIFGQDLNSGNSGRPRYREKLAVRKVEERPWDVYSNGNRIAFSSPRNGIQVSSWPHIHDAKQGSPTEMYASQSPVNNIQELVNGVRDD…
Prupe.2G193300.1.p	10.4163	7.48241	0.00700927	0.000118828	Up	XP_007220597.1	calcium-transporting ATPase, endoplasmic reticulum-type [Prunus persica]	82.15	0	sp|Q42883|ECAP_SOLLC	Calcium-transporting ATPase, endoplasmic reticulum-type OS=Solanum lycopersicum GN=LCA1 PE=2 SV=1	At4g00900	1705	0	KOG0202	Ca2+ transporting ATPase	P	Inorganic ion transport and metabolism	K01537|1|0.0|2155|pper:18784859|Ca2+-transporting ATPase [EC:3.6.3.8]		GO:0016787//hydrolase activity;GO:0005524//ATP binding	GO:0016021//integral component of membrane	MEEKPVPAWSWPVEQCLKEYHVKLDKGLSTYEAEKRRERYGWNELSKEKGKPLWRLVLEQFDDTLVKILLVAAFISFVLAFLGGGESGESGFEAYVEPFVIVLILILNAIVGVWQESNAEKALEALKQMQSESGKVLRDGYLVPDLPARELVPGDIVELRVGDKVPADMRVAVLKTSTLRVEQSSLTGEAMPVLKSTGPIFMDDCDLQAKENMVFSGTTVVNGSCLCVVVSTGMNTEIGKIQKQIHEASLEEDDTPLKKKLDEFGSRFTTAIGFVCLIVWVMNYKNFLSWDLVDGWPTNVRFSFERCTYYFKIAVALAVAAIPEGLPAVITTCLALGTRKMAQKNAIVRKLPSVETLGCTTVICSDKTGTLTTNQMSVTEFFTLGGKTTASRTIRVEGT…
Prupe.2G198300.1.p	10.4219	7.52092	0.000664566	0.0284822	Up	XP_007219276.2	beta-glucosidase 12 isoform X1 [Prunus persica]	66.04	0	sp|Q7XKV4|BGL12_ORYSJ	Beta-glucosidase 12 OS=Oryza sativa subsp. japonica GN=BGLU12 PE=1 SV=2	At5g42260	577	0	KOG0626	Beta-glucosidase, lactase phlorizinhydrolase, and related proteins	G	Carbohydrate transport and metabolism	K01188|1|0.0|1071|pper:18786590|beta-glucosidase [EC:3.2.1.21]	GO:0005975//carbohydrate metabolic process	GO:0004553//hydrolase activity, hydrolyzing O-glycosyl compounds	-	MAMQLRSFLLGILLLIGLAFTNSEADIRAPPTHFDTASLNRSSFPEGFVFGVGSGSYQYEGAAKEGGRGPSIWDTFTHKYPEKINDSSNGDITVDQYHRYKEDVGIMKNMGWDAYRFSISWSRLLPNGKLSGGVNKEGIKYYNNLINELLRNGLTPFVTLFHWDLPQTLEDEYGGFLSPHIVNHFQDYAELCYKEFGDRVKHWMTLNEPYTFSNYGYATGSQAPGRCSTWQQLNCTGGDSSTEPYLVTHHQLLAHAAAVKLYKNRYQASQNGVIGITLVSDWFEPLSEEKENKNAALRALDFMFGWFAEPLTSGDYPQSMRSLVGSRLPKFTKEQSKLLIGSFDFLGLNYYTGYYASDAPRNNSVYASYTTDAGVNLSSERNGVLIGPKGASEWLNVYP…
Prupe.2G208100.1.p	1.15108	0.479645	0.0431866	0.312579	Up	XP_007218313.2	vacuolar protein sorting-associated protein 24 homolog 1 [Prunus persica]	78.17	2e-120	sp|Q9FFB3|VP241_ARATH	Vacuolar protein sorting-associated protein 24 homolog 1 OS=Arabidopsis thaliana GN=VPS24-1 PE=1 SV=1	At5g22950	343	3e-120	KOG3229	Vacuolar sorting protein VPS24	U	Intracellular trafficking, secretion, and vesicular transport	K12193|1|0.0|546|pper:18785210|charged multivesicular body protein 3	-	-	-	MHTLGLDLKSQAREHYCCSVFFIFLRIRKRENEGNKINELKKMNKVKSLLKPKPNPSEQLRDWQRRLRQECRNLERQIRDIQKEEKAVHKSIREAAKRNDMGTAKALAKEILMSRKAVNRLHENKAQLNSISMHLGESVALARTVGHLSKSAEVMKLVNNLMKAPEMAATMQEFTKEITKAGVIEEFVNDAVDSALDSEDIEEETEEEVEKVLSEIAGETAAQLPEAVRKERTKVAAQGASASQDEEAIAEGADDEEELEELRARLAQVRS
Prupe.2G209300.1.p	-10.3203	7.03356	0.000240611	0.883291	Down	XP_020413102.1	U-box domain-containing protein 14 [Prunus persica]	67.47	0	sp|Q8VZ40|PUB14_ARATH	U-box domain-containing protein 14 OS=Arabidopsis thaliana GN=PUB14 PE=1 SV=1	At3g54850	811	0	KOG0167	FOG: Armadillo/beta-catenin-like repeats	S	Function unknown	K08332|1|0.0|573|gmx:100798797|vacuolar protein 8		GO:0004842//ubiquitin-protein transferase activity	-	MGPTGEDPRNSVLSRLAESVKTISELPECRNAFRKIYGNFVRRVKLLSPLFEELRDSDKALGVEEIIALESLGEALNSAKELIKSVNQGSKLYQALQRDKIIGKFHQMTVKIEAALSKIPYDKFDMSEEVCEQIELVHTQFKRAKERKDTLDSQLEMDLSTVVGDNEPDPVIIKRLSEMLHLRTINDLKKESLAFHELIITSDGDVGDHFEKMQALLKKLKDLVLTENPEVDNSERDKSMIKHRSPVIPDDFRCPISLELMKDPVIVSTGQTYERSCIQKWLDAGHKTCPKTQQTLLHTAITPNYVLKSLIALWCESNGVELPKKQGNGKNKKAGCSVSDCDRASIASLLEKLAKGNSEEQRAAAGELRLLAKRNADNRVCIAEAGAIPLLVELLSSSD…
Prupe.2G221600.1.p	1.06358	0.287011	0.0341431	0.291963	Up	XP_007218141.1	CDP-diacylglycerol--glycerol-3-phosphate 3-phosphatidyltransferase 2 [Prunus persica]	82.23	2e-110	sp|O80952|PGPS1_ARATH	CDP-diacylglycerol--glycerol-3-phosphate 3-phosphatidyltransferase 1, chloroplastic OS=Arabidopsis thaliana GN=PGPS1 PE=1 SV=1	At2g39290	325	5e-110	KOG1617	CDP-alcohol phosphatidyltransferase/Phosphatidylglycerol-phosphate synthase	I	Lipid transport and metabolism	K00995|1|0.0|765|pper:18787445|CDP-diacylglycerol---glycerol-3-phosphate 3-phosphatidyltransferase [EC:2.7.8.5]	GO:0008654//phospholipid biosynthetic process	GO:0008444//CDP-diacylglycerol-glycerol-3-phosphate 3-phosphatidyltransferase activity	GO:0016021//integral component of membrane	MSALVLKMTTAASSIYPKKKPYHQKLSNWVWVSPQRPTSSTTTTPSPSSPPALNTPIQAFTQTHNKYGCRITPCAPLAHPNHPHPPHILLQNLGPRFLKCLSVSSRSSSSSSGGFSEDKGESSGSGSGSEPGPAAGLMADMGSDNKGTDWYESQLYQNHDELLSPLKQRQQQQQQHSSSKLLTLPTILTLGRVASVPILISTFYVDSRWGTTATTSIFIAAAITDWLDGYIARKMRLGSAFGAFLDPVADKLMVAATLVLLCSRPLDVAMFGQVPWLLVVPSIAIIGREITMSAVREWAASQNSKLLEAVAVNNLGKWKTATQMIALTVLLATRDSSLGRPEALVASGVALLYISAGLAVWSLVVYMSKIWKVLLK
Prupe.2G232000.1.p	-1.1431	0.210656	0.000626026	0.110963	Down	ACG30677.1	histone H4 [Zea mays]	100	2e-68	sp|P0CG89|H4_SOYBN	Histone H4 OS=Glycine max PE=3 SV=1	At5g59970	199	4e-68	KOG3467	Histone H4	B	Chromatin structure and dynamics	K11254|1|7e-67|199|ppp:112293815|histone H4	GO:0006334//nucleosome assembly	GO:0042393//histone binding;GO:0003677//DNA binding;GO:0046982//protein heterodimerization activity	GO:0005634//nucleus;GO:0000786//nucleosome;GO:0000788//nuclear nucleosome	MSGRGKGGKGLGKGGAKRHRKVLRDNIQGITKPAIRRLARRGGVKRISGLIYEETRGVLKIFLENVIRDAVTYTEHARRKTVTAMDVVYALKRQGRTLYGFGG
Prupe.2G238800.1.p	1.00784	0.421427	0.0437529	0.313289	Up	XP_007220990.1	ribulose bisphosphate carboxylase/oxygenase activase, chloroplastic isoform X1 [Prunus persica]	85.77	0	sp|Q7X9A0|RCA1_LARTR	Ribulose bisphosphate carboxylase/oxygenase activase 1, chloroplastic OS=Larrea tridentata GN=RCA1 PE=1 SV=1	At2g39730	763	0	KOG0651	26S proteasome regulatory complex, ATPase RPT4	O	Posttranslational modification, protein turnover, chaperones	K02960|1|2e-49|176|cpap:110817833|small subunit ribosomal protein S16e!K09753|2|3e-07|57.0|dosa:Os09t0262000-00|cinnamoyl-CoA reductase [EC:1.2.1.44]!K03064|3|4e-06|53.5|gmx:100817206|26S proteasome regulatory subunit T4		GO:0005524//ATP binding;GO:0046863//ribulose-1,5-bisphosphate carboxylase/oxygenase activator activity	GO:0009579//thylakoid;GO:0009570//chloroplast stroma	MATAVSTIGAVNRAPLSLNGSSSSASVPSSTFLGSSLKKVNSRFTNSKVSSGSFRIVAEVDEDKQTDKDKWRGLAYDTSDDQQDITRGKGMVDSLFQAPQDAGTHFAVMSSYEYISTGLRQYNLDNNMDGFYIAPAFMDKLVVHITKNFMTLPNIKVPLILGIWGGKGQGKSFQCELVFAKMGISPIMMSAGELESGNAGEPAKLIRQRYREAADIIRKGKMCALFINDLDAGAGRLGGTTQYTVNNQMVNATLMNIADNPTNVQLPGMYNKEENPRVPIIVTGNDFSTLYAPLIRDGRMEKFYWAPTREDRIGVCIGIFRSDNVAKEDIVKLVDTFPGQSIDFFGALRARVYDDEVRKWITGVGVDGVGKRLVNSKEGPPTFEQPKMTIEKLLEYGNM…
Prupe.2G239000.1.p	-10.4245	7.55707	1.66454e-05	0.365483	Down	XP_007218339.1	AT-hook motif nuclear-localized protein 15 [Prunus persica]	53.35	3e-79	sp|Q9M2S3|AHL15_ARATH	AT-hook motif nuclear-localized protein 15 OS=Arabidopsis thaliana GN=AHL15 PE=2 SV=1	-	-	-	-	-	-	-	K23047|1|5e-12|71.6|bna:106447564|E3 ubiquitin-protein ligase UNKL [EC:2.3.2.27]	GO:0006351//transcription, DNA-templated	GO:0003700//DNA binding transcription factor activity;GO:0003680//AT DNA binding	GO:0005634//nucleus	MANRWWAGNVAMGGGHVDSISSTPPSLHLRNTEEQLDDHNTTNTPTNSSTSNPATTPNKQNDEHHEDGRDNNDLEADNQDPNTGSGSHDSLEPGSSNRRPRGRPPGSKNKPKPPIIITKESPNALRSHVLEISSGSDIVDSIATFAQRRHRGVSVLSGSGIVANVTLRHPAAPSGVITLHGRFEILSLSGAFLPSPSPPGATGLTVYLAGGQGQVVGGTVMGALVASGPVMVVAATFTNATYERLPLEDEQAGEGGMQVQQQQQQQQQSGVNSAGTGGNSGSQGLVEHTSSMAIYNLPPNLLPNGQMPPDVFWGPPPPRPPPPSY
Prupe.2G246600.1.p	-1.1443	0.407199	0.0228364	0.257698	Down	ONI24554.1	hypothetical protein PRUPE_2G246600 [Prunus persica]	27.94	5e-08	sp|O04133|SRC2_SOYBN	Protein SRC2 OS=Glycine max GN=SRC2 PE=2 SV=1	-	-	-	-	-	-	-	K05747|1|1e-60|201|egr:104421114|Wiskott-Aldrich syndrome protein!K19747|2|2e-25|110|vvi:100243942|BAHD acyltransferase [EC:2.3.1.-]	-	-	-	MATSRPPPPKHLDLDLTIVSAKHLKNVNWKNGDLKPYAVFWVDSDRRLATKSDDSGSTRPVWNERFTVPLTLPVHDSFLTLEIFHSKPSDTPKPLVGTLRVPLKDLPDPDDSTRIRTFQLVRPSGRPQGKIRVKLAVRERPLPPDYHMTPPPSYFYSGAPMPPPSVRDYRSYSPSPYSSLQASAPTPSASPPPPPPYHYNSYSDPYSSYYPAYYSSAPPPPPPRPFFDRQAGYSGPGGPGGPGGPSAPLDYSNYDQKPKSGKMGLGTGLAVGAVAGGIGGLALDEGLRYEEDKIAERVENELRERDDYSNYRADY
Prupe.2G247600.1.p	1.0377	0.285267	0.00661144	0.18418	Up	XP_007217937.1	nematode resistance protein-like HSPRO2 [Prunus persica]	55.96	0	sp|O04203|HSPR2_ARATH	Nematode resistance protein-like HSPRO2 OS=Arabidopsis thaliana GN=HSPRO2 PE=1 SV=1	-	-	-	-	-	-	-	-	GO:0006952//defense response;GO:0019441//tryptophan catabolic process to kynurenine	GO:0046872//metal ion binding;GO:0020037//heme binding	-	MVDLDWKAKMVSSDIPSKSPKLSNKLHVSIPGSFRAAQVQTDISEASEMACSTYEHYLRLPELRNLWSSNDFPCWRNESVLKPSLQALEISFRFISTVLSDPRPYSNRREWKRRLESLTTGQIQLIAMLIEDDEEDSETRGAAPIVDLSTSYGELARNGSSAEVWSSGETTVVSRTSEASLLPRLATWQKSEGMAQKILYSIECEMRSCPYTLGLGEPNLAGKPNLDYDAVCRPSELHSLKKSPYDHIDNYENQTVYTTHQVLESWVFVCQELLKRVTRRIEARDFEKAASDCYLIERIWKLLAEIEDLHLLMDPDDFLRLKNQLSIKTVDDTESFCFRSKGLVDVTKLCKELRHRVPYILDVEVDPKGGPRIQEAAMRLYSEKKIGSDSDSEKIHVLQ…
Prupe.2G248300.1.p	-10.6889	9.08466	0.0187955	0.787191	Down	ONI24585.1	hypothetical protein PRUPE_2G248300 [Prunus persica]	37.51	0	sp|C0LGP4|Y3475_ARATH	Probable LRR receptor-like serine/threonine-protein kinase At3g47570 OS=Arabidopsis thaliana GN=At3g47570 PE=2 SV=1	At1g73070	193	5e-52	KOG0619	FOG: Leucine rich repeat	R	General function prediction only	K19613|1|0.0|1437|pper:18785144|leucine-rich repeat protein SHOC2!K20181|2|0.0|666|mtr:MTR_5g026090|vacuolar protein sorting-associated protein 18!K04730|3|0.0|607|fve:101295381|interleukin-1 receptor-associated kinase 1 [EC:2.7.11.1]!K13428|5|0.0|587|csat:104770423|LRR receptor-like serine/threonine-protein kinase EFR [EC:2.7.11.1]	-	-	-	MDLHGPSFCAFWSIHLHVMTLLFFMNFLSPSTAANPFGNGTDRLALLKFKESILTDTHGFLNSWNDSLHFCNWYGVTCSKQHQRVAALNLEGSDLHGTIFPFLGSSTFETTACLHLTLSDNMLEGEIPVNLSYCSELSIVSFRSNRLTGKIPSELGSLTKLLTLNLGTNNLTGGIPSSLGNLSSITQLSLAYNNLADNEFKSSIPPNIGLNMPNLQQIGIGGNEFSGNIPASFSNASQFRILDITENNFLGQVPESFGNLADLQWLGLNNNNLGNYSDNDLGFITSLTNCSNLEILDMSLNNFGGVLPNSVANLSTQLTKLYLGVNQISGTIPATLENLNNLIVLGMQANLFTGSIPTSFGKFQQLQILALDENRLSGQIPSSIGNLSETASTLLISLS…
Prupe.2G250400.1.p	-9.70248	4.5793	3.61136e-05	0.167246	Down	XP_007218742.1	carboxy-terminal domain RNA polymerase II polypeptide A small phosphatase 1 [Prunus persica]	37.31	1e-17	sp|Q5S7T7|TIM50_PHYIN	Mitochondrial import inner membrane translocase subunit TIM50 OS=Phytophthora infestans GN=TIM50 PE=2 SV=1	At3g55960	434	2e-154	KOG1605	TFIIF-interacting CTD phosphatase, including NLI-interacting factor (involved in RNA polymerase II regulation)	K	Transcription	K15731|1|0.0|622|pper:18787149|carboxy-terminal domain RNA polymerase II polypeptide A small phosphatase [EC:3.1.3.16]	GO:0007623//circadian rhythm	GO:0016791//phosphatase activity	GO:0016021//integral component of membrane	MAELTQGEVVYSPKTLQVWRALVNWFGFFFQIFLQILRALGHHPLLSSSSSASSSSASFKSLPVVELQELEHDSPAASAVEIADTPDADSDDRIHKLTVVLDLDETLVCAYESSSLPAVVRDQATEGGLKWFELECVSSDKECDGKPKVNYVTVFERPGLQDFLRQVSQFAELVLFTAGLEGYARPLVDRIDVDNLFSCRLYRPSTTSTEYREHVKDLSGLAKDMRRIVIVDNNPFSFLLQPLNGIPCIAFSAGQTHDTQLLDVLLPLLKHLSLQKDVRPVLYERFHMLEWFQKQGIPSTSWK
Prupe.2G251200.1.p	-9.9999	5.62895	2.9345e-05	0.00013058	Down	ONI24632.1	hypothetical protein PRUPE_2G251200 [Prunus persica]	78.37	0	sp|P48619|FAD3C_RICCO	Omega-3 fatty acid desaturase, chloroplastic OS=Ricinus communis GN=FAD7A-1 PE=2 SV=1	-	-	-	-	-	-	-	K10257|1|0.0|926|pper:18785351|acyl-lipid omega-3 desaturase [EC:1.14.19.25 1.14.19.35 1.14.19.36]	GO:0006629//lipid metabolic process	GO:0016717//oxidoreductase activity, acting on paired donors, with oxidation of a pair of donors resulting in the reduction of molecular oxygen to two molecules of water	GO:0016021//integral component of membrane	MVQYKRNNDFDRDQKKNTKFDHVRTRLILHLVGPANHSYMRREERLQNTIERGQTTRSPSCWTWRREALVLSPHSLFSFYGRLVHSFIISQACLRHPKLKSFLYLLHLGLMASWVLSECGLKPLPRVYPQARNGLTSKTAIFANARPLPVCKSNIFGSSLRASNGIRGTNWALNVSAPLRVPSVDGGDNGRVSVNGVEDGSDFDPGAPPPFNLADIRAAIPKHLWVKDPWRSMSYVVRDVAVVLGLAAVAAYFNNWVVWPLYWFAQGTMFWALFVLGHDCGHGSFSNNPKLNSVVGHLLHSSILVPYHGWRISHRTHHQNHGHVENDESWHPLSEKVYKTLDKATQMLRFTLPFPMLAYPFYLWGRSPGKSGSHFDPNSDLFVPNERKDIITSTACWTA…
Prupe.2G260800.1.p	1.37701	0.546757	0.0358926	0.294827	Up	XP_007219210.2	peroxidase P7 [Prunus persica]	72.27	9e-175	sp|A7NY33|PER4_VITVI	Peroxidase 4 OS=Vitis vinifera GN=GSVIVT00023967001 PE=1 SV=1	-	-	-	-	-	-	-	K00430|1|0.0|649|pper:18787098|peroxidase [EC:1.11.1.7]	GO:0006979//response to oxidative stress;GO:0042744//hydrogen peroxide catabolic process	GO:0020037//heme binding;GO:0046872//metal ion binding;GO:0004601//peroxidase activity	GO:0005576//extracellular region	MASSSFMAILTLALLLQTATSNAQLSTNFYSSSCPRVFSTVRSTVQSAIRKEARIGASLLRLHFHDCFVNGCDGSLLLDDTSSFTGEKNAVPNRNSARGFDVVDNIKSAVENVCPGVVSCADILAIASRDSVAILGGPSWNVKVGRRDARTASQAAANNGIPPPTSNLNQLISRFNALGLSTRDLVALSGSHTIGQSRCIQFRPRIYNETNLDSSFAQTRRSNCPRAAGSGDNNLAPLDLQTPTAFDNNYFKNLIQNKGLLHSDQQLFNGGSTDSIVRTYSNSYNTFSSDFVSAIIKMGDIKPLTGSNGEIRKNCRKPN
Prupe.2G275200.1.p	-10.3755	7.30594	8.87403e-05	0.173839	Down	XP_020413463.1	DNA-directed RNA polymerase III subunit rpc4 isoform X1 [Prunus persica]	-	-	-	-	At5g09380	167	7e-50	KOG3122	DNA-directed RNA polymerase III subunit	K	Transcription	K03026|1|0.0|659|pper:18785477|DNA-directed RNA polymerase III subunit RPC4	-	-	-	MDKDNDGSSGRPRTHKFIPKGRKKTRAPVPAPEVGDKDDGEEARKAEALFRQFNENSRRRGPKVEKKSSVRVAFGPGADTSSTSIRTYGTAKDGNTGKSSSSGLEDSDDDQSPPTLPEVGKDVSMEDATDVEPLQTVKQRYTECWDSETTYYPTTLPLRKPNSGDPEVLNENEFGEDAEKEYDESTINHAAELGLLEEKVEARMLFVQLPTILPLTKRSATAKGKEKVGSSTSLESTGAPKKGCSLEELPGGYMGKMLVYKSGAIKLKLGNTLCDVSPGSDCLCDEDVAVINTEEKRCCVLGGISHRAVVTPNVDSLLNVISLD
Prupe.2G282000.1.p	10.5049	7.95606	2.18944e-05	0.00107047	Up	XP_007218756.1	probable rRNA-processing protein EBP2 homolog [Prunus persica]	64.31	1e-119	sp|Q9LUJ5|EBP2_ARATH	Probable rRNA-processing protein EBP2 homolog OS=Arabidopsis thaliana GN=EBP2 PE=1 SV=1	At3g22660	345	2e-119	KOG3080	Nucleolar protein-like/EBNA1-binding protein	A	RNA processing and modification	K14823|1|0.0|587|pper:18784629|rRNA-processing protein EBP2	-	-	-	MGVSNKESRQFNEDSMEEDDLEDVSEPESEPESEDEEDVKLTEPSKKAIFNRDGLLDKLGDISWPENAGWVHKLSVDIDQEQQVDVNDDLTRELAFYTQAVEGTRKAFEKLQSMGLPFLRPEDYYAEMVKTDSHMERVKSRLLVEKKKIEEADERRKARDAKKLSKEIQAQKLKERAKQKKEDIESVKKWRKQRQQSGFAGGDKGSELDLAFEDGKPFEKSSNKRPGVAPGDRSGGKARQGVKVGKKPKKRDIKDSKFGYGGRKGSKKQNMAETTNDLRGFNKDSLSGNKKRKR
Prupe.2G295500.1.p	-10.6379	8.78074	0.0315346	0.721961	Down	XP_020413954.1	DNA-directed RNA polymerase III subunit RPC3 isoform X1 [Prunus persica]	-	-	-	-	At3g49000	429	1e-145	KOG2587	RNA polymerase III (C) subunit	K	Transcription	K03023|1|0.0|1082|pper:18785025|DNA-directed RNA polymerase III subunit RPC3	-	-	-	MTLTQYGIKYAVHIITSNFGNLVAKVCEILLRRGHLSLKQLIGFTELTPQQVKNSLLILIQHNCVQPFSFDQSEGPKVTQYIALFDNIIHRGRFAKFLAVVSQELDTDRELILKDLLENGRLTLKQIIEGAESSKSQGDSADKDSVQESFLKLVNAHFVERCPAPEPVLGQATKQEGPAKKRGAKSAKMVEVPETIEQRVIAAAAPPEAIRFSIMIDSEADAPGGKSDNMSVGEKRKHATLEFDAEFESSDEVVLWRANFEEFIRCLRHKACVENVRARLDDEAAVVLRAMLKATRTAEKKVKTENSVPLSLNTIYEEVINSEAGRSLTMGRVRDSLSGLCDSSQERDVDEDESYSADLKKILELAQDDEVELIVLKRYGKDAYTMFRILSLAGRPIET…
Prupe.2G302400.1.p	-10.2018	6.47545	2.54885e-05	2.76328e-05	Down	XP_007218977.1	uncharacterized protein LOC18785494 [Prunus persica]	-	-	-	-	-	-	-	-	-	-	-	-	-	-	-	MASPTEPAHKKQARPITHLVHSTAANLLSLFASPKTTPSTPSTIRVAFLFPNSPKPLAFHSAQPDFKSAMKGVESSSESNSGFPSTVRIAGLNSNIKGGGPAFVGQVFSMCDLSGTGLMAVSTHFDIPFISKRTPEWLKKMFASVTNSERNGPVFRFFMDLGDAVTYVKRLNIPSGVVGACRLDLAYEHFKEKPHLFQFVPNEKQVKAANKLLKAMQQNGRCKRVDGVPVFSAQNLDIAIASSDGIKWYTPYFFDKNMLDNILEESVDQHFHSLIQTRHMQRRRDVIDDSLPAEVIEEMGDNLWEPPEVQEVMDEMGNPGIPLSVISKAAEMQLLYAVDKVLLGNRWLRKATGIQPKFPYMVDSFERRSAASFLRASQSSNRLANREAVNDNKDSVHCS…
Prupe.2G305200.1.p	1.96463	0.700576	0.0230441	0.259292	Up	XP_007218751.1	acidic endochitinase [Prunus persica]	69.34	4e-144	sp|P17541|CHIA_CUCSA	Acidic endochitinase OS=Cucumis sativus PE=1 SV=1	At5g24090	356	1e-123	KOG4701	Chitinase	M	Cell wall/membrane/envelope biogenesis	K01183|1|0.0|602|pper:18785306|chitinase [EC:3.2.1.14]	GO:0005975//carbohydrate metabolic process;GO:0006032//chitin catabolic process	GO:0008061//chitin binding;GO:0004553//hydrolase activity, hydrolyzing O-glycosyl compounds;GO:0004568//chitinase activity	GO:0005576//extracellular region	MALSKTQASALSLSLLIIISLCKSSQAGGIAIYWGQGSPSNEGSLADTCNTGNYQFVNIAFLSTFGNGQTPVLNLAAHCDPSTNGCTSLSTDIKACQAKNIKVLLSIGGGAGSYSLTSADDARQVADYLWNNFLGGQANSRPLGDAVLDGIDFDIEAGGGQFWDELARSLSGRGSKVYLAAAPQCPFPDAHLDGAIKTGLFDYVWVQFYNNPPCQFANNNAANLLSAWNQWTSTEAKQVFLGLPAAPEAAPSGGFIPADALKSQVLPNIKSSPKYGGVMLWSKQYDNGYSTSIKDSV
Prupe.2G322300.1.p	10.4579	7.70211	6.89857e-05	0.152892	Up	ONI25829.1	hypothetical protein PRUPE_2G322300 [Prunus persica]	50	2e-18	sp|Q9FIR9|LSU2_ARATH	Protein RESPONSE TO LOW SULFUR 2 OS=Arabidopsis thaliana GN=LSU2 PE=2 SV=1	-	-	-	-	-	-	-	-	-	-	-	MQGRKQNHKFESKVDTLNLDTQFLPFINPTTRHTLQQHFVVSLPIPKKETKMAVTKQVPEVEEEKLLRKRNEELEIELRKSQEREERMKAELQKARERLRVAEEAEERLCSQLGELEAEAVDQARTDHARILALMNQLSQAQRLLQASSVAQPLGLASK
Prupe.2G322900.1.p	10.3505	7.1501	0.0120858	0.0157397	Up	XP_007221007.1	uncharacterized protein LOC18787219 [Prunus persica]	-	-	-	-	-	-	-	-	-	-	-	-			GO:0016021//integral component of membrane	MATTLRCPQAVAPLPWRARRPNNSRGTIPMGPRQVSNIRAFGRSDIGSFARDAWRSANDGFERFLFEAKKTAERLDRRYALSHRFDTIAQSAAARAREIDRDLEIGTRWRAFSMDFSRNLPRYRKQLNDFLETPLGRSFATIFFLWFALSGWLFRLLIFATWVLPFAAPLVIGAVANNLVIKGACPACKRQFVGYKNQVIRCASCGNTVWQPKGDFFSRDGRGPSSSKSEPEIIDVEFEEK
Prupe.2G325200.1.p	-1.90649	0.673725	0.0221579	0.257698	Down	XP_007220649.1	laccase-15 [Prunus persica]	54.24	0	sp|Q9FY79|LAC14_ARATH	Laccase-14 OS=Arabidopsis thaliana GN=LAC14 PE=2 SV=1	At5g09360	653	0	KOG1263	Multicopper oxidases	Q	Secondary metabolites biosynthesis, transport and catabolism	K05909|1|0.0|1171|pper:18784745|laccase [EC:1.10.3.2]	GO:0046274//lignin catabolic process	GO:0052716//hydroquinone:oxygen oxidoreductase activity;GO:0005507//copper ion binding	GO:0048046//apoplast	MLAMRILISLQLLGLTLLCVGIFHCQASPRYTFVVEETPYRRLCSTKNILTVNGQFPGPTLYVRSGDIIIVDVYNKGNRNITIHWHGVRQLRNPWSDGPDYITQCPIQPGGSFTQTIMFSSEEGTLWWHAHSEWDRATVHGAIVIYPNKGATYPFPKPHAEFPIILGEWWKEDIGQLYKKAIQSGGEPNISSAFLINGQPGDLYPCSKPDTFKLMVDYGKTYLLRLINSAVQDILFFSIANHKVTVVGSDASYTKPFSSDYVTISPGQTIDLLFTADQSPNHYYIAAKAYVGGAGIVYDNTTTTAILQYNGNYTSTSIPSLPNLPSHNDTKASVHFTGSLRSLADQNHPVDVPRKITTPLFYTLSVNTLPCLNNSCAGPNGTRLSASVNNISFVDPSID…
Prupe.2G325800.1.p	-10.3148	7.00385	0.00639302	0.883291	Down	XP_020413960.1	transcription factor-like protein DPB isoform X1 [Prunus persica]	67.32	1e-158	sp|Q9FNY2|DPB_ARATH	Transcription factor-like protein DPB OS=Arabidopsis thaliana GN=DPB PE=1 SV=1	At5g03410_2	365	6e-126	KOG2829	E2F-like protein	K	Transcription	K04683|1|0.0|713|pper:18785161|transcription factor Dp-1	-	-	-	MGTRSQQPSRERADVDDDMAGQSVSMSGSVGSPSSRSEQTMATPAGDTNFLRLNHPDVHGDDAGSQGAVGSKKKKRGQRAVAGDKSGRGLRQFSMKVCEKVESKGRTTYNEVADELVAEFADPSNGVTSPDQQQYDEKNIRRRVYDALNVLMAMDIISKDKKEIQWKGLPRTSLNDIEELKTERLGLRNRIEKKASYLQELEEQYVGLQNLIQRNEQLCHSGDALSGGVALPFILVQTRPHATVEVEISEDMQLVHFDFNSTPFELHDDNYVLKAMKFCERPQADDGTQNLTADGGEGCSMSGMYQPQIPLPSMLNTPVRPPTSPPIPGILKARVKHEHHGQ
Prupe.2G326300.1.p	10.4539	7.70288	0.0386795	0.00742937	Up	ONI25911.1	hypothetical protein PRUPE_2G326300, partial [Prunus persica]	80.58	0	sp|P31687|4CL2_SOYBN	4-coumarate--CoA ligase 2 OS=Glycine max PE=2 SV=2	At1g65060	504	3e-177	KOG1176	Acyl-CoA synthetase	I	Lipid transport and metabolism	K01904|1|0.0|706|pper:18786755|4-coumarate--CoA ligase [EC:6.2.1.12]	-	-	-	IFKQFKASNAKLIITHSQFVDKLREAPADGAAPDQNNYPKLGEHFKVVTVDDPPENCLHFSVISEANETELPEVVIDPEDPVALPFSSGTTGLPKGVILTHKSLITSVAQQVDGENPNLYLKEDDVVLCVLPLFHIYSLNSVMLCSLRAGAAVLVMHKFEIGTLLELIQRYRVSVAAVVPPLVIALAKNPMVAQFDLSSIRVVLSGAAPLGKELEEALKSRVPRAVLGQGYGMTEAGPVLSMCLAFAKEPLPSKSGSCGTVVRNAELKVIDAETGCSLGYNQPGEICIRGSQIMKGYLNDAEATATTVDKEGWLHTGDVGFVDDDEEVFIVDRVKELIKFKGFQVCYI
Prupe.2G328300.1.p	1.3648	0.420756	0.0228556	0.257698	Up	XP_007221136.1	uncharacterized protein LOC18787181 [Prunus persica]	-	-	-	-	-	-	-	-	-	-	-	-	-	-	-	MEEDKGRLCRRCKQSYSPASNTPSSCRFHPSFFVCRRHDDQKRYYELGPKDPPYAAKFYDCCGAEDPEASGCTTSFHVSYDDD
Prupe.3G017400.1.p	10.4868	7.87091	0.000892256	0.152892	Up	XP_007215130.1	15.7 kDa heat shock protein, peroxisomal [Prunus persica]	66.44	1e-60	sp|Q9FHQ3|HS157_ARATH	15.7 kDa heat shock protein, peroxisomal OS=Arabidopsis thaliana GN=HSP15.7 PE=2 SV=1	At5g37670	183	2e-60	KOG0710	Molecular chaperone (small heat-shock protein Hsp26/Hsp42)	O	Posttranslational modification, protein turnover, chaperones	K13993|1|1e-102|293|pper:18781679|HSP20 family protein	GO:0009408//response to heat	-	-	MAADSIFGYPLRRFLWSPPIFREWSGSTALMDWLESPNAHIFKINVPGFRKEDIKVQIDEGNVLQIKGEGGKEEAYHAKDTVWHVAERGTGKGDFSREIELPENVKVDQIKAQVENGVLTIVVPKDATPKPSKVRNINITSKL
Prupe.3G019000.1.p	-1.00434	0.207299	0.00128017	0.14196	Down	XP_007217754.1	60S ribosomal protein L7-2 [Prunus persica]	92.08	5e-162	sp|P60040|RL72_ARATH	60S ribosomal protein L7-2 OS=Arabidopsis thaliana GN=RPL7B PE=1 SV=1	At2g01250	448	9e-162	KOG3184	60S ribosomal protein L7	J	Translation, ribosomal structure and biogenesis	K02937|1|2e-176|488|pper:18781943|large subunit ribosomal protein L7e	GO:0002181//cytoplasmic translation;GO:0000463//maturation of LSU-rRNA from tricistronic rRNA transcript (SSU-rRNA, 5.8S rRNA, LSU-rRNA)	GO:0003735//structural constituent of ribosome;GO:0003723//RNA binding	GO:0022625//cytosolic large ribosomal subunit	MGEEVKVVVPESVLKKRKREEEWALAKKQGLEAAKKKNADNRKLIYNRAKQYSEEYKEQEKELIRLKREAKLKGGFYVDPEAKLLFIIRIRGINAIDPKTKKILQLLRLRQIFNGVFLKVNKATLNMLHRVEPYVTYGYPNLKSVKELIYKRGYGKLNKQRTALTDNSIVEQALGKHGIICTEDLIHEILTVGPHFKEANNFLWPFKLKAPLGGLKKKRNHYVEGGDAGNRENYINELIRRMN
Prupe.3G029500.1.p	-10.1596	6.28847	2.62507e-05	0.752103	Down	XP_020414476.1	tyrosine-sulfated glycopeptide receptor 1 [Prunus persica]	57.2	0	sp|Q9C7S5|PSYR1_ARATH	Tyrosine-sulfated glycopeptide receptor 1 OS=Arabidopsis thaliana GN=PSY1R PE=1 SV=1	At1g17240	616	0	KOG0619	FOG: Leucine rich repeat	R	General function prediction only	K04733|1|2e-168|513|zju:107404893|interleukin-1 receptor-associated kinase 4 [EC:2.7.11.1]!K13415|5|1e-159|508|lsv:111882481|protein brassinosteroid insensitive 1 [EC:2.7.10.1 2.7.11.1]		GO:0004674//protein serine/threonine kinase activity;GO:0005524//ATP binding	GO:0016021//integral component of membrane	MSSSLVPMKHDKKKQKVPTIIPTFLPHLFLGQWVFILLLLPCSASAACNQLDQDALLSLALQAPLNLNWSSSTDCCLWEGITCGPDDQGRVVRLWLPRRGLTGVINSSITNLTHLTHLNLSHNSFPGFLPEDLFSSLSSLQVIDLSFNRLIGRLPPSNKISQLQVLNLSSNFFNGTIPSSILAPSVSIFNVSNNSFSGSIPIDNGSNHTSLTFLDLSYNKLNDTIPPGIGLCSKLQVFRAGFNSLSGSLPDEIFNLADLRQLSLPVNSLTGPINDGIMNLTNLQILEIFSNQFSGPIPSQIGSLSRLENLLLHDNNLTGPLPLSLANSTKLSALNLRVNNLTGDLSSFNFSPLQRLTTLDLGNNNFTGEFPKSLYSCKSLTAIRLAGNQLTGQISPEIV…
Prupe.3G037300.1.p	-10.2825	6.84829	2.40931e-05	0.289521	Down	XP_020414822.1	probable serine/threonine-protein kinase yakA isoform X1 [Prunus persica]	-	-	-	-	-	-	-	-	-	-	-	-	-	-	-	MGVSFKVSKTGTRFRPKPPLQSETSVVDDDVSDTSRSSSRAAPRNESNPRMLEGDVIERHGSVPGVSGSSMSSEGLLVSPENEVSFTLNLFPDGYSFGKPSENENAHQGTLQDVPKLLHPYDRTSETLFSAIESGRLPGDILDDIPCKYVDGTLLCEVRDYRKCISEQGPGSPPTEGSLVVNKVCLKMSLENVVKDIPLISDNSWAYGDLMEVESRILKALQPQLHLDPAPKLDRLCKNPVPTKLDLALTSIRRKRLRQMPEVTITSSSKTHGKKVCIDRVPESSNCRLGDSGILPSNMMPHHIHENLTTQNLSPNNMLVRSKNFMSDASVPALPNQSRYHMGVGTPRSMQDHGSGTVANASASPVGQDTMISYADNVSTNVPLHGKREHQDGQMSHLS…
Prupe.3G045300.1.p	-10.1198	6.11868	0.0113289	0.906324	Down	XP_020415013.1	telomere repeat-binding factor 4 [Prunus persica]	46.5	6e-74	sp|F4I7L1|TRB4_ARATH	Telomere repeat-binding factor 4 OS=Arabidopsis thaliana GN=At1g17520 PE=2 SV=2	-	-	-	-	-	-	-	K09422|1|0.0|636|pper:18782232|transcription factor MYB, plant	GO:0006334//nucleosome assembly	GO:0003677//DNA binding	GO:0005634//nucleus;GO:0000786//nucleosome	MGNQKQKWTAEEEEGLLAGVAKHGPGKWKNILKDPEFASVLIHRSNIDLKDKWRNLSVSTSGHGSKDRPRGTKVKNRVSAQHLVRNSAPTASVRPNASPASAPPNSSPASVRPSASPASVCPNASPDAMMDDAVNSAPELKSASQYDPMIFQALSTMKDMNGSDLGAILNFIEQRHEVPVPPNFRRLLGPRLRRLVSQGKLEKVQNGYKLKKDATFGTKTPTLTRNQRDVRPRKLQNSGSMTFTETVQDAAETAAHKLADAEDKSFVAAVAMKEADRISKMTEDNESILQLIEEIYERCSRGEVVALA
Prupe.3G048200.1.p	-10.5288	8.12558	7.90555e-05	0.419817	Down	XP_007215512.1	nucleosome assembly protein 1;4 isoform X1 [Prunus persica]	70.47	6e-161	sp|Q94K07|NAP1C_ARATH	Nucleosome assembly protein 1;3 OS=Arabidopsis thaliana GN=NAP1;3 PE=1 SV=1	At2g19480	451	1e-158	KOG1507	Nucleosome assembly protein NAP-1	BD	Chromatin structure and dynamics;Cell cycle control, cell division, chromosome partitioning	K11279|1|0.0|780|pper:18782323|nucleosome assembly protein 1-like 1	GO:0006334//nucleosome assembly		GO:0005634//nucleus	MSSNKDTFDMSDLGSSLPAAAAALSAEDRAGLVNALKNKLQSLAGQHTDILETLPPSVRKRVEVLREIQGQHDELEEKYFEEKAALEAKYQKLYEPLYTKRYDIVNGVTEVEGVKNEDAPDQEGDKATEEKGVPDFWLTAMKTNEVLSEEITERDEGALKYLKDIKWCRIDKPKGFKLEFFFDPNPYFKNSVLSKIYHMIDEDNEPILEKAIGTEIEWYPGKSLTQKLLKKKPRKGSKNAKPMTKTEDCPSFFNFFSPPQVPDDDDDIDDDTAEELQSQMEQDYDIGSTIRDKIIPHAVSWFTGEAVQGDEFEDLEDDDDDDVDENDDDDDEEEEEDGEDDDDDDDDDEEEEDKGRKKPSAGSKKSGRAQGAEGQQGERPPECKQQ
Prupe.3G054900.1.p	1.45005	0.256796	0.000777157	0.115981	Up	XP_007217752.1	mediator of RNA polymerase II transcription subunit 6 [Prunus persica]	62.01	3e-107	sp|F4IXJ7|MED6_ARATH	Mediator of RNA polymerase II transcription subunit 6 OS=Arabidopsis thaliana GN=MED6 PE=1 SV=1	At3g21350	236	4e-79	KOG3169	RNA polymerase II transcriptional regulation mediator	K	Transcription	K15128|1|0.0|523|pper:18783697|mediator of RNA polymerase II transcription subunit 6	GO:0051123//RNA polymerase II transcriptional preinitiation complex assembly;GO:0006357//regulation of transcription from RNA polymerase II promoter	GO:0001104//RNA polymerase II transcription cofactor activity;GO:0001128//RNA polymerase II transcription coactivator activity involved in preinitiation complex assembly	GO:0070847//core mediator complex;GO:0016592//mediator complex	MATPPMAPPSMEGTPPPMAVQPPGTDMTGICFKDQLWLNSYPLDRNLVFDYFAISPFYDWTCNNEQLRQRSIHPLDPSHLSKMTGTEYSLNEVMEPHLFVFRKQKRDGPEKVTPMLTYYVLDGTIYQAPQLCNVFAARIGRALYYISKAFTTAASKLEKIGYVDSENETAAFESKVTKETIDFKEVKRVDHILQSLQRKLPPAPPPPPFPEGYVPAPTAEAENGPETQQAGEPQQPQMDPIIDQGPAKRMKF
Prupe.3G064100.1.p	10.2796	6.8049	2.55986e-05	0.0518881	Up	XP_007217725.1	uncharacterized protein LOC18783032 [Prunus persica]	-	-	-	-	-	-	-	-	-	-	-	-			GO:0016021//integral component of membrane	MPLPPSSSTQRSPTKMLERALSSRRNALYADEAAAENDAVAADESKTKKHLPISFFTTRITNYLTRTGPVWPCLLLLALVLLLIFSLIFNSRRFVCVSPYDPVSRSGFFGFDGLESDFGSLGVPWCRSKHGKTVEWTSKDLIKGLEVFVPIYETRPIKNNQFGMGFDHSFGLWFIAQWLKPDLMIESGAFKGHSTWVLRQAMPDTPIITLTPRHPEKYLKKGPAYVDGNCTYFSGKDFLDFGSIDWRKLMKKHGITDLGRVLIFFDDHQNELKRVRQALKAGFRHLVFEDNYDTGTGDHYSLRQICDQPYIRGGGHSCFKDSDEARIRSRRKKFWEKAVDIDELCGPGEAWWGVRGYMLDDFNNSKSNKLISFSEHFQNSRFVESILDVYWEVPPVAGP…
Prupe.3G069000.1.p	-10.4765	7.8386	0.0161641	0.400096	Down	XP_007215188.1	60S ribosomal protein L37-3 [Prunus persica]	88.42	2e-58	sp|Q8LEM8|RL373_ARATH	60S ribosomal protein L37-3 OS=Arabidopsis thaliana GN=RPL37C PE=3 SV=1	At1g52300	173	7e-58	KOG3475	60S ribosomal protein L37	J	Translation, ribosomal structure and biogenesis	K02922|1|8e-63|189|pavi:110769545|large subunit ribosomal protein L37e	GO:0006412//translation	GO:0003735//structural constituent of ribosome;GO:0046872//metal ion binding;GO:0019843//rRNA binding	GO:0005840//ribosome	MGKGTGSFGKRRNKTHTLCVRCGRRSFHLQKSRCSACAFPAARKRKYNWSVKAIRRKTTGTGRMRYLRNVPRRFKSGFREGTEAAPRKKGAAATA
Prupe.3G070300.1.p	-10.1278	6.15396	0.000231612	0.728814	Down	ONI15946.1	hypothetical protein PRUPE_3G070300 [Prunus persica]	-	-	-	-	7296381	99.4	1e-23	KOG2497	Predicted methyltransferase	R	General function prediction only	K23040|1|0.0|660|pper:18784357|methyltransferase-like protein 22 [EC:2.1.1.-]	-	-	-	MEKGSLETMGQMNCGDSQEEEQVMSEVHLGCPSGFSGPHISRFTFSIPTELEPRRYNGTSQVEPASTNQMISLDEDGDLLLPRRNKLSTQSSSVSIQHNITSSIPSVGLQVWRAELLLSDFLLHKMFTSSELDGTVALELGAGTDHGNEVLDNCAKNVDLNSELFSHRATVHVRELDWMKPWPPRMTLEESSLGKRYSWTFSEVEAAQEASLLVAADVIYSDDLTDAFFSTLQRLMSSGSEKVLYLALEKRYNFSVDDLNVVANGYSHFRSFLRLEGDADSEALECGSMPCFVGKCIDITQIPQYVREYDRGTDVELWQIEYNKTKL
Prupe.3G075900.1.p	-10.3811	7.33321	2.24912e-05	0.0142012	Down	XP_007216816.1	probable 2-oxoglutarate-dependent dioxygenase AOP1 [Prunus persica]	54.31	1e-122	sp|Q945B6|AOP1L_ARATH	Probable 2-oxoglutarate-dependent dioxygenase AOP1.2 OS=Arabidopsis thaliana GN=AOP1.2 PE=2 SV=1	At1g52820	440	4e-156	KOG0143	Iron/ascorbate family oxidoreductases	QR	Secondary metabolites biosynthesis, transport and catabolism;General function prediction only	K04124|1|5e-33|129|tcc:18588669|gibberellin 3beta-dioxygenase [EC:1.14.11.15]!K05282|3|3e-31|124|ppp:112280324|gibberellin-44 dioxygenase [EC:1.14.11.12]!K04125|5|2e-30|122|nnu:104585673|gibberellin 2beta-dioxygenase [EC:1.14.11.13]		GO:0046872//metal ion binding;GO:0051213//dioxygenase activity;GO:0016491//oxidoreductase activity	-	MGSETPLRLPVIDFSNQSLTPGTREWNTVRAQVHNALEEYGCFEALFTKVPSHIRKSIFQSIEDLLDLPLQTKLKNVSRKPYRGYAGQLPMMPLYESMGIDGANVYEQVQSLANTLWPQGNPSFCKTIQSFTEKVSELDQIIRRMILESLGLKEYLEEHLNSTDYLLRVMKYKAPQTNETKLGLPPHTDKNIVTILYQNQVDGLEVQTKDGKWINVKPSSDSFIALIGESLHAWTNGRLHSPIHRVMMNGNEIRYSTGLFSAPKEGYIIKAPNEVVDEEHPLLFKPYEHAQFIAFCNSEAGQRGPFSLKTFCGVQDLTLST
Prupe.3G080000.1.p	1.31387	0.492221	0.044388	0.314148	Up	XP_007215094.1	uncharacterized RNA-binding protein C17H9.04c [Prunus persica]	-	-	-	-	At3g15680	203	1e-67	KOG4198	RNA-binding Ran Zn-finger protein and related proteins	R	General function prediction only	K15407|1|5e-21|93.2|csl:COCSUDRAFT_65423|queuine tRNA-ribosyltransferase subunit QTRTD1 [EC:2.4.2.29]		GO:0046872//metal ion binding;GO:0003729//mRNA binding	-	MSRPGDWNCRSCQHLNFQRRDSCQRCGDSKSGVDFGGFGGRGGGGSSFGFMSTGSDVRPGDWYCAAANCGAHNFASRSSCFKCGAFKDDSAAGGGGGGFDSDMPRSRGFGLGLGGGAGGGARPGWKSGDWICTRLGCNEHNFASRMECFRCNAPRDSY
Prupe.3G096500.1.p	10.1613	6.2734	0.0193458	0.000118828	Up	XP_020416130.1	Golgi SNAP receptor complex member 1-1 [Prunus persica]	83.48	8e-138	sp|Q9LMP7|GOS11_ARATH	Golgi SNAP receptor complex member 1-1 OS=Arabidopsis thaliana GN=GOS11 PE=2 SV=1	At1g15880	385	2e-137	KOG3208	SNARE protein GS28	U	Intracellular trafficking, secretion, and vesicular transport	K08495|1|4e-166|460|pper:18783350|golgi SNAP receptor complex member 1	GO:0015031//protein transport;GO:0006888//ER to Golgi vesicle-mediated transport		GO:0005801//cis-Golgi network;GO:0016021//integral component of membrane;GO:0000139//Golgi membrane	MEVPSSWDALRKQARKIEAQLDELMHSYRKFVSAKGTAKFDTAENDLESGIDRLLKQLQQVNSQMQAWVSSGGSEMVSHTLTRHQEIFQDLTQEFYRLRSSFRAKQEHASLLEDFREFDRTRVDLEDGVGSAENALLKEHAAVSRNTGQMDTVISQAQATLGTLVLQRSTFGGINSKLSNIGSRLPSVNHILAAIKRKKSMDTIILSLVASVCTFLIFIYWLTK
Prupe.3G101600.1.p	10.4668	7.74843	2.24812e-05	0.000118828	Up	ONI16489.1	hypothetical protein PRUPE_3G101600 [Prunus persica]	66.84	0	sp|Q9FI78|HST_ARATH	Shikimate O-hydroxycinnamoyltransferase OS=Arabidopsis thaliana GN=HST PE=1 SV=1	-	-	-	-	-	-	-	K13065|1|0.0|647|pmum:103328213|shikimate O-hydroxycinnamoyltransferase [EC:2.3.1.133]		GO:0016747//transferase activity, transferring acyl groups other than amino-acyl groups	-	MAVNVRVRESMVVKPEEETPKRALWISDLDVVISRTHVGSVYFYRRPNVFKCSLAKALVPFYPVAGRLKLNDEGRIEIDCNAEGVLFLVAETDSVLDDFGDFAPTLEFRKLIPAVDYSAGISSYPLLVLQVTYFKCGGVSLGVGLEHRVADGVSGLHFVNTWSDIARGCDITIPPFIDRTLLRARDPPQPAFHHIEYQPDPPIKTPPRSTNASSVESTTVSIFRLTLEQLNMLKAKSKEDGNTIEFSTFEMLAGHVWRCASNARQLPDDQETKLHVALDGRSRLEPPLQPGFFGNVVFAAAPIAAAGNLKSKPTWYAARCVHDAVVRMDNDYLRSALDYLKLEPDLSSLVRGAHTFRSPRLGIASWARLPIQ
Prupe.3G108200.1.p	-10.2363	6.63365	0.01063	0.906429	Down	XP_007215849.2	protein trichome birefringence-like 43 [Prunus persica]	55.74	8e-151	sp|Q6DR10|TBL43_ARATH	Protein trichome birefringence-like 43 OS=Arabidopsis thaliana GN=TBL43 PE=2 SV=1	-	-	-	-	-	-	-	-	-	-	-	MHLSYTCTLLHYIICAYIPCELHQPSNLSFSDLMDAFAVGATTIALLVLSVLYQPVHGGLVGSDINGCDVSHGNWVFDDSYPLYAAPSCPFIENEFDCIKNGRPDKGYLKYRWQPSACNLPKFDGSRILTEFRGKSIMFIGDSLSLNQWQSLTCMLHTAVPKAKYTLVRTGGLSTFTFPEYNLKVLFSRNAFIVDIVASPGGRVLKLDSISTQDEELWLGIDVLIFNTWHWWLHTGRKQPWDLIRVGKQTYTDMNRLVAYEKALNTWASWVNSNVDPNKTKVFFQGVSPDHSNATEWSDPKAINCNAQSKPLPGPDYPGKAHPAEEVVEKVLRSMSKTVHLLDVTTLSQLRKDGHPSVYGLGGHRGMDCSHWCLAGVPDTWNVLLYAALTQN
Prupe.3G148300.1.p	10.6363	8.73023	0.0288619	0.152892	Up	XP_007215865.1	thaumatin-like protein 1 [Prunus persica]	93.09	1e-171	sp|P83332|TLP1_PRUPE	Thaumatin-like protein 1 OS=Prunus persica PE=2 SV=1	-	-	-	-	-	-	-	K04733|1|4e-70|231|boe:106327123|interleukin-1 receptor-associated kinase 4 [EC:2.7.11.1]	-	-	-	MMMMKSQAALLGLTTLAILFFSGAHAAKITFTNKCSYTVWPGTLTGDQKPQLSLTGFELATGISNSVDAPSPWSGRFFGRTRCSTDASGKFSCATADCGSGQVSCNGNGAVPPATLVEITIAENGGQDFYDVSLVDGFNLPMAVAPQGGTGECKASTCPADVNAVCPAELQVKGSDGSVIACKSACLALNQPQYCCTPPNDKPETCPPTEYSKIFKDQCPQAYSYAYDDKSSTFTCSARPDYLITFCP
Prupe.3G156500.1.p	-1.92225	0.537891	0.00725458	0.185828	Down	XP_007215704.1	bifunctional epoxide hydrolase 2 isoform X1 [Prunus persica]	-	-	-	-	At3g51000	198	3e-61	KOG4178	Soluble epoxide hydrolase	I	Lipid transport and metabolism	K08726|1|1e-132|386|dzi:111281598|soluble epoxide hydrolase / lipid-phosphate phosphatase [EC:3.3.2.10 3.1.3.76]!K10144|2|4e-79|247|mdm:103405733|RING finger and CHY zinc finger domain-containing protein 1 [EC:2.3.2.27]		GO:0003824//catalytic activity	-	MEQIQHRHVQVRGVKLHVAEIGSGPKVVLFLHGFPEIWYTWRHQMVAVANKGHRAIAIDFRGYGLSEQPAEPEKATFKDLIDDVVALLDSLSIDKAVLVGKDFGAFPAYVIPALHPQRVSGMITVGVPFMQPDASPVQFHLLPKGFYMSRLKEPGRAEADFGRFDVKTVIRNIYILFSGSELQVAADDQEIMDLVDTATPLPPWFSEEDLAAYASLYEKSGLHFPLQIPYRSRRSSEDYHLTDPKISAPSLLIMGEKDYFLKFPGVEDYLSTGAVKHFVPDLDINFIAEGTHFVQEQFPEQVNQLITSFLDKHGI
Prupe.3G156900.1.p	10.2576	6.70179	2.59924e-05	0.0373852	Up	XP_007215837.1	probable polyol transporter 4 [Prunus persica]	74.19	0	sp|Q0WUU6|PLT4_ARATH	Probable polyol transporter 4 OS=Arabidopsis thaliana GN=PLT4 PE=2 SV=1	At2g20780	761	0	KOG0254	Predicted transporter (major facilitator superfamily)	R	General function prediction only	K08150|1|3e-87|281|dzi:111279701|MFS transporter, SP family, solute carrier family 2 (myo-inositol transporter), member 13	GO:0046323//glucose import;GO:0035428//hexose transmembrane transport	GO:0005355//glucose transmembrane transporter activity;GO:0005351//sugar:proton symporter activity	GO:0016021//integral component of membrane	MGLVGVGETGNGEMGLSSVALGTKNKYKRMDSQLPDEDEDASQHQLQEKRSKKTRKYVLACAIFASLNSVLLGYDVGVMSGAIIFIQEDLKITEVQEEVLVGILSIVSLFGSLAGGKTSDMIGRKWTMALAAVVFQAGAGVMVFAPSFEILMIGRLLAGIGIGFGVMIAPVYIAEISPTIARGSLTSFPEIFINLGILLGYVSNYAFSGLPAHINWRIMLGVGILPSVFIGFALFIIPESPRWLVIQNRVDEARSVLLKTNENESEVEDRLNEILVAADTSSGGKYEEKSVTRELLSPSPALRRMLITGFGIQCFQQITGIDATVYYSPEIFREAGIEDKTNLLAATVAVGVTKTVFIMVAILLIDKIGRKPLLYVSTIGMTACLFSLAFTLTFLGKGQ…
Prupe.3G165600.1.p	-10.6079	8.58234	1.92005e-05	5.50606e-05	Down	XP_007215139.1	centromere protein V [Prunus persica]	-	-	-	-	At5g16940	218	4e-74	KOG4192	Uncharacterized conserved protein	S	Function unknown	-	GO:0008152//metabolic process	GO:0016846//carbon-sulfur lyase activity	-	MDSEMVAHEGGCHCKKVRWRVQAPTGVVAWSCNCSNCSMRGNTHFIVPADRFELLGDSEQFLTTYSFGTHTAKHKFCKVCGITSFYYPRSNPDGVSITFTCVDPGTLTHIEVKYYDGKNWETSHNQTGIASQSKG
Prupe.3G188100.1.p	2.32732	0.456196	0.00376512	0.163788	Up	XP_020416652.1	carnosine N-methyltransferase isoform X1 [Prunus persica]	-	-	-	-	At2g32160	478	2e-166	KOG2798	Putative trehalase	G	Carbohydrate transport and metabolism	K19787|1|0.0|1032|pmum:103329018|carnosine N-methyltransferase [EC:2.1.1.22]	-	-	-	MSSVRAAEREMHRGEDEDDERRRQRKLEEALEVKSLRRIISAYLNYPEAAEEDVRRYERSFKILPPSHKALLSHYPLKFQRLRRCISVNSYFIFSMLQAFEPPLDLSQDMDVRDGPHLERVSYNHDVSGVKSVSSSQSNSTSERMHISNSDQACCGEGSSAVCSTPIGVTTKKEVNNEGHCDCITERHTSGREYNREMHNCDGNDAIDSNGDVSSPTRTWLDPSLQLHVPLVDVDKVRCIVRNIVRDWAAEGQKERDQCYKPILEELDSLFADRSKESPPACLVPGAGLGRLALEISCLGFISQGNEFSYYMMICSSFILNHSRTAGEWTIYPWIHSNCNSLSDSDQLRPVSVPDIHPASAGITEGFSMCGGDFVEVYNDPNQVGVWDAVVTCFFIDTA…
Prupe.3G198000.1.p	10.4022	7.43411	0.0404879	0.000118828	Up	XP_007215589.2	alpha-1,6-mannosyl-glycoprotein 2-beta-N-acetylglucosaminyltransferase [Prunus persica]	64.45	0	sp|Q9FT88|MGAT2_ARATH	Alpha-1,6-mannosyl-glycoprotein 2-beta-N-acetylglucosaminyltransferase OS=Arabidopsis thaliana GN=GNT2 PE=1 SV=1	At2g05320	576	0	KOG2791	N-acetylglucosaminyltransferase	G	Carbohydrate transport and metabolism	K00736|1|0.0|891|pper:18783149|alpha-1,6-mannosyl-glycoprotein beta-1,2-N-acetylglucosaminyltransferase [EC:2.4.1.143]	GO:0009312//oligosaccharide biosynthetic process	GO:0008455//alpha-1,6-mannosylglycoprotein 2-beta-N-acetylglucosaminyltransferase activity	GO:0005795//Golgi stack;GO:0016021//integral component of membrane	MANIKKNRLKDEVAFRRFLPLVSITLLGVFLLMFLLRINSNFATPSSDDFSQVLTNRSHARHMLSLPKQTEFSLQLEKRNQMPPRNLDLYPSLDKDHITIVLYVHNRPQYLKAAVDSLSRVVGINETLLIVSHDGYFEEMNKIVEGIRFCQVKQIFAPFSPHVFPNSFPGVSPTDCKEKDDATKKQCKGTPDQYGNHRSPKIVSLKHHWWWMMNTVWDGLKETKDHSGHILFIEEDHYIYPNAYRNLQILTELKPQKCPHCYAANLAPCDVNARGEGWDSLIAERMGNVGYTFNRTVWRKIHRKTTEFCFFDDYNWDITMWATVYPSFGNPVFTLRGPRTSAVHFGKCGLHQGQGEARACIDNGMVNFQVEEIDTVANINSDWEVRVFEHQPGYKAGFK…
Prupe.3G223200.1.p	-10.3978	7.42577	0.0218171	0.656141	Down	XP_007215752.1	xyloglucan endotransglucosylase/hydrolase protein 9 [Prunus persica]	73.63	5e-165	sp|Q8LDW9|XTH9_ARATH	Xyloglucan endotransglucosylase/hydrolase protein 9 OS=Arabidopsis thaliana GN=XTH9 PE=2 SV=2	-	-	-	-	-	-	-	K08235|1|0.0|623|pper:18782384|xyloglucan:xyloglucosyl transferase [EC:2.4.1.207]	GO:0042546//cell wall biogenesis;GO:0071555//cell wall organization;GO:0010411//xyloglucan metabolic process	GO:0016762//xyloglucan:xyloglucosyl transferase activity;GO:0004553//hydrolase activity, hydrolyzing O-glycosyl compounds	GO:0005618//cell wall;GO:0048046//apoplast	MAIPAFKIMSLFLSVFVGFALVGLVSSAKFDELFQPTWAFDHFTHEGELLHMKLDNFSGAGFQSKNKYLFGKVSLQIKLVEGDSAGTVTAFYMSSDGPSHNEFDFEFLGNTTGEPYSVQTNIYVNGVGNREQRLNLWFDPTTEFHSYSIFWNQRQVVFLVDETPIRVHTNMENKGVPFPKDQAMGVYSSIWNADDWATQGGRVKTDWSHAPFIASYKGFEINACECPVSLAAADNAKKCSSSGDQKYWWDEPTLSALNLHQNHQLVWVKAHHMFYDYCTDSARFPVTPLECVHHRH
Prupe.3G232700.1.p	-10.2215	6.56529	0.0078222	0.133696	Down	XP_007217258.1	uncharacterized protein LOC18782137 [Prunus persica]	-	-	-	-	-	-	-	-	-	-	-	-	GO:0008152//metabolic process	GO:0005542//folic acid binding;GO:0016740//transferase activity	-	MDQSPACKDKKKKTIDQSMLLCCKLYISESRNHAALDAIERAARLDPESVIVNKFEDRAYNRVRYTIVSYVMHDSTGSAIYSPLQQTVMAMAEAAFGAINLEQHSGAHPRLGVVDDIVFHPLARASLDEAAWLAKAVAVDIGNRFQVPVYLYAAAHPTGKALDTIRRELGYYRPNFMGSQWAGWTMPEILHEKPDEGPTSICPARGISMIGARPWVALYNIPILSTDVAATRRIARMVSARGGGLPTVQTLGLVHGEDSTEIACMLLEPNQIGGDRVQNHVEMLAAQEGLDVEKGYFTDHSPDMIIEKYMKLTSEDTN
Prupe.3G236200.1.p	2.63408	0.47363	0.00511848	0.169711	Up	XP_007215745.1	LOB domain-containing protein 41 [Prunus persica]	60.93	2e-115	sp|Q9M886|LBD41_ARATH	LOB domain-containing protein 41 OS=Arabidopsis thaliana GN=LBD41 PE=2 SV=1	-	-	-	-	-	-	-	K13945|1|2e-08|57.8|csat:104753355|LOB domain-containing protein 29!K21994|5|5e-08|57.8|lang:109350504|LOB domain-containing protein 18	-	-	-	MRMSCNGCRILRKGCSENCSIRPCLQWIKSPESQANATVFLAKFYGRAGLMNLINAGPEHLRPAIFRSLLYEACGRIVNPIYGSVGLLWSGSWQLCQAAVEAVLKGQPITSITSEAAADGHGPPLKAYDIRHVSKDENSAASNEPKQAKTRYRFKRSVVKPKASKVGSGSGSGADDSAKPSCAGCCADEFNRSTSHESSLSHQSEAAANVDGESKETESMVSSETAEAELLFRPEPESARKRSEPVQEGELALELTLGLEPQSRAHHVVPVKKRRIDAYGLGGRSSADDGACKMELGLDLVA
Prupe.3G242800.1.p	10.3028	6.91805	0.0132435	0.000628756	Up	XP_007215463.1	protein FLX-like 2 [Prunus persica]	60.24	2e-121	sp|Q84TD8|FLXL2_ARATH	Protein FLX-like 2 OS=Arabidopsis thaliana GN=FLXL2 PE=1 SV=1	-	-	-	-	-	-	-	K00161|1|2e-35|134|gra:105784008|pyruvate dehydrogenase E1 component alpha subunit [EC:1.2.4.1]!K13207|3|4e-25|110|smo:SELMODRAFT_414635|CUG-BP- and ETR3-like factor!K03257|5|5e-20|96.7|nto:104095355|translation initiation factor 4A	-	-	-	MGSKGRIPPAHLRRPLPGPDPFGPGIRPPHGAYPPFDMLPPPQVMEQKLAAQHVEMERLVTENQRLAATHGTLRQELAGAQHELQILHAQIGAIKSEREQQMRGLVDKIAKMEAELKSAEPVKLELQQAGAEAQNLVVSRQELIAKVQQLSQDLQRAHTDVQQIPALVSQLDSLRQEYQHCRATYDYEKKLYNDHLESLQVMEKNYVTMAREVEKLRAELLNNSNVDRRTGAPYYGTPGNNENESTGHAIGQNAYEDSYGVPQGRAPFPPPAAAAGGGATAAGTPPLVGAQPGPPGRTVYDAPRGPGYDASGGSGYDAQRGPGYDAQRGAPYDAQRPGYDVQRPNYEVQRGPGYDPSRGVNYDAQSRGAAGPQGHMPTSNAPYGSATPPARGGSGYEAP…
Prupe.3G246600.1.p	-1.18113	0.339559	0.0083388	0.190064	Down	XP_007215352.1	sodium-coupled neutral amino acid transporter 2 [Prunus persica]	74.07	0	sp|Q9LI61|AVT6A_ARATH	Amino acid transporter AVT6A OS=Arabidopsis thaliana GN=AVT6A PE=2 SV=1	At3g30390	700	0	KOG1305	Amino acid transporter protein	E	Amino acid transport and metabolism	K14207|1|0.0|919|pper:18783776|solute carrier family 38 (sodium-coupled neutral amino acid transporter), member 2			GO:0016021//integral component of membrane	MTIGNLAPKKEKKSRKSKGVIDENAPLLPKGQEDVVFDEFNGASFTGAVFNLSTTIVGAGIMALPATMKVLGLVLGISMIIFMAFLTEASIELILRFSRAGKSASYGGLMGEAFGKYGKVLLQISVLVNNLGVLIVYMIIIGDVLSGTSSSGVHHAGVLEGWFGEHWWTGRAIILLVTTLGIFAPLSCFKRIDSLSFTSALSVALAVVFLVITVGITVVKLFNGSIAMPRLLPDVTDVSSFFKLFTVVPVLVTAYICHYNVHSIHNELEDSTQIRGVVQTSLALCSSVYIMTSLFGFLLFGDGTLDDVLANFDTNLGIPYSSVLNDAVRVSYAAHLMLVFPIVFFPLRLNLDGLLFPSARPLVLDNMRFALVTIGLISVIFLGANFIPSIWDAFQFTGA…
Prupe.3G248800.1.p	10.1564	6.2476	2.78822e-05	0.000118828	Up	XP_007217644.1	AUGMIN subunit 5 [Prunus persica]	74.97	0	sp|Q9FMB4|AUG5_ARATH	AUGMIN subunit 5 OS=Arabidopsis thaliana GN=AUG5 PE=1 SV=1	-	-	-	-	-	-	-	-	GO:0051225//spindle assembly		GO:0070652//HAUS complex	MQGSSQSSVAQPEAILQWLQKEMGYRPLGPYSAASKSQLPSIDSLRKICRGNMIPIWNFLITRVKSENTVKNIRRNITVHGGGSGGGDSGALVKSGKEEGVRSKGGRRKEKLGEGSSAAETREAALQERDLASKEVEKLRNIVKRQRKDLKARMLEVSRAEAERKRMLDERSKKRHKQVMLDAYYQQCDEAEKIFAEYHKRLRYYVNQARDAQRSGVDSSLELVNSFSSSSEKEAVYSTLKGSKAADDVLLIETTRERNIRKACESLAAHMIEKIRNSFPAYEGSGVHLNPQLETAKLGFDFDGELPDEVRAAIVNGLKSPPQLLQAITSYTSRLKSLISREIEKIDVRADAETLRYKYENNRVIDVSSPDVSSPLHYQLYGNGKIGVDAPSRGTQLLE…
Prupe.3G250200.1.p	10.5471	8.22765	0.00215192	0.152892	Up	XP_007215204.1	uncharacterized protein LOC18782260 [Prunus persica]	-	-	-	-	-	-	-	-	-	-	-	-			GO:0016021//integral component of membrane	MGRWVRPEVYPLMAAMTFVTSLCAFQLTRNVFLNPDVRIDKAKRGMGVLENKEEGEKYAEHGLRKFLRTRPPEIMPTINQFFSQDE
Prupe.3G262100.1.p	-10.1488	6.24162	2.64489e-05	0.000120706	Down	XP_007215541.1	probable WRKY transcription factor 4 [Prunus persica]	51.79	1e-148	sp|Q9XI90|WRKY4_ARATH	Probable WRKY transcription factor 4 OS=Arabidopsis thaliana GN=WRKY4 PE=1 SV=2	-	-	-	-	-	-	-	K08819|1|2e-104|341|brp:103870946|cyclin-dependent kinase 12/13 [EC:2.7.11.22 2.7.11.23]!K18835|4|1e-96|309|han:110873546|WRKY transcription factor 2	GO:0006351//transcription, DNA-templated	GO:0003700//DNA binding transcription factor activity;GO:0043565//sequence-specific DNA binding	GO:0005634//nucleus	MTEKEKRCLLDIASMAKNQDSERVSVSAPPQPQRPVITLPPRPSAESLFSGGSGASPGPMTLVSSFFPDTYPDSEYRSFSQLLAGAMGSPMGSTRPIQFNENPVDGSAQLEGGSENGGENKSGFKQSRPMNLMVARSPLFTVPPGLSPSGLLNSPGFFSPPSPFGISHQQALAQVTAQAALAQSRMHMQAEYQPSSVGAPTEPQAYHPSVMPNEASQQQTLPSTSDHRSSAGQSSEASHSDRKYQPSSVATDRPADDSYNWRKYGQKQVKGSEYPRSYYKCTHLNCPVKKKVERSPNGEITEIIYKGQHNHEAPQPKRGKDGGDLNGHLHSQPRPENGLQRLVGDSNGSSENIASHSMLERHQESTQAAPGQLPGASDSEELRDGEIREEGDADEPNPK…
Prupe.3G268200.1.p	-1.14534	0.189887	0.000312201	0.0724769	Down	XP_007217809.1	60S ribosomal protein L34 [Prunus persica]	95.83	5e-80	sp|P40590|RL34_PEA	60S ribosomal protein L34 OS=Pisum sativum GN=RPL34 PE=2 SV=1	At1g26880	224	4e-77	KOG1790	60s ribosomal protein L34	J	Translation, ribosomal structure and biogenesis	K02915|1|5e-82|239|pavi:110760886|large subunit ribosomal protein L34e	GO:0006412//translation	GO:0003735//structural constituent of ribosome	GO:0005840//ribosome	MVQRLTYRTRHSYATKSNQHRIVKTPGGKLVYQTTKKRASGPKCPVTGKRIQGIPHLRPAEYKRSRLSRNRRTVNRAYGGVLSGGAVRERIIRAFLVEEQKIVKKVLKIQKAKEKQAGKN
Prupe.3G270900.1.p	1.9267	0.394433	0.00178394	0.14196	Up	XP_007215778.1	plant cysteine oxidase 2 [Prunus persica]	65.52	5e-122	sp|Q8LGJ5|PCO2_ARATH	Plant cysteine oxidase 2 OS=Arabidopsis thaliana GN=PCO2 PE=1 SV=1	At5g39890	350	1e-121	KOG4281	Uncharacterized conserved protein	S	Function unknown	K10712|1|0.0|590|pper:18783973|cysteamine dioxygenase [EC:1.13.11.19]	GO:0018171//peptidyl-cysteine oxidation;GO:0009061//anaerobic respiration;GO:0070483//detection of hypoxia	GO:0016702//oxidoreductase activity, acting on single donors with incorporation of molecular oxygen, incorporation of two atoms of oxygen	GO:0005634//nucleus;GO:0005829//cytosol	MGIETTTPNRKGNKEIYGLPVETNSHNKTRKCRRRHRKMSPVQRLYQTCKDVFSFCGAGIVPSPEDIQRLRSVLDTMKPADVGLTPELPYFRMTVARRTPAITYLHLHECEKFSMGIFCLPPSGVLPLHNHPGMTVFSKLLFGTMHIKSYDWVADATEDKSTSANPSPATPPGVRLAKVKVDADFTAPCNTSILYPADGGNMHCFTAVTACAVLDVLGPPYSDPDGRHCQYYLDFPFSHFSVDGVSVAEEEKEGYAWLQEIEKPEDLAVDGAKYRGPKIVEN
Prupe.3G271500.1.p	10.4034	7.42249	0.000490496	0.000550899	Up	XP_007216981.1	FACT complex subunit SSRP1 [Prunus persica]	84.34	0	sp|O04235|SSRP1_VICFA	FACT complex subunit SSRP1 OS=Vicia faba GN=SSRP1 PE=2 SV=1	At3g28730	973	0	KOG0526	Nucleosome-binding factor SPN, POB3 subunit	KLB	Transcription;Replication, recombination and repair;Chromatin structure and dynamics	K09272|1|0.0|1324|pper:18783422|structure-specific recognition protein 1	GO:0006281//DNA repair;GO:0006355//regulation of transcription, DNA-templated;GO:0006260//DNA replication;GO:0006351//transcription, DNA-templated	GO:0003677//DNA binding	GO:0005634//nucleus;GO:0005694//chromosome	MTDGHLFNNISLGGRGGTNPGQLKIYSGGISWKKQGGGKVVEVDKADIVGATWMKVPRTNQLGVRIKDGLYYKFIGFRDQDVTSLTNYFQNTCGLTPEEKQLSVSGRNWGEVDLSGNMLTFLVDTKQAFEVSLADVSQTQLQGKNDVILEFHVDDTTGANEKDSLMEISFHIPNSNTQFVGDENRPPAQVFRDKIMSMADVGAGGEDAVVTFESIAILTPRGRYSVELHLSFLRLQGQANDFKIQYSSVVRLFLLPKSNQPHTFVVVTLDPPIRKGQTLYPHIVLQFETDYVVQSELSMSEELMNTKYKDKLELSYKGLIHEVFTTILRGLSGAKVTKPGKFRSCQDGYAVKSSLKAEDGVLYPLEKSFFFLPKPPTLILHDQIDYVEFERHGAGGSNM…
Prupe.3G277500.1.p	10.3968	7.38111	2.36e-05	0.152892	Up	XP_020416283.1	metalloendoproteinase 2-MMP [Prunus persica]	41.98	1e-79	sp|O04529|2MMP_ARATH	Metalloendoproteinase 2-MMP OS=Arabidopsis thaliana GN=2MMP PE=1 SV=1	At1g70170	246	2e-79	KOG1565	Gelatinase A and related matrix metalloproteases	OW	Posttranslational modification, protein turnover, chaperones;Extracellular structures	K01388|1|1e-130|378|dzi:111292939|matrix metalloproteinase-1 (interstitial collagenase) [EC:3.4.24.7]!K01402|2|5e-127|369|egr:104426224|matrix metalloproteinase-8 (neutrophil collagenase) [EC:3.4.24.34]!K07999|5|1e-108|322|csv:101215525|matrix metalloproteinase-20 (enamelysin) [EC:3.4.24.-]	-	-	-	MASKSHLCLLACTLLFILLSLPSHANSSETHNQKTSPFEFLEHLKGFQNGDKVPGIQDLKKYLGRFGYLSSNNNQTTDDFDDQLASAIKTYQLNYNLKTTGILDAQTVSNMMMPRCGVPDIINGTSSMRSGKQSHPPPHHHHKGHTVAHYTFFPGKPKWPASKYHLTYAFLRGTPTAAKGPVARAFNTWAAHTQFKFSQARRNQKPDLTVSFHRRSHGDGHPFDGPGGILAHSFAPKDGRFHYDADEKWSVGVVRGAFHLETVALHEIGHLLGLGHSSVRRAIMYPTISSGETKGLNRDDIQGIKALYHA
Prupe.3G289900.1.p	1.01914	0.216318	0.0015191	0.14196	Up	XP_007214969.1	probable galactinol--sucrose galactosyltransferase 5 [Prunus persica]	67.72	0	sp|Q9FND9|RFS5_ARATH	Probable galactinol--sucrose galactosyltransferase 5 OS=Arabidopsis thaliana GN=RFS5 PE=1 SV=1	-	-	-	-	-	-	-	K06617|1|0.0|1599|pper:18782253|raffinose synthase [EC:2.4.1.82]		GO:0003824//catalytic activity	-	MAPSLTKAANGDTNLADGSKPSSCPFTLEKSNFKANGHVILSDVPENITLIPSPYSTAGCFVGFDVAEPNSRHVVPVGQLKDIRFMSIFRFKVWWTTHWVGSNGRDLENETQIVILESSDAGRPYVVVLPLLEGSFRACIQPGNSDFLDICVESGSTREVSNSFQSVLYLQAGDDPFALVKEAVKVARDHLGTFQLLEDKTPPGIVDKFGWCTWDAFYLTVHPHGVIDGVRKLVEGGCPPGLVLLDDGWQSIGHDSDPITKEGMNQAVAGEQMPCRLLKFEENYKFRDYVSPNGGASGKGMGAFIKDLKEEFKSVDYVYVWHALCGYWGGVRPNVPGMPDAVVVEPTLSPGLLKTMEDLAVDKIVATGVGLVPPEVVDQMYEGLHSHLKSVGIDGVKVD…
Prupe.3G301000.1.p	-10.5314	8.13853	2.02536e-05	0.00299954	Down	XP_020414459.1	lysine histidine transporter 1 isoform X1 [Prunus persica]	79.78	0	sp|Q9FKS8|LHT1_ARATH	Lysine histidine transporter 1 OS=Arabidopsis thaliana GN=LHT1 PE=1 SV=1	At5g40780	750	0	KOG1303	Amino acid transporters	E	Amino acid transport and metabolism	K14209|1|0.0|555|brp:103868752|solute carrier family 36 (proton-coupled amino acid transporter)!K15015|2|0.0|548|adu:107468917|solute carrier family 32 (vesicular inhibitory amino acid transporter)			GO:0016021//integral component of membrane	MGVQAPTDQNSSVPVSSNKSQIDERPEKQSQIDEQLKRQKEIDDWLPITSSRNAKWWYSAFHNVTAMVGAGVLSLPYAMSNLGWGPGTVILVLSWVITLFTLWQMVEMHEMVPGKRFDRYHELGQHAFGEKLGLWIVVPQQLICEVGVDIVYMVTGGKSLQKIHKIARKDKDPIKLTYFIMIFASAHFVLAHLPNFNSISGVSLAAAVMSLSYSTIAWTASVHKGVQPDVEYGYLAHSTSGTVFNFFTALGDVAFAYAGHNVVLEIQATIPSSPEKPSKKPMWRGVVIAYIVVALCYFPVAFIGYYIFGNKVEDNILISLEKPEWLIITANMFVVIHVIGSYQLYAMPVFDMIETLLVKKLHFRPTTMLRFISRNTYVAFTMFVGITFPFFGGLLGFFG…
Prupe.3G309900.1.p	-10.3513	7.18496	0.000145381	0.653972	Down	XP_020415811.1	uncharacterized protein LOC18784150 [Prunus persica]	-	-	-	-	-	-	-	-	-	-	-	K15889|1|1e-06|52.0|mdm:103411406|prenylcysteine alpha-carboxyl methylesterase [EC:3.1.1.-]	-	-	-	MNPLFLLVISSLFFQSVYLGVEAAKAKPVKGTTRSQIIVMGLVYCDICSNNTFSRHSYFIPGAEVKIDCIFQAVSPRTSEHISFSVNRTTNKYGVYKLEIPAVEGIKCAQDSAIVSSCQATLMWSSSSVCNVPGYKSTSDEITVKSKQANLCIYSLNALNFRPSKREITLCGKKN
Prupe.3G310500.1.p	-1.16375	0.286929	0.00365438	0.163788	Down	XP_007215511.1	glycerophosphodiester phosphodiesterase GDPD1, chloroplastic [Prunus persica]	65.03	0	sp|Q9SGA2|GDPD1_ARATH	Glycerophosphodiester phosphodiesterase GDPD1, chloroplastic OS=Arabidopsis thaliana GN=GDPD1 PE=1 SV=1	At3g02040	509	0	KOG2421	Predicted starch-binding protein	R	General function prediction only	K18696|1|0.0|793|pper:18782987|glycerophosphodiester phosphodiesterase [EC:3.1.4.46]	GO:0006629//lipid metabolic process;GO:0046475//glycerophospholipid catabolic process;GO:0030643//cellular phosphate ion homeostasis	GO:0008889//glycerophosphodiester phosphodiesterase activity;GO:0008081//phosphoric diester hydrolase activity	GO:0005623//cell	MALKAVHVSDVPNLDQVPENASLALYSTRFSKGVEMGRVASRIPKFLVIGHRGNGMNALQSSDRRMRAIKENSIASFNSAANFPIDFVEFDVQVTKDDCPVIFHDNFILSEENGTVCERRVTELCLSEFLCYGPQREAGKEGKTLLRKTKDGKIVRWDVEKDDSLCTLQEAFEQVEPSLGFNIELKFDDYVVYEQDYLINVFQAILQVVFNYAKDRPIIFSSFQPDAALIVKKLQSTYPVFFLTNGGTELYYDVRRNSLEEAMKLCLEGGLQGIVSEVKGVFRNPGALTKIKDAKLSLLTYGKLNNVAEAVYMQYLMGIEGVIVDLVQEITESVSDMIKPTTAEDGGDKNLLEGDGKMQMQVKSKPEFSQRELSFLLKLIPELIQL
Prupe.4G004500.1.p	-1.01459	0.323803	0.0139444	0.225266	Down	XP_007211762.1	SNF1-related protein kinase regulatory subunit beta-2 [Prunus persica]	71.38	2e-153	sp|Q9SCY5|KINB2_ARATH	SNF1-related protein kinase regulatory subunit beta-2 OS=Arabidopsis thaliana GN=KINB2 PE=1 SV=1	At4g16360	414	3e-147	KOG1616	Protein involved in Snf1 protein kinase complex assembly	G	Carbohydrate transport and metabolism	K07199|1|0.0|593|pavi:110768619|5'-AMP-activated protein kinase, regulatory beta subunit		GO:0016301//kinase activity	GO:0016021//integral component of membrane	MGNVNGREDGGGSPSAAEEESGGGSVQEGHAHGRGVSGGGDGSSELMGQSPPHSPRATHSPLMFTPQVPVVPLQRPDEIHIPNNSWMQTSGFEDMCCEQGIPTMITWSYGGKDVAVEGSWDNWKTRMALQRSGKDFTIMKVLPSGVYQYRFIVDGQWRFSPDLPLAQDDAGNSYNLLDLQDYVPEDIGSISGFEPPQSPDSSYNNLQLGSEDFAKEPPLVPPHLQMTLLNAPSSYMEMPPPLSRPQHVVLNHLYMQRGKSGPSVVALGTTERFIAKYVTVVLYKSLQR
Prupe.4G007100.1.p	-10.3603	7.22811	0.00381005	0.289521	Down	XP_007212092.1	protein NAR1 [Prunus persica]	69.1	0	sp|Q94CL6|NAR1_ARATH	Protein NAR1 OS=Arabidopsis thaliana GN=NAR1 PE=1 SV=1	Hs11968051	422	2e-144	KOG2439	Nuclear architecture related protein	Y	Nuclear structure	K15397|1|1e-13|77.8|psom:113315658|3-ketoacyl-CoA synthase [EC:2.3.1.199]		GO:0051536//iron-sulfur cluster binding;GO:0003954//NADH dehydrogenase activity	-	MSEKFSATLRIGDLNDFIAPSQACIVSLKGLKASSTKPSAKPEVSTSSKQLKTEPVKISLKDCLACSGCVTSAETVMLEKQSLDEFLFNIDKGKAVIVSLSPQSRASLAVYFGISPLQVFRKLTTFFKSLGVKAIFDTSCSRDLTLVESCNEFITRYKQSQSTDDKSCQSSLPMISSACPGWICYAEKQLGSYVLPYISSVKSPQQTIGVIVKNNICQKMGLRPADVYHVTVMPCYDKKLEASRDDFVFEVEQSKTNENEGLRVSEVDSVLTSGEVLELIQLKGVDFKGLEESSLDGMLTNFNEGHLYGVQGSSGGYAETIFRYAGKVLFGREVKGPVDFRTIKNSDFQEVTLEVEGKTVLKFALCYGFRNLQNIVRKIKIGKCDYHFLEIMACPSGCL…
Prupe.4G008500.1.p	1.54097	0.352012	0.00468025	0.164808	Up	XP_007211621.1	U-box domain-containing protein 4 [Prunus persica]	43.27	3e-79	sp|O22193|PUB4_ARATH	U-box domain-containing protein 4 OS=Arabidopsis thaliana GN=PUB4 PE=1 SV=3	At3g01400	276	3e-89	KOG0167	FOG: Armadillo/beta-catenin-like repeats	S	Function unknown	K22499|1|1e-166|480|egu:105056199|armadillo repeat-containing protein 5!K08332|2|1e-146|429|atr:18446632|vacuolar protein 8	-	-	-	MVSLQDSHSSSNHFPPHTRNFYSPSSTKIHRQTGRSMRTIRSNIYHDDQSRNSFTTERSSFVSENLTDSVIDMRLGELALRTHGSAAKSASSDEEFLQLSQAFSDFSACSSDISGELQRLATLPSPENAPTSEPEPEVPEEPCQGFLQRENFSTEIIESISPEDLLPTVKICVDGLQSPSIAIKQSAAAKLRLLAKNRADNRALIGESGAVPALIPLLRCSDPWTQEHAVTALLNLSLHESNKAIITNAGAIKSLVYVLKTGTETSKQNAACALLSLALIEENKSSIGACGAIPPLVSLLISGSTRGKKDALTTLYKLCSIKPNKERAVNAGAVKPLVALVAEQGTGLAEKAMVVLSSLAGVEEGKEAIVEEGGLAALVEAIEDGSVKGKEFAVLTLLQ…
Prupe.4G008900.1.p	1.54857	0.165402	3.29734e-05	0.0177368	Up	XP_007212196.1	cysteine proteinase inhibitor 1 [Prunus persica]	47.66	2e-27	sp|Q6TPK4|CYT1_ACTDE	Cysteine proteinase inhibitor 1 OS=Actinidia deliciosa PE=1 SV=1	-	-	-	-	-	-	-	K13899|1|4e-109|310|pper:18778329|cystatin-C		GO:0004869//cysteine-type endopeptidase inhibitor activity	-	MRIVLLVKKIQEIQQSNKSTVMMRPHCLLALVALVLPLVAAAATGHRDALVGGYQPIKNISDPHVKEIAEFAVSEYNKQAQGKNKLVFQSVIRGETQVVAGIKYRLVISAKNESSAVSNPTAAAAAGDNYQAVVLEKSWEHFRQLISFRKLA
Prupe.4G010400.1.p	1.05507	0.39002	0.0268586	0.263047	Up	XP_007213948.1	U4/U6.U5 tri-snRNP-associated protein 2 [Prunus persica]	22.99	6e-12	sp|Q9FPS4|UBP23_ARATH	Ubiquitin carboxyl-terminal hydrolase 23 OS=Arabidopsis thaliana GN=UBP23 PE=2 SV=2	At4g22410	555	0	KOG2026	Spindle pole body protein - Sad1p	Z	Cytoskeleton	K12847|1|0.0|1171|pper:18778701|U4/U6.U5 tri-snRNP-associated protein 2	GO:0016579//protein deubiquitination;GO:0000245//spliceosomal complex assembly	GO:0036459//thiol-dependent ubiquitinyl hydrolase activity;GO:0008270//zinc ion binding	-	MNYKREHEDDARVNAEGFESDPKRQKRNGHSSPSSSPPPPASEGSLLPGFNYGDEDDEDNQRRPPVDGYRGDGGDNQRDIKSGVEVEEEEEDDDDDDLEQGLYRRSREIEVRRDCPYLDAVNRQVLDFDFEKFCSLSLSNLNVYACLVCGKYYQGRGKKSHAYTHSLEAGHHVYINLRTEKVYCLPDGYEISDPSLDDIRHVLNPRFTEEQVEQIDKNKQWSRALDGSDYLPGMVGLNNIKETDFVNVTIQSLMRVTPLRNFFLIPKNYQHCKSPLVHRFGELTRKIWHARNFKGQVSPHEFLQAVMKASKKRFRIGAQSDPVEFMSWLLNTLHADLRTSKKDSSIIYECFQGELEVVKEIPKKGIEKKENGDDQNTDVVTENNGIVKERYKMPFLMLG…
Prupe.4G021000.1.p	1.18545	0.372597	0.0244942	0.261746	Up	XP_020418345.1	tRNA wybutosine-synthesizing protein 2/3/4 isoform X1 [Prunus persica]	60.79	0	sp|Q8W4K1|TYW23_ARATH	tRNA wybutosine-synthesizing protein 2/3/4 OS=Arabidopsis thaliana GN=At4g04670 PE=2 SV=1	At4g04670_2	504	3e-168	KOG0379	Kelch repeat-containing proteins	R	General function prediction only	K15450|1|0.0|2137|pper:18780475|tRNA wybutosine-synthesizing protein 3 [EC:2.1.1.282]	-	-	-	MEFEKRKAATLASLRSEETDKSPKGTVDAPIIPLLNTLNSHPNYFTTSSCSGRISILSQPTHSKLKTKKKALGGTWLFITHDPADPDSVLNRLFRSDSTSKDEQDNQNDLVFRFEPLIIAVECKDLASAQSLVSKAIACGFRESGITNSSKRVIIAIRCSIRLEVPLGSSHEIMVSCEYVRFLVGVANEKMEANRKRTEAFFLALQSESGGFLGPTPANGGTLADGEAELEARDDNAHSDSGSVEVPGCSLSVVEMAISGEPEENLFLWGHSACALEAKNQNGVLVFGGFGGIGRHGRRNHSWLVDPFSGTVKAINVESSPSPRLGHTSSLVGDCVFVIGGRSDPEKILNDVWVLNTSKKEWKFLECSGDVFPPRHRHAAAVVGSKIYVFGGLNNDTIT…
Prupe.4G021100.1.p	-1.15857	0.31449	0.00618363	0.182826	Down	XP_007211579.1	peroxidase 42 [Prunus persica]	79.09	0	sp|Q9SB81|PER42_ARATH	Peroxidase 42 OS=Arabidopsis thaliana GN=PER42 PE=1 SV=2	-	-	-	-	-	-	-	K00430|1|0.0|689|pper:18781284|peroxidase [EC:1.11.1.7]	GO:0006979//response to oxidative stress;GO:0042744//hydrogen peroxide catabolic process	GO:0020037//heme binding;GO:0046872//metal ion binding;GO:0004601//peroxidase activity	GO:0005576//extracellular region	MSSRALFFFALLAFSAVSCFAENEEDPGLVMDFYKDSCPQAEDVIREQVKLLYKRHKNTAFSWLRNIFHDCAVQSCDASLLLDSTRRSLSEKEMDRSFGMRNFRYIEEIKEALERECPGVVSCSDILVLSAREGVVRLGGPFIPLKTGRRDGRRSRAEILEQYLPDHNESMSTVLEKFADMGIDTPGLVALLGAHSVGRTHCVKLVHRLYPEVDPQLNPDHVGHMLKKCPDAIPDPKAVQYVRNDRGTPMIFDNNYYRNILDNKGLMMVDHQLATDKRTKPYVKKMAKSQDYFFKEFSKAFTILSENNPLTGTKGEIRQQCNVANKIHD
Prupe.4G022300.1.p	2.2081	0.349274	0.00800049	0.18887	Up	XP_007212017.1	SWI/SNF complex subunit SWI3B [Prunus persica]	48.33	3e-145	sp|Q84JG2|SWI3B_ARATH	SWI/SNF complex subunit SWI3B OS=Arabidopsis thaliana GN=SWI3B PE=1 SV=1	At2g33610	366	7e-123	KOG1279	Chromatin remodeling factor subunit and related transcription factors	B	Chromatin structure and dynamics	K11649|1|0.0|1019|pper:18779430|SWI/SNF related-matrix-associated actin-dependent regulator of chromatin subfamily C		GO:0003677//DNA binding	GO:0005634//nucleus	MATSSDKPPPAPSPTSVKPETPGSATPRQTQPSPSADANVILVPSYSSWFSPDHIHHCEVRFLPEFFDSRSPSKNPTLYKYYRNTIVKHSRAVNPSRKLTFTEARKALVGDVGSVRRVFDFLEAWGLINYTPSALNKPLRWEDKDSKAAAASHGGAESPSGGPKDSASAPNKESPKKRTCNGCKSLCSIACFVSEKNDMTLCARCYVRGNYQIGVSSSDFRRVEINEETGNGWADKDTLHLLEGLMHYGDDWRKVAQHVGRSEKECVAHFLKIPFGEELNGDLDSGNLDHKPSSALQDNAGDAEFGMEGNGDGTTPSLGKRMRLTPLADASNPIMAQTAFLSALAGVKVAEAAACAAVTTLCGADYETSRMSAGFRASNARQHETDAALNGDTNLDALG…
Prupe.4G037700.1.p	-10.2206	6.56281	0.0135782	0.0282098	Down	XP_007214661.1	vacuolar protein 8 [Prunus persica]	27.7	2e-14	sp|O22193|PUB4_ARATH	U-box domain-containing protein 4 OS=Arabidopsis thaliana GN=PUB4 PE=1 SV=3	At1g61350	624	0	KOG0167	FOG: Armadillo/beta-catenin-like repeats	S	Function unknown	K08332|1|1e-78|263|ppp:112279848|vacuolar protein 8			GO:0005737//cytoplasm;GO:0005634//nucleus	MRTTKMGEEEKGPKETEQSPDLPESSAGASSLRRAVESISSLISLSFSIKIFAAKWNTIRTKLEDLNSGLAAVQNCETDENPVLLGLVSNISGTVNECHGLARRCVDLSYSGKLLMQSDLDMLSAKLDLHARNLSEIYNAGVLTHRFAIVVSRPGNGACRDDMRFYVRDLMTRMKIGGAEMKRQALLNLYEAVVEDDRYVKVVVEQSDIVNVLISLLDSHEAEIQEWSAKVVSVISGFGSYKVVLIGAGIIAPLIRVLECGSEVGKEGAAKSLQRLTENSDNGWSISAHGGVTALLKLCSGCEGGGVRAELVGPACGALKNLVGIEEIKRFMVEEGVISTFIGLTRSKDEVLQINSIEFLQNIASGDEAVRSMVIKEGGIRALVRVLEYRSACSCKVRE…
Prupe.4G047900.1.p	-1.52352	0.463056	0.0166108	0.236628	Down	XP_020417635.1	uncharacterized protein LOC18780412 [Prunus persica]	-	-	-	-	-	-	-	-	-	-	-	-			GO:0016021//integral component of membrane	MSSPSSSAFFVICLLHSAIAITCGALMMFYMMEIYTFGHGIETAKKLLGSTPHDQLLIRTSDSFSGLLLFAIGFLLLMVSFVKDREFQSFFAKGCTVLHVFMALWRCYFERRVEDLAWDWLRQTVGDVVLAASWVFFLVFSWREKYD
Prupe.4G048100.1.p	10.1862	6.38182	0.0168472	0.152892	Up	XP_007211372.2	L-type lectin-domain containing receptor kinase VII.1 [Prunus persica]	63.32	0	sp|Q9S9U1|LRK71_ARATH	L-type lectin-domain containing receptor kinase VII.1 OS=Arabidopsis thaliana GN=LECRK71 PE=2 SV=1	At5g42120	290	8e-88	KOG1187	Serine/threonine protein kinase	T	Signal transduction mechanisms	K04733|1|0.0|995|vra:106775227|interleukin-1 receptor-associated kinase 4 [EC:2.7.11.1]		GO:0004674//protein serine/threonine kinase activity;GO:0030246//carbohydrate binding;GO:0005524//ATP binding	GO:0016021//integral component of membrane	MKETNQHPKHLLLLILLPAILSLQSALAVDFVFNGFNSSDMLLLYSNATVESRILTLTNSTNFSIGRALYKSKIPAKAPNSSYVYPFSTSFIFSIAPYKNTLPGHGMVFIFTPVAGIKGTSSSQHLGLFNFTNDGIPSNHVFGVEFDVFKNEEFQDINDNHVGIDVNSLKSVEAHEAGYWPENNDGSDDKDFKKLKLNSGENYQVWIDYKDFFINVTMVRAGMQRPRTPILSVFYNLSDVFEDEMFVGFTSSTGQLVESHKVLAWSFSNSNFSLSESLITSGLPSFVLPKSPIFKSKGFIAGIVVGGLFVIGVCALFSLFLIKRHRRLAREREDMEDWELEFWPHRITYQEIEAATKSFGEGNVIGVGANGKVYKGVLAGGAEVAVKRISHENDGMREF…
Prupe.4G054400.1.p	-10.2037	6.48374	2.54557e-05	0.000118828	Down	XP_007214436.1	OPA3-like protein [Prunus persica]	-	-	-	-	At1g28510	223	6e-75	KOG3335	Predicted coiled-coil protein	R	General function prediction only	-	-	-	-	MVLPLLKLGTLLLKTLSKPVAARLKQQAGLHPRFRQIIVSMAQANHQVTTRMQRRLYSHATDVEIRPLNEEKAVQAAVDLIGELFVFSVAVAVLIFEVQRNSRSEARKEELRKQELETMKQRDEALSREVVLLRAKFEELEKLAKGRGLSGIINFKRAETEGAKTEKPA
Prupe.4G056300.1.p	10.3711	7.27084	0.00137229	0.0436487	Up	XP_007211914.1	ATP synthase mitochondrial F1 complex assembly factor 1 [Prunus persica]	-	-	-	-	At2g34050	209	9e-68	KOG3281	Mitochondrial F1-ATPase assembly protein	O	Posttranslational modification, protein turnover, chaperones	K07555|1|0.0|521|pper:18779820|ATP synthase mitochondrial F1 complex assembly factor 1	GO:0006461//protein complex assembly		GO:0005739//mitochondrion	MRRASRIISLPASNFIAHASSSACAVNKHSFTTLTAQQNHHNLHLQSFPGDFLKWGSLGFFRTSSFATGFAPLKPKPLGSIIDVERVKDRSAEDIASAWDDFHLGRGHIGASMKANLYHLLEHRAAECRYFVIPLWRGGGYTTMFAQVQTPHMLFTGLEDYKAKGTQAAPYFAVTYYNEFAESKDMVLIRGDVVMPSKLSDSEAKWLLETTQSFYVNDTRYKLVERFNRQTHDFEFKDVLQALEIPNL
Prupe.4G061300.1.p	-10.4356	7.62551	0.025554	0.876816	Down	XP_007211595.1	dihydroorotate dehydrogenase (quinone), mitochondrial isoform X1 [Prunus persica]	81.14	0	sp|P32746|PYRD_ARATH	Dihydroorotate dehydrogenase (quinone), mitochondrial OS=Arabidopsis thaliana GN=PYRD PE=1 SV=2	At5g23300	736	0	KOG1436	Dihydroorotate dehydrogenase	F	Nucleotide transport and metabolism	K00254|1|0.0|934|pper:18779833|dihydroorotate dehydrogenase [EC:1.3.5.2]	GO:0044205//'de novo' UMP biosynthetic process;GO:0006207//'de novo' pyrimidine nucleobase biosynthetic process	GO:0004152//dihydroorotate dehydrogenase activity	GO:0005743//mitochondrial inner membrane	MAARASRKLLRDFLFRRACTAPIASARHCSSAAETAPKIPHFSKKGRLLTGTFLGLVIGGGAYVSTVDEATFCGWLFAATKLVNPFFALLDPEVAHRLGVSAAARGWVPREKRPDPSNLGLEVWGRKFSNPVGLAAGFDKNAEAVDGLLGLGFGFVEIGSVTPVPQEGNPKPRIFRLREEGAIINRCGFNSEGIVAVAKRLGAQHGKRKLDETTSTSSSSGEEVKPGGKAGPGILGVNLGKNKTSEDASSDYVQGVHTLSQYADYLVINVSSPNTPGLRMLQGRKQLKDLVKRVQAARDEMQWGEEGPPPLLVKIAPDLSKEDLEDIAAVALALRLDGLVISNTTVSRPDPVSTNPVASEAGGLSGKPLFNISTSLLKDMYNLTRGKVPLIGCGGISSG…
Prupe.4G065700.1.p	10.0099	5.64794	0.01899	0.0799658	Up	XP_007214446.1	cellulose synthase A catalytic subunit 8 [UDP-forming] [Prunus persica]	81.45	0	sp|Q8LPK5|CESA8_ARATH	Cellulose synthase A catalytic subunit 8 [UDP-forming] OS=Arabidopsis thaliana GN=CESA8 PE=1 SV=1	-	-	-	-	-	-	-	K10999|1|0.0|2050|pper:18780883|cellulose synthase A [EC:2.4.1.12]	GO:0009834//plant-type secondary cell wall biogenesis;GO:0030244//cellulose biosynthetic process;GO:0071555//cell wall organization	GO:0016760//cellulose synthase (UDP-forming) activity;GO:0046872//metal ion binding	GO:0016021//integral component of membrane;GO:0005886//plasma membrane	MMQSGIPLCNTCGEQVGLDANGEVFVACHECNFPVCKTCFDLDIKEGRKACLRCSTPYDDENSLADDETKVSGTRSAMAAHLDNSQDIGIHARHVSNVSAVDSELNDEYGNPIWKNRVESWKDKKDKKSKKKKGAPKEEKVAQIPPEQQMTENHSPDAAEPLSTIIPLPPNKITPYRVVIIMRLIILALFFHYRVTNPVDSAYGLWLTSIICEIWFAFSWVLDQFPKWYPVNRTTFTDRLSARYEREGEPSELAAVDFFVSTVDPLKEPPLITANTVLSILAVDYPVDKVSCYVSDDGAAMLTFESLAETSEFARKWVPFCKKFSIEPRAPEFYFSQKIDYLKDKVQPSFVKERRAMKRDYEEFKVRMNALVAKAQKTPEDGWTMQDGTPWPGNNSRDH…
Prupe.4G073600.1.p	-1.23073	0.396221	0.0171731	0.238671	Down	XP_007213978.1	60S ribosomal protein L32-1 [Prunus persica]	84.21	8e-83	sp|P49211|RL321_ARATH	60S ribosomal protein L32-1 OS=Arabidopsis thaliana GN=RPL32A PE=2 SV=2	At4g18100	238	2e-82	KOG0878	60S ribosomal protein L32	J	Translation, ribosomal structure and biogenesis	K02912|1|7e-96|275|pmum:103325032|large subunit ribosomal protein L32e	GO:0006412//translation	GO:0003735//structural constituent of ribosome	GO:0005840//ribosome	MAVPLLNKAIVKKRVKQFKRPQSDRKVSVKTNWRRPKGIDSRVRRKFKGCTLMPNIGYGSDKKTRHYLPNHFKKFVVHNAKELELLMMHNRTYCAEIAHNVSTRKRKEIVERAAQLDVVVTNKLARLRSQEDE
Prupe.4G084000.1.p	1.7005	0.200695	2.88117e-05	0.0177368	Up	ONI11039.1	hypothetical protein PRUPE_4G084000 [Prunus persica]	71.01	0	sp|Q9C7S7|ERO1_ARATH	Endoplasmic reticulum oxidoreductin-1 OS=Arabidopsis thaliana GN=AERO1 PE=1 SV=1	At1g72280	659	0	KOG2608	Endoplasmic reticulum membrane-associated oxidoreductin involved in disulfide bond formation	OU	Posttranslational modification, protein turnover, chaperones;Intracellular trafficking, secretion, and vesicular transport	K10950|1|0.0|942|pper:18779493|ERO1-like protein alpha [EC:1.8.4.-]	GO:0051604//protein maturation	GO:0016671//oxidoreductase activity, acting on a sulfur group of donors, disulfide as acceptor;GO:0003756//protein disulfide isomerase activity	GO:0005789//endoplasmic reticulum membrane	MAGEKGKTKRWGWAVGALIAVFVAVAMTSRTAPKISFFGRSNKPCNCTQETHKYSGIVEDCCCDYETVDHINKEVLHPSLQELVKTPFFRYFKVKLWCDCPFWPDDGMCRLRDCSVCECPDSEFPESFKKPHHGLPLDDLVCQEGKPEAAVDRTLDKKAFRGWTEIDNPWTNDDETDNAEMTYVNLQLNPERYTGYTGPSARRIWDAVYAENCPKYPSEELCAEERILYKLISGLHSSISVHIASDYLLDETTQMWGSNLPLMYDRVLRYPDRVRNLYFTFLFVLRAVTKAADYLEHAEYDTGNLNEDLKTQSLVRQLLYNPNLQAACPVPFDEAKLWKGQRGPELKQKIQNHALMDCVGCEKCRLWGKLQVLGLGTALKILFSVDGQQNTDQTLHLQR…
Prupe.4G115300.1.p	-10.2273	6.59492	0.0171644	0.609336	Down	XP_020418387.1	urease accessory protein D [Prunus persica]	68.97	1e-156	sp|Q7Y0S0|URED_ARATH	Urease accessory protein D OS=Arabidopsis thaliana GN=URED PE=2 SV=1	-	-	-	-	-	-	-	K03190|1|0.0|546|mdm:103422293|urease accessory protein	-	-	-	MEKQGRVVVDKVGGRSTVTRCFSKYPLKFIIPRKVGSSETDAVWVYTLTYGGGIVSGDSVSCEFTIGDGCTTVLTTQASTKVYKSVGSKCCEQVLEARVGSDALLAVIPDPVTCFSTARYSQKQVFRVASNSSLVIVDWITSGRHESGEKWDFDLYKSANHIFIEDDEPLFLDMVHLERGSVSSIAERMQDYQVIAMVVLLGPRIKHIQNLVQENVKRMMSEQLQIPSTASGRQLKPNSDNRFTKPSFIASSSVFGPKGIGVVVRIAATTTESVYKFLQHQLAGLEPLLGVSPYH
Prupe.4G125800.1.p	10.2764	6.79333	0.000248496	0.152892	Up	XP_007213097.1	18.1 kDa class I heat shock protein [Prunus persica]	54.24	7e-39	sp|P04794|HSP14_SOYBN	17.5 kDa class I heat shock protein OS=Glycine max GN=HSP17.5-E PE=3 SV=1	At1g07400	126	2e-37	KOG0710	Molecular chaperone (small heat-shock protein Hsp26/Hsp42)	O	Posttranslational modification, protein turnover, chaperones	K13993|1|2e-117|332|pper:18778516|HSP20 family protein	-	-	-	MSLLQSLLDQPNFLSPLRVFNSDIGYNNTYMDWKETSHAHIFKIDLPGLTKEDVKLEVHENRVLHVSAERKAEPEAEDPKNETWHCRERTSGSFSRNFRLPENAKVDEIKASMRDGVLVITVPREDDLKKKHKHHKKVEISGDEEKHGSKGLGRFVCCKA
Prupe.4G150800.1.p	10.4118	7.45912	0.00599095	0.000118828	Up	ONI12206.1	hypothetical protein PRUPE_4G150800 [Prunus persica]	-	-	-	-	-	-	-	-	-	-	-	K00558|1|9e-16|75.9|mdm:103436990|DNA (cytosine-5)-methyltransferase 1 [EC:2.1.1.37]	-	-	-	MKTEVDKSEPAAMATKARGSPYGPNREGQPSRDRPQGKCPHCGMPGHSKSRCFELIGYPENWDRTRDPRCNKSRASVVETKNDSDQIADKASAMIAAAGSDGHPDAEDDWLWY
Prupe.4G155200.1.p	2.21873	0.80912	0.0253648	0.261746	Up	XP_007212054.1	kunitz trypsin inhibitor 2 [Prunus persica]	35.32	2e-30	sp|Q9LMU2|KTI2_ARATH	Kunitz trypsin inhibitor 2 OS=Arabidopsis thaliana GN=KTI2 PE=2 SV=1	-	-	-	-	-	-	-	-		GO:0004866//endopeptidase inhibitor activity	-	MMSMKLIGSLSCCIWLVMAIATVAQTSDDSNAPVLDTSGQALQAGVDYYIKPAITDSGGRFTLIDRNDSCPLYVGQENVSGPKGLPVTFAPFAEGETVVRETRDQKITFSASTICVQSTAWKLGEIDQVTQRRLIVAGVDQNQGIAGPARNYFRINKQAALDGVYNLQWCPTELCPTCRFLCGSVGALVENGKRLLALDGSVLPVVFERA
Prupe.4G171600.1.p	-10.5955	8.50844	1.93682e-05	0.541694	Down	XP_020418500.1	uncharacterized protein LOC18778993 isoform X1 [Prunus persica]	44.62	3e-94	sp|Q5QNI2|NCL1_ORYSJ	Sodium/calcium exchanger NCL1 OS=Oryza sativa subsp. japonica GN=NCL1 PE=2 SV=1	At5g37770	53.5	7e-08	KOG0027	Calmodulin and related proteins (EF-Hand superfamily)	T	Signal transduction mechanisms	K13448|1|1e-09|62.0|brp:103864150|calcium-binding protein CML	-	-	-	MSNIITKTAYWVLVLLVIIVQVRGRYFRLVSDGETDHHHHPHNQNQSSSSSLLLFKGIDSAEEETCEQLYGFLPCSNSVYGQVFLMVVYEFLLFHGESYLAAGGEQIFQILGPGVFGASAFHVLGALPESLLLLASGLFNSKDIAAEYVYTGVGLLAGTSILLLTILWGTCVIVGSQDFPNELSSDSEASKDSISSPPLSWKRLPASLTGCGITTDVETSRLARIMICSGAPFLIMQIANIFQSSSKERIAILIALCVSVFFLLLYFIYQIFQPWVQKRRLEFVKHGHLVSSILQHVQKHALGRLLTVQGAPNLYAIRRLFEEVDEDGDNYISLSEVKELLLEIKFISTEDDKDKGTAEVMKQFDLDRDGKITKDEFINGFTKWIDEVKAVHKQHTQRS…
Prupe.4G179900.1.p	1.32988	0.349034	0.0124979	0.216998	Up	ONI12708.1	hypothetical protein PRUPE_4G179900 [Prunus persica]	-	-	-	-	-	-	-	-	-	-	-	K14012|1|1e-10|65.5|lsv:111912352|UBX domain-containing protein 1			GO:0009941//chloroplast envelope	MSTGRDRLLKNLKKFADFQYKIFTARYGQQLIDIFEFPVKLVLSPFTLAIDIAGSAPRGFGVPELVSKLSYMSIFAVATLGTYDIALELGKKVICQRNCGTCNGWQALRCTMCRGSGRVHYQVKNYTLKSGEKATAECIADAIADNRAELVHLPSSINLNVPLPSKDCPTCDGTGVMGCHECKDKLQVRISADDIMEPPWKAYNVLRKMDYPYEHIVHSMKDPSIAAFWLFTLPQVAGGFDFDDDVKKKIWWQYKESMRYDQLRDVVAKRKPGWENLQEALISIDPARAREDPVIVKNIPYYKAKKALEAEVMKLDPPPRPQNWGELDLPLNASSWSKEDLKNPEKFYEMTVLLNAQREIADKILDSQWENRWRQQRLNEMLEEKVRPYMQNIDSGILS…
Prupe.4G193200.1.p	-1.13741	0.333043	0.0189366	0.243227	Down	ONI12944.1	hypothetical protein PRUPE_4G193200 [Prunus persica]	48.02	0	sp|O81832|Y4729_ARATH	G-type lectin S-receptor-like serine/threonine-protein kinase At4g27290 OS=Arabidopsis thaliana GN=At4g27290 PE=3 SV=4	At4g23240	372	4e-122	KOG1187	Serine/threonine protein kinase	T	Signal transduction mechanisms	K04733|1|0.0|892|cic:CICLE_v10007490mg|interleukin-1 receptor-associated kinase 4 [EC:2.7.11.1]	-	-	-	MKSLITLIFFASLIQFSVLNLSTAADTISALESIMGSDTLVSSGQSFQLGLFSAGNSKTWYLGLWYKNFPNTVVWVANRENPLAGSNGALTLTKNGSLVLLDQMNNTIWSTISSQIVENPVAQLLETGNLVVRDKAETGSENYIWQSFNFPSDTLLPDMKVGWDFRTGLNRFLTSWKNASDPSLGEYTYGIDNLMLPQLVVAEGSKKLFRTGPWNGIRFTGTPDAGNERVVKPIYVYDTNELYYMYEATDSSILTRVKLSETGLSQRLVLKKGTTEWDVMYTLQNDRCDNYGECGANGICKTSNSPSCECLQGFVPKSQNEWDVLNWESGCIRQTPLDCQKGAGFLKVRNVKLPDLLEFWVNMKMSVEECEAECLRNCSCVAFSNTDIRNGGSGCLMWF…
Prupe.4G200300.1.p	10.4674	7.7517	2.24717e-05	0.00242387	Up	XP_007213821.1	calcium/calmodulin-regulated receptor-like kinase 1 [Prunus persica]	84.14	0	sp|Q9FIU5|CRLK1_ARATH	Calcium/calmodulin-regulated receptor-like kinase 1 OS=Arabidopsis thaliana GN=CRLK1 PE=1 SV=1	At5g54590	697	0	KOG1187	Serine/threonine protein kinase	T	Signal transduction mechanisms	K04733|1|0.0|882|pavi:110754376|interleukin-1 receptor-associated kinase 4 [EC:2.7.11.1]	GO:0009631//cold acclimation	GO:0004674//protein serine/threonine kinase activity;GO:0005516//calmodulin binding;GO:0005524//ATP binding	GO:0016021//integral component of membrane;GO:0005886//plasma membrane;GO:0010008//endosome membrane	MKGEPAGLIIGVSIGVVIGVLLAISGFFCIRYHRRRLQIGNSSSRRTATIPIRANGADSCTILSDSTVGPDSPVKSGRNGSSFWLEGFKKSNVVSMSGIPQYSYKDLQKATYNFTTLIGQGAFGPVYKAQMSTGETVAVKVLATDSKQGEKEFQTEVKLLGRLHHRNLVNLIGYCAEKGQHMLIYVYMSKGSLASHLYSEKHEPLSWDLRVLIALDVARGLEYLHDGAVPPVIHRDIKSSNILLDQSMRARVADFGLSREEMVDKHAANIKGTFGYLDPEYISTRNFTKKSDVYSFGVLLFELIAGRNPQQGLMEYVELAAMNTEGKVGWEEIVDSRLNGNFHMQELNEVAALAYKCVNRAPKKRPSMRDIVQVLSRMLKMRHNRMHMKSLSSVTDEVT…
Prupe.4G206000.1.p	-10.218	6.54831	2.52033e-05	0.314311	Down	ONI13151.1	hypothetical protein PRUPE_4G206000 [Prunus persica]	38.52	2e-104	sp|Q93V99|PDF2_ARATH	Homeobox-leucine zipper protein PROTODERMAL FACTOR 2 OS=Arabidopsis thaliana GN=PDF2 PE=2 SV=1	-	-	-	-	-	-	-	K09338|1|0.0|1064|pavi:110751219|homeobox-leucine zipper protein	-	-	-	MEVCARSAGKMTKVEGYCESGLDLWVDLKIDSNPENDLDHSDLPQPIASPQGSSTRAQLSDLGSQPILGSNFDTDERGSDLLMPASPDADVSKIKISERASDAMEELLSLALAQEPLWQVDKENNTEMLSDVEYMRMVKVRECQSPPSLEVDSSHELEPVLAVSSESSRAVEYFKTSPISIIELLMDLEQWSLAFSNIVSKAMLVGVLASTGVERHYDGTLQLMTAEFHAPSPLVPTRESSFARYCKKLGSGLWGVVDVSPETLPQFPSRNFRRRPSGCLIEEMPNGCSKPLVTSGFAFCAKRWVNTLIQHFQWSATVRAPNSPTDRGVIIAQPQRTFFLKFSERMVKSFFMDISASRENKWMPFPVSGADIMISTKSSIDDHGKIPGTTTVFATSVHL…
Prupe.4G213900.1.p	1.13117	0.106492	5.39986e-06	0.00676926	Up	XP_007212250.1	protein translation factor SUI1 homolog [Prunus persica]	76.52	2e-61	sp|P56330|SUI1_MAIZE	Protein translation factor SUI1 homolog OS=Zea mays GN=TIF PE=3 SV=1	At5g54940	197	5e-67	KOG1770	Translation initiation factor 1 (eIF-1/SUI1)	J	Translation, ribosomal structure and biogenesis	K03113|1|3e-77|226|pavi:110752412|translation initiation factor 1		GO:0003743//translation initiation factor activity	-	MVELDVQIPTAFDPFAEAKDADAPGAKEYVHIRVQQRNGKKCLTTVQGLKKDFSYEKILKDLKKEFCCNGNVVQDKELGKIIQLQGDQRKNVLQFLVQAKIVKKEQIKMHGF
Prupe.4G214000.1.p	10.222	6.53827	2.66426e-05	0.000118828	Up	XP_008226897.1	PREDICTED: uncharacterized protein At4g14342 [Prunus mume]	89.66	3e-58	sp|Q9LW64|SF3BA_ARATH	Uncharacterized protein At3g23325 OS=Arabidopsis thaliana GN=At3g23325 PE=3 SV=1	At3g23320_2	166	2e-55	KOG3485	Uncharacterized conserved protein	S	Function unknown	K12832|1|1e-61|185|pxb:103956264|splicing factor 3B subunit 5	GO:0000398//mRNA splicing, via spliceosome		GO:0071011//precatalytic spliceosome;GO:0005686//U2 snRNP;GO:0005689//U12-type spliceosomal complex	MQASDRFNINSQLEHLQAKYVGTGHADLNRYEWAVNIQRDSYASYVGHYPILAYFALAENESIGRERYNFMQKMLLPCGPPPEREDD
Prupe.4G217900.1.p	-10.1634	6.30659	0.0109925	0.940386	Down	XP_020416963.1	probable WRKY transcription factor 31 isoform X1 [Prunus persica]	47.05	1e-122	sp|Q9XEC3|WRK42_ARATH	WRKY transcription factor 42 OS=Arabidopsis thaliana GN=WRKY42 PE=1 SV=1	-	-	-	-	-	-	-	K13424|1|3e-25|114|pxb:103962153|WRKY transcription factor 33!K18834|5|5e-25|112|bvg:104883304|WRKY transcription factor 1	-	-	-	MESAARDHSIHNCRSIEQPLLSPETAVDHDHHGKRIVDELDFFADNKGRLMEMRDQTVEVKEEGAHDHHGVGQEKQLPDVNTGLNLLTTYTSSDKSSMDDGTSSFHNMEDKHRTNELAVLQAELGRMSVENQRLRVMISQVNNNYQALQVQIVTLMQRQQNQKADHQTPEQHKMINNGSVVVEEKQMMNGFNHIVPRQFMDMGRAEKDELSQCSLEGCRSQDCSGSPPRNDIVESMECGKSTSHVLHRDLSGRISTTNGGEDSPDQEFQGWVPKKVSKMMSPRDVDQASSETMSMIKKARVSVRARSEASMISDGCQWRKYGQKMAKGNPCPRAYYRCTMGTGCPVRKQVQRCAEDRTILVTTYEGHHNHPLPPAAMAMASTTSAAASMLLSGSMPSAD…
Prupe.4G222100.1.p	-1.08654	0.367719	0.018291	0.241317	Down	XP_007212383.1	glucan endo-1,3-beta-glucosidase 14 [Prunus persica]	42.39	3e-117	sp|Q9M069|E137_ARATH	Glucan endo-1,3-beta-glucosidase 7 OS=Arabidopsis thaliana GN=At4g34480 PE=1 SV=2	-	-	-	-	-	-	-	K19891|1|3e-128|384|smo:SELMODRAFT_442025|glucan endo-1,3-beta-glucosidase 1/2/3 [EC:3.2.1.39]	GO:0005975//carbohydrate metabolic process	GO:0004553//hydrolase activity, hydrolyzing O-glycosyl compounds	-	MSMATFTFPFFLSLLLLPLSSLLTFAAENTTGTIGINYGRIANNLPPPEKVVALLKSQGINKVKLYDTDAAVLTALANSGINVVVALPNELLSSAANDPSFADKWVQANISQYHPQTQIEAIAVGNEVFADPNNTTKFLVPAINNLQSALVKHNLSSSIKLSSPIALSALQNSYPSSSGSFKPDLIEPAVKPLLDFLSKTSSYLMINAYPFFAYEANADEISLDYALFRTNPGNVDSGNGLRYNSLMEAQLDAVFAAMSALGYDDVKLVVTETGWPSNGDENEIGSGKANAAAYNGNLVKRVLTGGGTPLKPKDPLNVYLFALFNENQKPGPTSERNYGLFYPDEGKVYDIPLTLAGLNGAQSNPVNESKAQVPTTAPSSGNTWCVANVNAGEEKLQAG…
Prupe.4G225800.1.p	-2.21773	0.494871	0.0020519	0.147831	Down	XP_020418509.1	glycine-rich protein DC9.1 isoform X2 [Prunus persica]	75.86	8e-06	sp|P37703|GRP9_DAUCA	Glycine-rich protein DC9.1 OS=Daucus carota PE=2 SV=1	-	-	-	-	-	-	-	-	-	-	-	MASSKTFLLLGLMFAVVILICSEVSARELAETTTPSSRGAVSCNRPGALCHGRGEKGNNPKPGGEHCKKNPSLRGCYNHGGHERGGEEDPIHKRHGHEHGGEHDPNHKGRGHEHGGVVLEPIHGGKGHGHERGGEGDPNHGAHCKRGETNRACYGHGGHERGGEGDPINHGSKNRPGQPGTAETETKN
Prupe.4G238900.1.p	10.4524	7.6714	2.27069e-05	0.000535812	Up	ONI13694.1	hypothetical protein PRUPE_4G238900, partial [Prunus persica]	57.14	0	sp|Q6Q3H3|TPSGD_VITVI	(-)-germacrene D synthase OS=Vitis vinifera GN=VIT_19s0014g04930 PE=1 SV=1	-	-	-	-	-	-	-	K15803|1|0.0|1006|pmum:103342737|(-)-germacrene D synthase [EC:4.2.3.75]	-	-	-	LAASQAQSPNATLDHVKRRSANFSSSTWGDYFLSYASVKTDIKAEQDVQELKEKVKGMIMAPMLKNPSKKLELIDEIQRFGVSRHFENEVEEVLQQIHKNSYGDDEENDFDLFTTALRFRLLRQQGYKVSCGKDGKFKETLVDDVVGLLSLYEATHLRMHGEDLLDEALTFTTTHLESVEAHRLSPLLAKQVAHALHQPFWKGCQRPEARRYLAIFEEEPHLANETLLTLAKLDFNLVQQVHQKELSEISRWWKDLDFVNKLPFARDRVVECYFWAMGTYFEPQYCFARTSLSKVIAVITAIDDIYDVHGTQEELELFTEAVERWDISAMDQLPEYMKVCYGGMLDVYTEIEEKLGKEGNLYRIHYAREAMKCHVRGYFDEVKWLHQKYTPTMDEYMAV…
Prupe.4G254100.1.p	-10.3428	7.14274	0.0110569	0.256468	Down	XP_020417392.1	NAD(H) kinase 1 isoform X1 [Prunus persica]	70.61	0	sp|Q56YN3|NADK1_ARATH	NAD(H) kinase 1 OS=Arabidopsis thaliana GN=NADK1 PE=1 SV=2	7303295	261	6e-81	KOG2178	Predicted sugar kinase	G	Carbohydrate transport and metabolism	K00858|1|0.0|1182|pper:18779215|NAD+ kinase [EC:2.7.1.23]	-	-	-	MAPSKVNSAGDASVSCSQPENGFLNSLSLLSSEKAVQELLQQSPVQSTDDHLIEFSDAMRTVAKALRRAAEGKASAQAEAAEWKRKYELERARNLLLEHKGYNFYEKLESWWTQSSLCNAMGMIRFMLPCLFCLENCKERDRKISEEQSHRENNGDDERTENLASRSNEQSEQCCGSNGICSHEVLRDGDRDSASKVVPNKCARKASFKLSWCCKGDQSDQHKHDIVSFERGNITTAERSSKQISLKWESQPQTVIILTKPNSTSVRILCAEMVRWLREQKKLDIYVEPRVRAELLTESSYYNFVHTWKGETEIMLLHTKVDLVVTLGGDGTVLWAASMFKGPVPPVVPFSLGSLGFMTPFHSERYQEYLDSILKGPISITLRHRLQCHVIREAAKNEY…
Prupe.4G270800.1.p	-10.4608	7.74962	2.1276e-05	6.81542e-05	Down	XP_007213592.1	mitogen-activated protein kinase kinase kinase 3 [Prunus persica]	59.69	0	sp|F4HRJ4|M3K3A_ARATH	Mitogen-activated protein kinase kinase kinase 3 OS=Arabidopsis thaliana GN=MAPKKK3 PE=1 SV=1	At1g53570	652	0	KOG0198	MEKK and related serine/threonine protein kinases	T	Signal transduction mechanisms	K04421|1|0.0|1325|pper:18780007|mitogen-activated protein kinase kinase kinase 3 [EC:2.7.11.25]		GO:0005524//ATP binding;GO:0004672//protein kinase activity	-	MPAWWGRKSSKSKEEQEKTLQHKNPYSNRNNNNFIIKSSINSDIKKKEKDVRPKSFDEQITRGSPRASKELVRAGVSASGFSGFDSDGCERKQGHPLPRPSVSSAQGLGNDQVLGLGSGSASISSVSSSGSSDDQPIAHDSHAQLGASSYRANGDPKYNMMPRSPGPGSKGPTSPTSPLHPLFCAISLESPTGKQEDGKSVCHPLPLPPGSPTSPSALPSSRTSVAIENTTCALSKWKKGKLLGRGTFGHVYVGFNSESGQMCAIKEVRLVSDDRTSKECLKQLNQEINLLSRLSHPNIVQYHGSELGEDALSVYLEYVSGGSIHKLLQEYGPFKEPVIQNYTRQIISGLAYLHGRNTVHRDIKGANILVGPNGEIKLADFGMAKHITNCASMLSFKGS…
Prupe.4G273300.1.p	10.6148	8.58645	2.02868e-05	0.0282098	Up	XP_007212316.1	E3 ubiquitin-protein ligase RGLG3 isoform X1 [Prunus persica]	72.58	0	sp|Q8RX26|RGLG3_ARATH	E3 ubiquitin-protein ligase RGLG3 OS=Arabidopsis thaliana GN=RGLG3 PE=1 SV=1	At5g63970	511	0	KOG1327	Copine	T	Signal transduction mechanisms	K16280|1|0.0|776|pmum:103326935|E3 ubiquitin-protein ligase RGLG [EC:2.3.2.27]	-	-	-	MGNGESTYTDGSYDDSLRELPSHAGTSMDSNHQPKRQSAYIADNFNSLDQVISSLREAGLESSNLILGIDFTKSNEWTGRYSFHRKSLHAIGSTPNPYEQAISIIGRTLSPFDEDNIIPCFGFGDASTHDQCVFSFYPEGRYCHGFEEALARYREIVPLLKLSGPTSFAPIIDAAIDIVENSNGQYHVLVIIADGQVTRSPDTPPGRFSQQEQATVNSIVAASQYPLSIILVGVGDGPWDAMQKFDDNIPQRSFDNFQFVNFTKIMSENTDTSKKEAAFALAALMEIPYQYRATQSLHFVNREPVGGPRTRPLPPPREVINHDNAVKSIPQITNVQKVEPTAPVAPVEPVCPICLTNPKDMAFGCGHTTCKDCGLSLLSCPLCREPISTRLRLYT
Prupe.5G011600.1.p	-10.6491	8.83169	0.00557699	0.989064	Down	XP_020418975.1	arabinosyltransferase XEG113 isoform X1 [Prunus persica]	76.6	0	sp|Q8VXZ5|XG113_ARATH	Arabinosyltransferase XEG113 OS=Arabidopsis thaliana GN=XEG113 PE=2 SV=1	-	-	-	-	-	-	-	K20784|1|0.0|1302|pper:18777290|arabinosyltransferase [EC:2.4.2.-]	GO:0052325//cell wall pectin biosynthetic process;GO:0006486//protein glycosylation;GO:0080147//root hair cell development	GO:0052636//arabinosyltransferase activity	GO:0016021//integral component of membrane;GO:0005802//trans-Golgi network;GO:0005768//endosome	MGWRNAFDNAKPVFVTIYATVIIGIIFSSLYVISAIYSGKSAADSTTSWLSHVGSPPVEQAPNVSEPAIVQAVPTPSLEPRSMSTRPIWEAPLHTKKMPALKKFRLSKELVQERVKDNVIIVTFGNYAFMDFILTWVKHLTDLGLSNLLIGAMDTKLLEALYWKGVPVFDMGSHMSTIDVGWGSPTFHKMGREKVILIDSILPYGYELLMCDTDMVWLKDPLPYLARYPEADVLTSSDQVVPTVTDDRLDIWQQAVGAAYNIGIFHWRPTDAAKRLAKEWKDMLLADEKIWDQNGFNDLVRKQLGPPVDGESGLVYAFDGNLKLGVLPASIFCSGHTYFVQAMYQQLRLEPYAVHTTFQYAGTEGKRHRLREGMVFYDPPEYYDAPGGFLSFKPSIPKS…
Prupe.5G014700.1.p	-1.34627	0.204791	0.0223665	0.257698	Down	XP_020420122.1	NDR1/HIN1-like protein 12 [Prunus persica]	-	-	-	-	-	-	-	-	-	-	-	-			GO:0016021//integral component of membrane	MTRKFFHGATQRTTHPLVWFAAVICTVIAIAVIIAGIALFAGYMIIHPRVPFITVTSAHLDNFQNSVAGLLDTEITIIVKAENDNTKAHASFSDTSFTLSFQGLNIARLVALPFDVKKNSSVDFHYLVQSSSIPLSPEQMDQIDISLKRDKISFNLKGNLRARWRVGPIGSVKFWGHLNCHLRFHPSNGSYIHSPCSSRAK
Prupe.5G016800.1.p	-1.17368	0.403537	0.0196343	0.244953	Down	XP_007211110.1	probable serine/threonine-protein kinase PBL15 [Prunus persica]	74.26	0	sp|Q9SY91|PBL15_ARATH	Probable serine/threonine-protein kinase PBL15 OS=Arabidopsis thaliana GN=PBL15 PE=1 SV=1	At1g61590	644	0	KOG1187	Serine/threonine protein kinase	T	Signal transduction mechanisms	K04733|1|0.0|809|pavi:110752397|interleukin-1 receptor-associated kinase 4 [EC:2.7.11.1]	GO:0006468//protein phosphorylation;GO:0007166//cell surface receptor signaling pathway	GO:0004675//transmembrane receptor protein serine/threonine kinase activity;GO:0004674//protein serine/threonine kinase activity;GO:0005524//ATP binding	GO:0005886//plasma membrane	MRQQHSKPWRPFTANCCSAEDQTIFGNFSRCRPSRSDFSKDVAQLPSFRRLSFSDLSRSSSLRINDDLAQSFGSDLYDFQLSELRGVTQNFSVNFLLGEGGFGTVHKGYVDENLRQGLKAQAVAVKLLDIEGLQGHREWLAEVIFLGQLRHPHLVKLIGYCCEDEERLLVYEFMPRGSLENHLFKRLSISLPWSTRLKIAIGAAKGLAFLHGAEKPVIYRDLKTSNVLLDSDFTAKLSDFGLAKMGPEGSETHVTTRVMGTYGYAAPEYVSTGQLTTKCDIYSFGVVLLELLTGRRAMDKSRPKSEQNLIDWAKPYLSSTRRLRYVMDPRLSGQYSVKGAKEIAHLALQCISLSPKDRPRMPAIIETLESLQFLKDMAVTCGHWPASQKSSRNGVFAKA…
Prupe.5G018600.1.p	10.3083	6.96574	0.0407811	0.0401086	Up	XP_020419745.1	mediator of RNA polymerase II transcription subunit 34 [Prunus persica]	72.92	0	sp|Q9FT73|MED34_ARATH	Mediator of RNA polymerase II transcription subunit 34 OS=Arabidopsis thaliana GN=MED34 PE=1 SV=1	At1g31360	1011	0	KOG0353	ATP-dependent DNA helicase	R	General function prediction only	K10899|1|0.0|1464|pper:18777829|ATP-dependent DNA helicase Q1 [EC:3.6.4.12]	-	-	-	METEEILAEELLNVEVEIQGVQDQIKILLDQQERLYERQSELKAILEACKESGYPVNGASTTVEDWSGPFEWDSQADDTRFNIFGISAYRANQREIINAVMSGKDVLVIMAAGGGKSLCYQLPAILRDGVALVVSPLLSLIQDQVMGLAALGIPAHMLTSTTSKEEEKLIYKALEKGEGDLKILYVTPEKISKSKRFMSKLEKCHHAGRLSLISIDEAHCCSQWGHDFRPDYKSLGILKTQFPNVPVIALTATATQKVQSDLMEMLHIPRCVKFVSTVNRPNLFYMVREKSSVGKVVVDEIAEFIRDSCSHNDSGIVYCFSRKECEQVAKELRERGISALHYHADMDVNARENVHMRWSNGKLQVIVGTVAFGMGINKPDVRFVIHHSLSKSMETYYQE…
Prupe.5G020900.1.p	-1.20856	0.431312	0.0231245	0.259292	Down	XP_020419104.1	replication protein A 70 kDa DNA-binding subunit A [Prunus persica]	50.81	0	sp|Q9FHJ6|RFA1C_ARATH	Replication protein A 70 kDa DNA-binding subunit C OS=Arabidopsis thaliana GN=RPA1C PE=3 SV=1	At5g45400	845	0	KOG0851	Single-stranded DNA-binding replication protein A (RPA), large (70 kD) subunit and related ssDNA-binding proteins	L	Replication, recombination and repair	K07466|1|0.0|1820|pper:18777016|replication factor A1	GO:0006310//DNA recombination;GO:0006281//DNA repair;GO:0006260//DNA replication	GO:0008270//zinc ion binding;GO:0003677//DNA binding	GO:0005634//nucleus	MAVKLTEGAIMKICTGEYHDETWKPILQVLDVRMVNTARSGAQPGPDNERYRVLISDGSHHQQGMLGTQKNTLVQQGLLQKGSIVCLKQFTCTQVQNRLIIIIIELDLVLDKCDLIGEPVAGPKYLNAQSSGALPGNAQSIGGSAHSGGAVHQTVTKATLEQPRVNQSFGSAYSGGSDPGRHATMSTTPNHPKPEPGFGFPGSAPLSGSYSNQNTGFRSPRPEVPQPTLNAYARPPQPTYQQPSPTYPNRGPVAKNEAPPRIMPIAALNPYQGRWTIKARVTAKGELRHYSNPRGDGKVFSFDVLDSHGGEIRATCFNAVADQFYNQIEVGKIYLISKGSLKAAQKAFNNLNNDHEITLDHASIIQPCFEDDDSIPKQNFHFCRISDVEGLNNNSIVDV…
Prupe.5G024600.1.p	1.73062	0.400555	0.0124419	0.216627	Up	XP_007210511.1	phosphoribulokinase, chloroplastic [Prunus persica]	81.01	0	sp|P26302|KPPR_WHEAT	Phosphoribulokinase, chloroplastic OS=Triticum aestivum PE=2 SV=1	At1g32060	681	0	KOG4203	Armadillo/beta-Catenin/plakoglobin	TZ	Signal transduction mechanisms;Cytoskeleton	K00855|1|0.0|859|pper:18778041|phosphoribulokinase [EC:2.7.1.19]	GO:0043097//pyrimidine nucleoside salvage;GO:0005975//carbohydrate metabolic process;GO:0006206//pyrimidine nucleobase metabolic process	GO:0008974//phosphoribulokinase activity;GO:0004849//uridine kinase activity;GO:0005524//ATP binding	GO:0005829//cytosol;GO:0009507//chloroplast	MAICAVYTTTQLNPTCSFSTPASKTQTQLGFGLGFCQKQQVVFYKRSQSNSRRASVSLITCSAGGQETVVIGLAADSGCGKSTFMRRLTSVFGGAAEPPKGGNPDSNTLISDTTTVICLDDYHSLDRTGRKEKGVTALDPRANNFDLMYEQVKAIKEGKAVDKPIYNHVSGLLDPPELIKPPKILVIEGLHPMYDQRVRDLLDFSIYLDISNEVKFAWKIQRDMAERGHSLESIKASIEARKPDFDAYIDPQKQYADAVIEVLPTQLIPGDNEGKVLRVRLIMKEGVKFFNPVYLFDEGSTISWIPCGRKLTCSYPGIKFTYGPDTYFGNEVSVLEMDGQFDRLDELIYVESHLSNISTKFYGEVTQQMLKLSDFPGSNNGTGLFQTIVGLKIRDLFEQ…
Prupe.5G034600.1.p	10.3595	7.19425	0.0105317	0.00182567	Up	XP_007208918.1	putative gamma-glutamylcyclotransferase At3g02910 [Prunus persica]	50.57	4e-52	sp|Q9M8T3|Y2910_ARATH	Putative gamma-glutamylcyclotransferase At3g02910 OS=Arabidopsis thaliana GN=At3g02910 PE=2 SV=2	At3g02910	164	6e-52	KOG4450	Uncharacterized conserved protein	S	Function unknown	K19761|1|9e-130|364|pper:18776401|gamma-glutamylaminecyclotransferase [EC:2.3.2.-]	-	-	-	MAEGLKDDAKPHLIFTYGTLKQGFHNHKLTQDLINHDDAVLLGPYITRHSYPLVCGPYGIPYLINLPGSGHQVKGELYSVSTRGLARLDELEGTSIGHYERLPVDVMNADDDIVSVEAQAYYAHRSFGPAMWERIGKAGLSEFTEKEAKGYVKRQDRPCQGRAILEDVRHFVSGM
Prupe.5G035400.1.p	-10.2055	6.49559	0.00029471	0.214073	Down	XP_020419289.1	transcription factor MYC2 [Prunus persica]	54.24	0	sp|Q39204|MYC2_ARATH	Transcription factor MYC2 OS=Arabidopsis thaliana GN=MYC2 PE=1 SV=2	-	-	-	-	-	-	-	K13422|1|0.0|1420|pper:18777327|transcription factor MYC2		GO:0046983//protein dimerization activity	-	MTDYRIPPTMNLWTDDNASLMEAFMSSSDLTSFWAAPSAQPTPQPAHPQAQPQSSASTSDYPKAAAVAPSQPSITPFNQETLMQRLQALIEGARESWTYAIFWQSSYDYSGGTVLGWGEGFYKDERDKGKAKAKTTTSAADQEYRKKVLRELNSLISGADTSADDAVVDQEVTDTEWFFLVSMTQSFVPGGGLPGQAFFHSTPVWVAGDRLAASPCERARQGQLFGLQTMVCVPTANGVVELGSTELIYQSSDLTNKVRVLFNFNNLEVGSWPMGGGGADQGENDPSSLWINDPSSTTIEVKDPVNMAPVTSAPTSTSTQPVSKPIQFESHQPSSSSLSENPSAIQLQQSQQQQQVQQQTQSFFTRELNFSDYGYDGSSGKNSNSNSHSLKPESGEILS…
Prupe.5G052700.1.p	-10.3451	7.15196	2.30645e-05	0.255294	Down	XP_007209203.1	alpha-1,3/1,6-mannosyltransferase ALG2 [Prunus persica]	27.45	7e-12	sp|H6TFZ4|SUS5_ORYSJ	Sucrose synthase 5 OS=Oryza sativa subsp. japonica GN=SUS5 PE=2 SV=1	At1g78800	655	0	KOG0853	Glycosyltransferase	M	Cell wall/membrane/envelope biogenesis	K03843|1|0.0|849|pper:18778069|alpha-1,3/alpha-1,6-mannosyltransferase [EC:2.4.1.132 2.4.1.257]			GO:0016021//integral component of membrane	MAKKGSSKLNIAIIHPDLGIGGAERLVVDAAVELASHGHKVHVFTAHHDKNRCFEETISGTFPVTVYGAFLPRHIFYHLHALCAYLRCLFVAVCVLVMWPSFDVILADQVSVVIPLLKLKKSTKVLFYCHFPDLLLAQHTTILRRIYRKPIDFIEEMTTGIADKILVNSKFTASMFAKTFKRLDARGVQPAVLYPAVNVNQFDEPTDSYKLNFLSINRFEKKKNIDLAILAFSMLQTLGGDVLQGPNLAEASLTIAGGFDKRLKENVEYLEELRSLAKREGVSSQVNFITSCSTAERNALLSQCLCVLYTPKDEHFGIVPLEAMAAHKPVIACNSGGPVETVKDGVTGFLCEGNPREFSLAMAKLIQDPQMAQRMGTEARKHVTESFSTKIFGQNLNQY…
Prupe.5G058300.1.p	-10.3003	6.93343	0.00388257	0.633313	Down	XP_007209875.1	GATA transcription factor 26 [Prunus persica]	53.57	2e-162	sp|Q8W4H1|GAT26_ARATH	GATA transcription factor 26 OS=Arabidopsis thaliana GN=GATA26 PE=2 SV=1	At4g17570	484	8e-167	KOG1601	GATA-4/5/6 transcription factors	K	Transcription	K21630|1|3e-06|53.9|soe:110780560|GATA-type zinc finger protein 1		GO:0003700//DNA binding transcription factor activity;GO:0043565//sequence-specific DNA binding;GO:0008270//zinc ion binding	-	MGKQGPCYHCGVTSTPLWRNGPPDKPVLCNACGSRWRTKGTLANYTPLHARAEPDDYEDHRVSRVKSISINKNKEIKLVKRKQNPDSVMVGGVAADYAHGFRKVTDEDTSNRSSSGSAVSNSESCAQFGSADASDLTGPAQSMVWDSMVPSRKRTCIGRPKPSPVERLTKDLYTILHEQQSSYFSGSSEEDLLFECETPMVSVEIGHGSVLMRHPSSITREEESEASSLSVDNKQCHINEAYSHPATLHVHNNKGVIMTSTVTGKMNNLAGQGMQQEPLKRDKSQYDNFQILGNHNSPLCHVDLNDILNFEEFTRQLTNEEQQQLLKHLPPVDVVKFPYSLKSMFDSPQFRENSTSFQQLLAEGVFDISFLGAKTEDCKTLKRLVLSNSSKSKWVERYH…
Prupe.5G070800.1.p	-1.35229	0.329358	0.00341021	0.163788	Down	XP_007209957.1	probable aspartyl protease At4g16563 [Prunus persica]	63.39	1e-176	sp|Q940R4|ASP63_ARATH	Probable aspartyl protease At4g16563 OS=Arabidopsis thaliana GN=At4g16563 PE=2 SV=1	At4g16560_1	447	4e-153	KOG1339	Aspartyl protease	O	Posttranslational modification, protein turnover, chaperones	K01379|1|2e-55|196|sind:105170058|cathepsin D [EC:3.4.23.5]!K01381|4|2e-50|182|cqi:110730256|saccharopepsin [EC:3.4.23.25]		GO:0004190//aspartic-type endopeptidase activity	GO:0009505//plant-type cell wall	MASALFLILCFTHFFLSCSQPLYLPLTHTLSQTQFNSTQHLLKSTTTRSARRFHHHHRGHNRQTNQVSLPLAPGSDYTLSFTLNSSPPQPVALYMDTGSDLVWFPCSPFECILCEGKPNSTNPPPKIPKNAAVSCDSRSCSAAHSFLSSANLCAISHCPLDSIEISECSSFSCPPFYYAYADGSFIAKLYKHSLSIPMSTPALVLRNFTFGCSHSSLGEPIGVAGFGRGLLSLPAQLSTFSPHLATQFSYCLVSHSFDQDRVRRPSPLILGPYDQKQKRFGDGAGGSVEYAYTSMLDNPKHPYFYSIGLAGVSVGKRVFPAPEILQGVDKNGNGGIVVDSGTTFTMFPQGFYNSLVAEFDRRVGRVHERATRVEDETGLGPCYYYEKVVDVPAVTLHFA…
Prupe.5G071200.1.p	1.59499	0.500584	0.0128757	0.220267	Up	XP_007209602.1	heat shock 22 kDa protein, mitochondrial [Prunus persica]	63.78	6e-71	sp|P46254|HS22M_PEA	Heat shock 22 kDa protein, mitochondrial OS=Pisum sativum GN=HSP22 PE=2 SV=1	At5g51440	178	2e-56	KOG0710	Molecular chaperone (small heat-shock protein Hsp26/Hsp42)	O	Posttranslational modification, protein turnover, chaperones	K13993|1|9e-149|415|pper:18776383|HSP20 family protein	-	-	-	MASSVSILLRRASAPTLFSKLSSPIRSASVSPLVSRSFNSNAQVTSYDQDDRRVPVDRSTTDRSPFRRRDLGPTFFSDVFDPFSPTRSLSQVLNMMDQITDNPFFAGSRRGWDVKENEEALFLRMDMPGLDKEDVKISVEQNTLVVKGEDKDSEDEEGGGRRFSSRLDLPPNLYKLDSIRAEMKNGVLKLAIPKVKEDERKDVFEVKVE
Prupe.5G076300.1.p	-10.3024	6.94354	2.37608e-05	0.0011185	Down	ONI06720.1	hypothetical protein PRUPE_5G076300 [Prunus persica]	78.7	0	sp|P49045|VPE_SOYBN	Vacuolar-processing enzyme OS=Glycine max PE=2 SV=1	At1g62710	705	0	KOG1348	Asparaginyl peptidases	O	Posttranslational modification, protein turnover, chaperones	K01369|1|0.0|1031|pper:18775706|legumain [EC:3.4.22.34]		GO:0008233//peptidase activity	-	METPPVACTFTLGPPTQSPSPHVSKPLSSFACTSHQTTPHPATSPVSTFYTLTPPFSSISTHHLSLFFISSFSSPPVSKFSPWVFFMAVVQYQSRLILLLVLFVLLVGGGRVARLDLWDSTIRLPSDKDKPEDANHKEAGTRWAVLVAGSSGYGNYRHQADVCHAYQLLKKGGLKEENIVVFMYDDIANHEINPRPGVIINHPQGQDVYAGVPKDYTGKQVTAANLYAVLLGDKKAVKGGSGKVVDSKPNDRIFLYYSDHGGPGVLGMPNMPFLYAMDFIQVLKKKHASGSYKEMVIYVEACESGSIFEGIMPSDLNIYVTTASNAQENSFGTYCPGMDPSPPPEYITCLGDLYSVAWMEDSERHNLKKETIKQQYQNVKKRTSNSNNYDVGSHVMQYG…
Prupe.5G079700.1.p	-1.56551	0.5435	0.0236374	0.260369	Down	XP_007209578.1	peptidyl-tRNA hydrolase ICT1, mitochondrial [Prunus persica]	-	-	-	-	At1g62850	179	6e-58	KOG3429	Predicted peptidyl-tRNA hydrolase	J	Translation, ribosomal structure and biogenesis	K15033|1|3e-164|456|pper:18776440|peptidyl-tRNA hydrolase ICT1 [EC:3.1.1.29]		GO:0003747//translation release factor activity	-	MAVLRTTTNMILTHILQPYLSFPPSIRTTLIRSSNGGIRIGSVRCAASNSGSGGNKVSARLSQVNQLLQAAEERALSADTQPPPKITLDHVTVSFARSGGPGGQNVNKVNTKVDMRFNLQKAYWLSEWIRERILQMEKNRINKDGELVISSTKTRTQKGNIEDALEKLQAIIDAASYVPPPPSEEQKKKIAKMAAIGEQKRLKSKKVLSDKKAFRRSRDSWD
Prupe.5G093800.1.p	-1.08954	0.312983	0.0253254	0.261746	Down	ONI06994.1	hypothetical protein PRUPE_5G093800 [Prunus persica]	92	1e-10	sp|G5DC91|TLP1_MANZA	Thaumatin-like protein 1 OS=Manilkara zapota GN=TLP1 PE=1 SV=2	-	-	-	-	-	-	-	-	-	-	-	MSTRRSLSTSLLTSLIKPDRTLSASEYSLLSIKRDASLASTRCRRKVRFSGKSEDQISDSYPQDDKTSLFTCPGGTNYKVVFCP
Prupe.5G098800.1.p	-10.3862	7.36364	0.000323543	0.792342	Down	XP_007209286.1	AT-hook motif nuclear-localized protein 5 [Prunus persica]	52.48	9e-103	sp|Q8GXB3|AHL5_ARATH	AT-hook motif nuclear-localized protein 5 OS=Arabidopsis thaliana GN=AHL5 PE=1 SV=1	-	-	-	-	-	-	-	K23047|1|2e-24|108|bna:106447564|E3 ubiquitin-protein ligase UNKL [EC:2.3.2.27]		GO:0003677//DNA binding	GO:0016021//integral component of membrane	MDGREAMGLSGGSAQYYIHRGGVGGSMPGSQAGGGLHTPPGFRHMSNTVLQPQSNVRVSSVGSTFSVEPSRPNFPHHGISMNVTPGVPSGEPVKKKRGRPRKYGPDGPVSLGLSPMSATPNPRPGSTSPTPKRSRGRPPGSGRKQQLATLGDWMNTSAGLAFAPHVITIGAGEDIAAKLLLFSQQRPRALCILSGSGTASSVTLRQPASTGVSVTFEGRFQILCLSGSYLVAEDGGPRNRTGGISVSLSSPDGHVIGGAVAMLIAATPVQVVLCSFVYGGSKTKNKQVAGPNSDENSEPQHNEKLALPSNTPPTQNYNPSGAGIWPGSRQVDLRNPHTGIDLTRG
Prupe.5G100400.1.p	10.4756	7.79607	2.23438e-05	0.000118828	Up	XP_020419882.1	kinesin-like protein KIN-14J [Prunus persica]	53.18	0	sp|B3H6Z8|KN14J_ARATH	Kinesin-like protein KIN-14J OS=Arabidopsis thaliana GN=KIN14J PE=1 SV=1	At1g63640	1093	0	KOG0239	Kinesin (KAR3 subfamily)	Z	Cytoskeleton	K10406|1|0.0|2460|pper:18776838|kinesin family member C2/C3	GO:0007018//microtubule-based movement	GO:0008017//microtubule binding;GO:0005524//ATP binding;GO:0003777//microtubule motor activity	-	MNTQSESHKDENGGSKSHKDENGGSKSHKDDKGGFEIINGTRGENAELVESFGSTIEGNQILSLVEWLNFIVPYLRLPLDASEEELRACLIDGTVLCRILNKLCPGSVELGGSSDPGFANITRFLAAVDELGFPRFELLDLEQGSMVPVLHCLSALKASFDFGFWGENTKNQTKTENYLLEVESLKGIDRSRGDVSTCGQQSTQNREDTGGNIIDSTSQVTDPSAALVHHIGQQLKQGTLVDLSSAKILESIKSTSLDNASTRSLFNVGNRILDDSIDRNNGDVPNRVAYILRKVMQVIEQRFANQAVNLRIQNNIYKAREEKFLLKIKVLETLASGTTEENEVVLKLLQSMKIEKFDIEEKKKLEEQDAVRLKEEKDRRDKEISTLKQELEMAKSRHE…
Prupe.5G102900.1.p	10.3827	7.31724	0.0225245	0.0270443	Up	XP_007209129.1	uncharacterized protein LOC18777266 [Prunus persica]	50	2e-47	sp|Q9SRE5|Y1666_ARATH	Uncharacterized protein At1g76660 OS=Arabidopsis thaliana GN=At1g76660 PE=2 SV=1	-	-	-	-	-	-	-	K02218|1|8e-15|79.3|zju:107412057|casein kinase 1 [EC:2.7.11.1]	-	-	-	MRRVNGESRTGNNALETINAAASAIAAAENRVPQATVQKRRWGSWWSMYWCFGFQRHKKRIGHAVLVPETTDRGGDAPRAENPIQTPSIVLPFVAPPSSPASFLQSEPPSATQSPAGFFSLTASMYSPSGPTSIFAIGPYAHETQLVSPPVFSTFTTEPSTAPFTPPPESVHLTTPSSPEVPFAQLLDPHFRNGEGGQRFPLSHYEFQSYQLYPGSPVGQLISPSSGISGSGTSSPFPDLEFAARGHHFLEFRTGDPPKLLNLDILSTRDWGSRLGSGSVTPDGAKSTSSDGFLLKPQTPEVVLNPRSNNRGRNNDISINHRVSFELSSEEVIRCVEKKPVALAEAVSTSLEDTEKAQSKEDPSKVVSSSICPVGETSNDAAEKAVADGEEAQLHPKQR…
Prupe.5G127900.1.p	-10.384	7.35027	0.000184028	0.837006	Down	XP_020419510.1	uncharacterized protein LOC109949174 [Prunus persica]	45.76	1e-30	sp|Q9FKZ1|DRL42_ARATH	Probable disease resistance protein At5g66900 OS=Arabidopsis thaliana GN=At5g66900 PE=3 SV=1	At3g05920	57	3e-09	KOG1603	Copper chaperone	P	Inorganic ion transport and metabolism	K05925|1|2e-172|521|pavi:110774093|mRNA m6A methyltransferase [EC:2.1.1.348]!K13415|3|8e-138|446|mdm:103401427|protein brassinosteroid insensitive 1 [EC:2.7.10.1 2.7.11.1]	-	-	-	MALALVGGAAIGALFGALYDVVKESMGRTVLQYKPLLGDLKFTLESLRPRIVQQIGDHNVELGLPNDDIESLQRQMEEGIVLVRKLSNIGMWNCYAWGSCCNCTKPSYSDQLVDLDRSLRILLEILKLQEARDVKEVLLLARKIHDKQDELERRMSDLLKVQQEAGDVGGSSGSNTGTTIQQGNEGNGGHQVAPLGGVGGAATLGAVFGVLFDTVARVKDKTMMLKRPLEDVKSTLDSLKPLIEEIAAYNKVLNLPKEELEKVSFQMEEGVELLHKCSKVRQWTSCKRYEYANKLLGLDESLQRLLNILRVQLARDVRESLVSVSKIEKVIDQIEESGTVQLQNHPTEIEDSCDVLEHPQPEVGLSVQGTRDVNETLDSAAKIEVGVKRIEGSGDVQGQ…
Prupe.5G128800.1.p	-10.5302	8.13217	2.02696e-05	0.000118828	Down	XP_007211072.1	uncharacterized protein LOC18776231 isoform X1 [Prunus persica]	-	-	-	-	-	-	-	-	-	-	-	K07897|1|1e-07|56.2|apro:F751_6593|Ras-related protein Rab-7A			GO:0016021//integral component of membrane	MVSIHFSSTIHRLKPPPPHPSQLCNLKPSFLSKSNKSPNTRKKIGTRYRTCRAEFSNDAPFAAAIGACMLSSLVLPVTTPEDDGGGGSPMDSTDARFAVMGIVSFIPYFNWLSWIFAFLDTGKRRYAVYALVYLVPYLRSNLSLSPEESWLPIASIVLCIIHVQLEASIKNGDLQGFQLFSEAAKHTSFTSRKKDLTGHEGTSEEGRKRENKNLPSSEEIGRWGVPKNPLQDHEHSNEDWDDDERSKH
Prupe.5G131300.1.p	-10.2294	6.60058	2.50026e-05	1.92121e-05	Down	XP_007209935.1	endoglucanase CX [Prunus persica]	78.66	0	sp|P05522|GUN1_PERAE	Endoglucanase 1 OS=Persea americana GN=CEL1 PE=2 SV=1	-	-	-	-	-	-	-	K01179|1|0.0|639|ghi:107924647|endoglucanase [EC:3.2.1.4]	GO:0030245//cellulose catabolic process	GO:0008810//cellulase activity	-	MAYAATFSLVTQVLGLTLCLLSLCCSAFTPQDYSDALEKSILFFEGQRSGKLPANQRATWRANSGLSDGSSYHVDLVGGYYDAGDNVKFGLPMAFTTTLLAWSVIEFGDSMHNQIENAKDAIRWSTDYLLKAATSTPGALYVQVADPNADHQCWERPEDMDTPRNVYKVSTQNPGSDVAAETAAALAAASIVFKDSDPSYSGKLLHTAMKVFDFADRYRGSYSDSIGSVVCPFYCSYSGYHDELLWGASWIHRASQNSSYLAYIKSNGHILGADDDGFSFSWDDKRPGTKVLLSKNFLEKNNEEFQLYKAHSDNYICSLLPGTSNFQAQYTPGGLLYKASESNLQYVTSTTLLLLTYAKYLRTNGGVATCGSSKVTAETLISEAKKQVDYILGNNPAKI…
Prupe.5G137500.1.p	1.12711	0.398647	0.022241	0.257698	Up	XP_007209271.1	transmembrane protein 120 homolog [Prunus persica]	-	-	-	-	At1g33230	525	0	KOG4758	Predicted membrane protein	R	General function prediction only	-			GO:0016021//integral component of membrane;GO:0016020//membrane	MGEAKRNSSSSSSNSDEDIQAQVAKAVEGVKELQESAASFISKTSTDEQALRQRSQSLDSSIRLLRSQLYSLLSSKALDPKLAEKLEEDLQRATCVLADGDAASFLPGKAQGGRFLRMFLGPITVRSSSKDIQLKVKEEYNAYRDRTALLFLLFPATLLILRSWLWDGCLPTFPVQAYQAWLLFLYTGLALRENILRVNGSDIRPWWIYHHYCAMFMALVSLTWEIKGQPDCSQKQRGVQLFLQWAMMQGVAMLLQNRYQRQRLYTRIALGKAKRMDVVWGETAGVDGQLWLLCPILFILQGFEAYVGLQLLKTALVGVASEWQVSFCGVLLVLMAVGNFVNTVQTLMVKSRFKAKMKRTKSKQDL
Prupe.5G144500.1.p	10.5114	7.99173	2.17967e-05	0.000118828	Up	XP_007209152.1	sialyltransferase-like protein 2 isoform X1 [Prunus persica]	78.38	0	sp|Q8RY00|SIA2_ARATH	Sialyltransferase-like protein 2 OS=Arabidopsis thaliana GN=SIA2 PE=2 SV=1	At3g48820	667	0	KOG2692	Sialyltransferase	G	Carbohydrate transport and metabolism	K03368|1|7e-137|395|oeu:111377827|beta-galactoside alpha-2,3-sialyltransferase (sialyltransferase 4B) [EC:2.4.99.4]!K06614|3|4e-59|197|pvu:PHAVU_001G0849001|alpha-N-acetyl-neuraminate alpha-2,8-sialyltransferase (sialyltransferase 8D) [EC:2.4.99.-]!K00780|4|1e-10|67.4|bpg:Bathy14g02010|beta-galactoside alpha-2,3-sialyltransferase (sialyltransferase 4A) [EC:2.4.99.4]!K00779|5|7e-10|65.9|bpg:Bathy1…	GO:0009860//pollen tube growth;GO:0006486//protein glycosylation;GO:0009846//pollen germination	GO:0008373//sialyltransferase activity	GO:0005802//trans-Golgi network;GO:0005768//endosome	MRLLQLAFVVSLLFGLVAILIYITGVSDLYETHRLTEEDVEALQSLQTGFQKCVAANGLGLQASIGKDYCQVTMQFPGDTIPKWKDAKTGELEGLSYEFNLCEAVATWEQVRNSTTILTREFIDSLPNGWENYAWHRINKGDRLNRCKNKTLCVEKLSLVLPETPPYVPQMFGRCAVIGNSGDLLKTRFGKEIDGYDAVIRENGAPIQNYTDHVGKKSTFRLLNRGSAKALDKVVELDESRKEVLIIKTTIHDAMNQMIRELPIKNHVYLLLGASFGSAAKGTGLKALEFALSICDSVDMYGFTVDPGYKEWTRYFSESRQGHTPLHGRAYYQMMECLGLIKIHSPIRADPNRVVQWVPDRSAVTAARIASEKLLRRIGAGYAHPLRMCSIITKQVKIK…
Prupe.5G146200.1.p	1.01489	0.254348	0.00400435	0.163788	Up	XP_007209810.1	mitochondrial import inner membrane translocase subunit TIM8 [Prunus persica]	81.08	1e-35	sp|Q9XGY4|TIM8_ARATH	Mitochondrial import inner membrane translocase subunit TIM8 OS=Arabidopsis thaliana GN=TIM8 PE=1 SV=1	At5g50810	115	2e-35	KOG3489	Mitochondrial import inner membrane translocase, subunit TIM8	U	Intracellular trafficking, secretion, and vesicular transport	K17780|1|2e-53|164|pavi:110757250|mitochondrial import inner membrane translocase subunit TIM8	GO:0015031//protein transport	GO:0046872//metal ion binding	GO:0005758//mitochondrial intermembrane space;GO:0005739//mitochondrion	MDPSSMNNPELLQFINQEKERAMVNEMVGKLTNVCWDKCITGTPGSKFSSSESACLANCARRYLDMSMIIMKRFQNMQ
Prupe.5G147000.1.p	10.6305	8.68367	0.000185278	0.00203564	Up	XP_020420495.1	protein MICRORCHIDIA 7 [Prunus persica]	55.01	0	sp|F4KAF2|MORC4_ARATH	Protein MICRORCHIDIA 4 OS=Arabidopsis thaliana GN=MORC4 PE=1 SV=2	At5g50780	840	0	KOG1845	MORC family ATPases	D	Cell cycle control, cell division, chromosome partitioning	-	-	-	-	MEATVKQELLETSNVPHPTGKPNGVTSKVVPPPGWVIDLSTSSSSSSSSGESDSDDSDDVGGVSGGLAKKRKRDGMGVVLPVGFLSPLPPEGVAPMLPAPDAAVTRVENTGVVSRPRCKQFWKAGDYEGAPCGNWESTAGGMDHVRVHPKFLHSNATSHKWALGAFAELLDNALDEVCSGATYVNLDMVENKKDQSRMLLIEDNGGGMDPDKMRHCMSLGYSAKSKVANTIGQYGNGFKTSTMRLGADVIVFSRCNGKDGKSATQSIGLLSYTFLKSTGKEDIVVPMLDYERRQGAWSKMLRSSLSDWNKNVETIVQWSPFSNEEDLHHQFYMMKNHGTRIIIYNLWEDDEGQLELDFDADPHDIQIRGVNRAEKNIQMAKEFPNSRFFLTYRHSLRSY…
Prupe.5G161100.1.p	-10.5121	8.03027	2.05283e-05	0.656455	Down	XP_007209189.1	BTB/POZ and TAZ domain-containing protein 1 [Prunus persica]	59.09	6e-138	sp|Q94BN0|BT2_ARATH	BTB/POZ and TAZ domain-containing protein 2 OS=Arabidopsis thaliana GN=BT2 PE=1 SV=1	At5g63160	396	1e-137	KOG1778	CREB binding protein/P300 and related TAZ Zn-finger proteins	K	Transcription	K10523|1|6e-120|348|mdm:103424463|speckle-type POZ protein!K02987|3|6e-28|113|zma:109940410|small subunit ribosomal protein S4e	GO:0006355//regulation of transcription, DNA-templated	GO:0004402//histone acetyltransferase activity;GO:0003712//transcription cofactor activity;GO:0008270//zinc ion binding	GO:0005634//nucleus	METNPTVAINISDDLYGLSGTKSDPRDLPEPDVHIVTCDALRIPAHSSILASVSPVLENIIDRPRKHRSSERVIPITGVPNDAVLAFLRFLYSSRCTEEHMEKYGIHLLALSHVYLVPQLKHRCIKELGQRLTIENVVDVLQLAKMCDAADLYLKCLKLVANHFKAVENTEGWKFLQDHDPWLELDILQFIDETASRKKKTRKLREEQRLYLQLSEAMECLEHICKEGCTSVGPYDMEPGHNRGPCSKFSTCQGLQLLIQHFATCKRRVNGGCLRCKRMWQLLRLHSSMCDQPDSCRVPLCRQFKLKMQQEKKKDDARWKLLVRKVVSARTISSLSLPKRKREEELGETRCSHGIRTFRL
Prupe.5G164500.1.p	-10.5555	8.29372	0.00106413	0.71866	Down	XP_007209613.1	high-affinity nitrate transporter 3.1 [Prunus persica]	53.77	7e-70	sp|Q9FGS5|NRT31_ARATH	High-affinity nitrate transporter 3.1 OS=Arabidopsis thaliana GN=NRT3.1 PE=1 SV=1	-	-	-	-	-	-	-	-	GO:0010167//response to nitrate;GO:0015706//nitrate transport		GO:0016021//integral component of membrane	MASTGILLASLLLLSCLAETSHGVLLSSLKQTLIVTASHKEGQVYKTGIDKLTVSWGLNQSFPAGSDSTYKTIKVKFCYAPVSQVDRGWRKTVDSLNKDKTCQFKVVARPYSSSNQSFEWTIERDVPSATYFLRAYAYDAADVEVAYGQTTDAQKETNLFVVQAITGRHASLDIASVCFSVFSVLSLAGFFIAEKRKAKSSHEK
Prupe.5G170600.1.p	-10.4521	7.70289	2.14058e-05	5.95042e-05	Down	XP_007209269.1	uncharacterized protein LOC18776192 isoform X2 [Prunus persica]	-	-	-	-	-	-	-	-	-	-	-	-			GO:0016021//integral component of membrane	MALKFGSSFSCLATSLVSHCQARRGSQLSLSQPPYGSQKHDAQQLRYAKGKSCIFIQRVQKSSNRIPKSQSVLFAVSEDQSQYSEIKPDAAEQENHRPDSEDIFPASGSYFHFDGTDGKPGLISFYNRPYKREEEVSTNNPERNQNNLLWFIGPAVLLASFIFPSLYLRKILSTVFEDSLLTDFLILFFTEAIFYSGVAVFLLLIDHLRRPTEPELIVHSNRTLTPQLGQRISSVAALVLSLIIPMVTMGYVWPWTGPAASATLAPYLVGIVVQFAFEQCARYKKSPSWPVIPVIFQVYRLHQLNRAAQLVTALSFTVRGAETTSHNLAINSSLGTLLNVLQCLGVICIWSLSSFLMRFFSSTTVAAQ
Prupe.5G203600.1.p	-10.5305	8.13361	2.0266e-05	0.193889	Down	XP_007209917.1	flavonoid 3'-monooxygenase [Prunus persica]	75.84	0	sp|Q9SBQ9|F3PH_PETHY	Flavonoid 3'-monooxygenase OS=Petunia hybrida GN=CYP75B2 PE=2 SV=1	At5g07990	738	0	KOG0156	Cytochrome P450 CYP2 subfamily	Q	Secondary metabolites biosynthesis, transport and catabolism	K05280|1|0.0|1043|pper:18777306|flavonoid 3'-monooxygenase [EC:1.14.14.82]		GO:0004497//monooxygenase activity;GO:0016705//oxidoreductase activity, acting on paired donors, with incorporation or reduction of molecular oxygen;GO:0005506//iron ion binding;GO:0020037//heme binding	-	MFILIFITVVFAALLYRLLFSGNRHSLPLPPGPKPWPIVGNLPHLGPVPHHSLAALARQYGPLMHLRLGFVDVVVAASASVASQFLKTHDTNFSSRPPNSGAKHLAYNYHDLVFAPYGPRWRMLRKISSVHLFSGKALDDLRHVRQEEVAVLAHGLAGAGSKPVNLAQLLNVCTVNALGRVMVGKRLFGDGSGSGDEKADEFKEMVVEMMVLAGVFNIGDFIPALEWLDLQGVAAKMKKLHKRFDAFLTAIVEEHKKSSGGKHGDMLTTLLSLKEDADGEGAKLTDTEIKALLLNMFTAGTDTSSSTVEWAIAELLRHPKILAQVQQELDQVVGRDQLVTELDLPNLTYLQAVIKETFRLHPSTPLSLPRMASESCEINSFHIPKGATLLVNVWAISRD…
Prupe.5G206000.1.p	10.3165	7.0019	0.00145477	0.152892	Up	XP_008240009.1	PREDICTED: mitochondrial import receptor subunit TOM5 homolog [Prunus mume]	57.41	7e-20	sp|Q9SD80|TOM5_ARATH	Mitochondrial import receptor subunit TOM5 homolog OS=Arabidopsis thaliana GN=TOM5 PE=1 SV=3	-	-	-	-	-	-	-	-			GO:0005742//mitochondrial outer membrane translocase complex;GO:0009536//plastid	MADFPISLDKAKYFLQSQYHDEEKWALNMKLLRAAGLFAGSILLMRSYGDLMAI
Prupe.5G217300.1.p	10.2908	6.85819	2.53996e-05	0.000118828	Up	XP_007209075.1	DNA mismatch repair protein MSH2 [Prunus persica]	75.8	0	sp|O24617|MSH2_ARATH	DNA mismatch repair protein MSH2 OS=Arabidopsis thaliana GN=MSH2 PE=1 SV=1	Hs4557761	730	0	KOG0219	Mismatch repair ATPase MSH2 (MutS family)	L	Replication, recombination and repair	K08735|1|0.0|1952|pper:18777066|DNA mismatch repair protein MSH2	GO:0006298//mismatch repair	GO:0005524//ATP binding;GO:0030983//mismatched DNA binding	GO:0032300//mismatch repair complex	MDANFEDQSKLPELKLDAKQSQGFLSFFKTLPHDPRPIRLFDRRDYYTAHGENATFIAKTYYRTTTALRQLGSGLDGLSSVSVSKNMFETIARDLLLERTDHTLEIYEGSGSSWRLVKSGTPGNLGSFEDVLFANNDMQDTPVVVALLPNFRENGCTVGLGYVDLTKRVLGLAEFLDDSHFTNVESALVALGCKECLLPLESGKTSEIRTLHDALNRCGVMLTERKKAEFKMRDLVQDLSRLVKGSIEPVRDLVSGFEFAAGALGALLSYAELLGDESNYGNYSIQRYNLDSYMRLDSAAMRALNVLESKTDANKNFSLFGLMNRTCTAGMGKRLLHMWLKQPLLDVDEINSRLDLVQAFVEDPALRQDLRQHLKRISDIERLMHNLEKKRAGLQHIVK…
Prupe.5G233100.1.p	-10.1168	6.10437	2.7047e-05	1.89858e-05	Down	XP_007210282.1	probable auxin efflux carrier component 1c [Prunus persica]	72.71	0	sp|Q9C6B8|PINI_ARATH	Auxin efflux carrier component 1 OS=Arabidopsis thaliana GN=PIN1 PE=1 SV=1	-	-	-	-	-	-	-	K13947|1|0.0|1280|pmum:103338697|auxin efflux carrier family	GO:0055085//transmembrane transport;GO:0009734//auxin-activated signaling pathway		GO:0016021//integral component of membrane	MISLSDFYHVMTAVVPLYVAMILAYGSVKWWKIFTPDQCSGINRFVALFAVPLLSFHFISSNDPYNMNTRFIAADTLQKLIVLAVLAVWTKVSKRGCLEWTITLFSLSTLPNTLVMGIPLLKGMYGDFSGSLMVQIVVLQCIIWYTLMLFMFEYRGAKLLISEQFPDTAGSIVSIHVDSDIMSLDGRQPLETEAEIKEDGKLHVTVRKSNASRSDIFSRRSQGLSSTTPRPSNLTNAEIYSLQSSRNPTPRGSSFNHTDFYSMMAAGRNSNFGSSDVYGLSASRGPTPRPSNYEEDGTGVVSATGNKPRFYHGGQQGNNTTAHYPAPNPGMFSPTASKNVAAANNNSNAINAKRPNGQAQQKPEDGGKDLHMFVWSSSASPVSDVFGSNEYGTAHDQKE…
Prupe.5G235700.1.p	-10.0567	5.85843	0.0159528	0.903244	Down	XP_020419248.1	uncharacterized protein LOC18776615 [Prunus persica]	44.99	2e-110	sp|P0DO03|DJA8_ORYSJ	Chaperone protein dnaJ A8, chloroplastic OS=Oryza sativa subsp. japonica GN=DJA8 PE=1 SV=1	At3g17830	463	1e-158	KOG0715	Molecular chaperone (DnaJ superfamily)	O	Posttranslational modification, protein turnover, chaperones	K03686|1|0.0|1161|pper:18776615|molecular chaperone DnaJ	-	-	-	MPIIQSTCISNVLPIPNSAVPLPPYSLSCSTLSSRASAFFTRNSNPIFKPNYAPFLPTKSPRGAHLVIQAAGTDHYKTLNVPRSATLQEIKSSYRKLARKYHPDLNKGAGAEDKFKEISSAYEVLSDDEKRSLYDRFGEAGLQGEYDSSAMGSTGVDPFDVFDTFFGGSDGIFGGRGESGGFNFNLRNRGNQGLDIRYDLYLSFEESIFGVQREIEVSSVETCDNCGGTGAKSDNCIKSCTGCGGRGGVMKTQRTPFGMISQVSTCSKCGGDGRIITDPCQRCSGKGQVQSKRTMSVTIPAGVNDGATMQIQGEGNFDKKRGTVGDVFIVLHIDRKAGIHRDGLNLYSKIKIDYTEAILGTVIKVETVEGLKELQIPSGIQPGETVKLRRMGVPDMNKP…
Prupe.5G237700.1.p	10.302	6.92433	0.0300172	0.152892	Up	ONI09426.1	hypothetical protein PRUPE_5G237700 [Prunus persica]	63.87	5e-174	sp|Q9LVJ0|UVB31_ARATH	UV-B-induced protein At3g17800, chloroplastic OS=Arabidopsis thaliana GN=At3g17800 PE=2 SV=1	-	-	-	-	-	-	-	K09060|1|1e-84|276|oeu:111382929|plant G-box-binding factor	-	-	-	MEDKGGSQNVKIGNFALRPQKPLNCKRRRLPTLLIINYRVGLAELKMEAAATASVVQSSIAAFRPSNSIGRSGNLAANGPAGFLRLSPGFHFSIKHQFSISQPKVGHWRMGFGSRRCLVVRAAAASPSPDSTGSTSPIAPLQLESPIGQFLSQIMISHPHLVPSAVEQQLEQLQTDRDTEQKQEEPSASGTDLVLYRRIAEVKATERRKALEEILYTLVVQKFMDANVSLIPALTPSASDLSGRVDTWPSEEDKLEQLHSPEAYEMIQNHLALILGSRLGDSASLAQISKLRVGQVYAASVMYGYFLKRVDQRFQLEKTVKILPNALGAEDSNVQKSVGEDMRPGGEEESLQAGASHPEVTSWGGGISPGGFGNGIKPSRLRTYVMSFDGETLHRYATI…
Prupe.6G004700.1.p	-10.4186	7.5287	0.00016207	0.731132	Down	XP_007205298.1	transcription repressor MYB5 [Prunus persica]	46.01	9e-84	sp|Q38850|MYB5_ARATH	Transcription repressor MYB5 OS=Arabidopsis thaliana GN=MYB5 PE=1 SV=1	At3g13540	256	2e-83	KOG0048	Transcription factor, Myb superfamily	K	Transcription	K09422|1|0.0|815|pper:18773093|transcription factor MYB, plant		GO:0003677//DNA binding	-	MRNPSSSSSSSSSKAAAAAATATSIPTKITSSSSSKAAGTSGGSKTPCCIKVGLKRGPWTPEEDELLSNYINKEGEGRWRTLPKRAGLLRCGKSCRLRWMNYLRPSVKRGQIAPDEEDLILRLHRLLGNRWSLIAGRIPGRTDNEIKNYWNTHLSKKLISQGIDPRTHKPLNPDIHSSATVAAADMDSNINKAATVSSSKTNRFSSNTNPSPPPTSEPSEPVAHHHGAAPNTNGNNGNIVTNIANKENGYLVDDQELGTVVHGYANMTSSDHASAAAMGTLSLRSNGSNNGGALLGGNEEDDDMNCCADDVFSSFLNSLINEDPFSGQHHLQQQVLLQNGNNAHNAAAADGSDHHVPLVSSGAGATAPSTFGWESAVLMSSAFIQNDHHRVLNDQTE
Prupe.6G017700.1.p	-1.17216	0.458889	0.0432367	0.312581	Down	XP_007205817.1	octanoyltransferase [Prunus persica]	77.45	2e-138	sp|Q9SXP7|LIPB_ARATH	Octanoyltransferase OS=Arabidopsis thaliana GN=LIP2 PE=2 SV=1	At1g04640	387	3e-138	KOG0325	Lipoyltransferase	CH	Energy production and conversion;Coenzyme transport and metabolism	K03801|1|4e-175|484|pper:18775208|lipoyl(octanoyl) transferase [EC:2.3.1.181]	GO:0009249//protein lipoylation;GO:0006464//cellular protein modification process;GO:0009107//lipoate biosynthetic process	GO:0033819//lipoyl(octanoyl) transferase activity	GO:0005737//cytoplasm;GO:0005739//mitochondrion	MRVPRNLEVLKMGAISYLDALKLQEKLASNRKIHKIPDTLLSLQHPPTYTLGKRRTDHNLLIPESELKRIGAELHYTQRGGDITFHGPHQAILYPIISLRDIGLGARKYVENLESSMIELASLYGVKASPGKKCETGVWVGDRKIGAIGVRISYGITSHGLAFNIDPDLDYFKHIVPCGIADKEVTSLRRETDLVLPTEEVIQDQLISCFARQFGYSNLVWKDAASILSDNGETE
Prupe.6G025800.1.p	1.424	0.321963	0.00687353	0.185828	Up	ONH99350.1	hypothetical protein PRUPE_6G025800 [Prunus persica]	32.49	6e-40	sp|Q39211|NRPB3_ARATH	DNA-directed RNA polymerases II, IV and V subunit 3 OS=Arabidopsis thaliana GN=NRPB3 PE=1 SV=1	At1g60620	495	1e-175	KOG1521	RNA polymerase I and III, subunit RPA40/RPC40	K	Transcription	K03027|1|0.0|806|pper:18775391|DNA-directed RNA polymerases I and III subunit RPAC1	GO:0006351//transcription, DNA-templated	GO:0003899//DNA-directed 5'-3' RNA polymerase activity;GO:0046983//protein dimerization activity;GO:0003677//DNA binding	-	MSSDNEDTTSSSESEGADSVKENATLEFIENLSDVPMGRLPSNIEFQRTRVDCKADAPIHTDTFQYSGAYSSMRVENSFLDNFCDNFRVEVIRLTEDEMEFDMIGIDPALANAFRRILISEVPTMAIEKVLIANNTSVIQDEVLAHRLGLIPIKADPRLFEYAENNTASEKNTIVFKLHVCCERSGQRLSVKSKELIWLPNGSEFPLESQDSKTGSSSKPKTYTSFTCSQDSLPEFSSNPIAPALGDILIARLGPGQEIELEAHAVKGIGKTHSKWSPVTPVWYKMLPEIVLLEDIEDQQAEKLVAICPVKVFDIEDIGKAGKKRATVARPRACTLCRECIREGKGWENAISLQRKKDHFIFTIESSGVFPPEVLVTEAVKILEEKCDRVISDLS
Prupe.6G027700.1.p	10.9976	11.2002	0.0119875	0.000118828	Up	ONH99386.1	hypothetical protein PRUPE_6G027700 [Prunus persica]	56.71	1e-46	sp|F4I171|MD15A_ARATH	Mediator of RNA polymerase II transcription subunit 15a OS=Arabidopsis thaliana GN=MED15A PE=1 SV=1	-	-	-	-	-	-	-	K14972|1|8e-78|260|pavi:110760141|PAX-interacting protein 1	-	-	-	MDNNNWRPPQVGEPPIDAGDWRSQLQPDSRQRIVNKITDTLKRHLPFSGQEGLQEIRKIAVRFEEKIHTAATSQSDYLRKISLKMLSMETNSQHRMANSSQSNSAVGSFGVQPQVPYQGQLLSMQLSANQSLARQQLLSQNIPNNIPPASGLPQTPIPNLMDTHNERLLQGGELPMVAGNWRSQLLPDSRRRIVDKILNTLKRHLLVSGQEGIDELRRIAERFEERTYDSSSSQSDYLRRISLKMLTFEAKYQWTAPTAAPSNLKRHRVFP
Prupe.6G037300.1.p	-10.3297	7.07628	2.33125e-05	0.865034	Down	ONH99581.1	hypothetical protein PRUPE_6G037300 [Prunus persica]	-	-	-	-	At1g31300	250	2e-82	KOG4561	Uncharacterized conserved protein, contains TBC domain	TR	Signal transduction mechanisms;General function prediction only	-			GO:0016021//integral component of membrane	MLQESKPTTGQETVQSRNTEQNFTLQRNYRRTIKPTQYPQSSQLFTALEDFSFSLVYRLTRLISLLSFEGYHKLRKAQRVEWNNRGFSTVHAIAVAFSSFYLLLLSDTFHEDHRDELIISRRSTLSDTTLGISIGYFLADLGMIFWHFPALGGLEYVLHHALSMFSIFLSLVSGKGQIYILMVLFSESTTPFVNLRWYLDVAGKKNSNLYVINGVALFLGWLVARILLFIYFFIHMFIHFDQVKTIFPLGFYSLLLVPPVLAVMNLVWFWKIVKGLIKTVSKATHSQ
Prupe.6G037800.1.p	10.5425	8.16765	0.00994575	0.000118828	Up	XP_007205824.1	uncharacterized protein LOC18774506 [Prunus persica]	40.86	2e-14	sp|P51204|YCF54_PORPU	Uncharacterized protein ycf54 OS=Porphyra purpurea GN=ycf54 PE=3 SV=1	-	-	-	-	-	-	-	-			GO:0009579//thylakoid;GO:0009507//chloroplast	MSGVATLGQACWAAAGVKVKKAKTAISQAQIQNPKPKSLALPLSANCSRNLFSFSPKAITKPSSSSSVRTSVAAVDSDQLSSSDSAEKQKASRYYFVVANAKFMLDEEEHFQEQLCERLRYYGERNREQDFWLVIEPKFLDKFPNITKRLGRPAVALVSTNGPWITFMKLRLDRVLAESFEAESLEEALASTPTNIEFEKPEKWVAPYSKYESGWWGPFLPPGSNEEAKV
Prupe.6G038100.1.p	-10.1363	6.18788	2.66799e-05	0.132192	Down	XP_007207375.1	cytochrome P450 714C2 [Prunus persica]	50.96	0	sp|Q2QYH7|C14C2_ORYSJ	Cytochrome P450 714C2 OS=Oryza sativa subsp. japonica GN=CYP714C2 PE=2 SV=1	At5g24910	487	3e-168	KOG0157	Cytochrome P450 CYP4/CYP19/CYP26 subfamilies	QI	Secondary metabolites biosynthesis, transport and catabolism;Lipid transport and metabolism	K20661|1|0.0|1060|pavi:110750834|cytochrome P450 family 714 subfamily A polypeptide 1		GO:0004497//monooxygenase activity;GO:0016705//oxidoreductase activity, acting on paired donors, with incorporation or reduction of molecular oxygen;GO:0005506//iron ion binding;GO:0020037//heme binding	-	MELLQVDAKMLMSLVLLGFIGLLVRLYNGLVAKPKKLRSLLTKQGISGPPATLLLGNIMEIKNSRGSGNVFREGEAPTTHNCAALLFPFFEKWRKQYGEVFVFALGNTQILYANQPDAVREITTCTSLDLGKPTYQYKERGPLLGQGILTSNGASWAHQRKVIAPELYMEKVKGMINLITESTTTLINSWNSRIEAEGGVADIKIDSYIRSFSGDVISRACFGSNYSKGEEIFQKLRNLQEAMSKKIFLTGVPGMRHLPTKSNREAWALEKEASTLILQVVKERQAAGYEKDLLQMILEGARNTDLSPEATDRFIVDNCKNIYLAGYETTAVSATWCLMLLASNQKWQERVRAEVVQICQGQIPDNEMVRKMKQLTMVIQESLRLYPPVTVVSREAFKD…
Prupe.6G044900.1.p	10.387	7.34934	0.00123297	0.00750913	Up	XP_007206416.2	cationic peroxidase 1 [Prunus persica]	71.43	3e-162	sp|P22195|PER1_ARAHY	Cationic peroxidase 1 OS=Arachis hypogaea GN=PNC1 PE=1 SV=2	-	-	-	-	-	-	-	K00430|1|0.0|654|pper:18771961|peroxidase [EC:1.11.1.7]	-	-	-	MAFISHYNRFCFFVLLMLLRIASAQLSSDYYATTCPRALSVVRSSVINAVVKEHRMGASLLRLHFHDCFVNGCDASVLLDDTSNFTGEKTALPNVRSLRGFEVIDTIKSQLESLCPGVVSCADILAVAARDSVLLFGGPSWTVQLGRRDSTTASLSDANTELPSPSLDLKDLISSFSTKGFSAKEMVALSGSHTMGQARCQMFRDRIYNETNINSEFATFLKSNCTQSSGTDDNLSPLDITSPVFFDNAYFKNLVDSKGLLHSDQQLFSGGSTDSLVTTYSNSSGTFYTDFANAMLKMGNLSPLTGTSGQIRTNCRKTN
Prupe.6G055800.1.p	10.0231	5.70338	0.026035	0.0255258	Up	XP_007208077.2	U-box domain-containing protein 44 [Prunus persica]	31.03	1e-91	sp|Q9SFX2|PUB43_ARATH	U-box domain-containing protein 43 OS=Arabidopsis thaliana GN=PUB43 PE=2 SV=1	At1g76390	310	3e-91	KOG0167	FOG: Armadillo/beta-catenin-like repeats	S	Function unknown	K08332|1|1e-44|179|han:110918331|vacuolar protein 8		GO:0004842//ubiquitin-protein transferase activity	-	MTSSSSYSSSVSSAVDSIHTSLADLCAPHYHQSPFDLPRRFSGFANRLQLSLTHLTRATSSLDALPPSVHTAFKGIASDLAAALETLSFYRTKGKISVLINCLSLCDSLADRTVAISGWLALLDLAIQDLNLPDLRKKIADLSRDMKQAHFKVTEREERVHHTLQKEGRTTQSKTSKAVESAIIMDLARALGIDPENHDELSKQIRLLKNDVAGSNSVSERRILVSLERIVDNWAIRPNISAWKAGMEFEDDDVHISPFKNFLCPLTKEVMRYPVVLQSSQTYERTAINYWFERCLEDGRDPTCPVTGEVLGSLEMKPNIGLAGAIEEWVNRNVEILVKISVQHLSKEPPVVDCLEGVLDNVYNISEEYPSCRYKVRNAGVLVLIVKMLRNSSKSIGTN…
Prupe.6G058400.1.p	-9.74643	4.73309	0.0012672	0.107699	Down	XP_007205028.1	non-specific phospholipase C1 [Prunus persica]	77.63	0	sp|Q8L7Y9|NPC1_ARATH	Non-specific phospholipase C1 OS=Arabidopsis thaliana GN=NPC1 PE=2 SV=1	-	-	-	-	-	-	-	K01114|1|0.0|1108|pper:18772148|phospholipase C [EC:3.1.4.3]	GO:0008152//metabolic process	GO:0016788//hydrolase activity, acting on ester bonds	-	MAFRRIPITWTVFLYLLLVSTQSIHTARARKTPKIQGPIKTVVVLVMENRSFDHILGWLKSTRPEIDGLTGNESNPLSVSDPNSPRVPVSSDAFFIDSDPGHSIQAIREQIFGSNRSFEDPAPMNGFAQQAESMAEGMSSKVMSGFKPEVLPVYTELANEFAVFDRWFASVPASTQPNRFYVHSATSHGASSNVRKDLIHGFPQKTIFDSLDENALDFGIYYQNIPATLFFRSLRKLKHVTKFHSYALKFKLHAKRGKLPNYAVIEQRYFDVKELPANDDHPSHDVARGQRFVKEVYETLRASPQWKEMALLITYDEHGGFYDHVPTPVSGVPSPDGIVGPDPFYFRFDRLGVRVPTILVSPWIEKGTVIHEPTGPTPDSHFEHSSIPATVKKLFNLKS…
Prupe.6G065900.1.p	10.6164	8.61157	0.000916257	0.152892	Up	XP_007206064.1	18.5 kDa class I heat shock protein [Prunus persica]	77.64	4e-92	sp|P05478|HSP16_SOYBN	18.5 kDa class I heat shock protein OS=Glycine max GN=HSP18.5-C PE=3 SV=1	At1g53540	210	2e-70	KOG0710	Molecular chaperone (small heat-shock protein Hsp26/Hsp42)	O	Posttranslational modification, protein turnover, chaperones	K13993|1|6e-111|315|pper:18774990|HSP20 family protein	-	-	-	MSIIPSFRRGSIFDPSSLDIWDPFKDFPFPSSSSLSTFPKFSRENSAFLNTRIDWKETPEAHLFKADLPGLKKEEVKVEVEDNRVLQISGERNVEKEDKNDKWHRVERSSGKFLRRFQLPENAKLNEIKAAMENGVLSVTVPKAEVKKPDVKAIEISG
Prupe.6G067400.1.p	-10.2499	6.69959	0.000345956	0.0749215	Down	XP_007207351.1	uncharacterized protein LOC18773999 [Prunus persica]	-	-	-	-	-	-	-	-	-	-	-	-	-	-	-	MIFITCSAFLVFYLRKILSAALLCFINWVFLGNCFFGECFCLEWLFELTQRKKGNKMESAKKQGSAASSLTADLFGVKEPPPKSSTGIFASIFPPPSQVVGRNSSSSELTEYWQKQSLGNHAWNTKQGCPAISSEGARYSLPNKDRSSVLQEERAEPCYLSSSLYYGGQEVYSQSPSTHASGSYPIFKKDGGEDDPNGSNSNSAARGNWWQGSLYY
Prupe.6G077400.1.p	1.94861	0.42942	0.00190477	0.145599	Up	XP_021828478.1	mitochondrial import inner membrane translocase subunit Tim9 [Prunus avium]	87.1	3e-58	sp|Q9XGX7|TIM9_ORYSJ	Mitochondrial import inner membrane translocase subunit Tim9 OS=Oryza sativa subsp. japonica GN=TIM9 PE=3 SV=2	At3g46560	161	4e-53	KOG3479	Mitochondrial import inner membrane translocase, subunit TIM9	U	Intracellular trafficking, secretion, and vesicular transport	K17777|1|2e-64|194|pavi:110768914|mitochondrial import inner membrane translocase subunit TIM9	GO:0015031//protein transport	GO:0046872//metal ion binding	GO:0005739//mitochondrion	MDKSMIGDLDSLPEEDKLRMATMIDQLQIRDSLRMYNSLVERCFTDCVDTFKHKSLQKQEETCVRRCAEKFLKHSMRVGMRFAELNQGAATQD
Prupe.6G087500.1.p	10.2883	6.84629	2.54438e-05	0.000141037	Up	ONI00410.1	hypothetical protein PRUPE_6G087500 [Prunus persica]	32.62	5e-79	sp|O65924|Y2921_ARATH	Putative leucine-rich repeat receptor-like protein kinase At2g19210 OS=Arabidopsis thaliana GN=At2g19210 PE=3 SV=1	At3g19230	219	1e-63	KOG0619	FOG: Leucine rich repeat	R	General function prediction only	K16224|1|8e-80|274|brp:103829497|senescence-induced receptor-like serine/threonine-protein kinase!K04733|4|2e-76|263|rcu:8281590|interleukin-1 receptor-associated kinase 4 [EC:2.7.11.1]			GO:0016021//integral component of membrane	MCLFPYCSSVLGQLTMASSIVLLLLLIALALLSVSANLVSIDCGSSDSYTDENSIKWVGDDDFVQNGESQVVQTTNGVSNVMGTLRVFSTRKKNCYSIKAEKGSQFLVRASFYYGNYDKKSAPPSFDLQLDGNYWNTIQTSAEGVVYYEVIYITKGDSIELCLAQTQPNQLPFISAIEIRGLASDMYNHVDSEYAMLLTRRVAYGATEAIRYPSDDFDRIWDAVEVGNGLVKVTTDAQTIDTSVPDQPPVAAFQYGITTSKTSEAILLVTDLPPVEVPIYIIMYFSEVTELDSTQTRSFEIYIDGKSHFDPIVPAYGSVVEMSITNISASSNTSFSLVATSDSTLPPLINAMEVYYVSGPITDGTDSKDVAGLATLQDKFSTLQEWTGDPCLPSPFTWD…
Prupe.6G101900.1.p	-1.37228	0.289796	0.00517146	0.169711	Down	XP_007206026.1	uncharacterized protein LOC18772959 [Prunus persica]	-	-	-	-	-	-	-	-	-	-	-	K20855|1|2e-13|71.6|pavi:110763119|beta-1,3-galactosyltransferase 1/2/3/4/5/7/8 [EC:2.4.1.-]	-	-	-	MATSKSYYARPNYRYLSSDHHHPTLAPDSAFELDESDIYNFARSNSPEFRKPVPSSRVVSASKNRRSEAADRSDRTGGTAASLPVGIPDWSKILRDEYRENRKSDDDDDGDDDVEGGVRVPPHEFLARQMARTRIASFSVHEGVGRTLKGRDLSRVRNAIWEKTGFED
Prupe.6G102700.1.p	1.07672	0.324028	0.0104944	0.206821	Up	KCW51380.1	hypothetical protein EUGRSUZ_J00924, partial [Eucalyptus grandis]	97.26	1e-47	sp|Q9FGZ9|UBL5_ARATH	Ubiquitin-like protein 5 OS=Arabidopsis thaliana GN=UBL5 PE=3 SV=1	At5g42300	145	2e-47	KOG3493	Ubiquitin-like protein	O	Posttranslational modification, protein turnover, chaperones	K13113|1|2e-47|148|atr:18429464|ubiquitin-like protein 5	-	-	-	MIEVVLNDRLGKKVRVKCNEDDTIGDLKKLVAAQTGTRADKIRIQKWYNIYKDHITLKDYEIHDGMGLELYYN
Prupe.6G107300.1.p	10.5459	8.18575	2.60184e-05	0.000765551	Up	XP_007206157.1	SNF1-related protein kinase regulatory subunit beta-3 [Prunus persica]	63.25	5e-48	sp|Q9ZUU8|KINB3_ARATH	SNF1-related protein kinase regulatory subunit beta-3 OS=Arabidopsis thaliana GN=KINB3 PE=1 SV=1	At2g28060	149	1e-47	KOG1616	Protein involved in Snf1 protein kinase complex assembly	G	Carbohydrate transport and metabolism	K07199|1|1e-66|200|pop:7463306|5'-AMP-activated protein kinase, regulatory beta subunit	GO:0009744//response to sucrose;GO:0043562//cellular response to nitrogen levels	GO:0019887//protein kinase regulator activity	-	MNNSFGDDYDEATVAGFEVLRSPDASYDNVYPGNEDEARDPPLVPPHLQQTLLSYPASADTAGTLPLPQNVTLNHLYIENRESPRSVVALGFTHRFRSKFVTVVLYKPVQRRGTTST
Prupe.6G113200.1.p	-10.3855	7.35845	0.000197913	0.989064	Down	XP_007205945.1	50S ribosomal protein L9, chloroplastic [Prunus persica]	70.77	5e-89	sp|P25864|RK9_ARATH	50S ribosomal protein L9, chloroplastic OS=Arabidopsis thaliana GN=RPL9 PE=2 SV=1	At3g44890	259	9e-89	KOG4607	Mitochondrial ribosomal protein L9	J	Translation, ribosomal structure and biogenesis	K02939|1|5e-140|392|pper:18772425|large subunit ribosomal protein L9	GO:0006412//translation	GO:0003735//structural constituent of ribosome	GO:0005840//ribosome	MASTASTLSWSSSSLLQSFAANTNEACKLSDRRTGLVVFAQKKAKKARTIILKEDIADLGKKGELRSVKAGYYRNYLLPLGKAQLVTPVLLKEMKMEDERIEAEKIRVKEEAQQLAIIFETVGGFKVKRKGGKGKLIFGSVTPQDLVDIIKAQLNRDVDKRIVSLPDIREIGEYIAELKLHPEVTAKVRVIVSAN
Prupe.6G113800.1.p	10.5234	8.06439	0.01795	0.000343195	Up	XP_007207527.1	cyclin-dependent kinases regulatory subunit 1 [Prunus persica]	87.5	6e-50	sp|Q9SJJ5|CKS2_ARATH	Cyclin-dependent kinases regulatory subunit 2 OS=Arabidopsis thaliana GN=CKS2 PE=1 SV=1	At2g27970	152	1e-49	KOG3484	Cyclin-dependent protein kinase CDC28, regulatory subunit CKS1, and related proteins	D	Cell cycle control, cell division, chromosome partitioning	K02219|1|3e-59|179|pavi:110755337|cyclin-dependent kinase regulatory subunit CKS1	GO:0051301//cell division;GO:0007049//cell cycle	GO:0016538//cyclin-dependent protein serine/threonine kinase regulator activity	-	MGQIQYSEKYFDDIYEYRHVVLPQEVAKLLPKNRLLSENEWRAIGVQQSRGWVHYAIHRPEPHIMLFRRPLNYQQQQENQAQQVLAK
Prupe.6G122500.1.p	10.6661	8.90433	0.019589	0.152892	Up	XP_007205234.1	histone deacetylase 9 isoform X1 [Prunus persica]	87.97	0	sp|Q8H0W2|HDA9_ARATH	Histone deacetylase 9 OS=Arabidopsis thaliana GN=HDA9 PE=1 SV=1	At3g44680	765	0	KOG1342	Histone deacetylase complex, catalytic component RPD3	B	Chromatin structure and dynamics	K06067|1|0.0|895|pavi:110746156|histone deacetylase 1/2 [EC:3.5.1.98]	GO:0006355//regulation of transcription, DNA-templated;GO:0006351//transcription, DNA-templated	GO:0046872//metal ion binding;GO:0032041//NAD-dependent histone deacetylase activity (H3-K14 specific)	GO:0005634//nucleus	MRSKDKIAYFYDGDVGSVYFGPNHPMKPHRLCMTHHLVLSYDLHKKMEIYRPHKAYPVELAQFHSADYVEFLHRITPDTQHLFSNELARYNLGEDCPVFDNLFEFCQIYAGGTIDAARRLNNKLCDIAINWAGGLHHAKKCEASGFCYINDLVLGILELLKHHARVLYIDIDVHHGDGVEEAFYFTDRVMTVSFHKFGDMFFPGTGDVKEVGEREGKFYAINVPLKDGIDDTSFNRLFKTIISKVVETYLPGVIVLQCGADSLAGDRLGCFNLSIDGHAECVRFVKKFNLPLLVTGGGGYTKENVARCWTVETGVLLDSELPNEIPENEYIKYFSPDFSLRIPNGHIENLNSKSYISTIKMQVLENLRCIQHAPNVQMQEVPPDFYIPDFDEDAQNPDE…
Prupe.6G130400.1.p	-10.4544	7.71543	2.13708e-05	0.213843	Down	XP_020421175.1	probable calcium-binding protein CML48 [Prunus persica]	52.94	1e-82	sp|Q9ZQH1|CML48_ARATH	Probable calcium-binding protein CML48 OS=Arabidopsis thaliana GN=CML48 PE=2 SV=2	At2g27480	222	2e-73	KOG0037	Ca2+-binding protein, EF-Hand protein superfamily	T	Signal transduction mechanisms	K13448|1|2e-179|495|pper:18773847|calcium-binding protein CML	-	-	-	MASNGKHGSPSYVPSAPSLPESYRQQYFQGSGGSYGYWQQHSQGNGSSYSYGQQQGPSSYGHSGFPPGTDPAVISSFQMVDRDRSGFIDDNELQQALSSGYQRFSLRTIRLLIFLFKSPNDPLRVGPKEFAALWTCLGQWRGIFEKYDKDRSGKIDSMELRDALYSLGLAIPPSVLQLLISKYDDGSGSRVELNFDSFVECGMIVKGLTDKFKERDLRYTGSATINYDTFMSMVIPFFVSYN
Prupe.6G132600.1.p	10.3976	7.38684	0.000110225	0.0142012	Up	ONI01323.1	hypothetical protein PRUPE_6G132600 [Prunus persica]	-	-	-	-	-	-	-	-	-	-	-	K13680|1|2e-21|95.1|obr:102721899|beta-mannan synthase [EC:2.4.1.32]	GO:0009269//response to desiccation	-	-	MGIKLDWSWSSAIIGAASALATTALISSKPKDPTFDVVSIKLTSFKLNFPLLDAELILTVQVTNPNVVPIQYSSTTMSIFYKGALLGSADVEAGSQPAKSSQLLQLPARLDGLQLAHHAASFIADAARREMVLDAAVDIAGTARVLWWDHKFKVHVDSHITVDPVFLEVIDQENKSKMDISLTGV
Prupe.6G145600.1.p	-10.4297	7.58513	0.00714105	0.21243	Down	XP_007205799.1	dnaJ homolog subfamily C member 8 [Prunus persica]	44.64	9e-07	sp|Q9FH28|DNJ49_ARATH	Chaperone protein dnaJ 49 OS=Arabidopsis thaliana GN=ATJ49 PE=2 SV=2	Hs7657611	107	9e-28	KOG1150	Predicted molecular chaperone (DnaJ superfamily)	O	Posttranslational modification, protein turnover, chaperones	K09528|1|2e-176|488|pmum:103329365|DnaJ homolog subfamily C member 8	-	-	-	MDDDLLLKNFFAEVSEVERDNQVLRILSCFKLNPFEYLNLPFDASPEDVKKQYRKLSLMVHPDKCKHPQAKEAFGALAKAQQLLLDQQERDYIISQVNAAKDELRAKRKKQLKKDTASKIKSLVDEGKYEQQYEQSEEFQQELKMKVREILTEQEWRRRKMQMRISEEEGRLKKDEEETKEMWKRKREHEEQWEGTREQRVSSWRDFMKGGKKAKKGEIRPPKLKTEDPNKSYVQRPVKRG
Prupe.6G158000.1.p	-10.4137	7.50247	0.000105101	0.349713	Down	XP_007206065.1	uncharacterized protein LOC18772466 [Prunus persica]	49.55	3e-32	sp|P82194|RK17_SPIOL	50S ribosomal protein L17, chloroplastic OS=Spinacia oleracea GN=RPL17 PE=1 SV=2	At5g09770	259	6e-90	KOG3280	Mitochondrial/chloroplast ribosomal protein L17	J	Translation, ribosomal structure and biogenesis	K02879|1|1e-114|325|pper:18772466|large subunit ribosomal protein L17	GO:0006412//translation	GO:0003735//structural constituent of ribosome	GO:0015934//large ribosomal subunit;GO:0005840//ribosome	MTKFRKLNRPTGHRMSMLRTMVSQLVKHERIETTVAKAKEIRREADKMVQLGKDGSLCAVRRAAAFVRGDDVMHKLFTELAYRYKDRTGGYTRLLRTRIRVGDAAPMAYIEFIDRENELRQSKPPAPQPQRVPLDPWARSKLCKQFAPPKEDKSSDI
Prupe.6G169200.1.p	-10.3888	7.37198	2.23722e-05	0.0903656	Down	XP_007206442.1	RNA cytidine acetyltransferase 1 [Prunus persica]	71.5	0	sp|Q9XIK4|NT101_ARATH	RNA cytidine acetyltransferase 1 OS=Arabidopsis thaliana GN=At1g10490 PE=2 SV=2	At1g10490	1459	0	KOG2036	Predicted P-loop ATPase fused to an acetyltransferase	R	General function prediction only	K14521|1|0.0|2120|pper:18773206|N-acetyltransferase 10 [EC:2.3.1.-]	GO:0002101//tRNA wobble cytosine modification;GO:0051391//tRNA acetylation;GO:0000154//rRNA modification;GO:0042274//ribosomal small subunit biogenesis;GO:1904812//rRNA acetylation involved in maturation of SSU-rRNA	GO:0051392//tRNA N-acetyltransferase activity;GO:0000049//tRNA binding;GO:0008080//N-acetyltransferase activity;GO:1990883//rRNA cytidine N-acetyltransferase activity;GO:0005524//ATP binding	GO:0005730//nucleolus;GO:0016021//integral component of membrane;GO:0030686//90S preribosome	MRKKVDERIRTLISNGVKNRHRSMFVIVGDKSRDQIVNLHYMLSNEVKKSRPTVLWCYKDKLELSSHKKKRAKQVKKLMQRGLLDPEKVDPFSLFVESGGLTYCLYKDSERVLGNTFGMCILQDFEALTPNLLARTIETVEGGGLIILLLRSLSSLTNLYTMVMDVHDRFRTESHSKATGRFNERFLLSIASCKACVVMDDELNILPISSHMRSIAPVPVKEDSEGISESQRELKDLKEQLSDAFPVGPLIKKCCTLDQGNAVATFLDTILDKTLRSTVALLAARGRGKSAALGLAIAGAIAAGYSNIFVTAPSPENLKTLFEFVCKGFDALEYKEHIDYDVQKSSDPLLKKATVQINIFKQHRQTIQYIRPQEHEKLSQVELLVVDEAAAIPLPVVKS…
Prupe.6G189600.1.p	-1.50812	0.535807	0.037342	0.298446	Down	XP_007205593.1	monoacylglycerol lipase abhd6-A [Prunus persica]	24.47	6e-09	sp|Q0J0A4|LPAAT_ORYSJ	Probable 1-acylglycerol-3-phosphate O-acyltransferase OS=Oryza sativa subsp. japonica GN=Os09g0520200 PE=3 SV=3	At5g09430	383	6e-134	KOG1454	Predicted hydrolase/acyltransferase (alpha/beta hydrolase superfamily)	R	General function prediction only	K22369|1|6e-42|151|nsy:104235966|epoxide hydrolase 4 [EC:3.3.-.-]		GO:0003824//catalytic activity	-	MPGCFSLTASRDRCFRYSFSSHGLKSTTTDLGEGTIMHCWVPKSHSQSKPTLLLIHGIGANAMWQWHEFVAPLASRFNLYIPDLIFFGDSFSTRPDRSETFQAQCVVGLLEAHGVKKMSVAGISYGGFVAYSMAAQFGERIERLVLCCAGVCTEEKDMEKGMFQVRSVEEAVSILLPQRPQQVRQLLKISFHKPAKNVPSCFLNDFIEVMCTEHLQERKGLIQALHKDRKLSDLPKISHPTLIIWGEHDLVFPLELAHRLKRQIGESSQLVILKNAGHAINVEKPKEMYKHMKSFLIDPLAPPKQESHSNGRKVD
Prupe.6G191200.1.p	10.5639	8.2948	0.0192599	0.00414077	Up	XP_007208468.1	phospho-2-dehydro-3-deoxyheptonate aldolase 2, chloroplastic [Prunus persica]	76.34	0	sp|P37216|AROG_SOLLC	Phospho-2-dehydro-3-deoxyheptonate aldolase 2, chloroplastic OS=Solanum lycopersicum PE=2 SV=1	-	-	-	-	-	-	-	K01626|1|0.0|1112|pper:18774550|3-deoxy-7-phosphoheptulonate synthase [EC:2.5.1.54]	GO:0009423//chorismate biosynthetic process;GO:0009073//aromatic amino acid family biosynthetic process	GO:0003849//3-deoxy-7-phosphoheptulonate synthase activity	GO:0009507//chloroplast	MALTNPATLSSKSLCNTHSLSPPTPQSHQPIFSPFLTKRKTLHPICAAAAADSGKAPVVAEKPPKASTEVKPVSGKWSLESWKTKKALQLPEYPDQNALETVLQTIESFPPIVFAGEARHLEEKLAEAALGNAFLLQGGDCAESFKEFSANNIRDTFRVMLQMGVVLMFGGQMPVIKVGRMAGQFAKPRSEAYEVKDGVKLPSYKGDNINGDAFDEKSRNPDPQRLIRAYCQSAATLNLLRSFATGGYAAMQRVTQWNLDFAQNSEQGDRYQELASRVDEALGFMTAAGLTIEHPIMTTTDFWTSHECLHLPYEQSLTRKDSTSGLYYDCSAHMLWVGERTRQLDGAHVEFLRGLANPLGIKVSNKMDPKELVNIIEILNPSNKPGRITIIARMGAENM…
Prupe.6G194700.1.p	-9.87091	5.14706	3.21087e-05	3.13752e-06	Down	XP_007205260.1	histidinol-phosphate aminotransferase, chloroplastic [Prunus persica]	77.99	0	sp|O82030|HIS8_TOBAC	Histidinol-phosphate aminotransferase, chloroplastic OS=Nicotiana tabacum GN=HPA PE=2 SV=1	At5g10330	633	0	KOG0633	Histidinol phosphate aminotransferase	E	Amino acid transport and metabolism	K00817|1|0.0|853|pper:18774982|histidinol-phosphate aminotransferase [EC:2.6.1.9]	GO:0000105//histidine biosynthetic process	GO:0030170//pyridoxal phosphate binding;GO:0004400//histidinol-phosphate transaminase activity	-	MLMGVIDIYNASSLRLTNISISRRPSCGTEGNKRTVVAMASTTPVQKKVSEVQQRLTGDSFIRPHLRNLSPYQSILPFEVLSAQLGRKPEDIIKLDANENPYGPPPEVFEALGALKFPYIYPDPESRRLRAALAKDSGLESDYILVGCGADELIDLIMRCVLDPGDKIVDCPPTFTMYEFDAAVNGASVIKVPRKSDFSLDVDVISEVVVQEKPKCIFLTSPNNPDGSIISDEILLKVLELPVLVVLDEAYIEFSGLESRMQWVKKHENLIVLRTFSKRAGLAGLRVGYGAFPLTIIEYLWRAKQPYNVSVTAEVSACAALQNPTYLETVKDALLQERERLYNLLKELPFLNPYPSYSNFILCEVTSGVDAKKLKEDLAKMGVMIRHYNNKELRGYVRI…
[truncated: 116 more rows]

## Sheet: 249 DEPs in MT_WL vs CK
Supplementary Table S3 List of DEPs in comparison groups
[truncated: 250 more rows]
